# Supplementary material for: Atlas-scale single-cell chromatin accessibility using nanowell-based combinatorial indexing
Source: HighWire-hosted journal article supplement (doi:10.1101/gr.276655.122), 2023-02-01

chr19:46098324-46198325

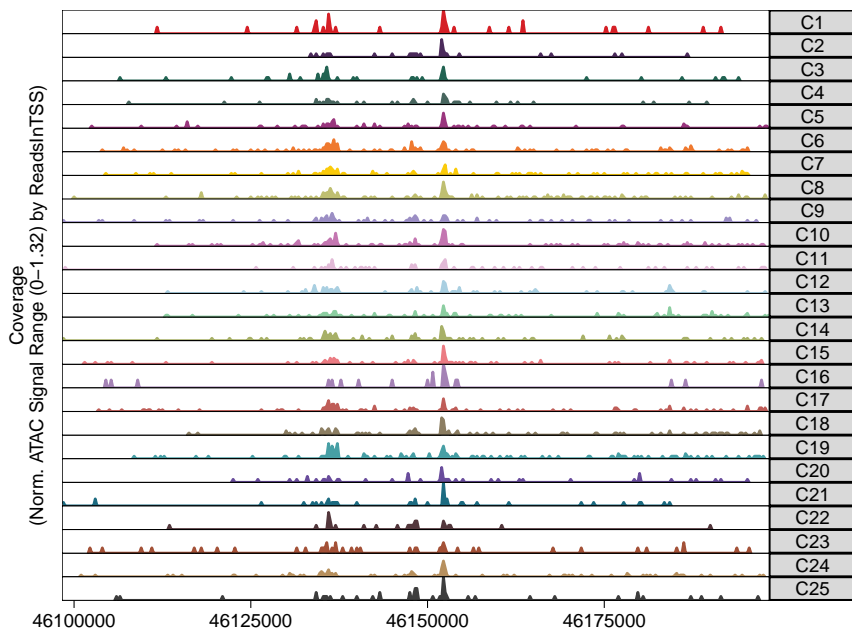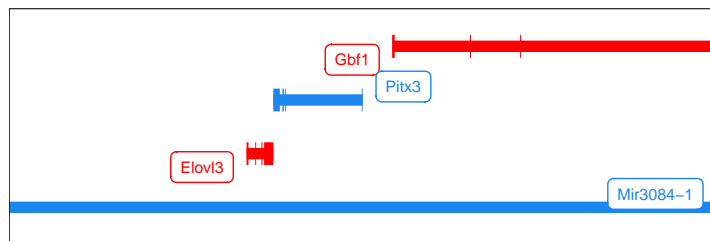

Genes

chr2:152326565-152426566

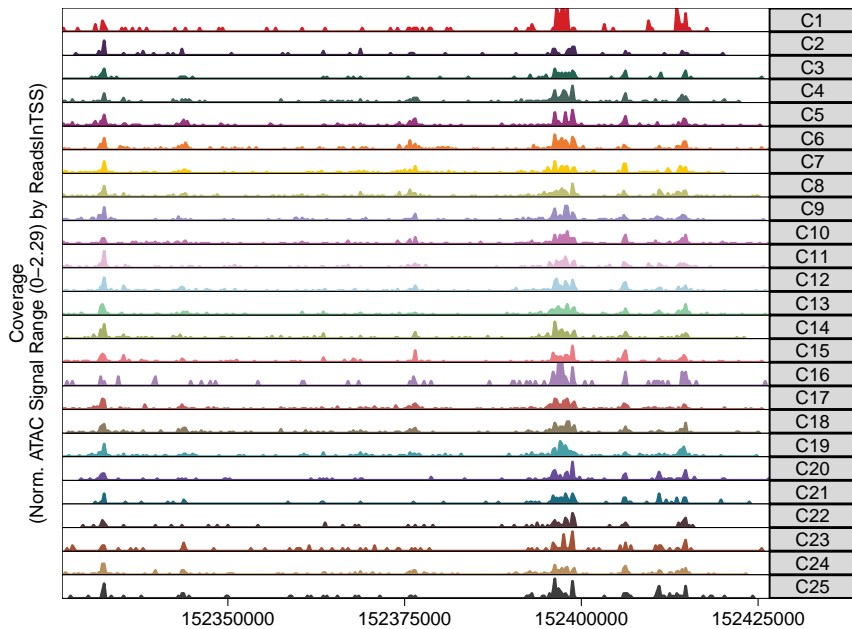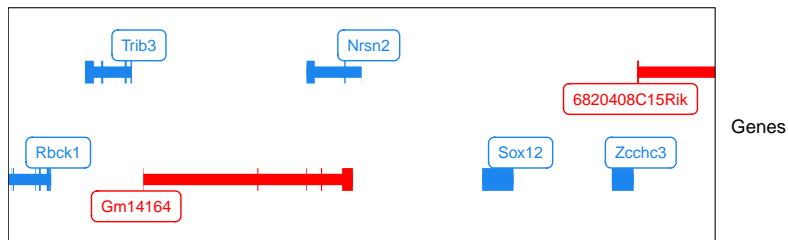

chr18:12922251-13022252

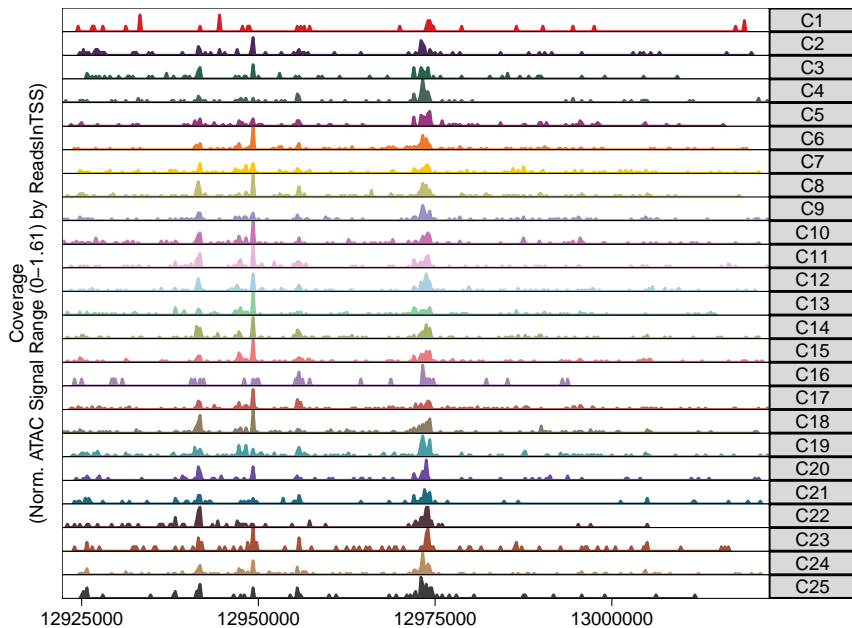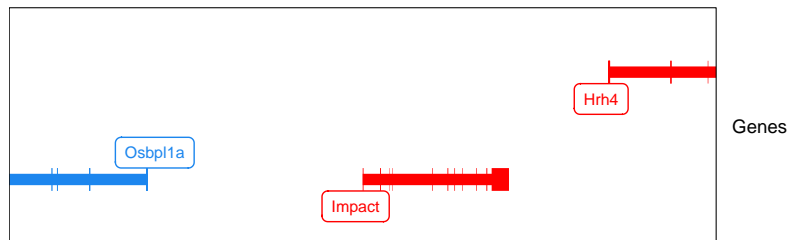

chr6:124719672–124819673

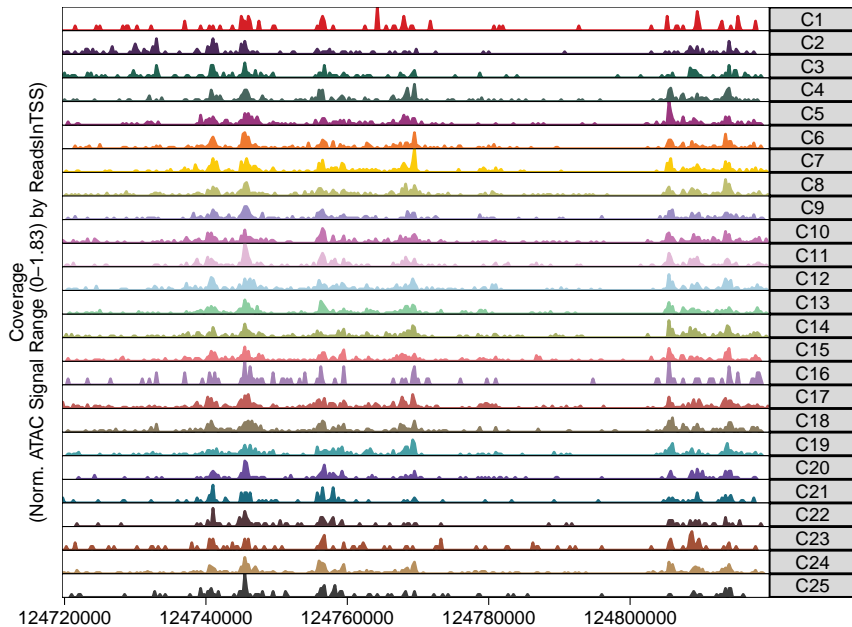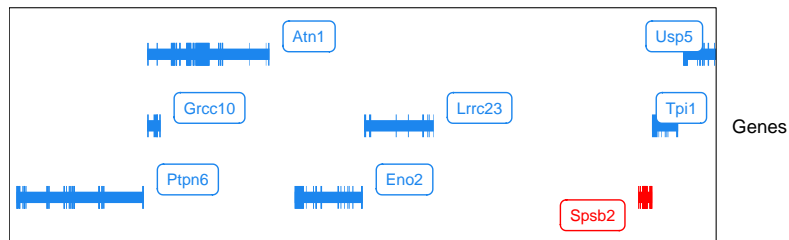

chr1:75169293–75269294

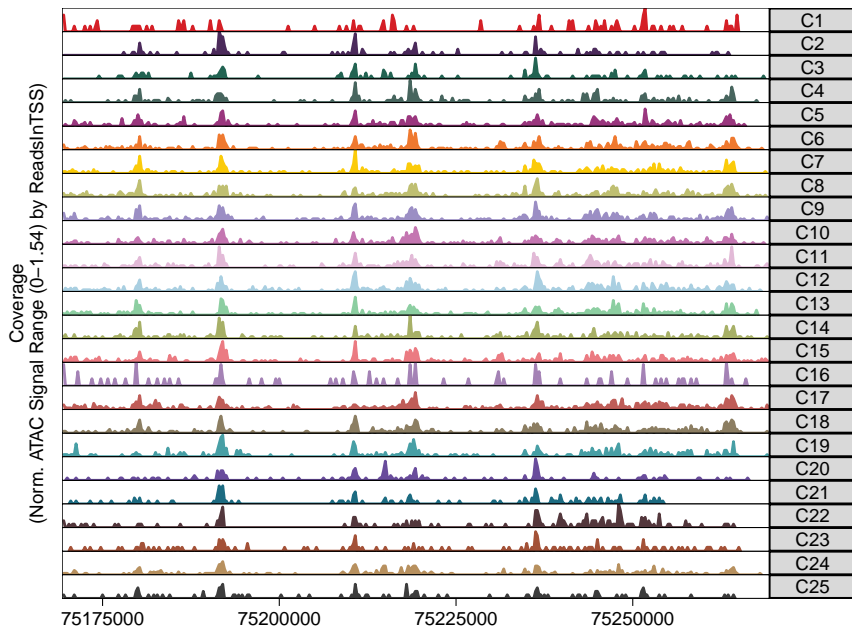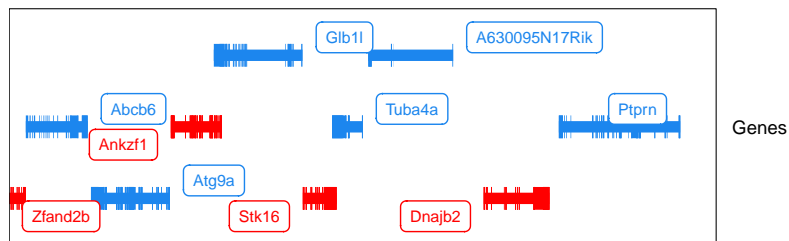

chrX:73830833-73930834

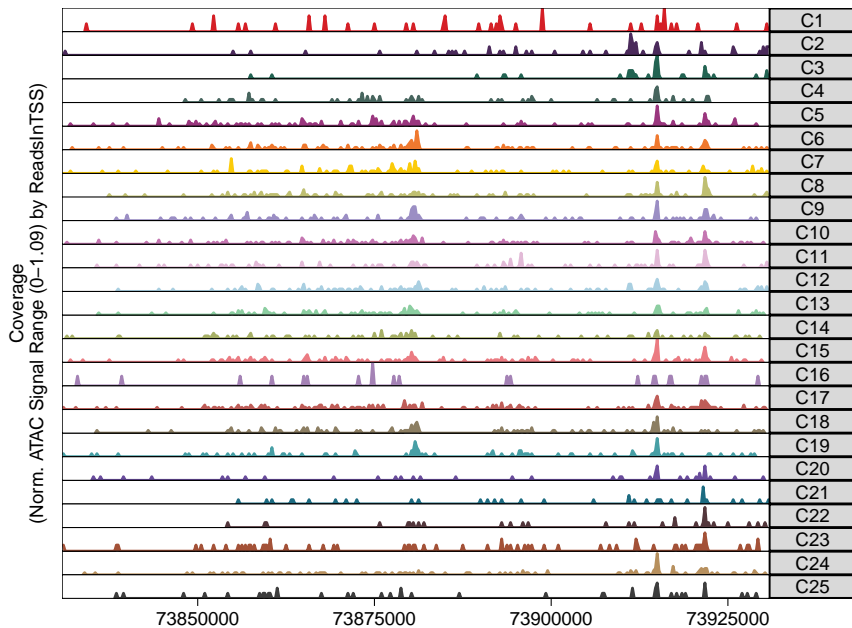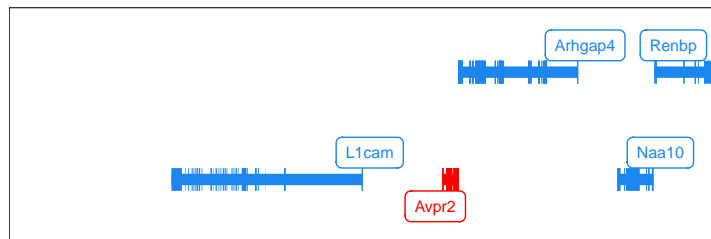

chr12:107953413-108053414

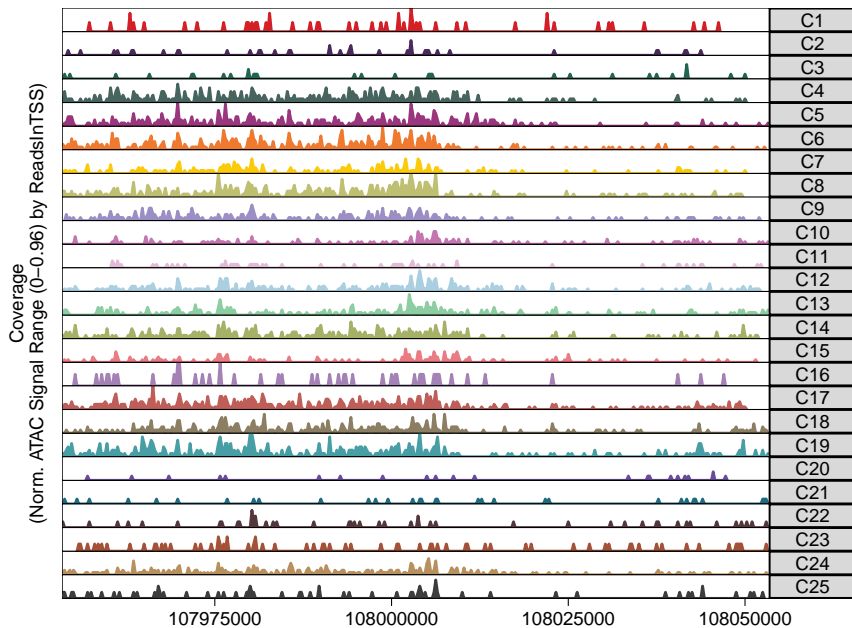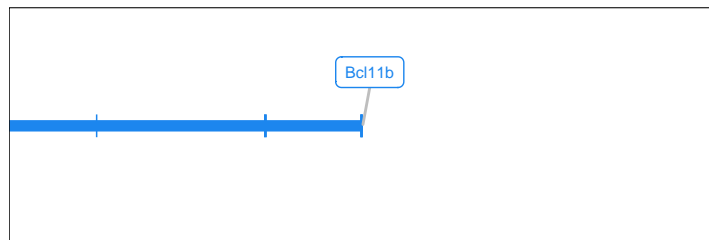

Genes

chr11:21951650–22051651

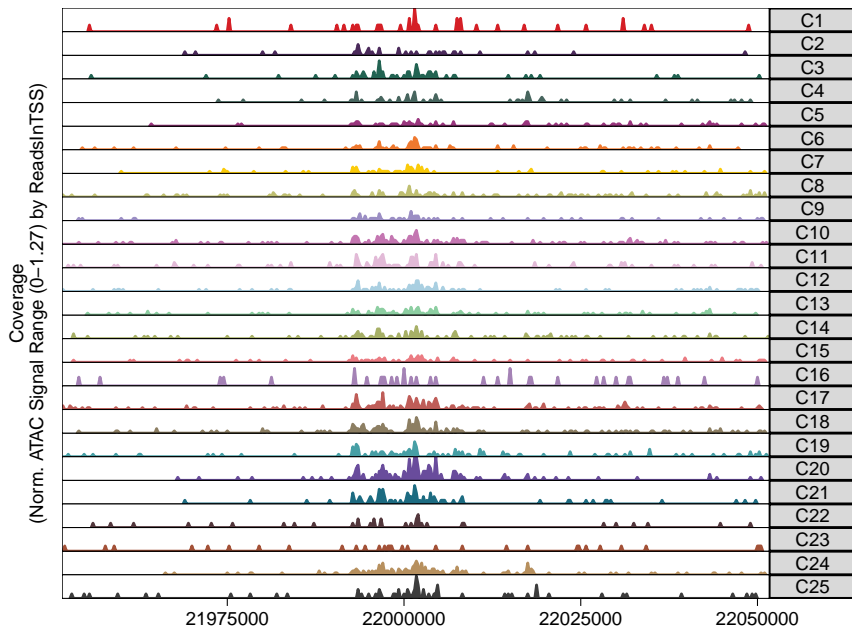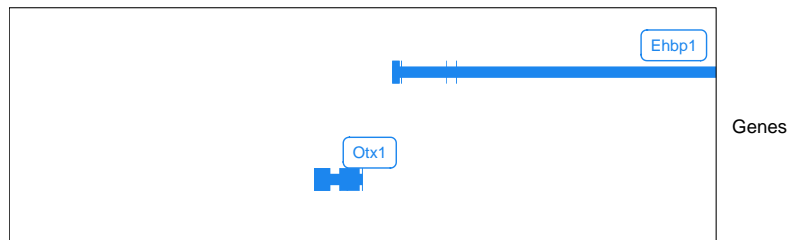



chr14:61310444-61410445

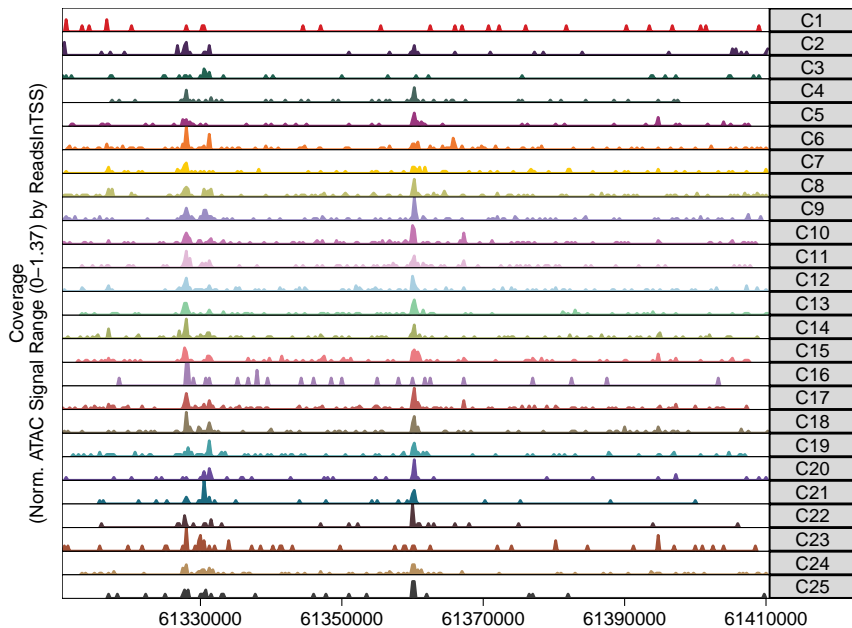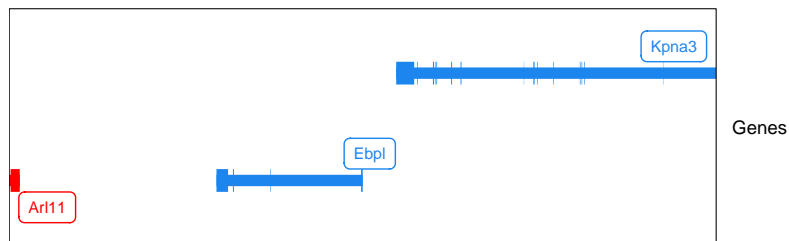

chr13:96620935-96720936

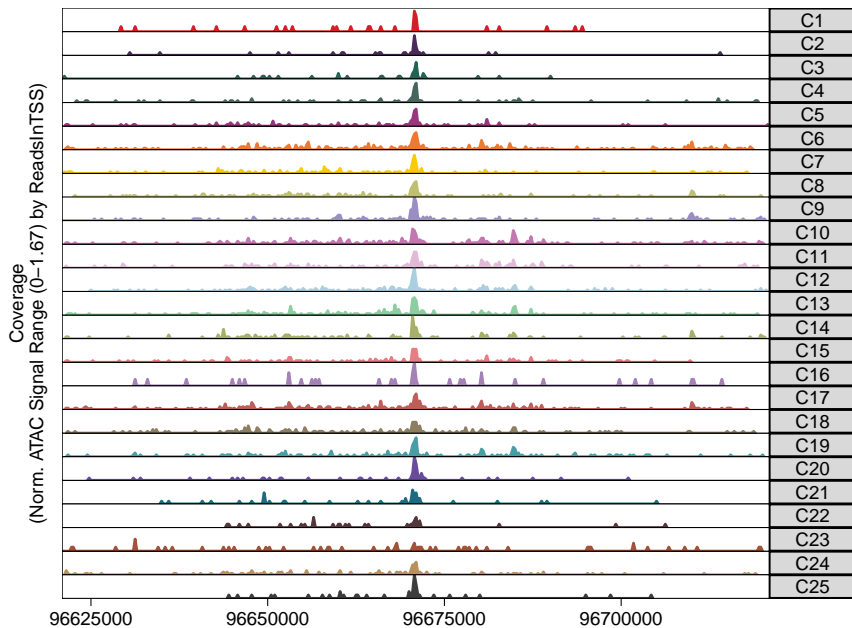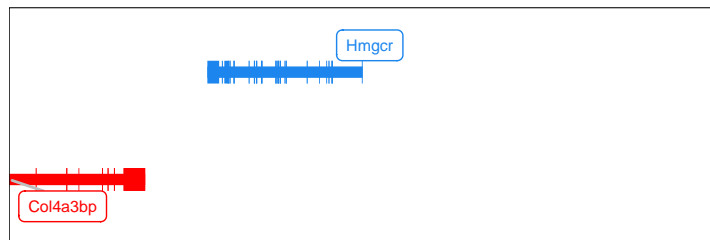

Genes

chr13:12290731-12390732

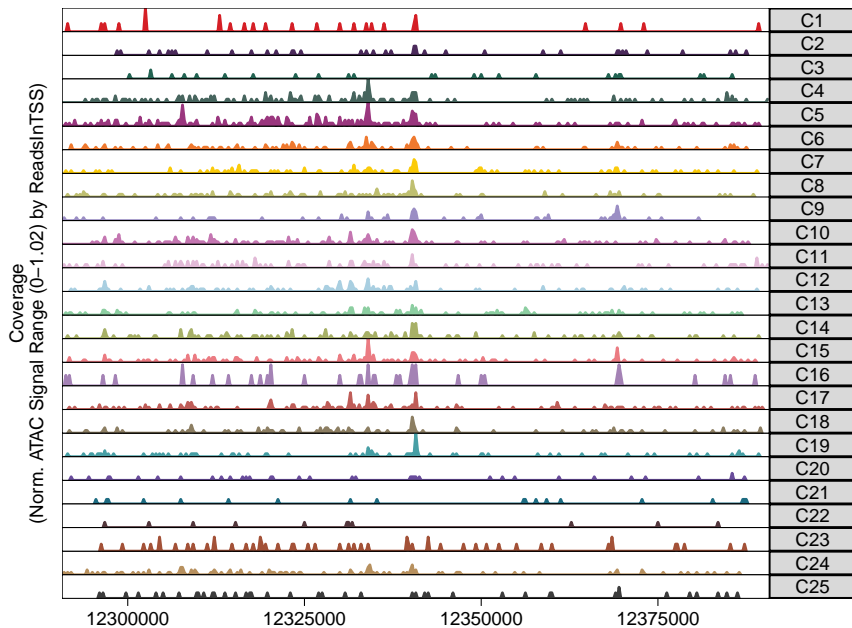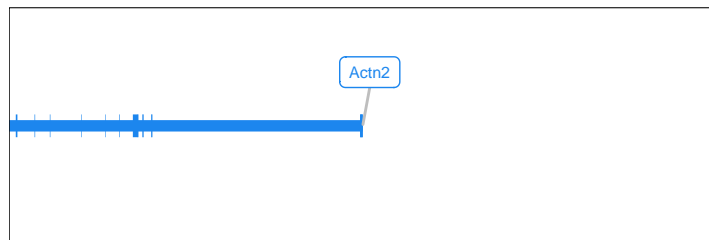

Genes

chr9:37502744–37602745

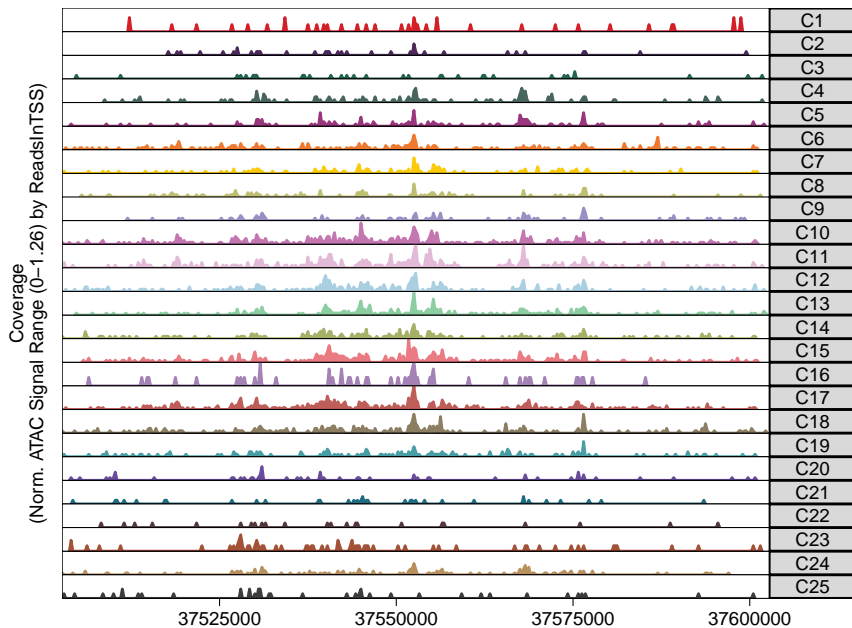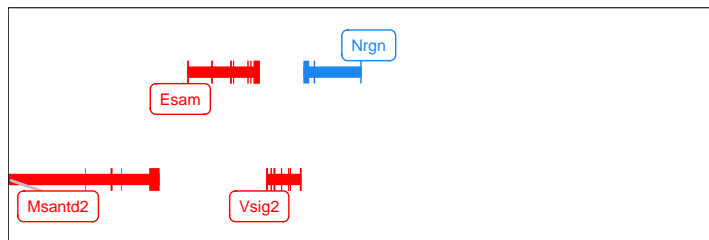

Genes

chr4:15831263–15931264

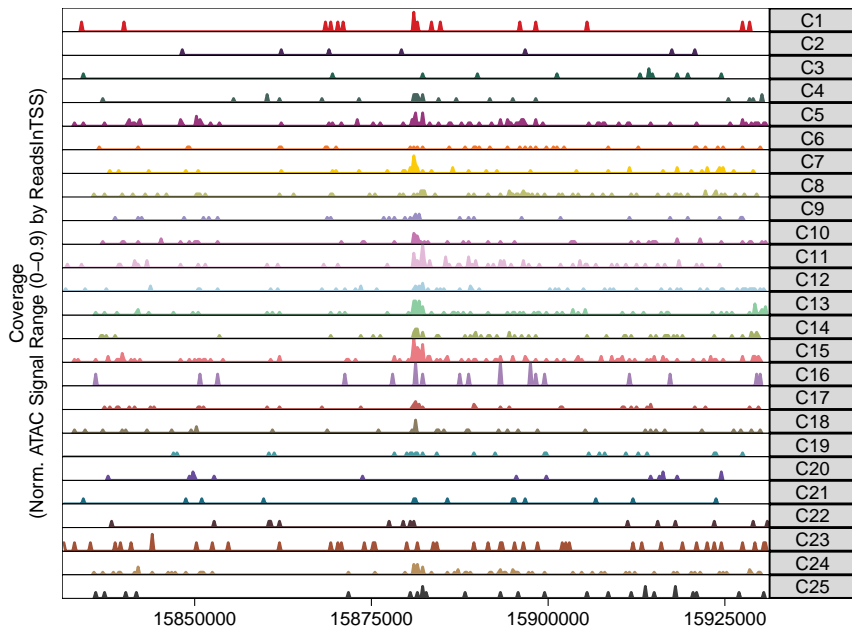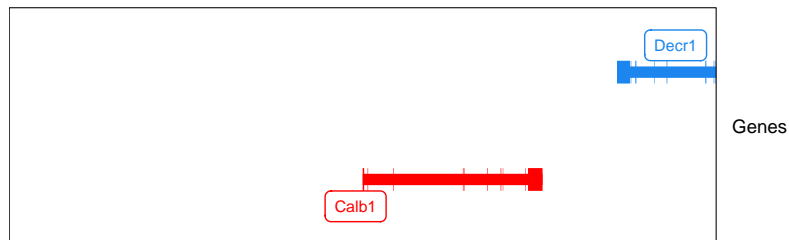

chr1:59187230–59287231

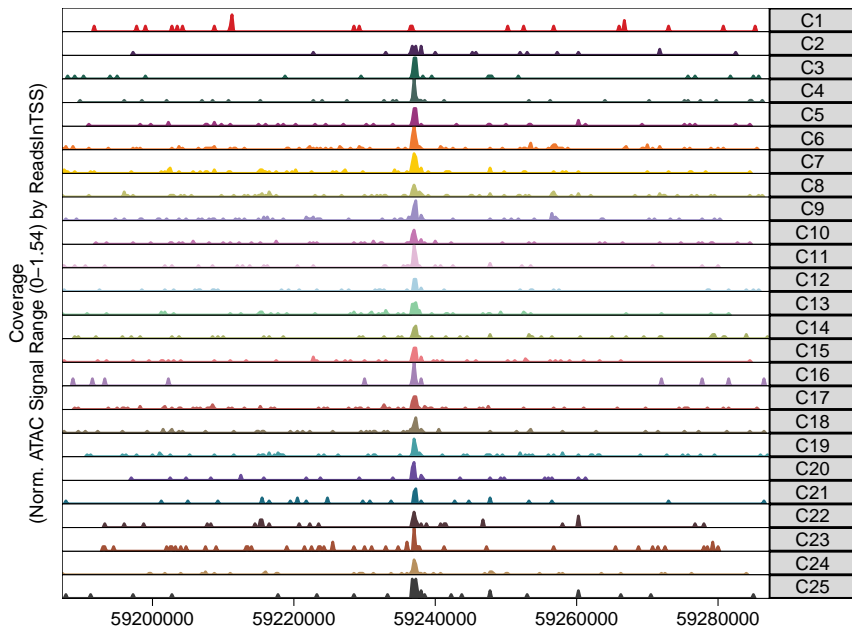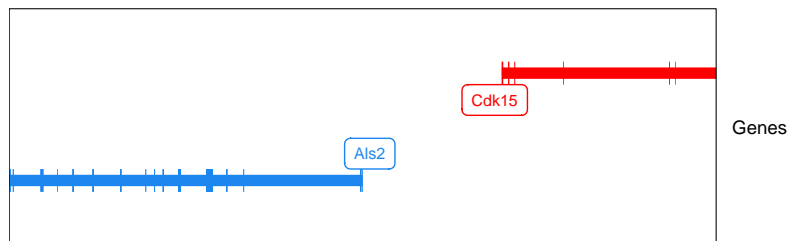

chr11:55262256-55362257

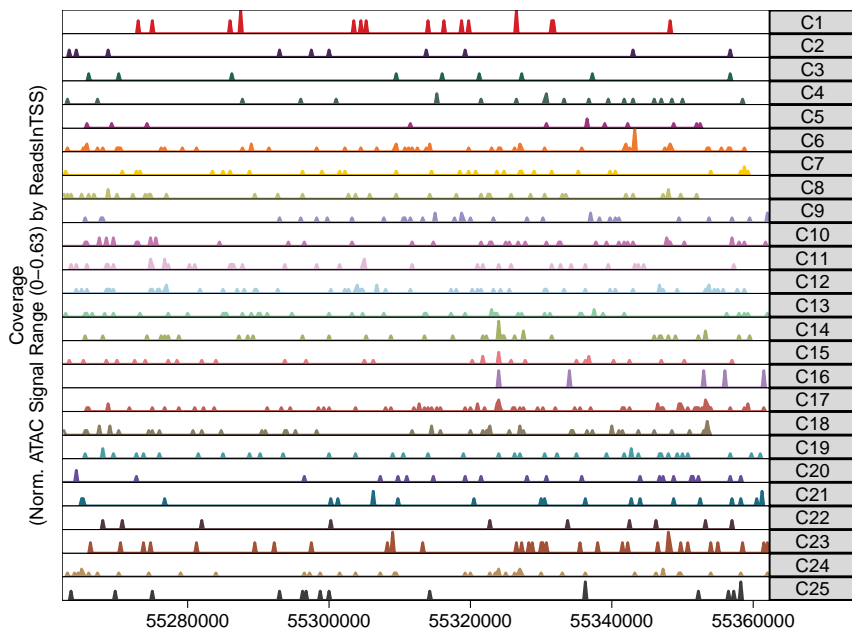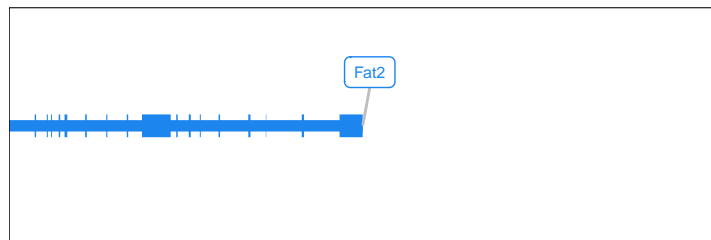

Genes

chr1:109932326-110032327

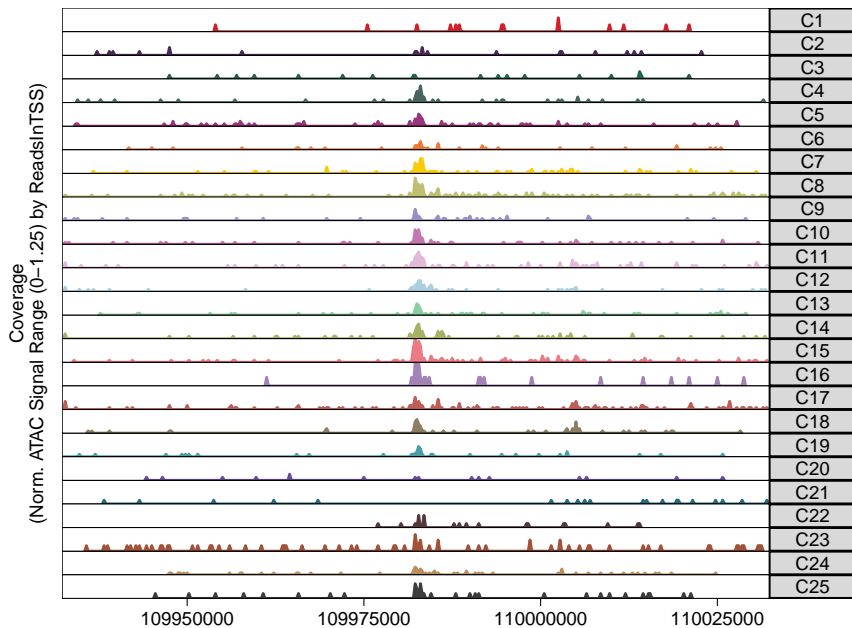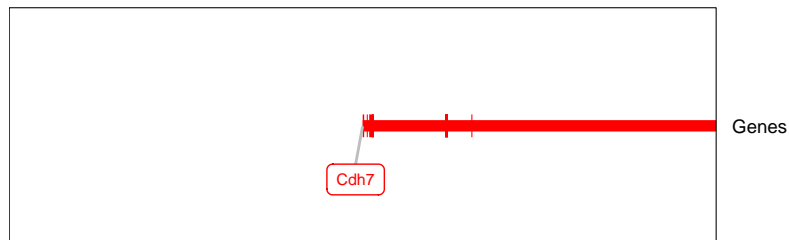



chr10:128220575-128320576

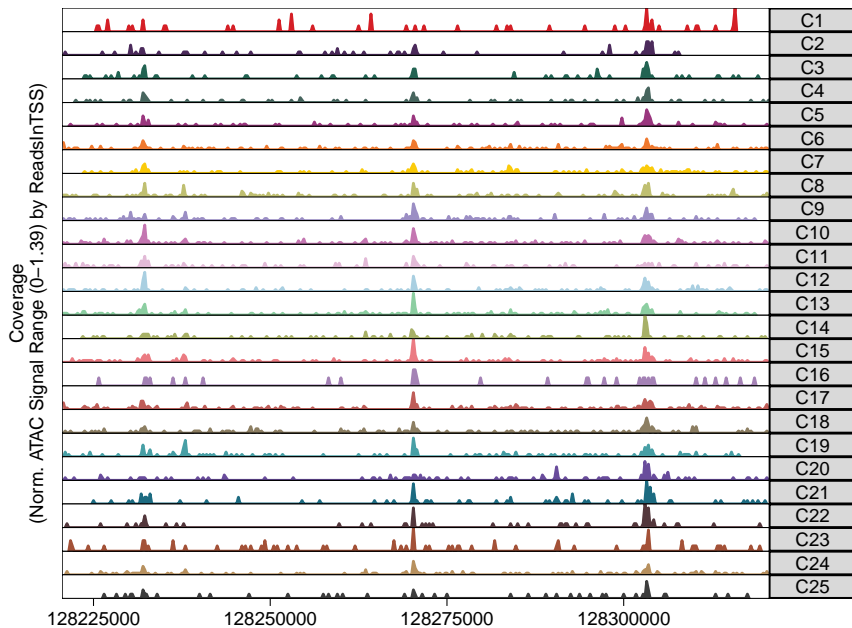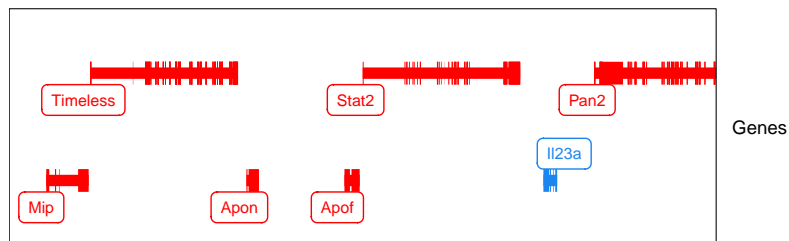

chr9:56815103-56915104

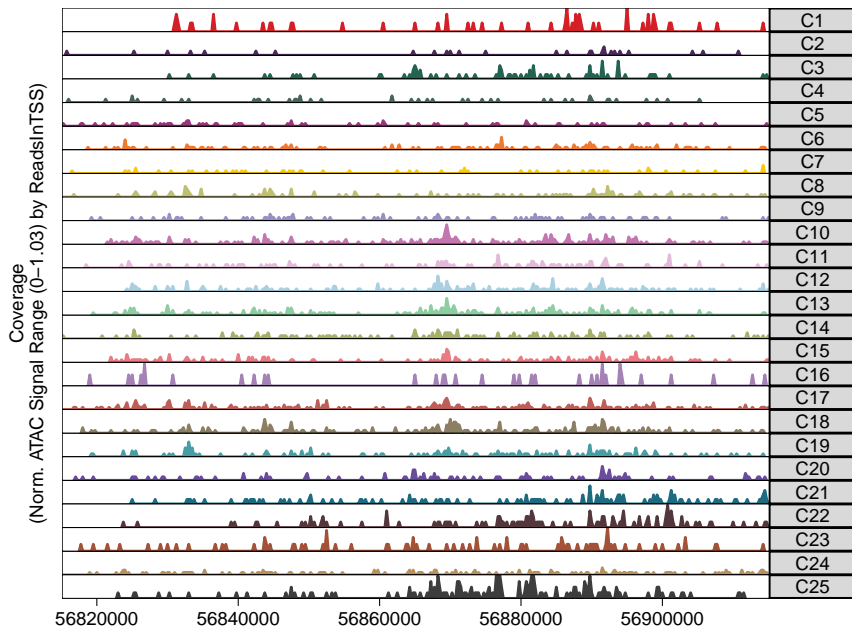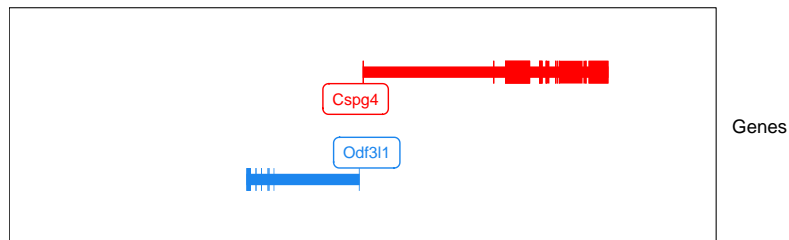

chr16:91219768-91319769

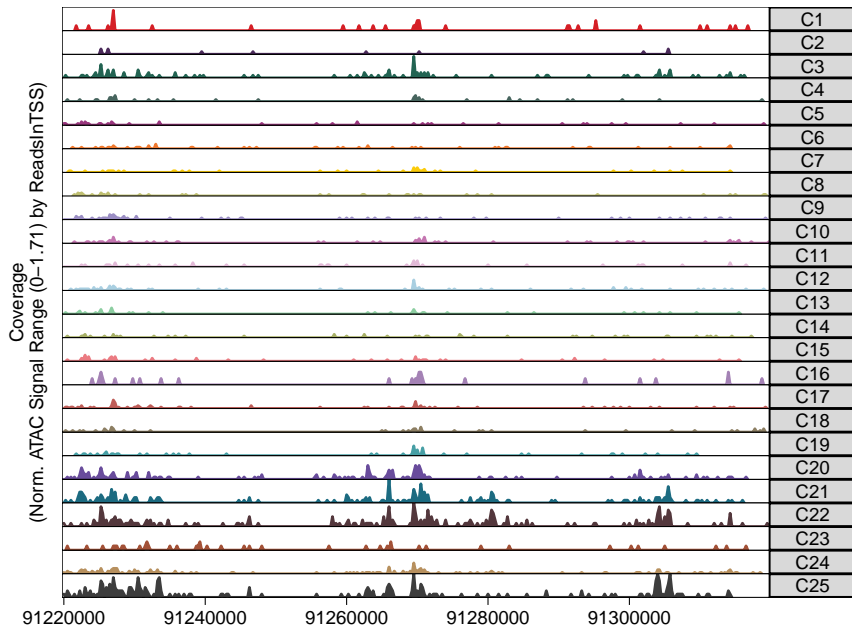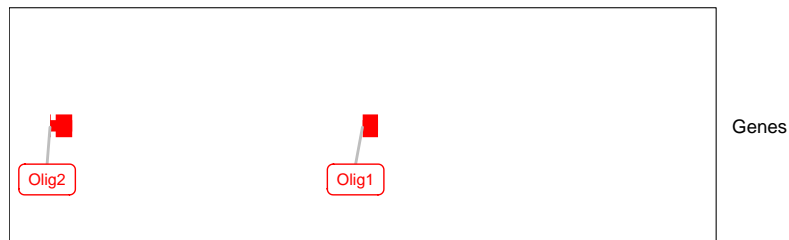

chr9:120099741-120199742

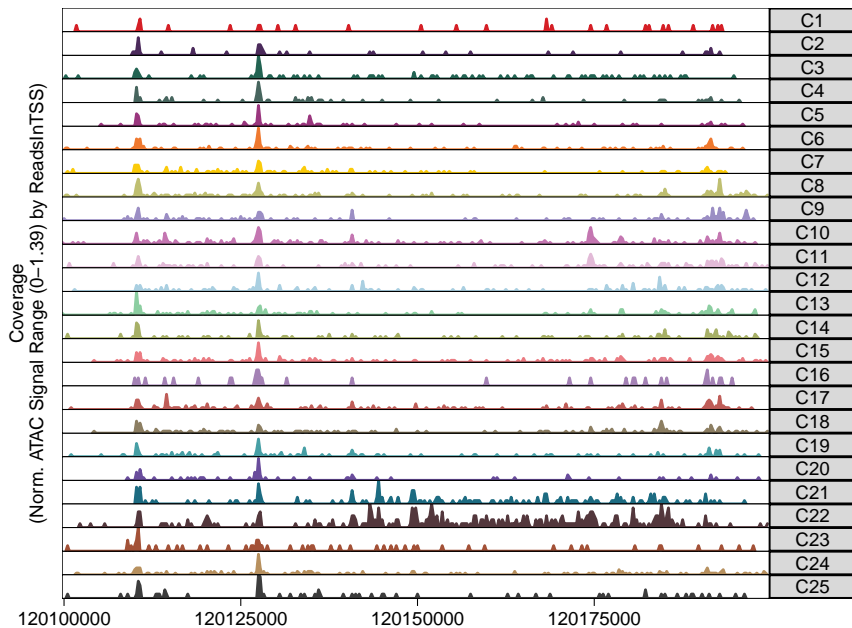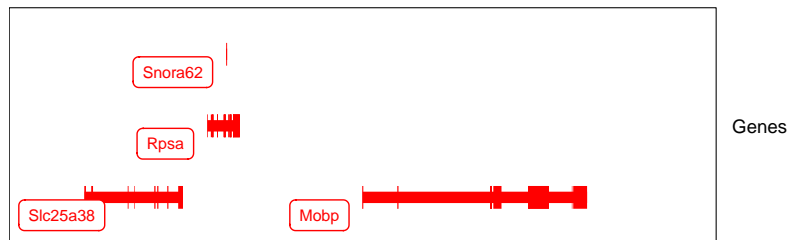

chr17:36973397-37073398

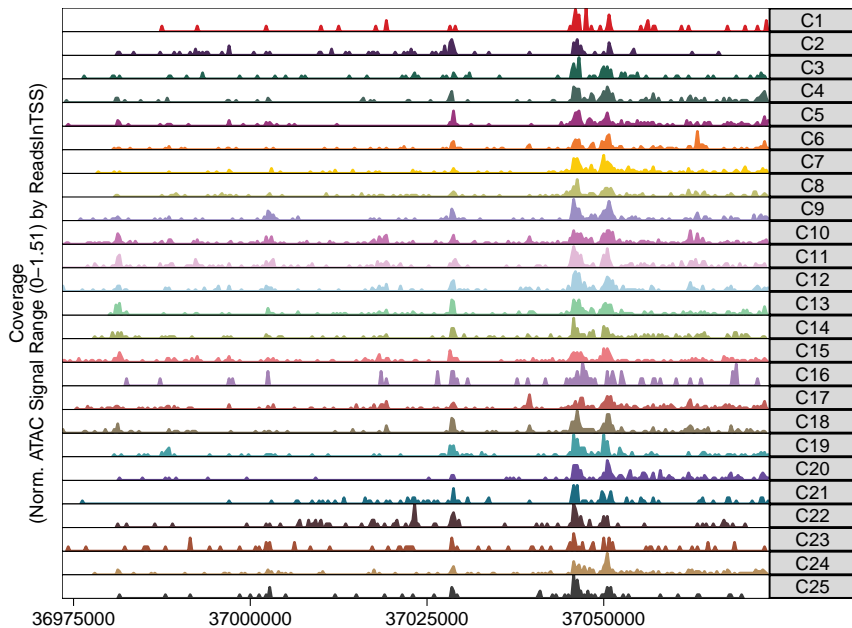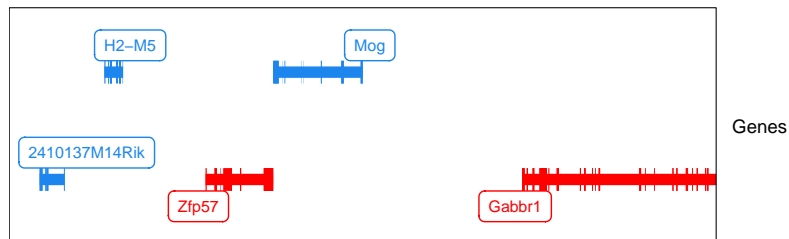

chr3:31099919-31199920

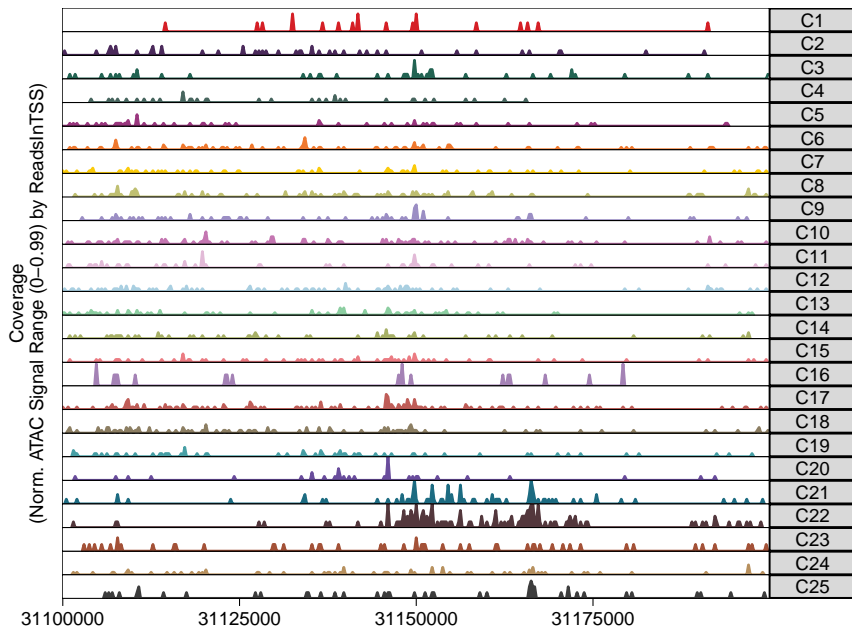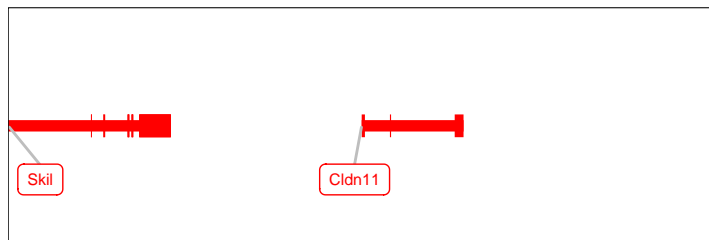

Genes

chr18:82425122-82525123

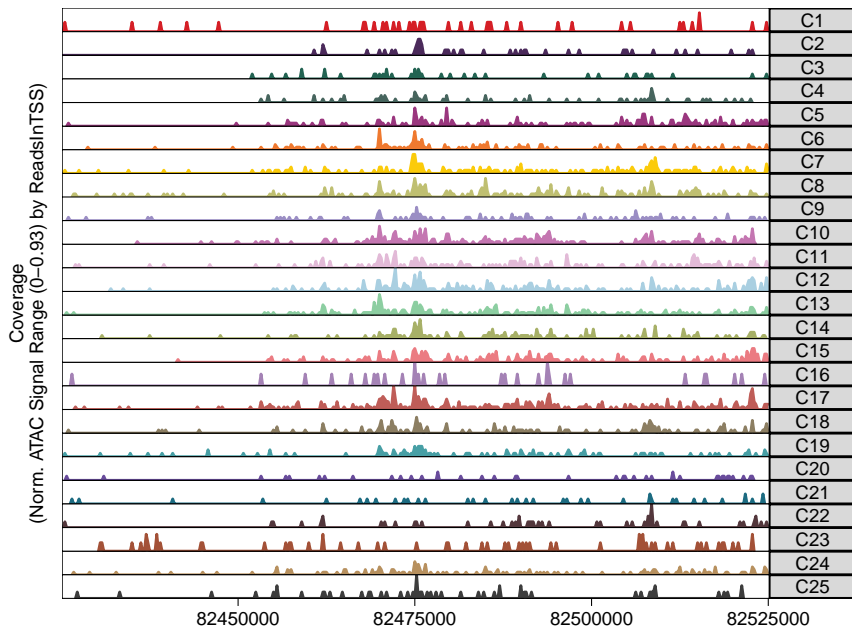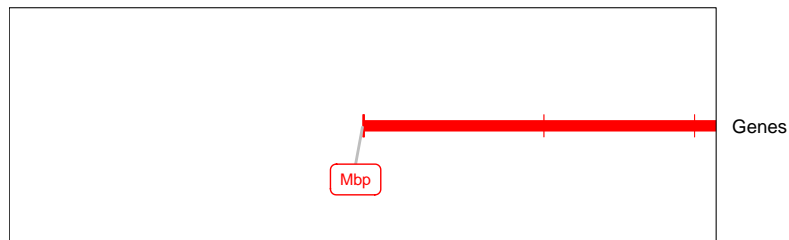

chr11:100524938–100624939

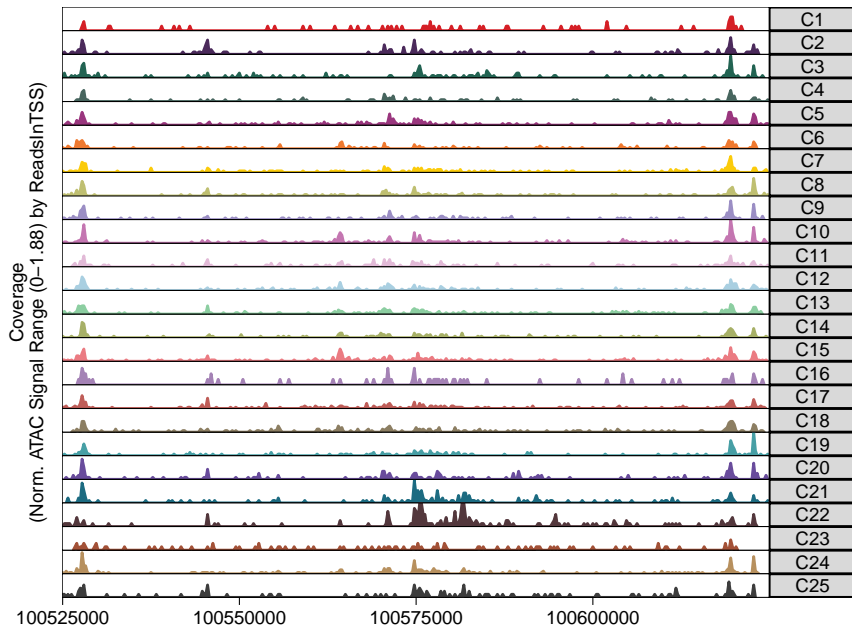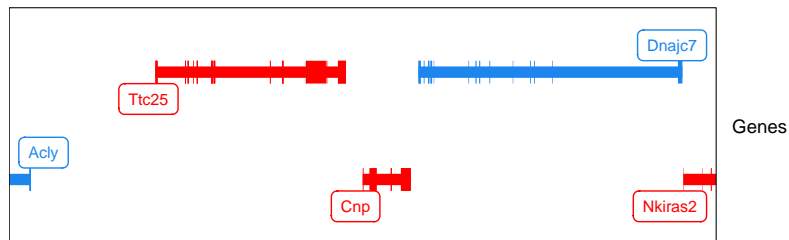



chr15:79114505-79214506

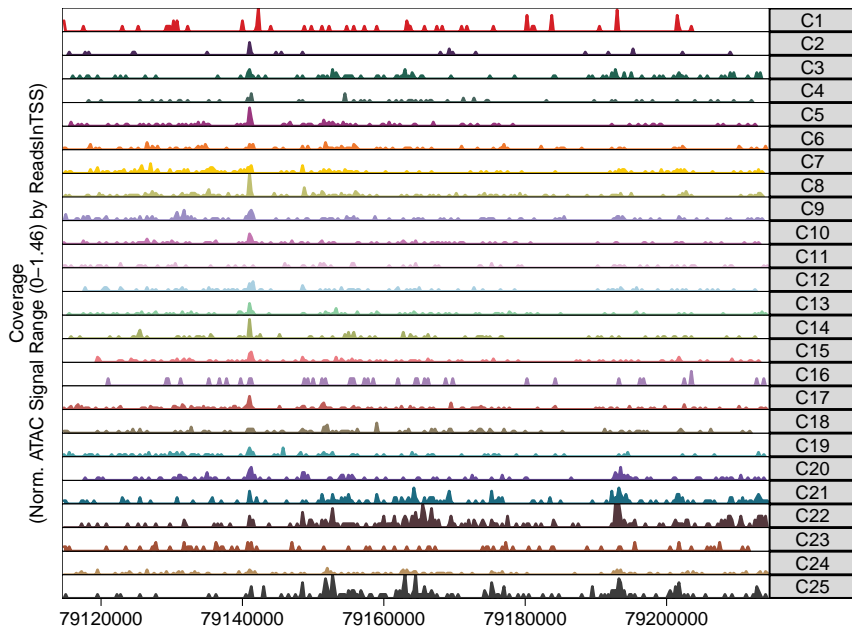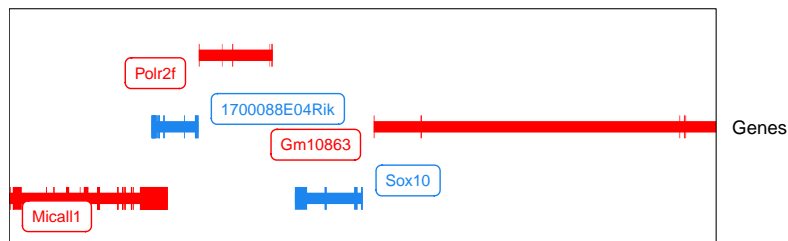

chr5:75102290-75202291

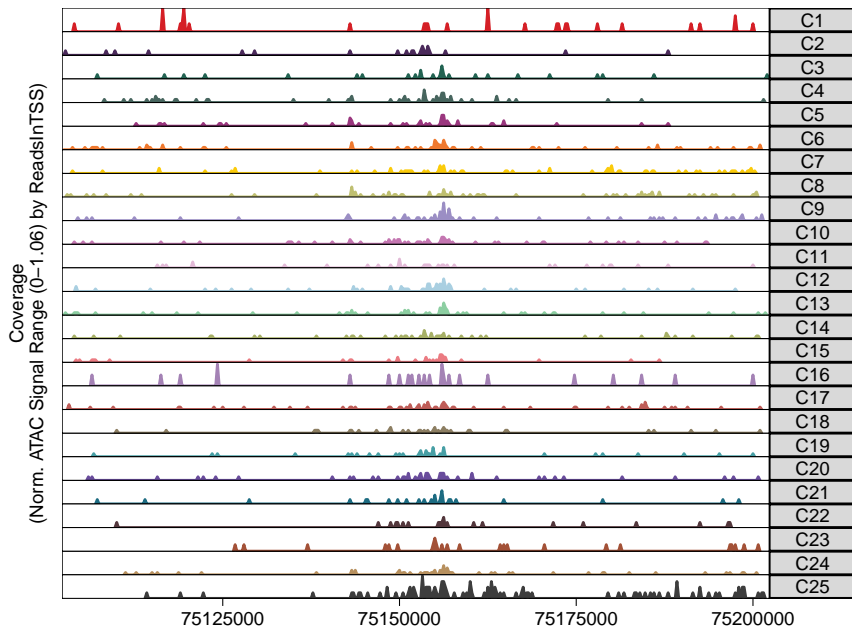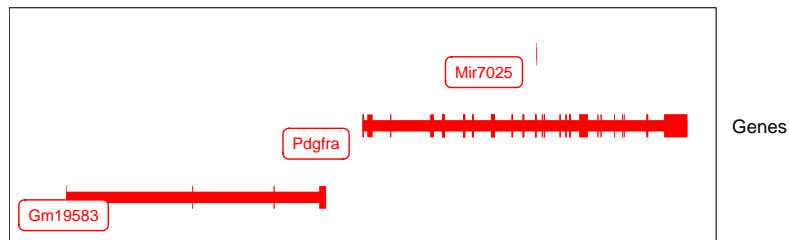

chr16:91175549–91275550

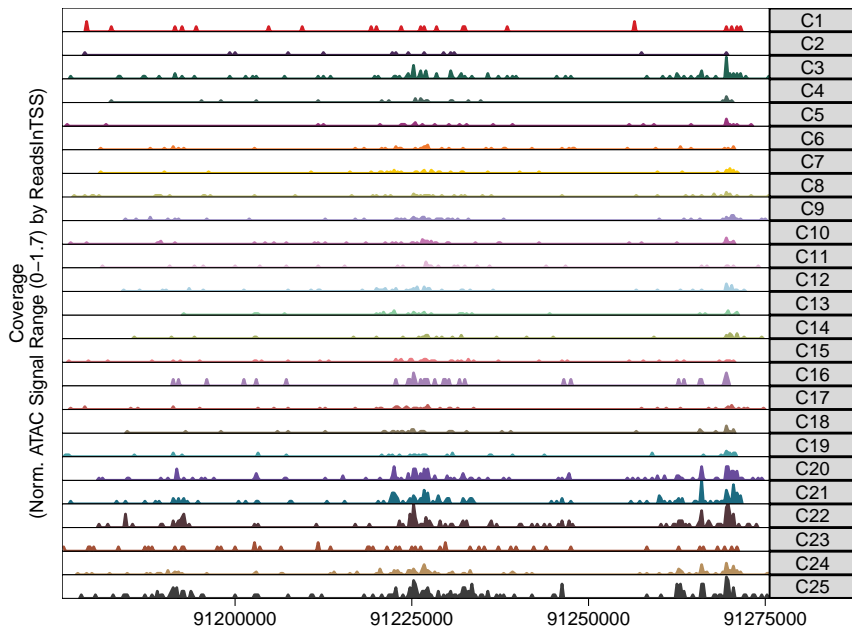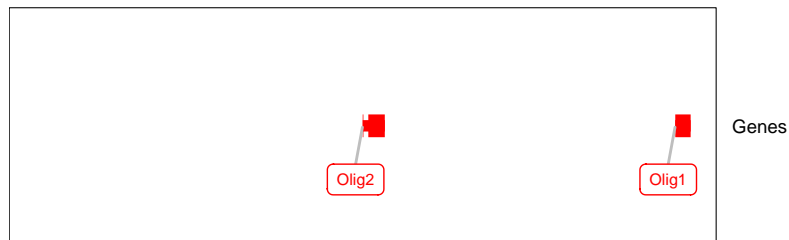

chr5:75928427-76028428

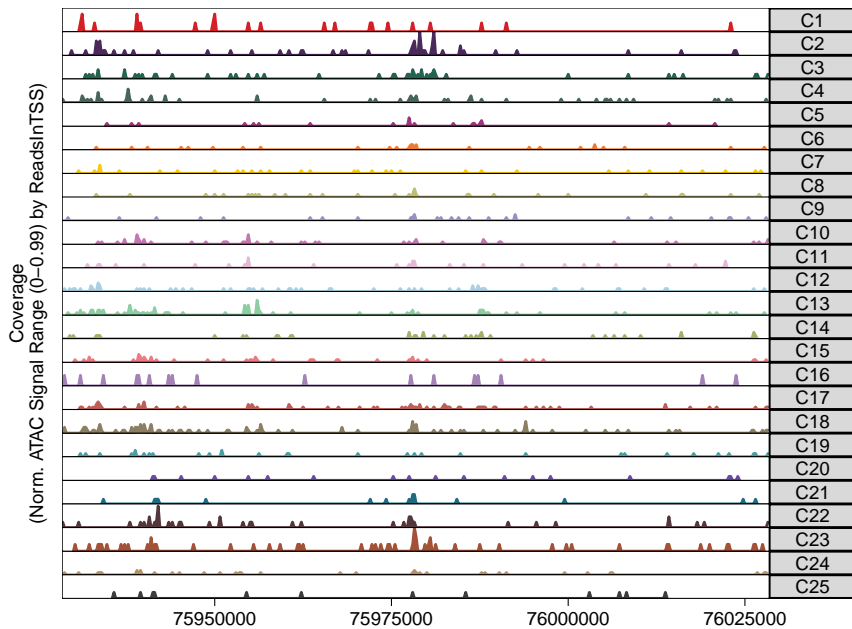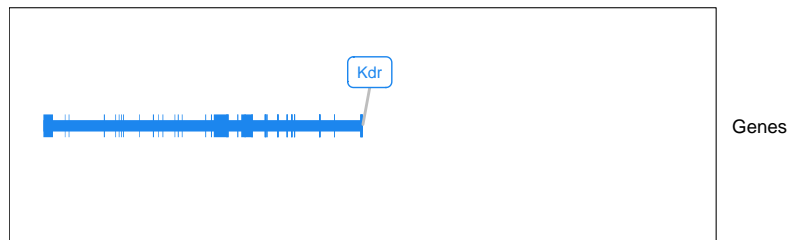

chr5:147675987-147775988

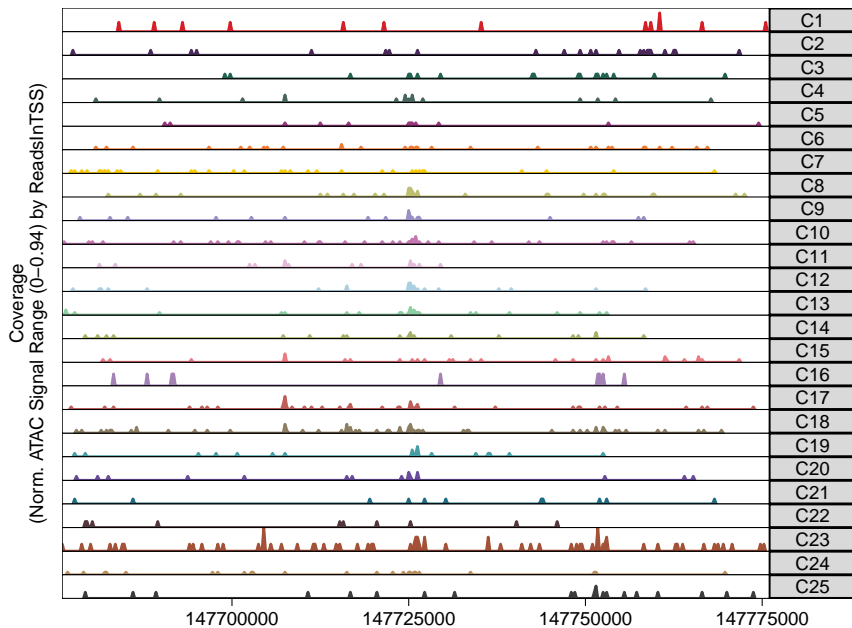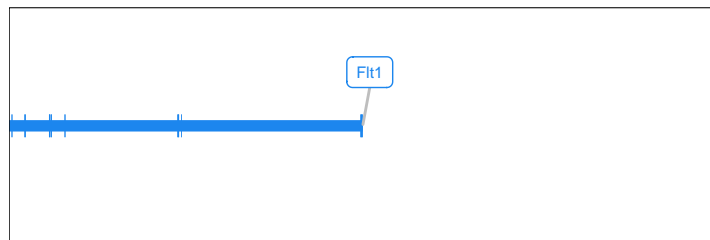

Genes

chr16:18726846-18826847

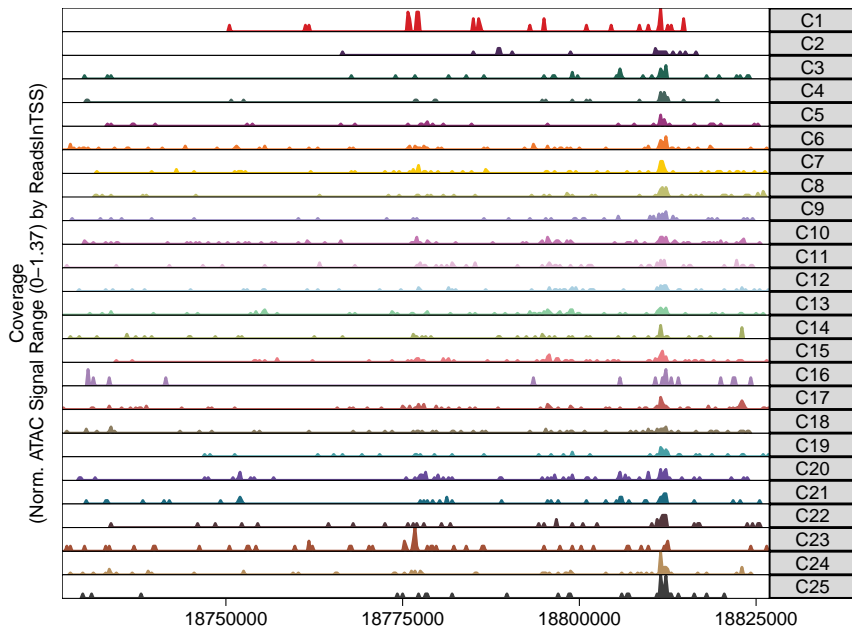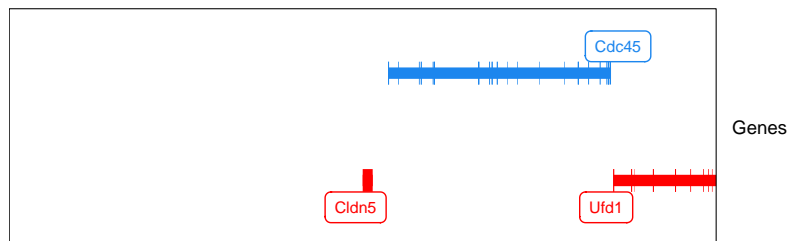

chr11:102847199-102947200

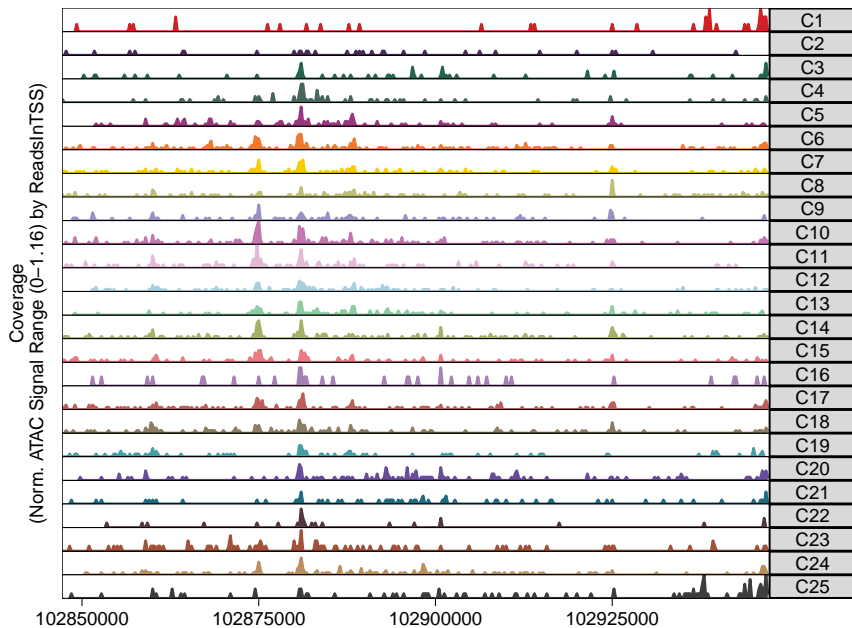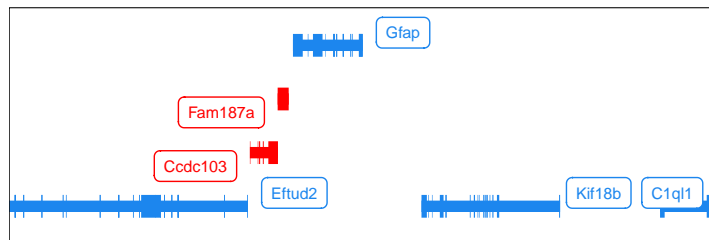

Genes

chr1:153849928-153949929

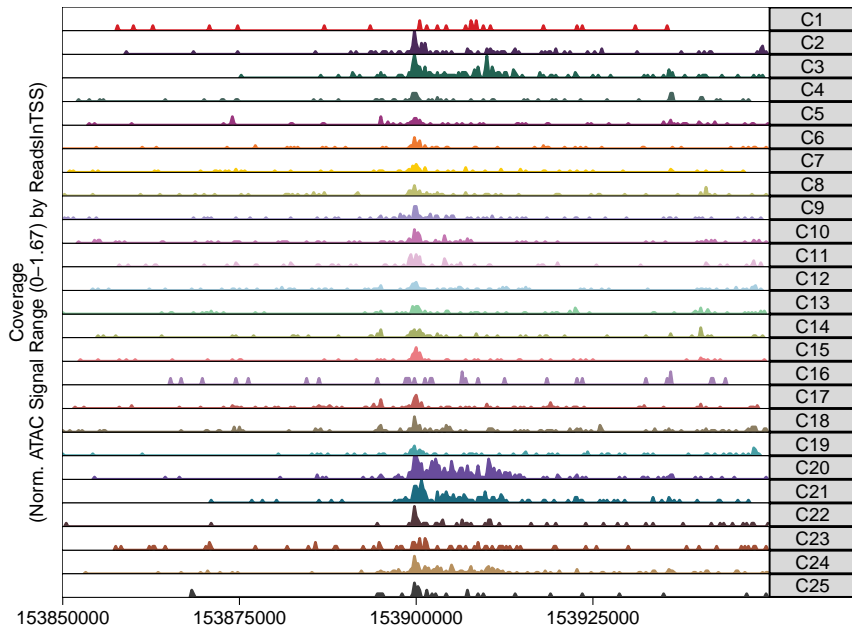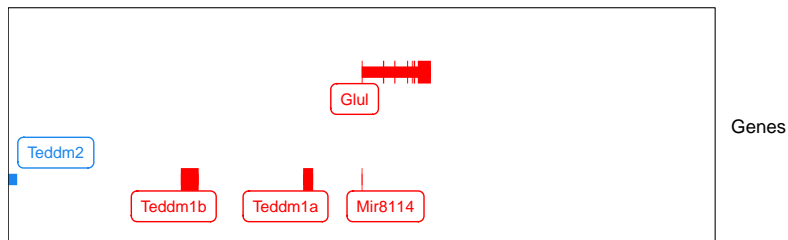



chr8:124519706–124619707

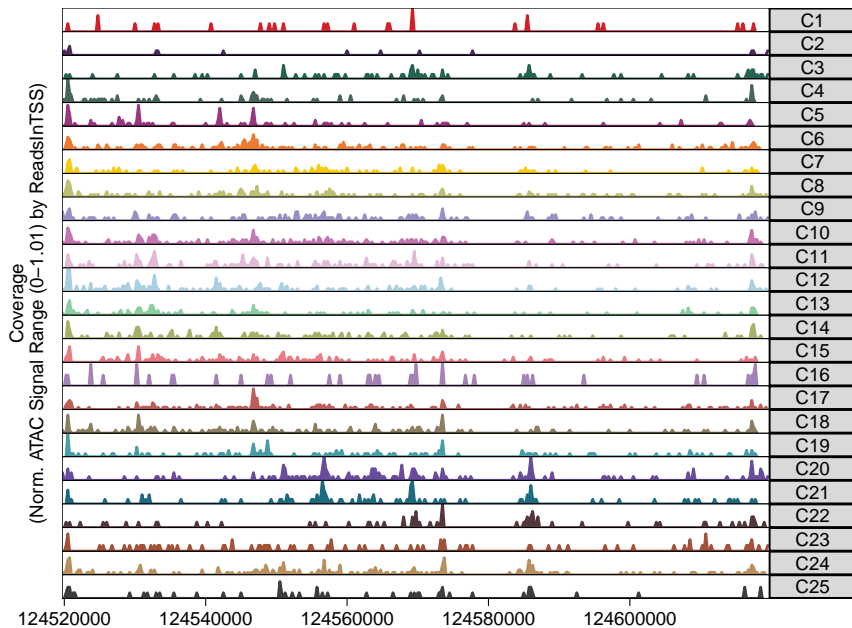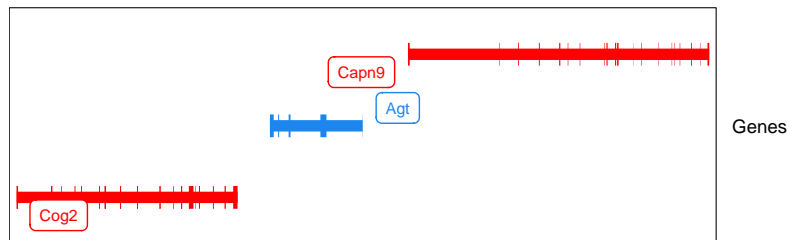

chr4:143249563–143349564

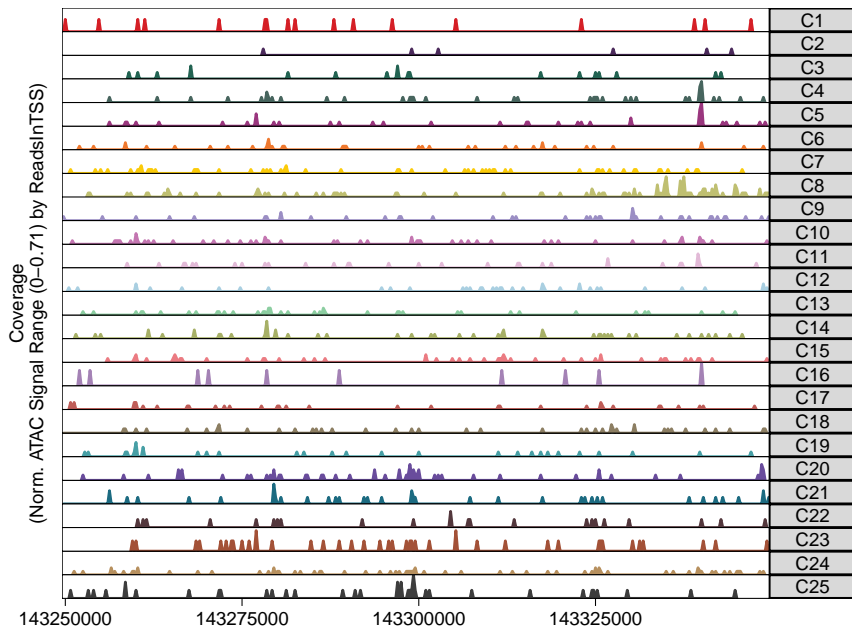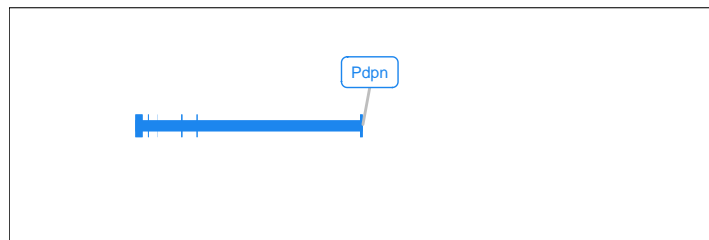

Genes

chr10:56327272-56427273

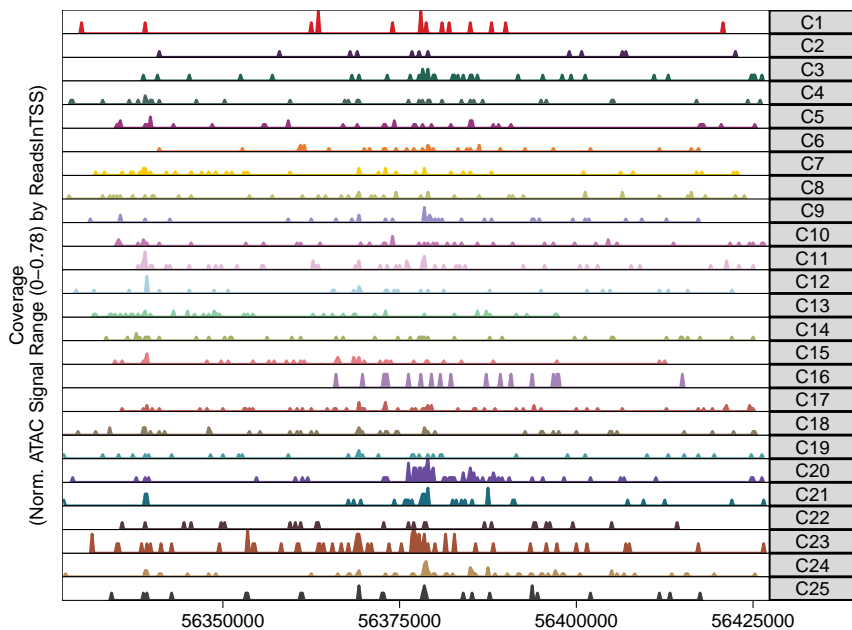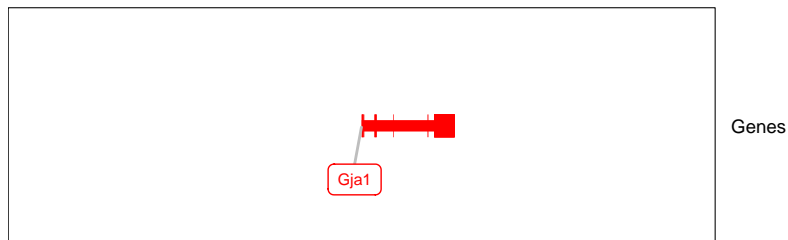

chr18:15360981-15460982

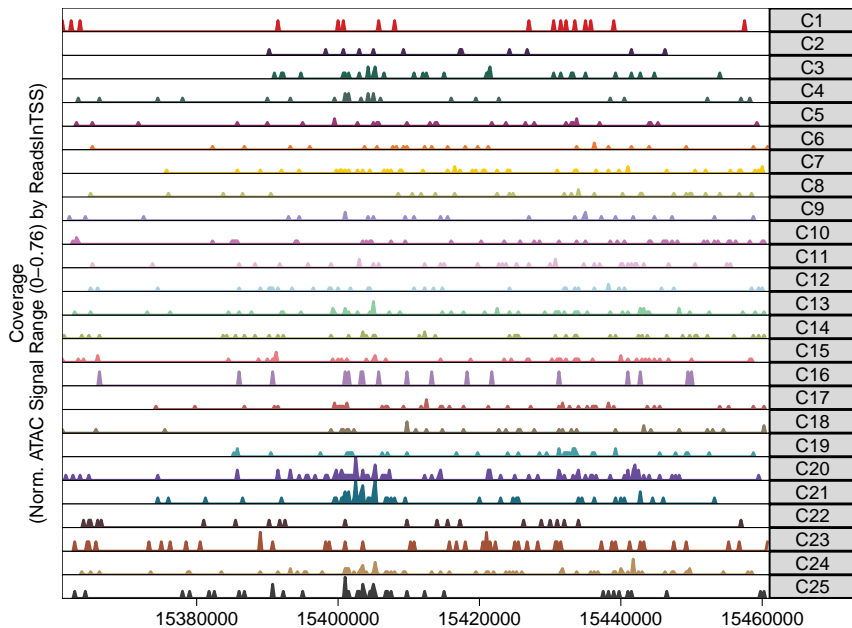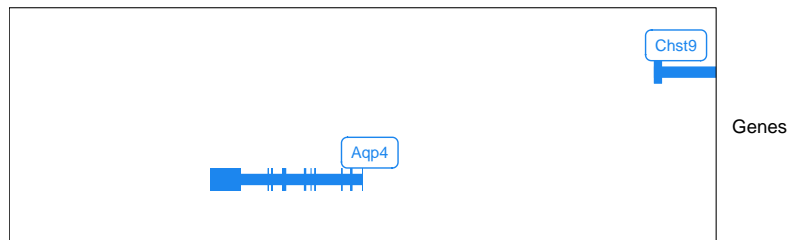

chr12:16603469–16703470

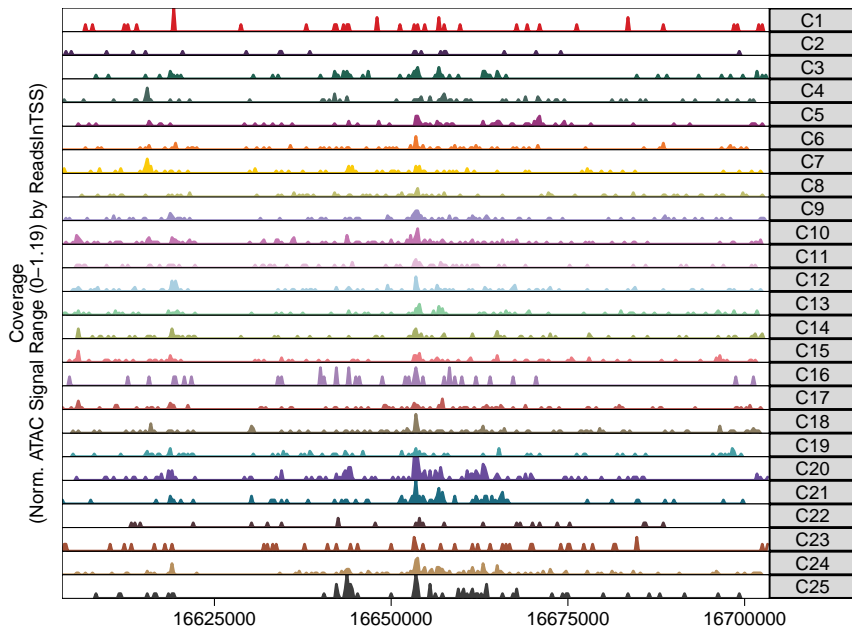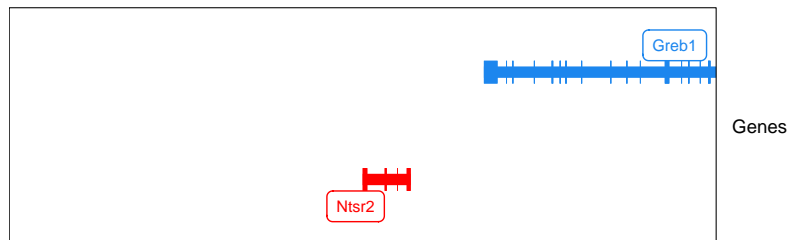

chr4:136848843-136948844

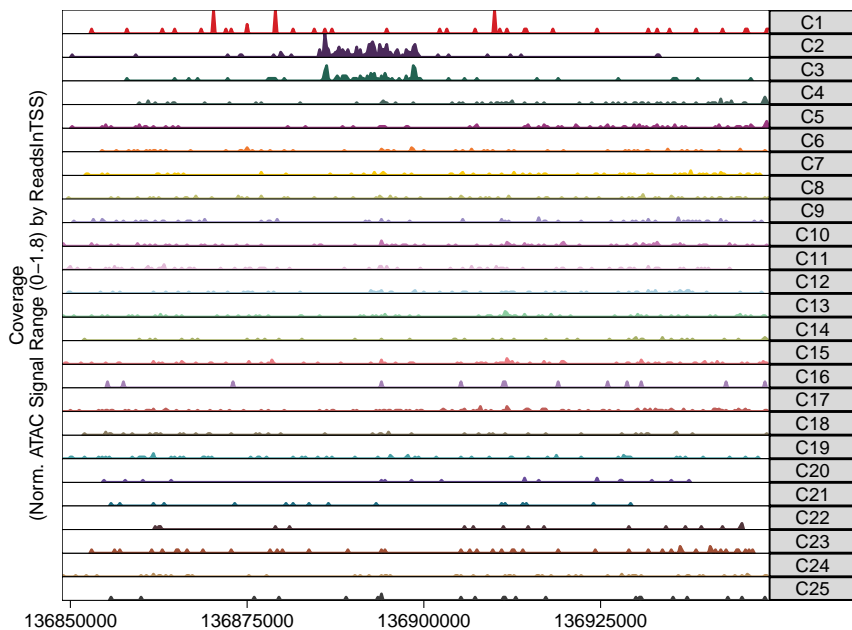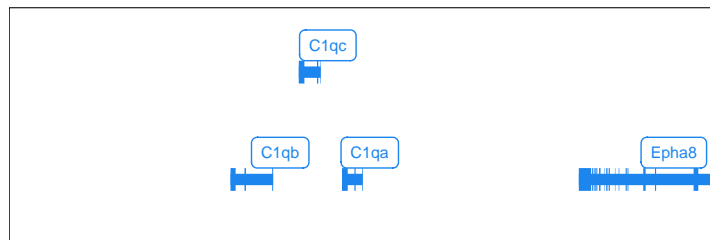

Genes

chr4:136842913-136942914

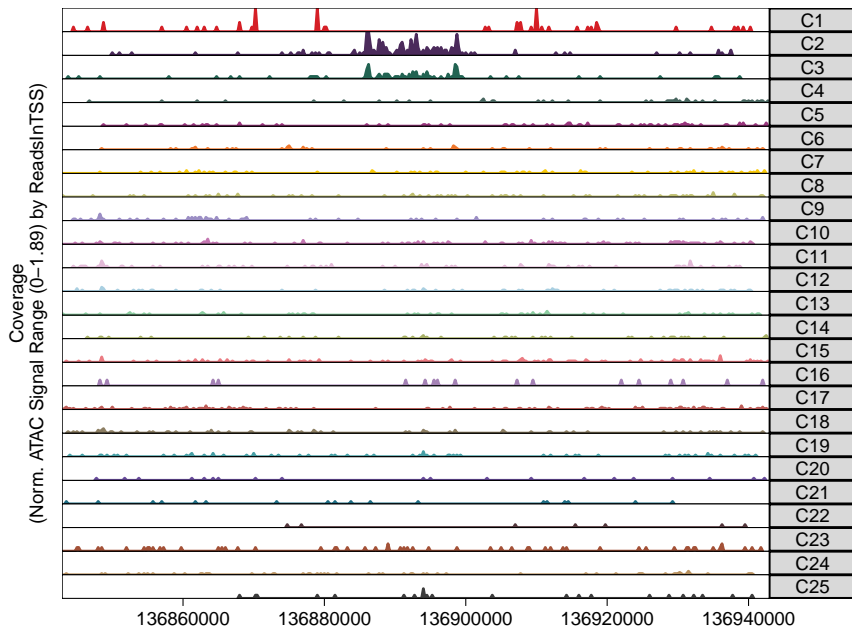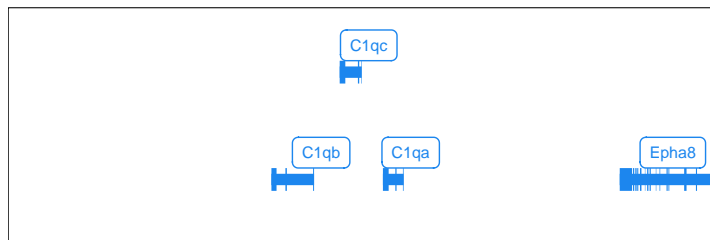

Genes

chr9:120018295–120118296

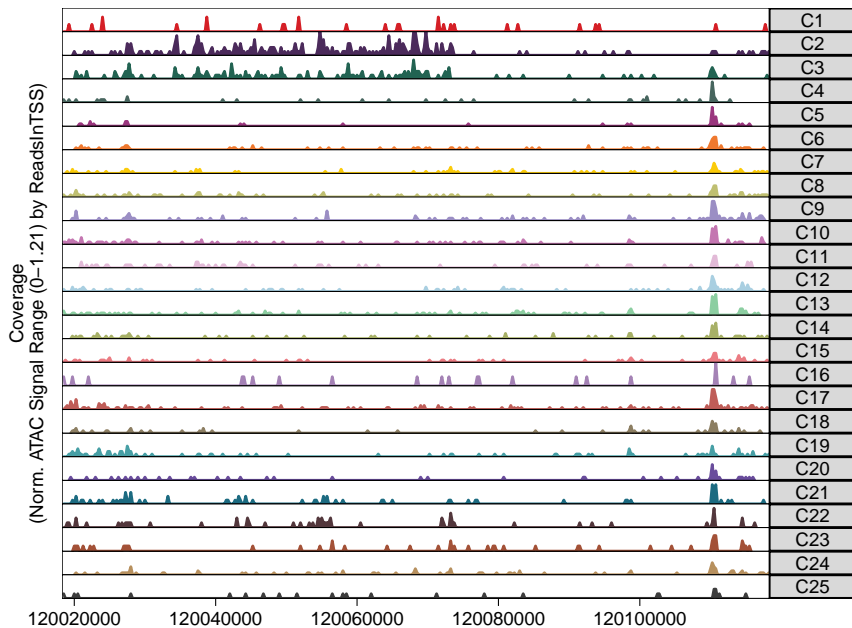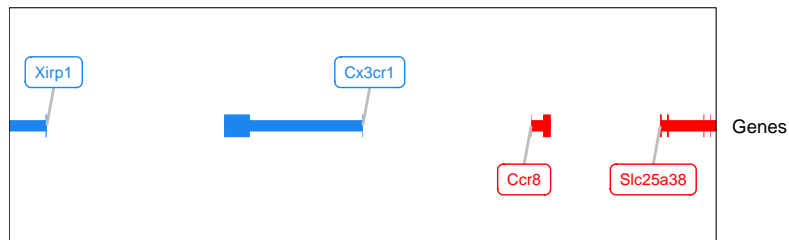



chr2:14179413–14279414

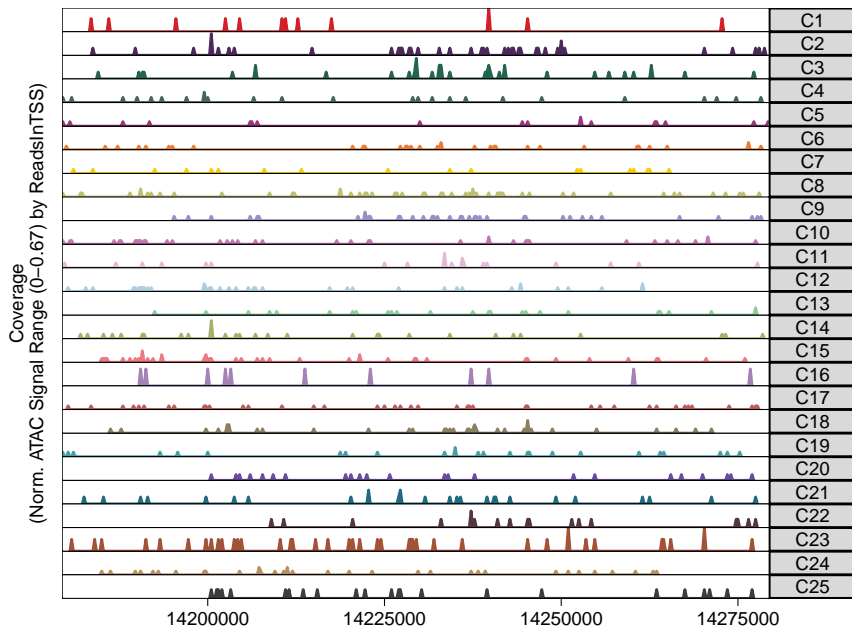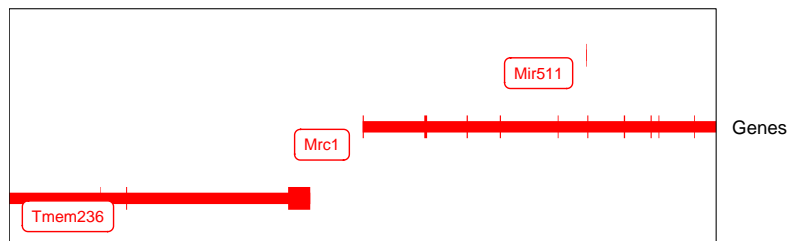

chr3:95476785-95576786

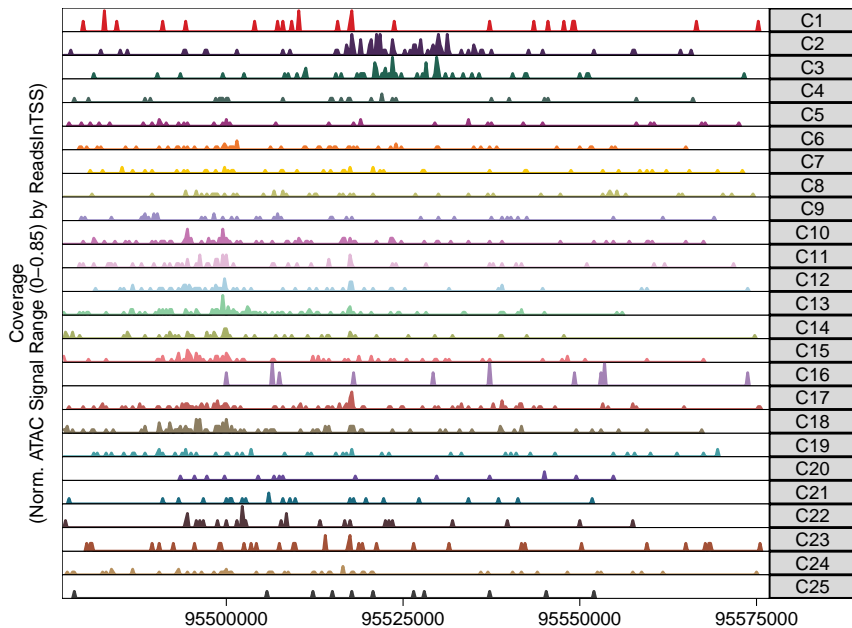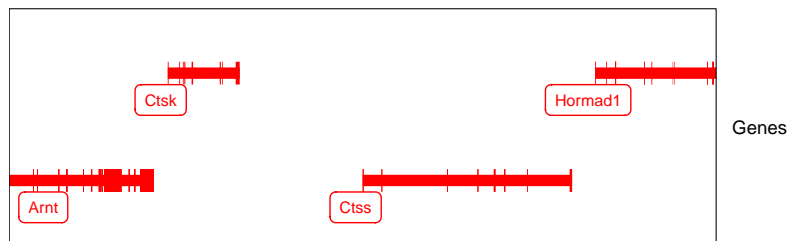

chr7:30363787-30463788

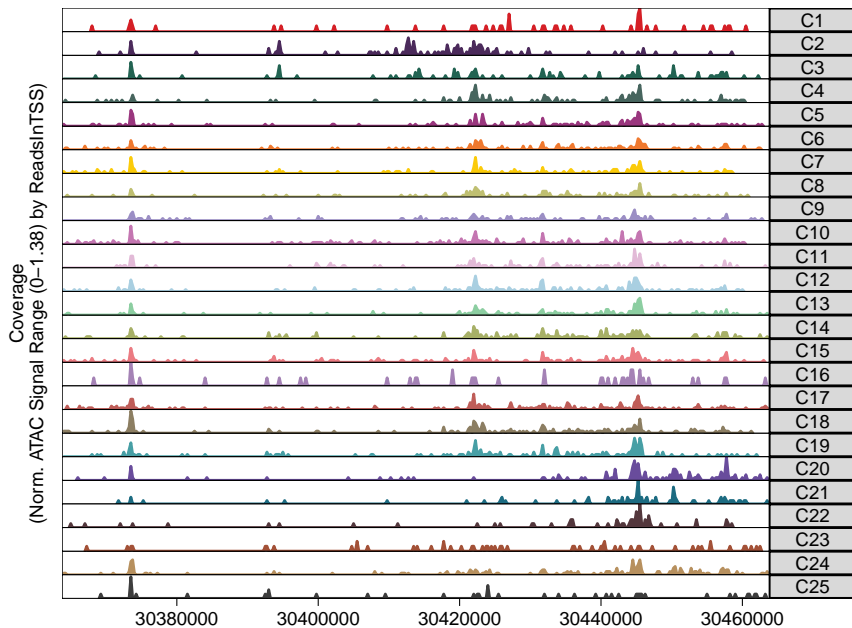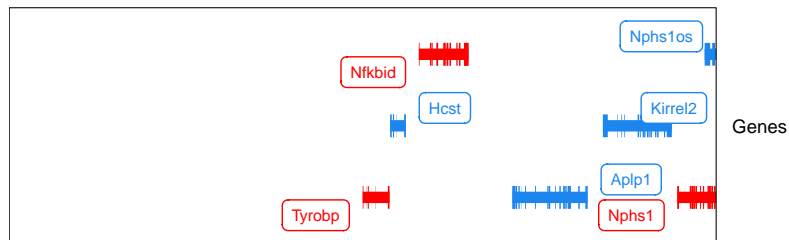

chr1:5538492-5638493

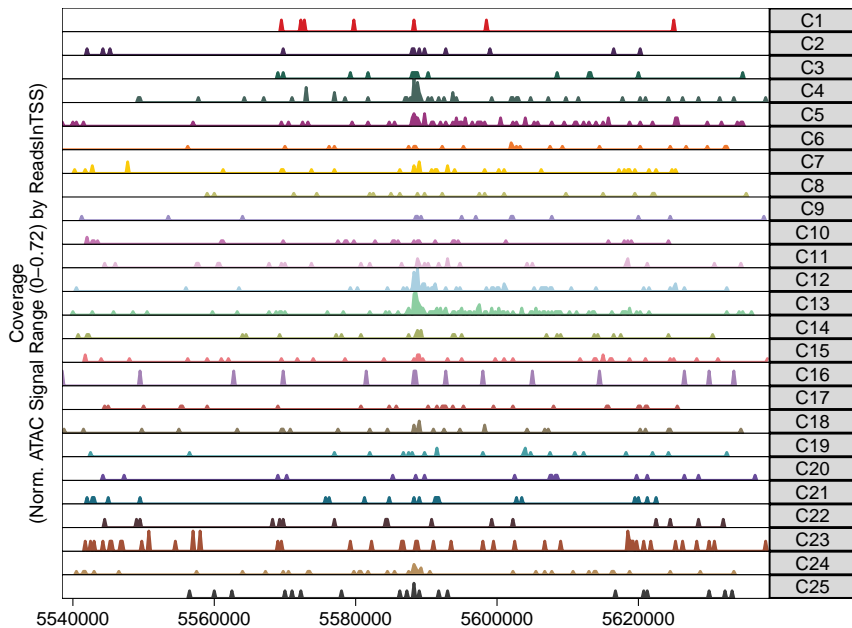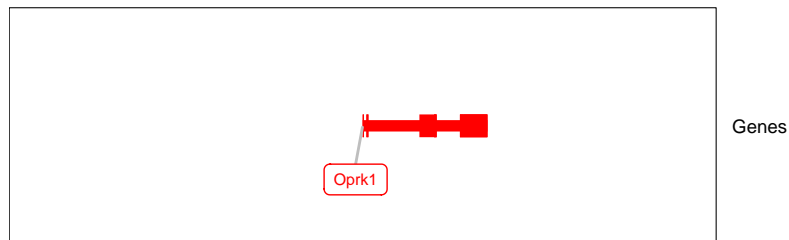

chr1:19158913–19258914

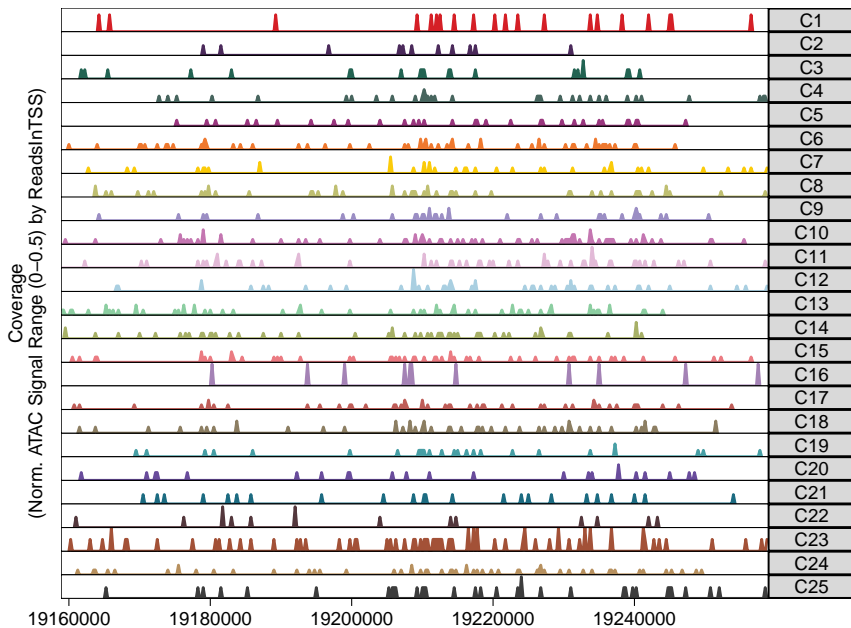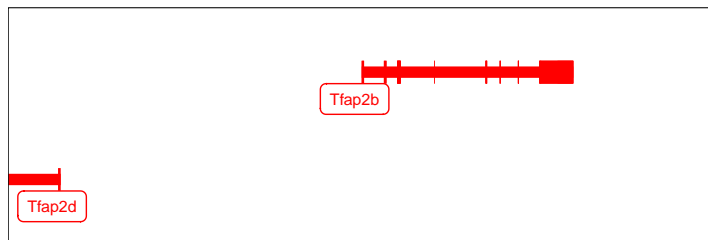

Genes

chr2:136007926-136107927

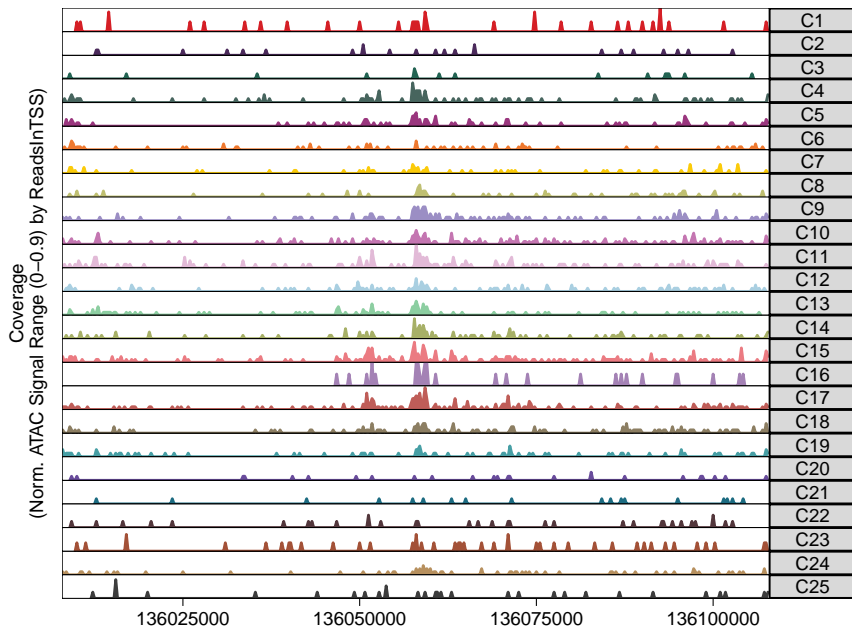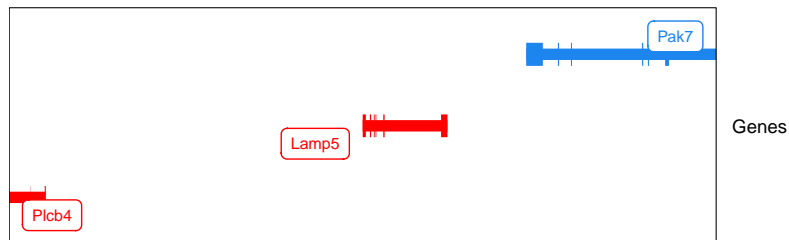

chr14:12295864-12395865

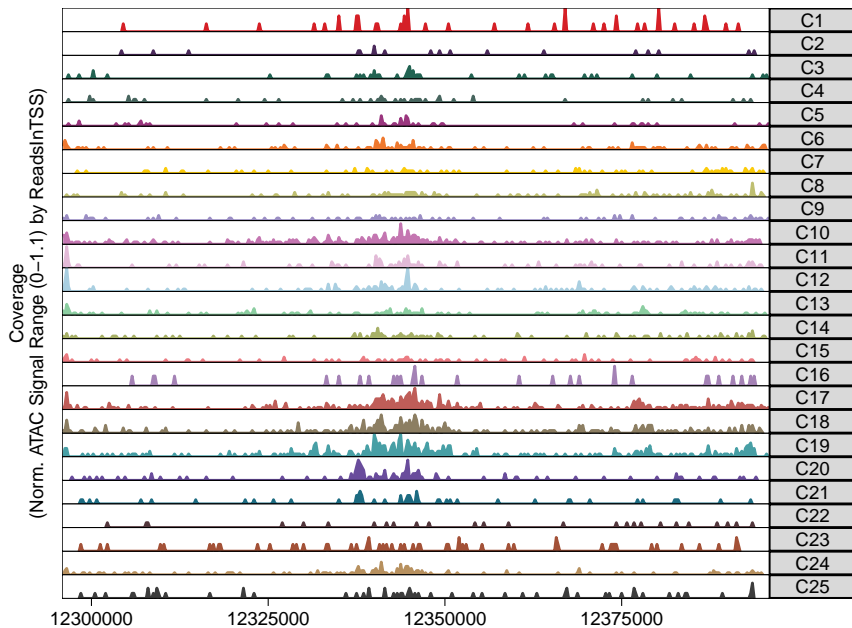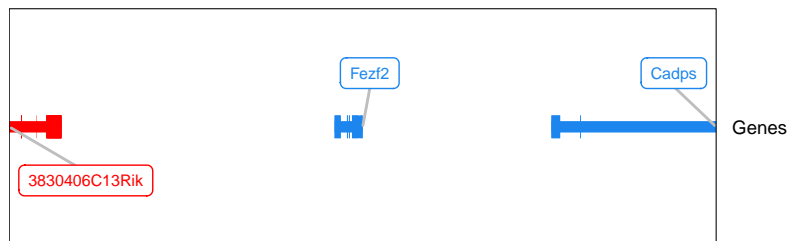

chr1:12642429-12742430

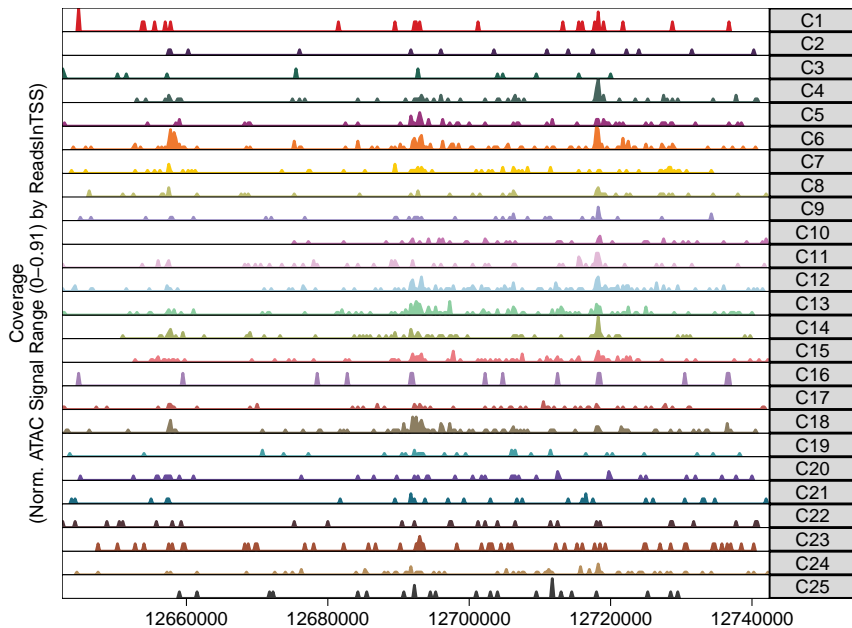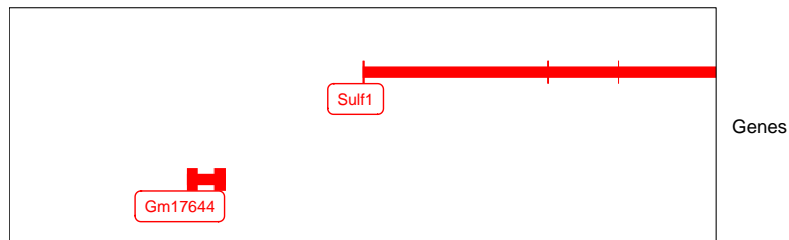



chr7:45113920-45213921

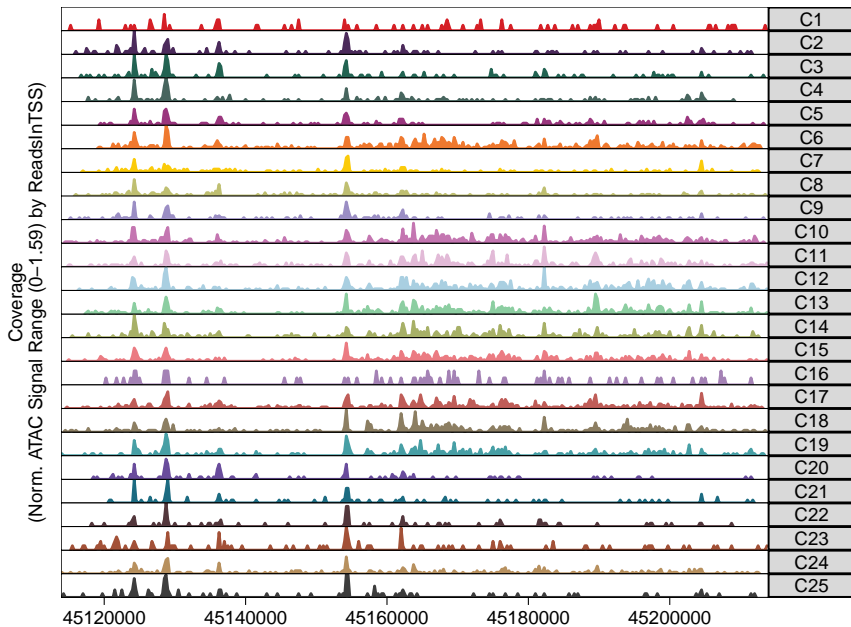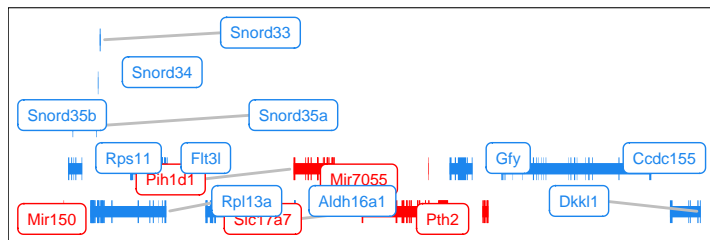

Genes

chr1:24537436-24637437

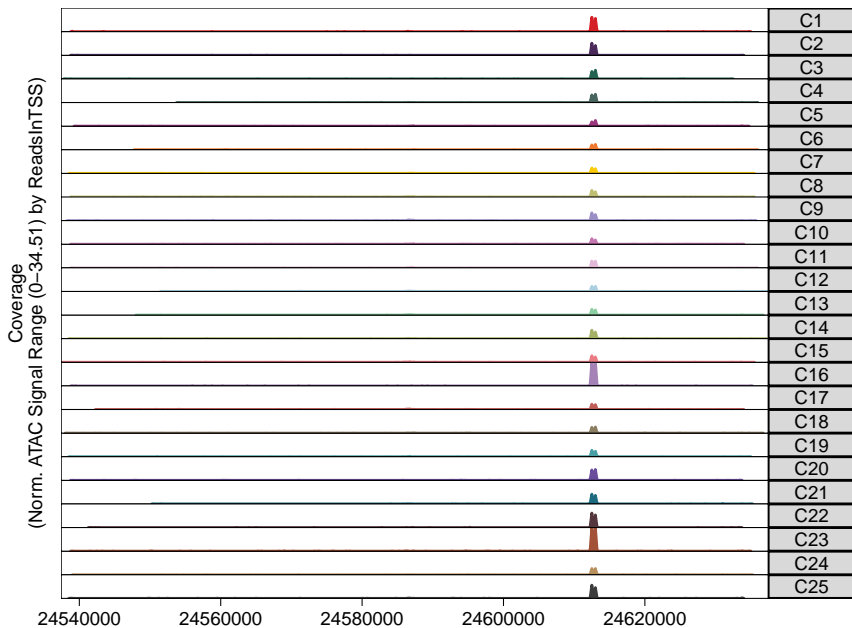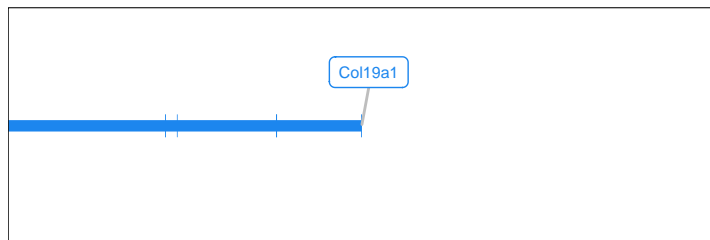

Genes

chr7:112109056-112209057

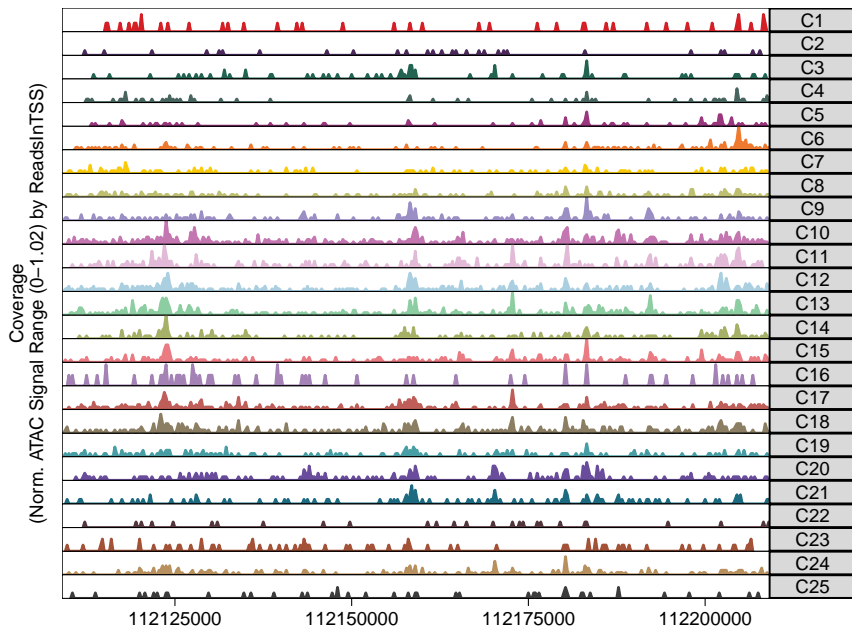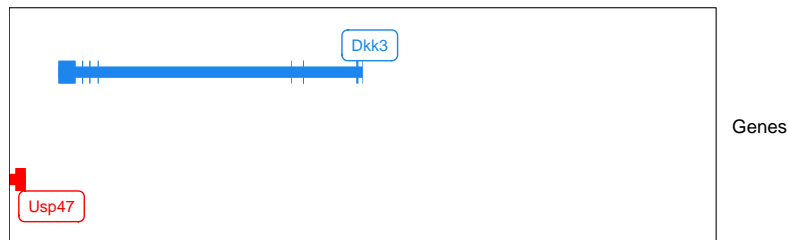

chr5:73288946–73388947

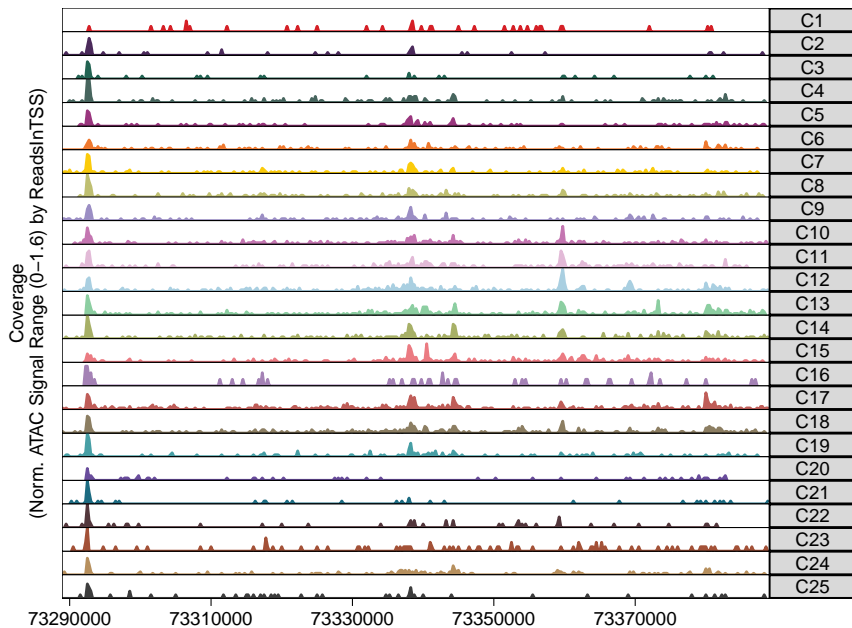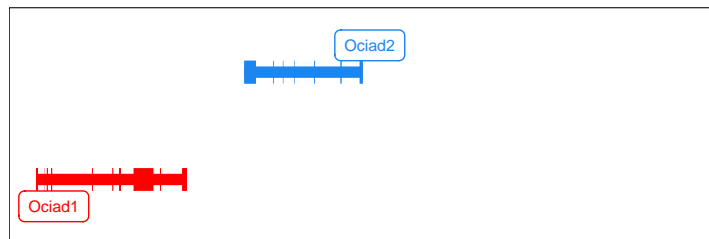

Genes

chr19:19061195–19161196

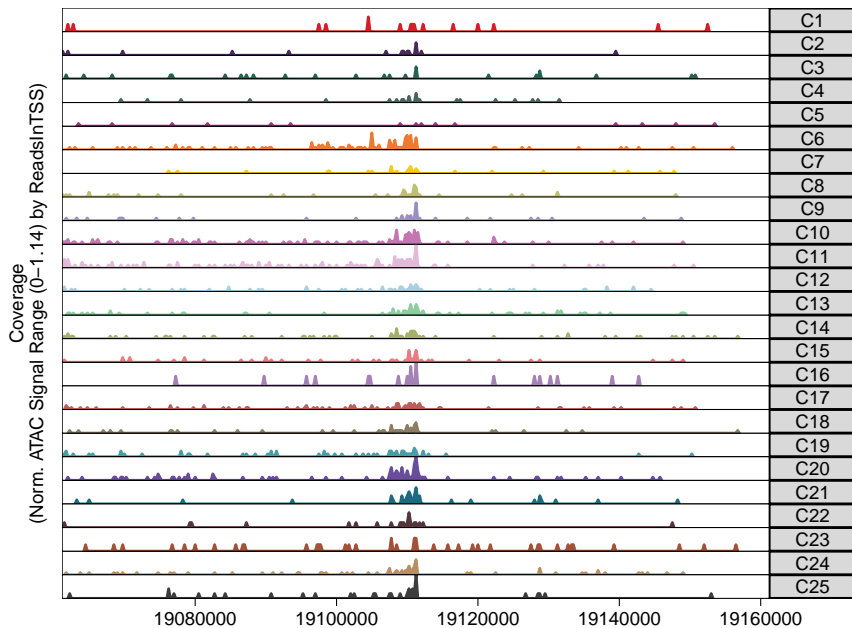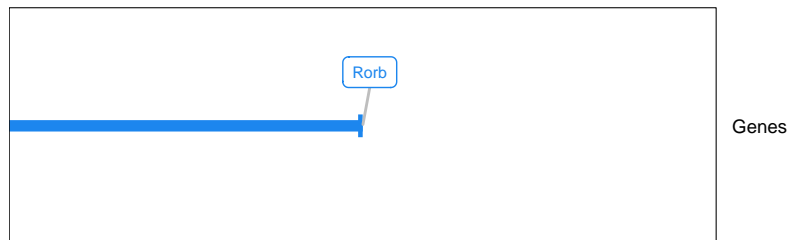

chr6:14851348–14951349

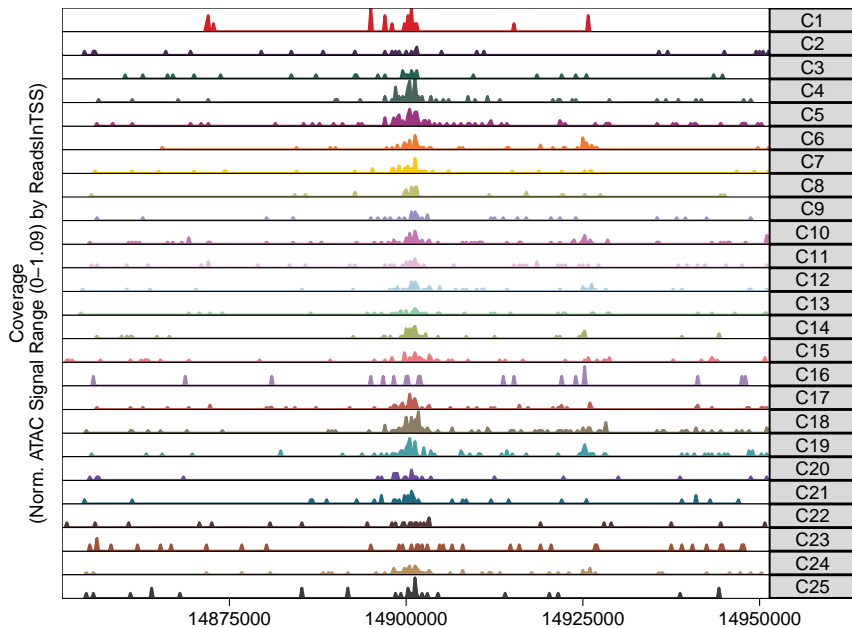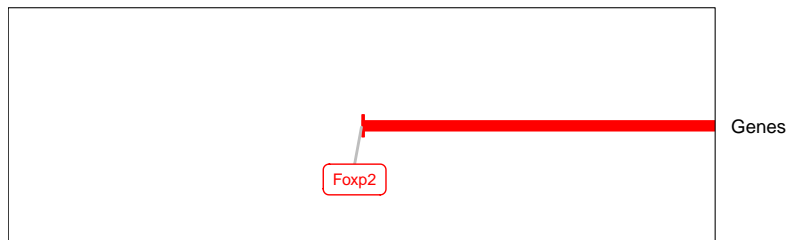

chr2:70512128–70612129

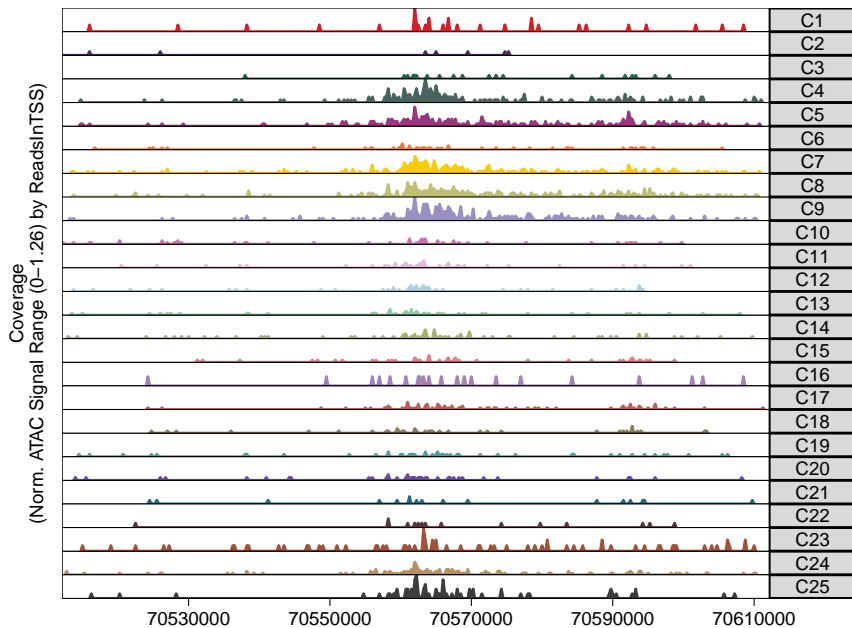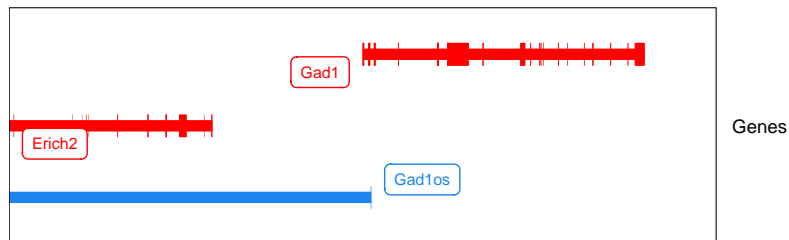

chr2:22572326-22672327

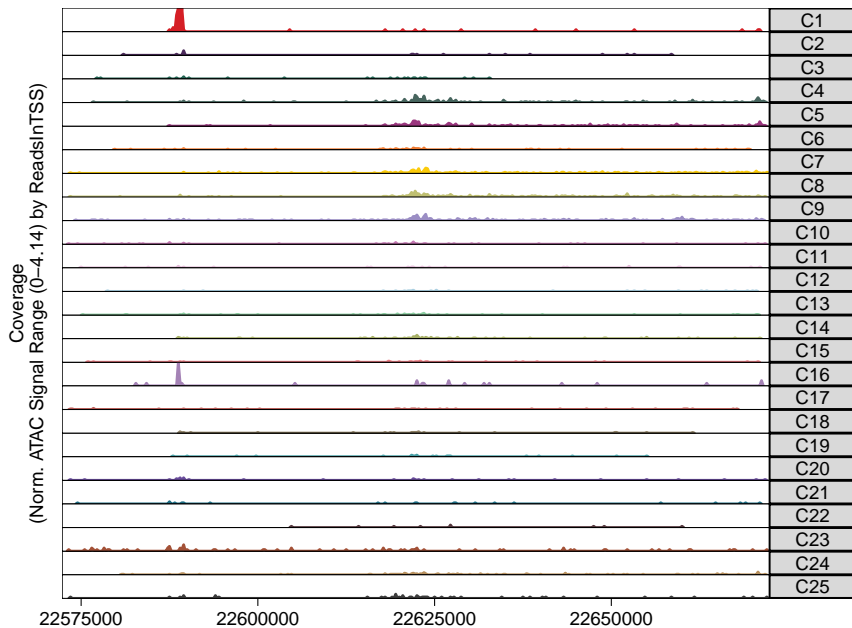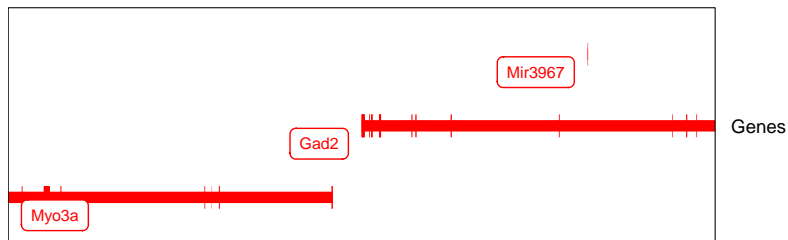



chr15:78156350-78256351

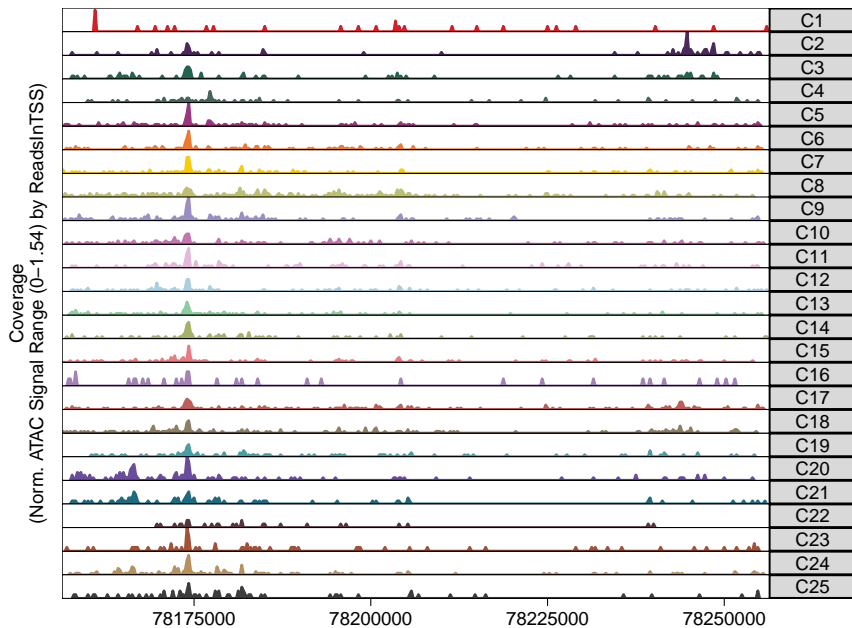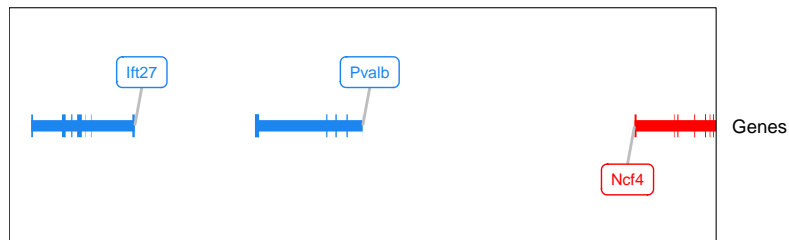

chr2:71479444-71579445

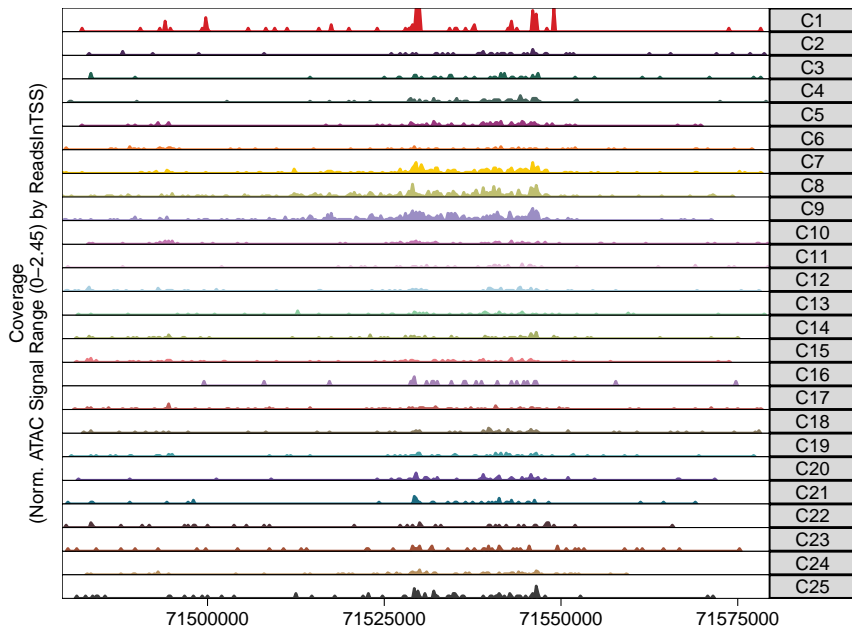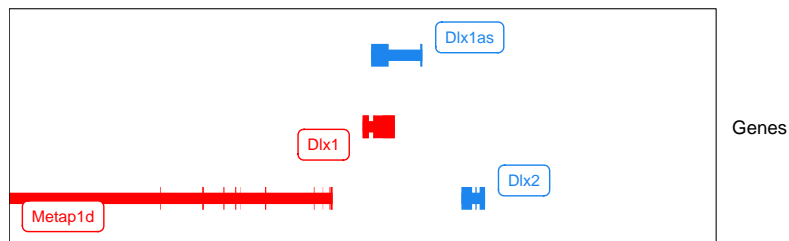

chr2:71496753–71596754

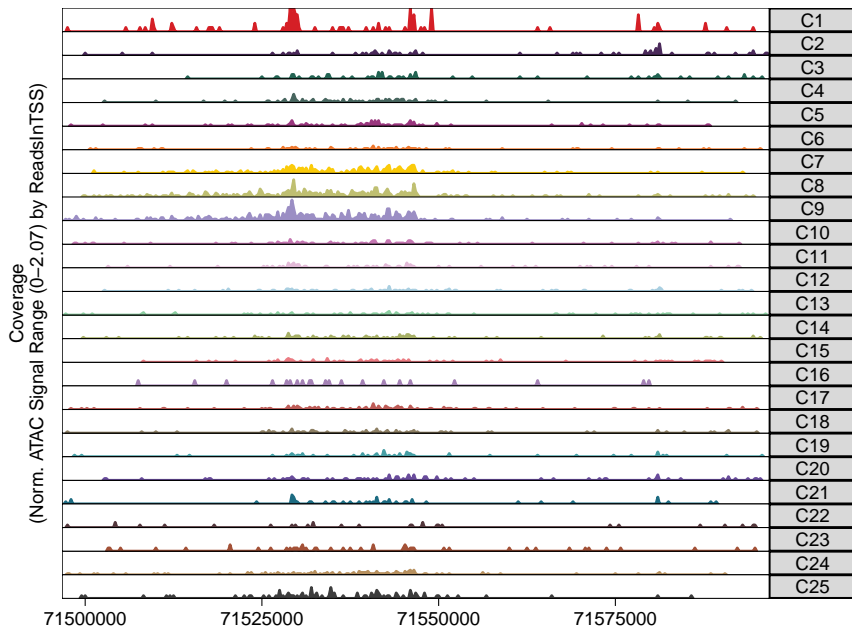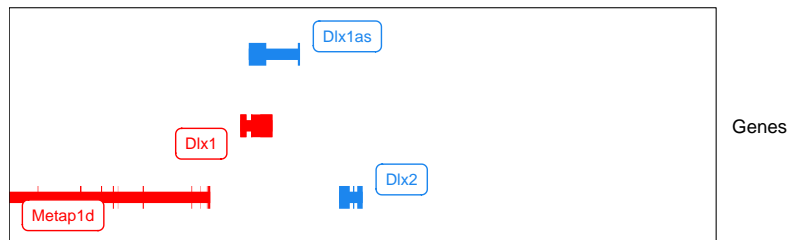

chr16:23840843-23940844

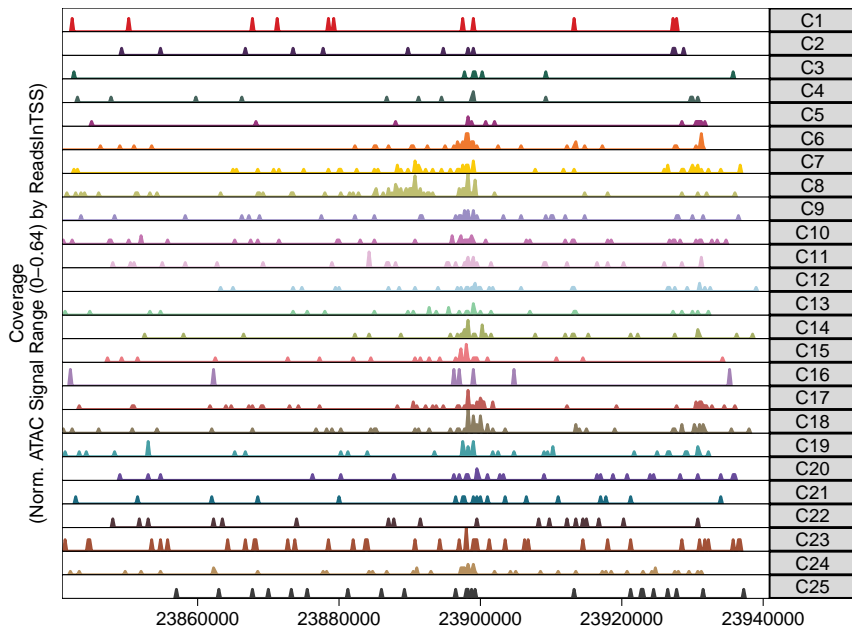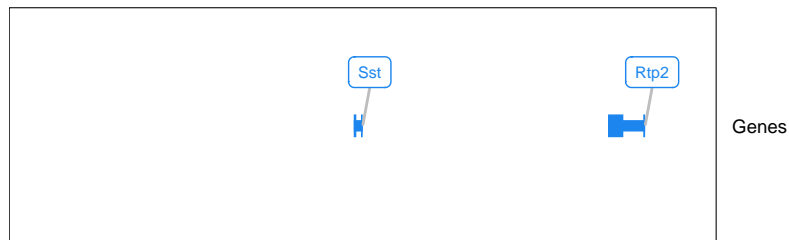

chr10:5589217-5689218

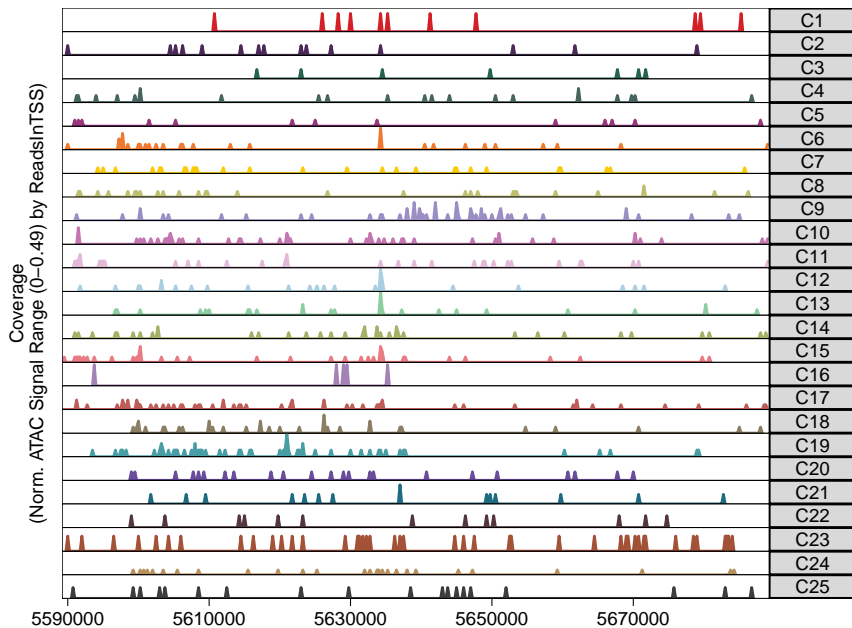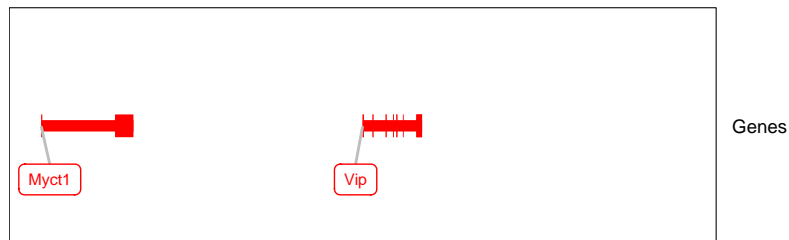

chr2:158560757-158660758

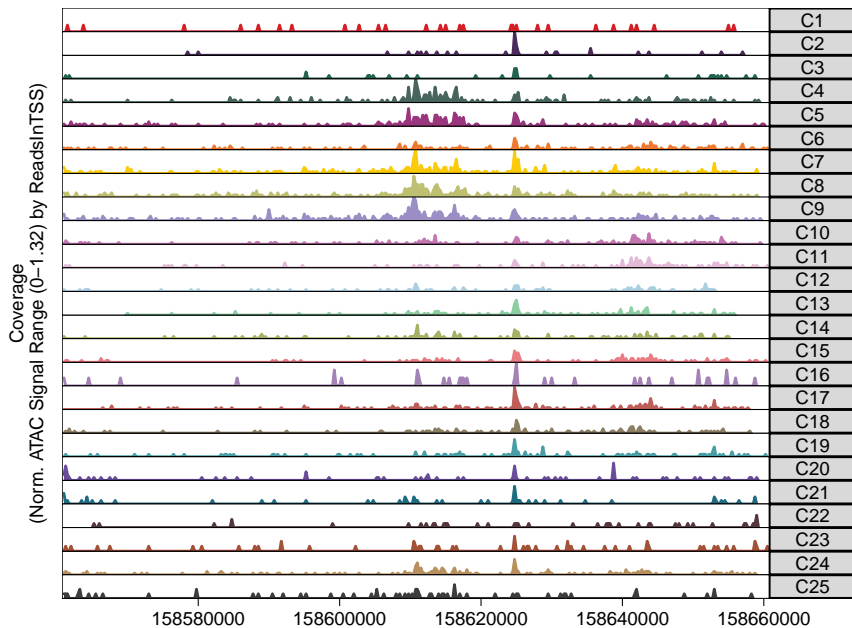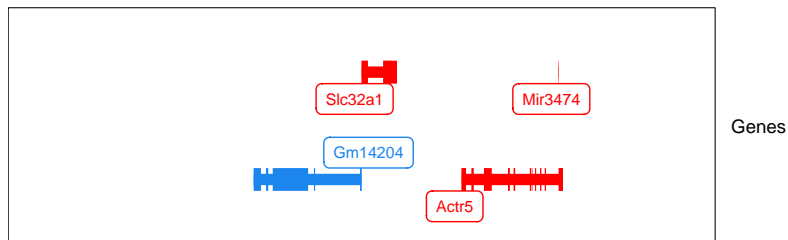

chr16:78880947-78980948

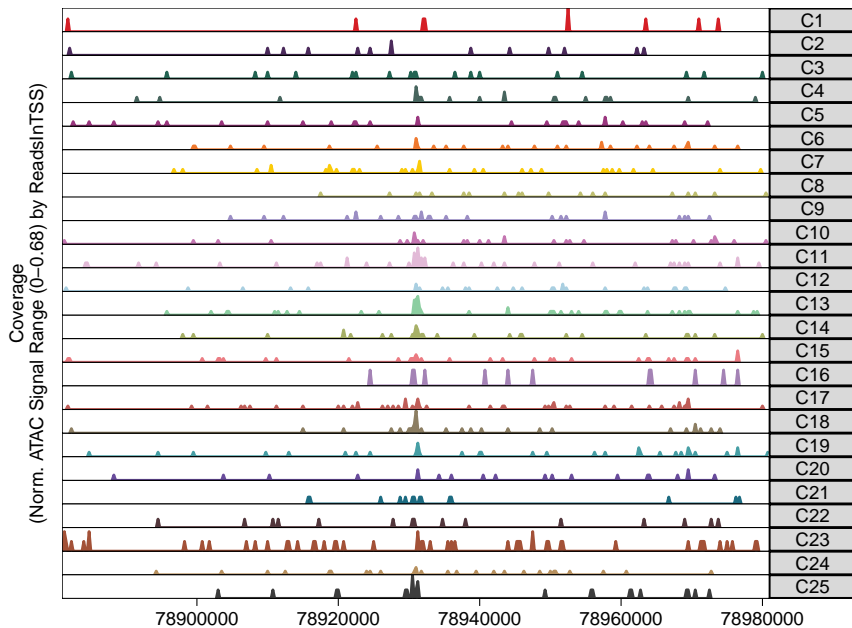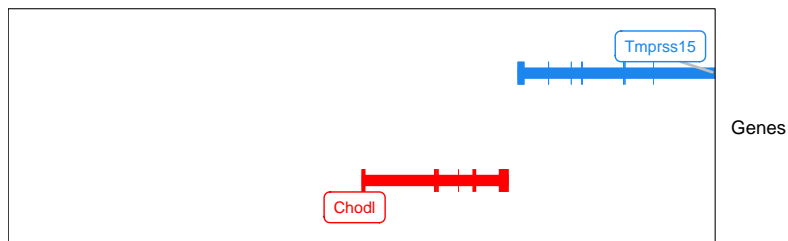

chr2:36055407-36155408

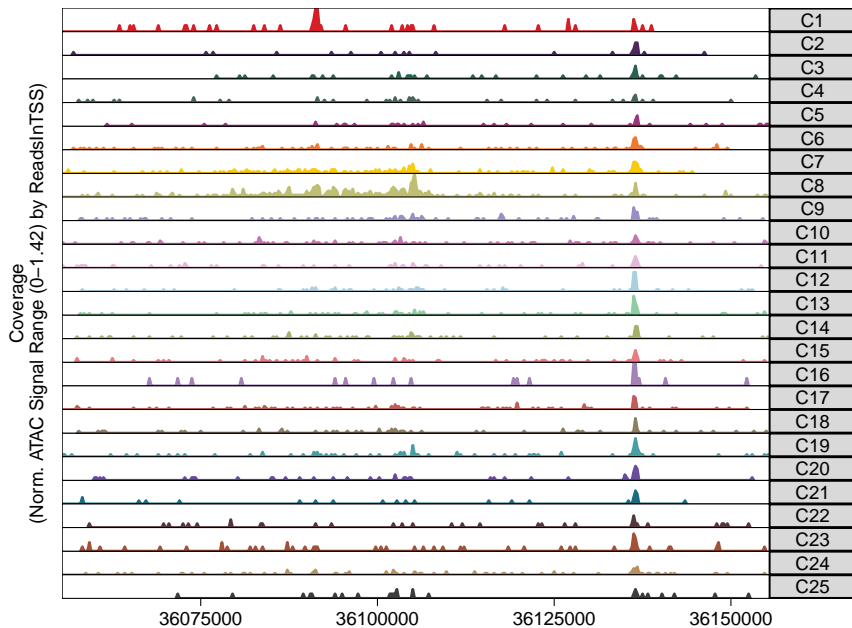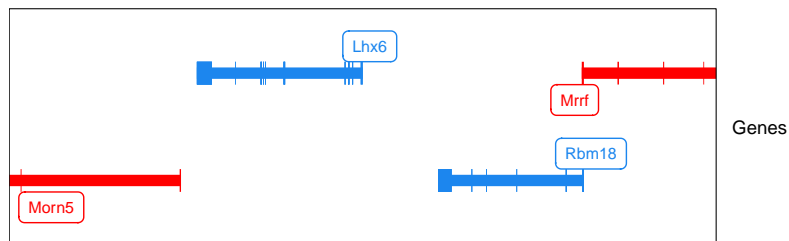



chr6:65621610–65721611

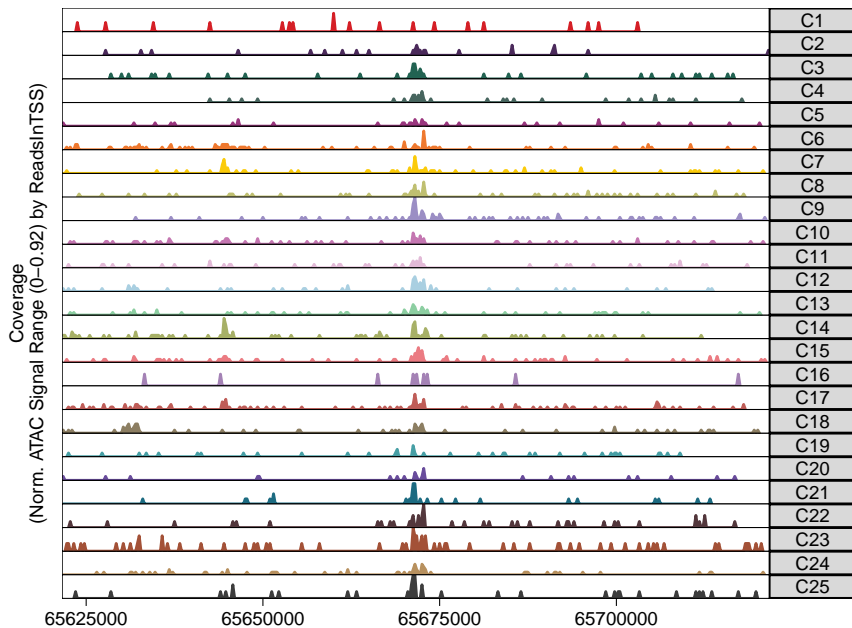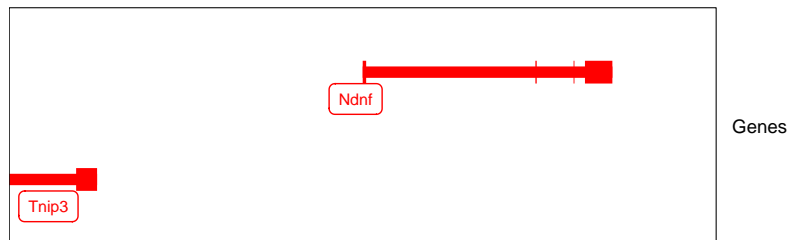

chr14:34324668-34424669

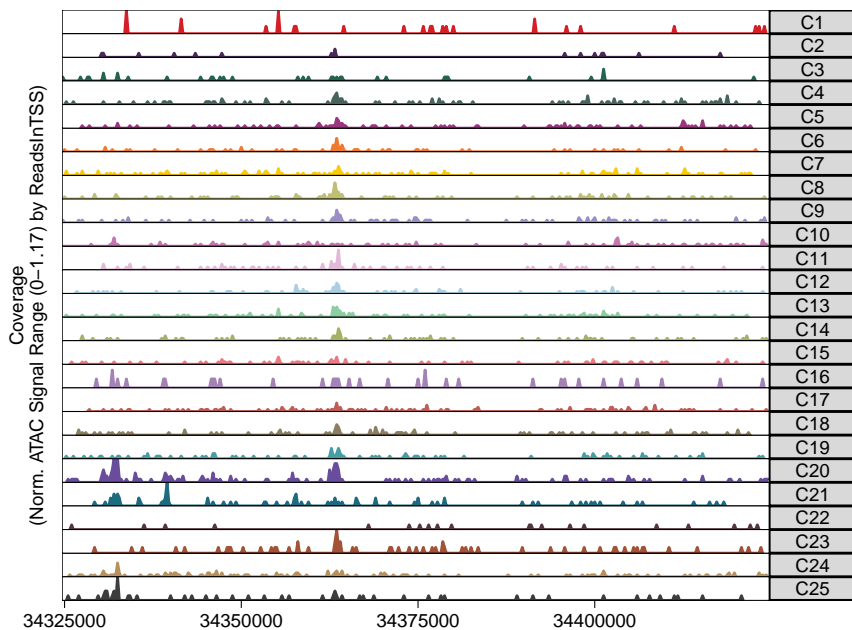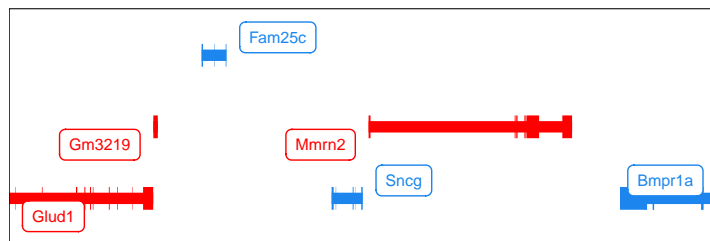

Genes

chr1:78607824-78707825

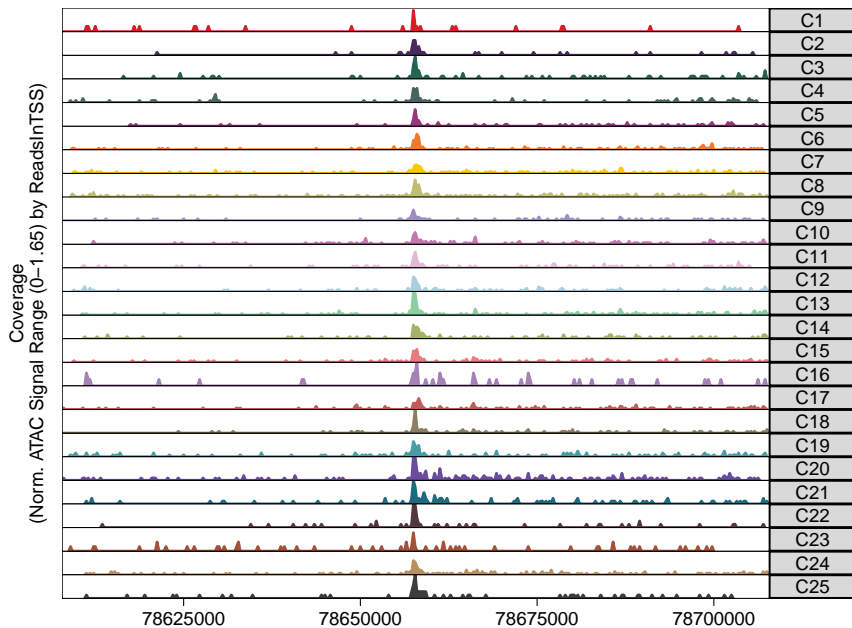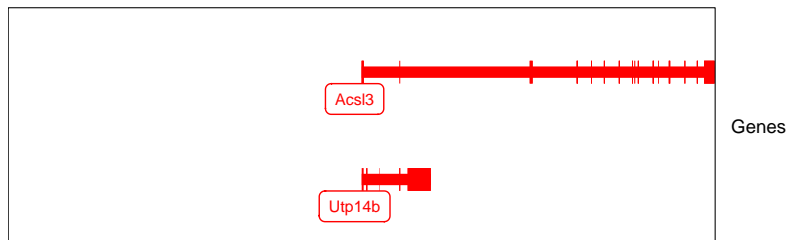

Supplement: Supplemental_File_S1.zip [file Marker Gene Tracks - sciATACv2.pdf › Marker Gene Tracks - sciATACv2.pdf]
