# Supplementary material for: Atlas-scale single-cell chromatin accessibility using nanowell-based combinatorial indexing
Source: HighWire-hosted journal article supplement (doi:10.1101/gr.276655.122), 2023-02-01

chr9:56815103-56915104

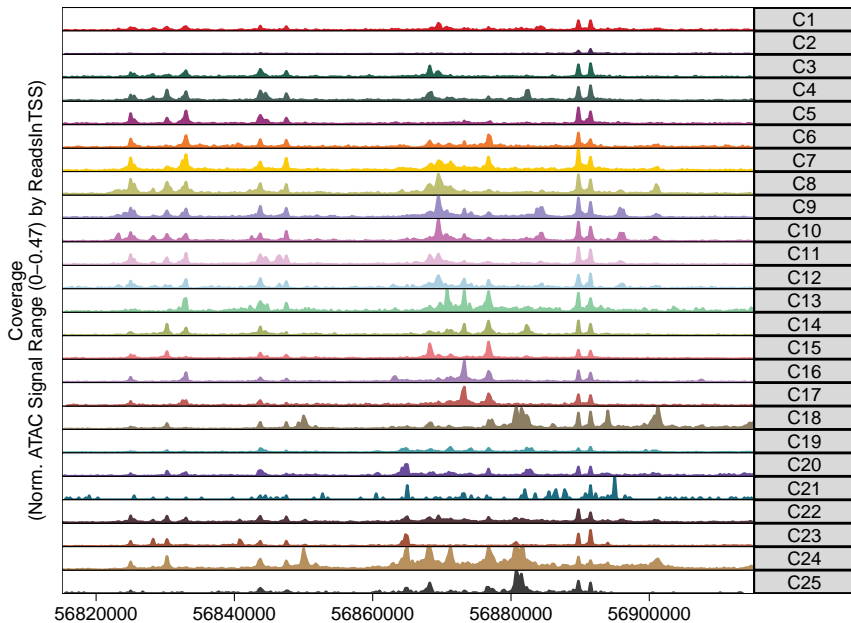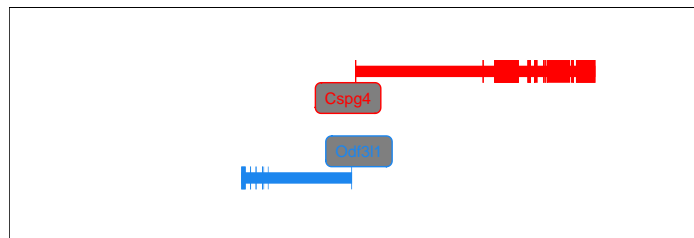

Genes

chr9:120099741–120199742

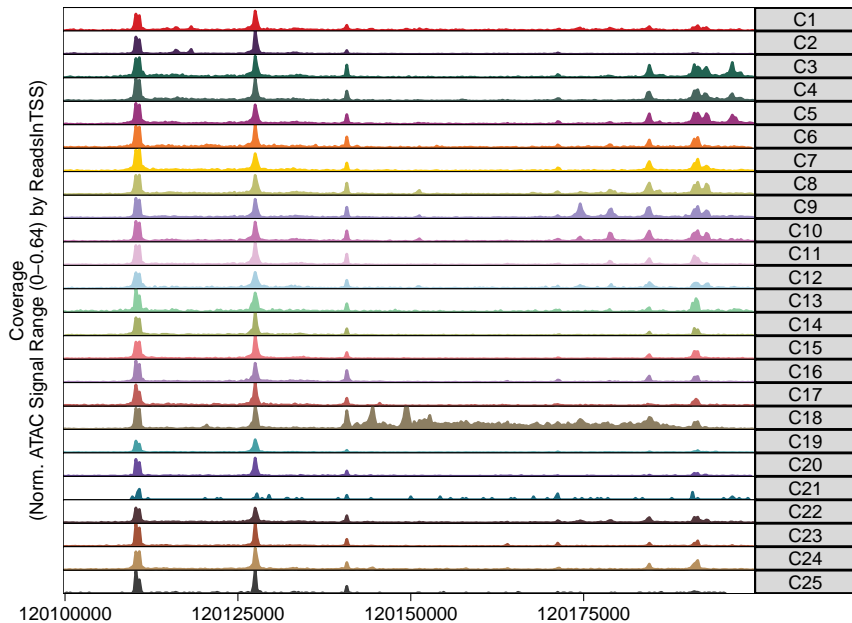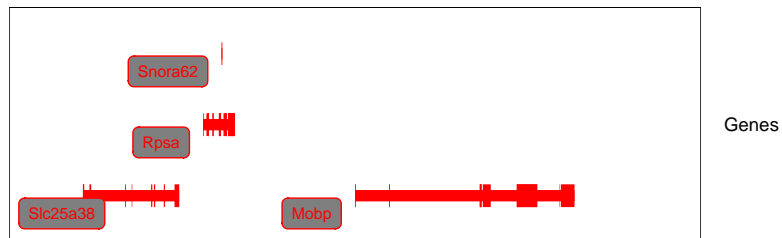

chr17:36973397-37073398

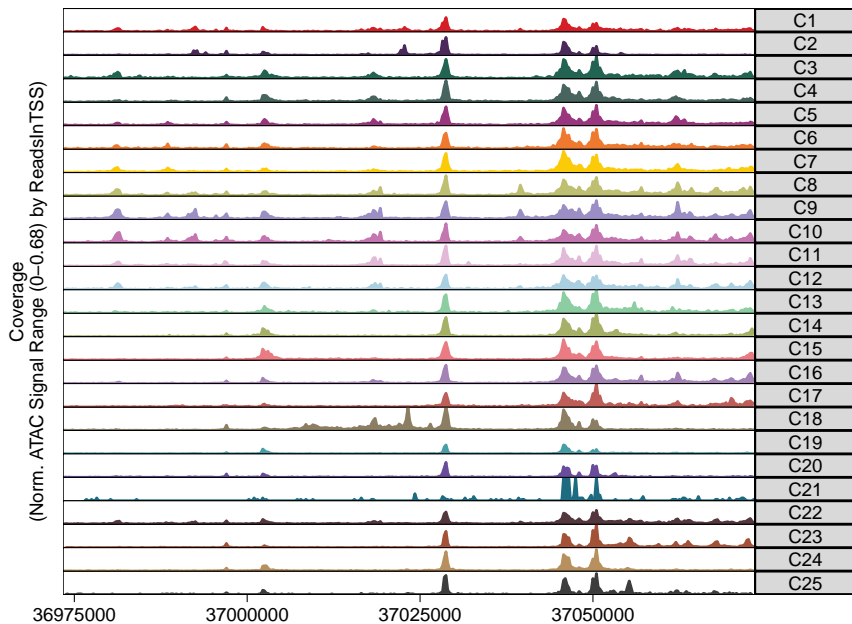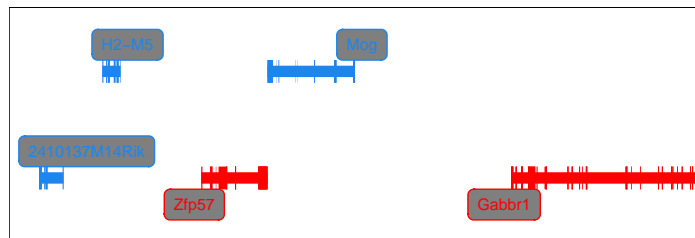

Genes

chr3:31099919-31199920

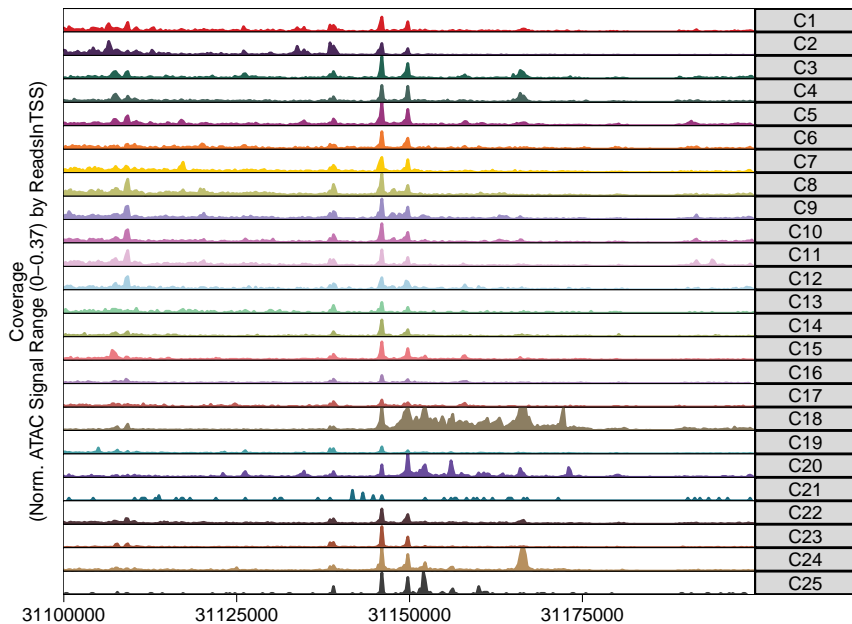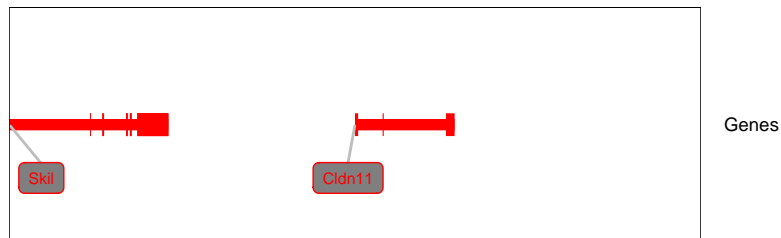

chr18:82425122-82525123

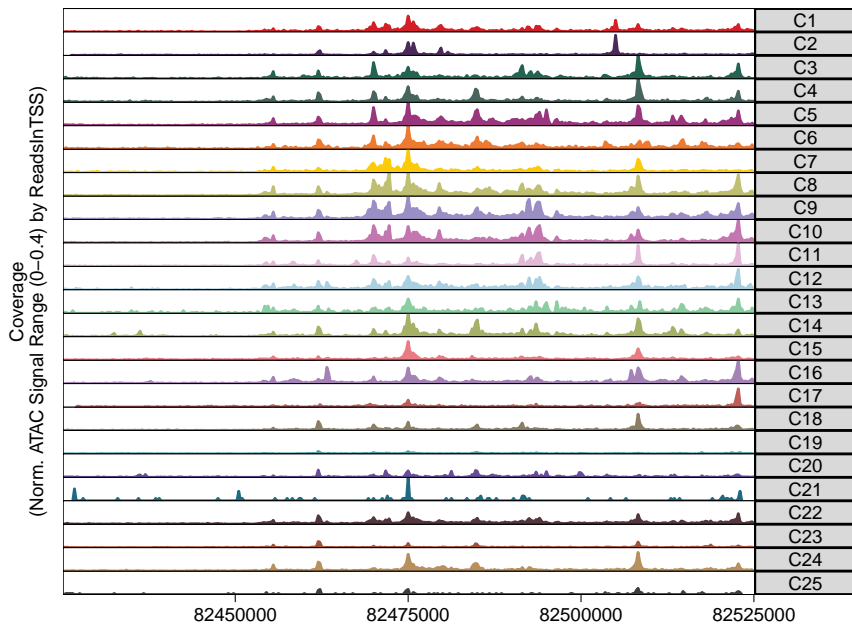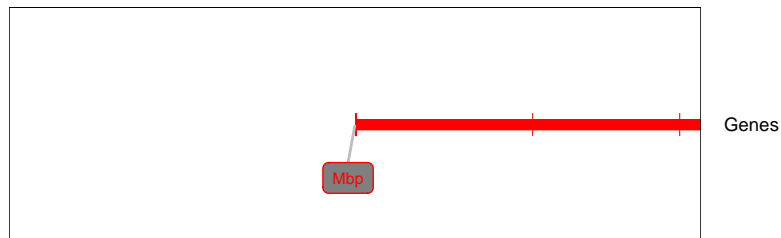

chr11:100524938–100624939

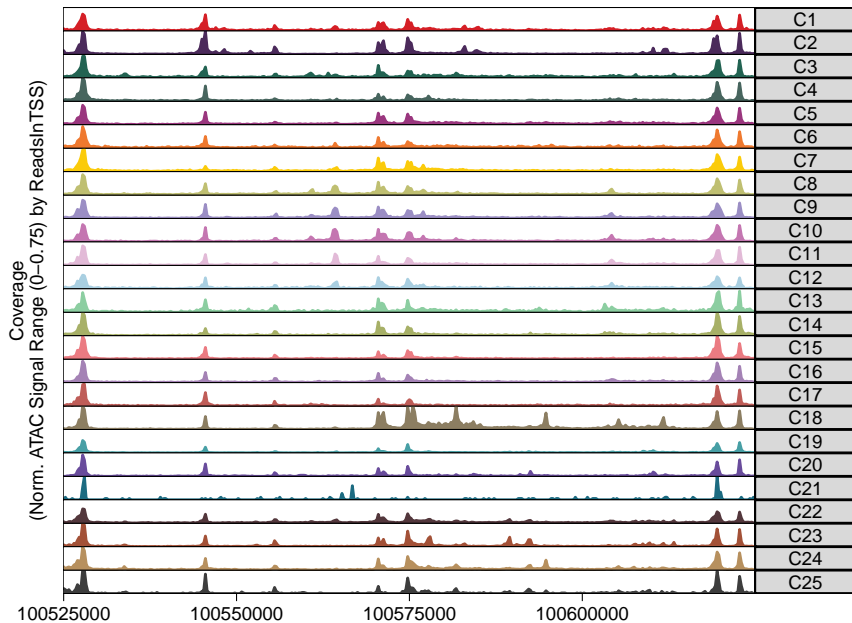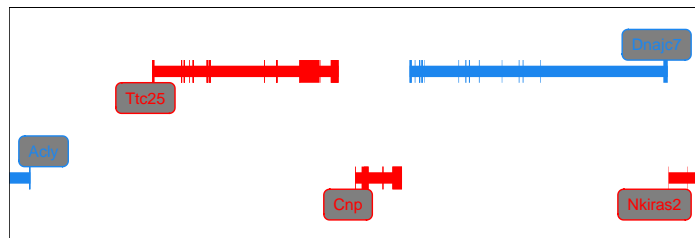

Genes

chr16:91219768-91319769

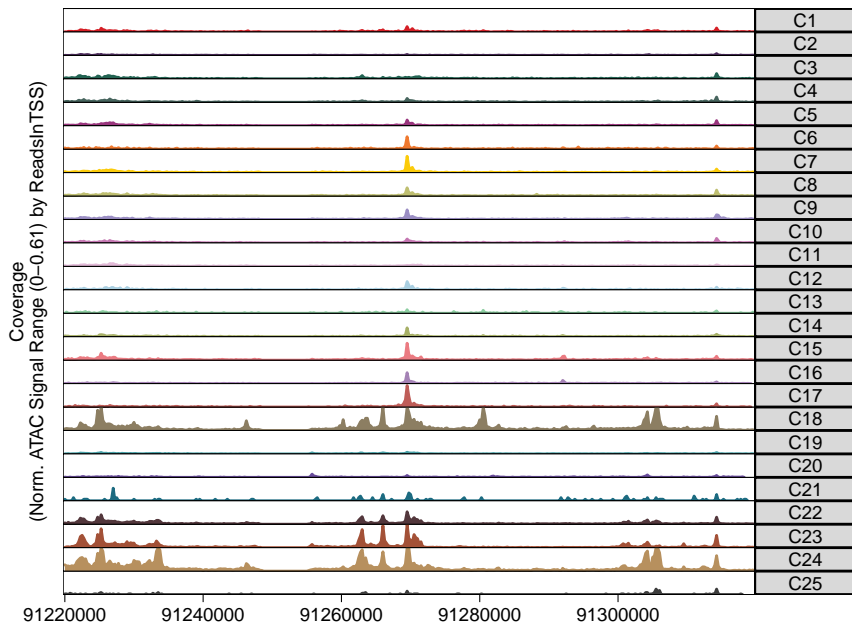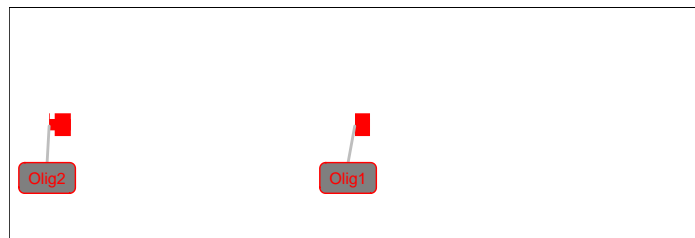

Genes

chr5:75102290-75202291

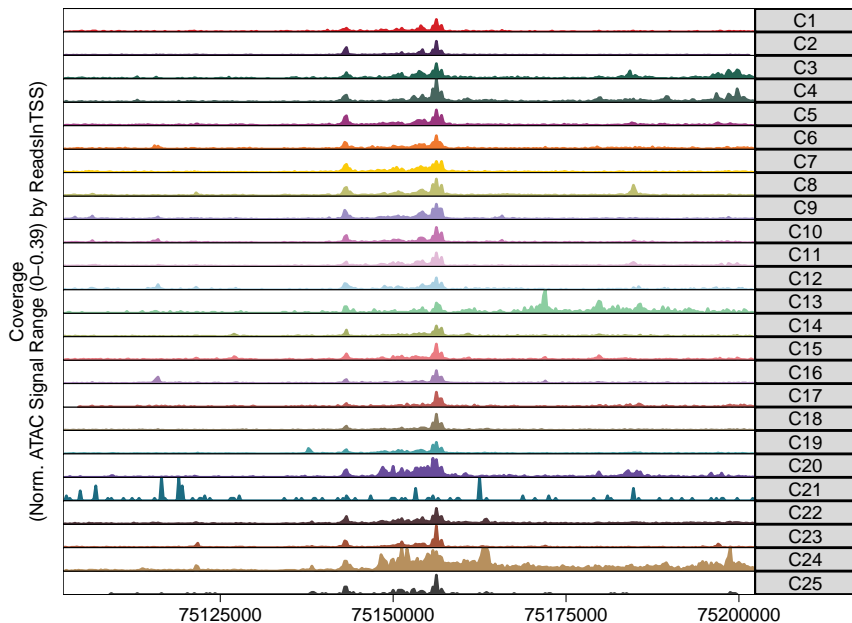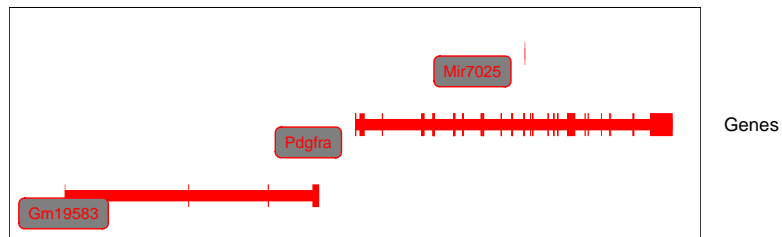



chr16:91175549-91275550

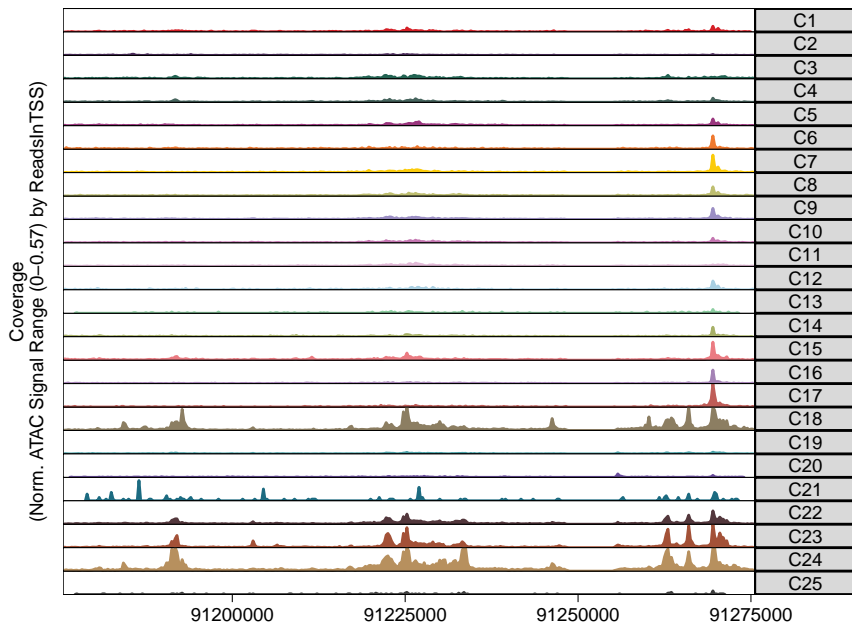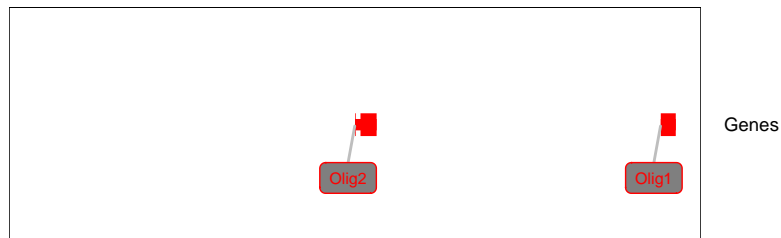

chr5:75928427-76028428

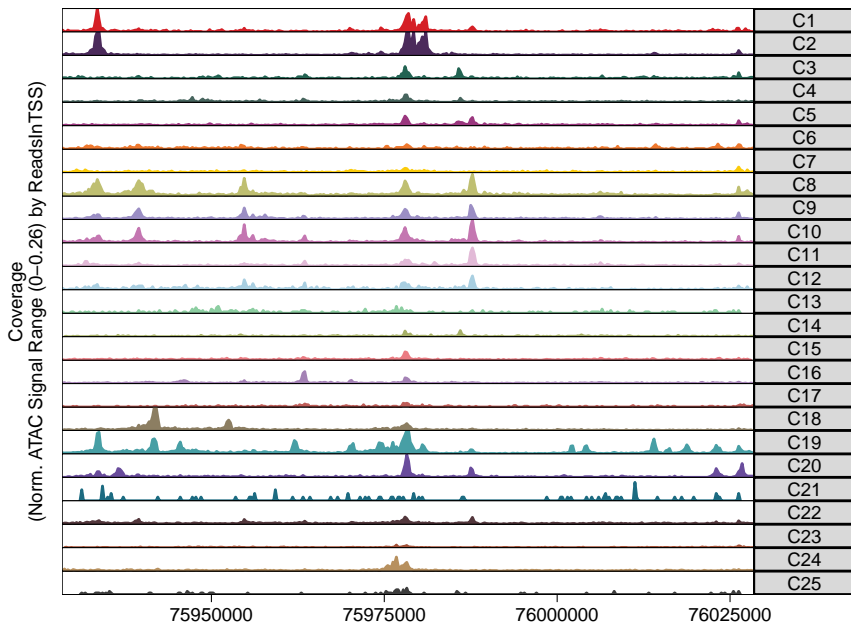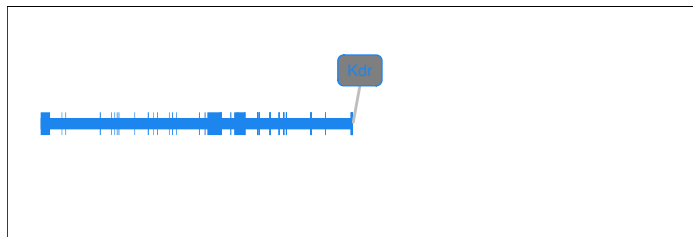

Genes

chr16:18726846–18826847

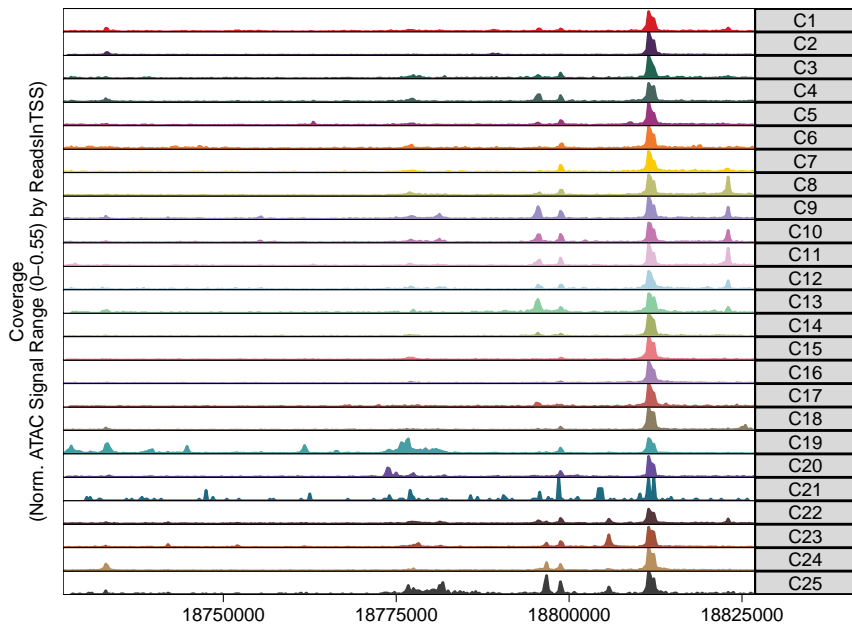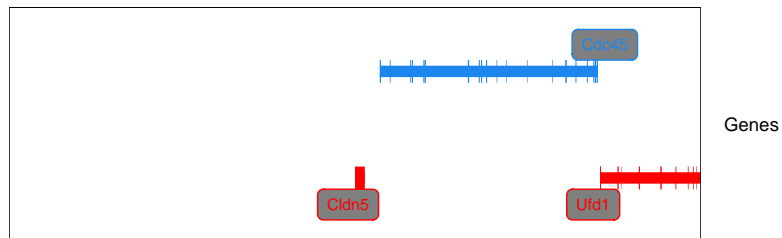

chr11:102847199-102947200

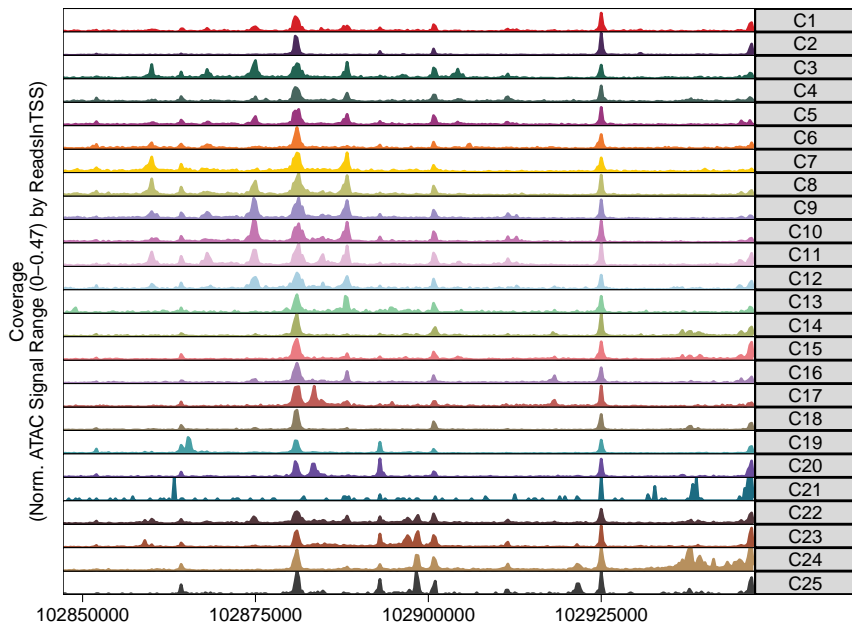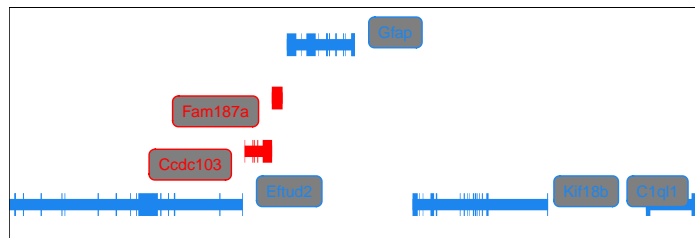

Genes

chr1:153849928–153949929

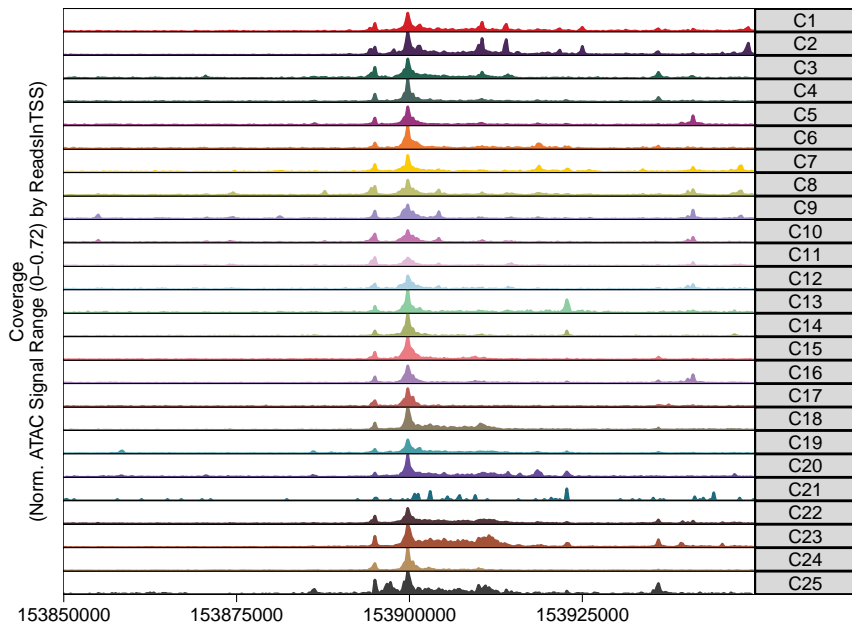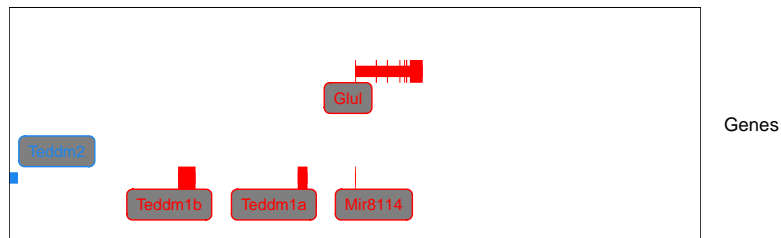

chr8:124519706–124619707

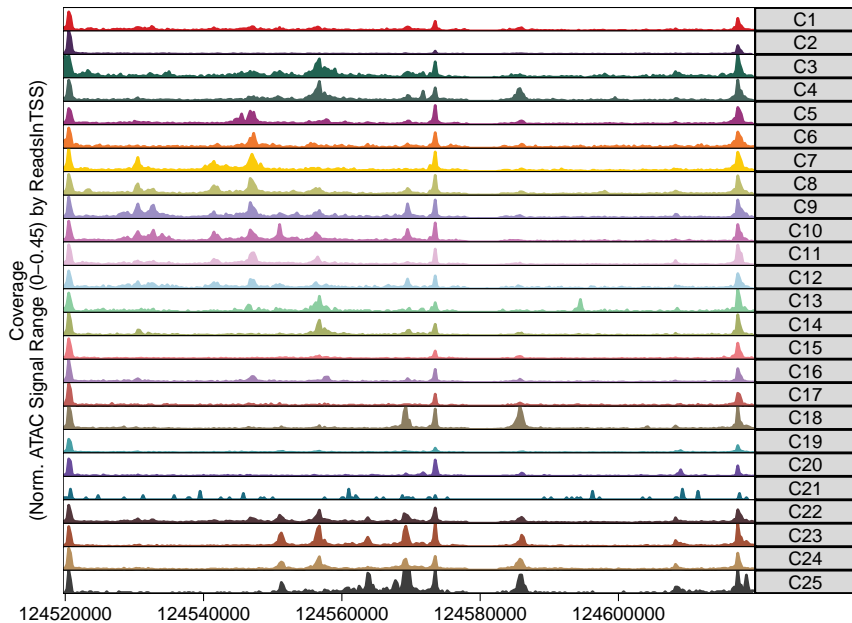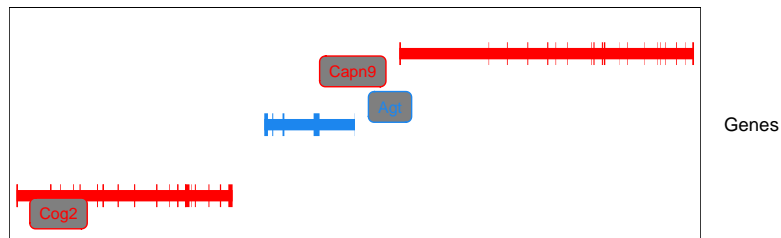

chr4:143249563–143349564

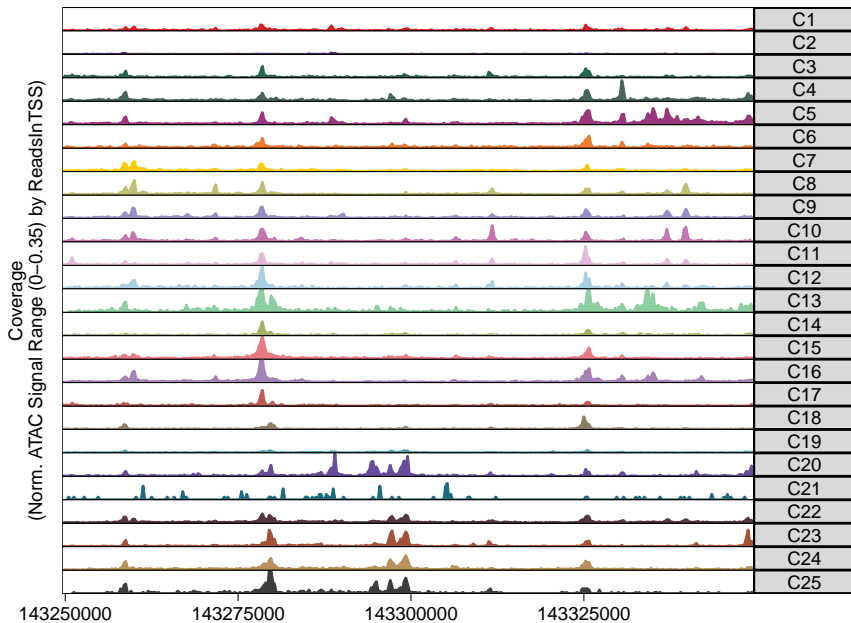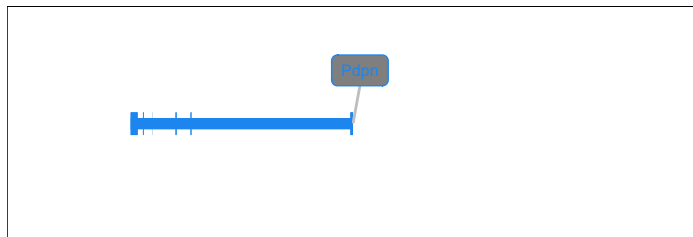

Genes

chr18:15360981-15460982

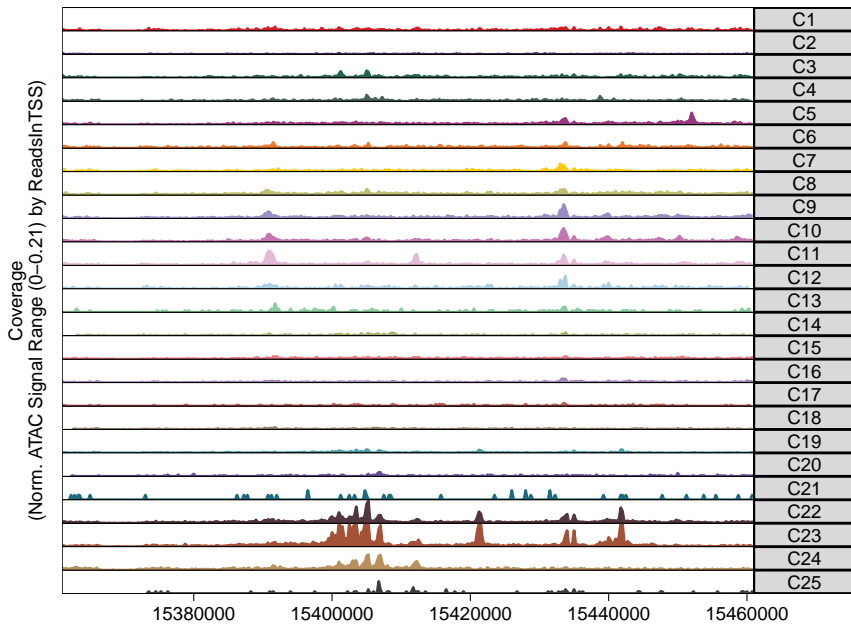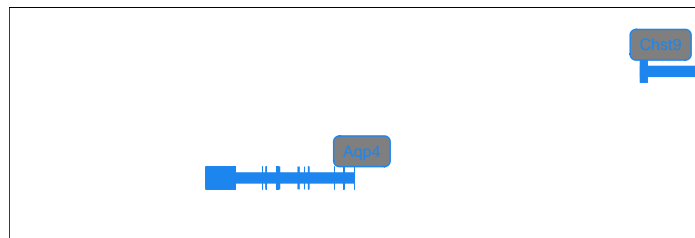

Genes



chr12:16603469-16703470

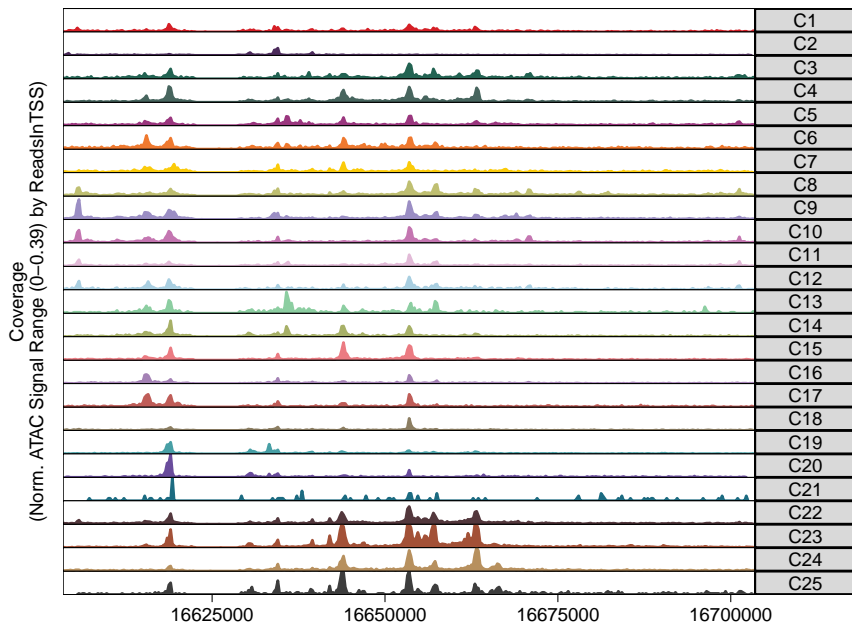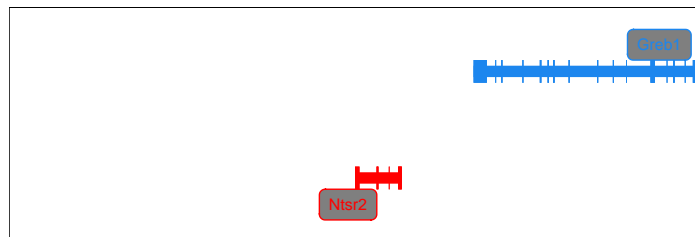

Genes

chr5:147675987-147775988

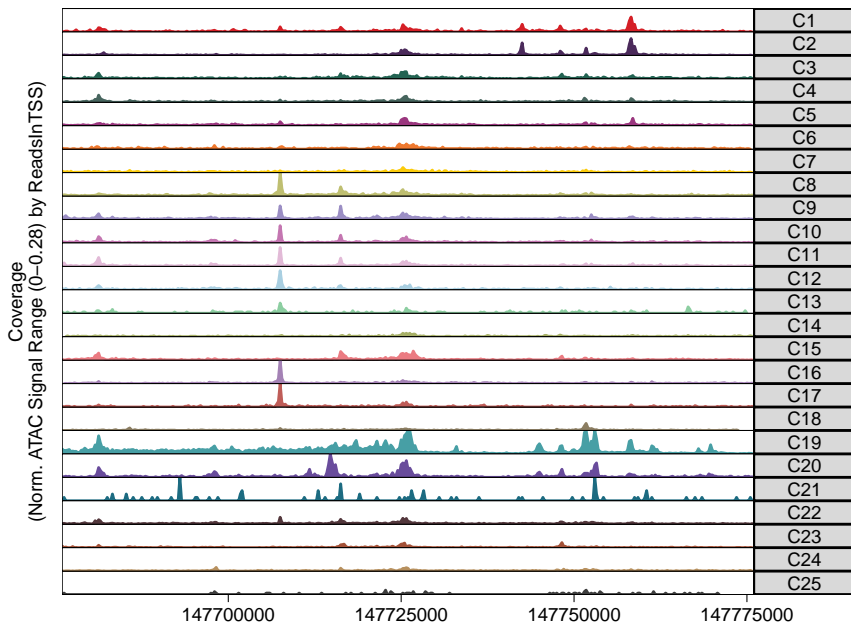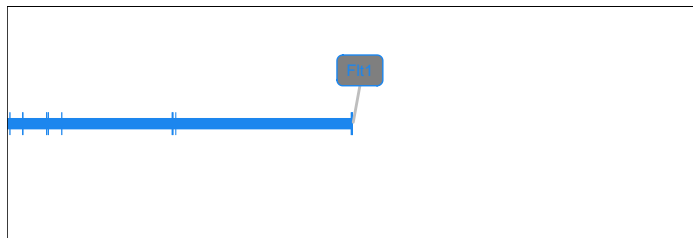

Genes

chr10:56327272-56427273

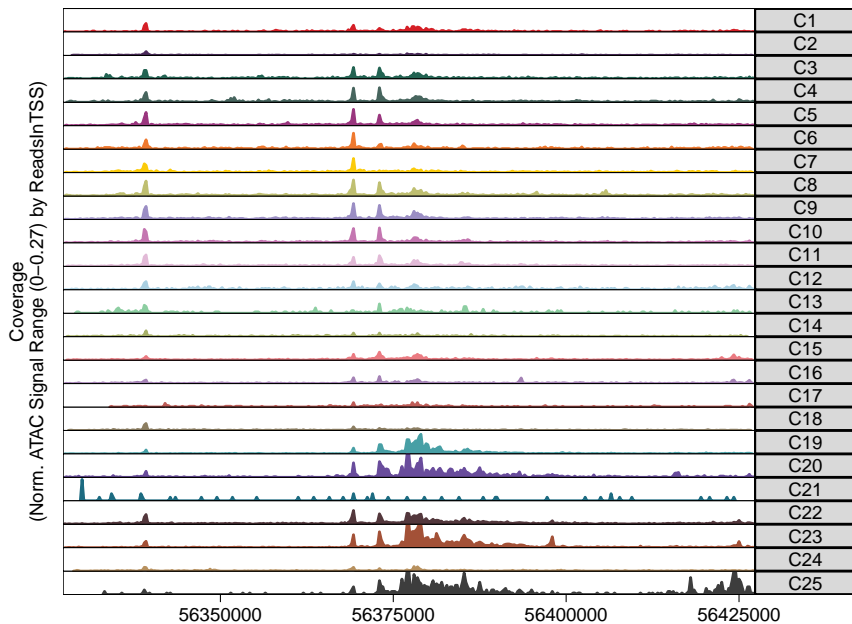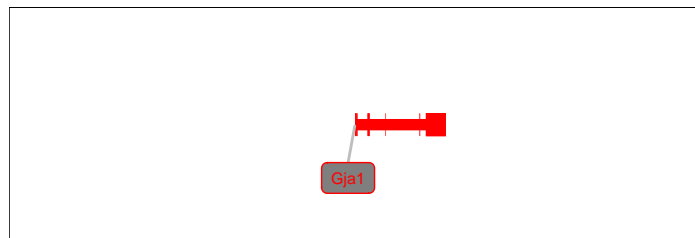

Genes

chr4:136848843-136948844

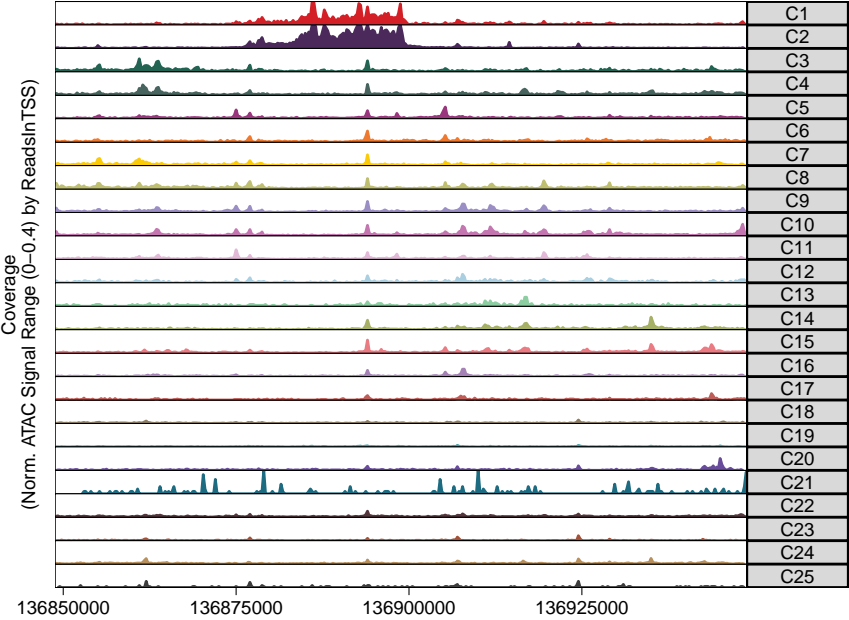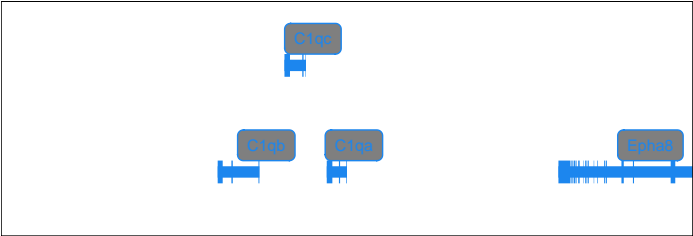

Genes

chr4:136842913-136942914

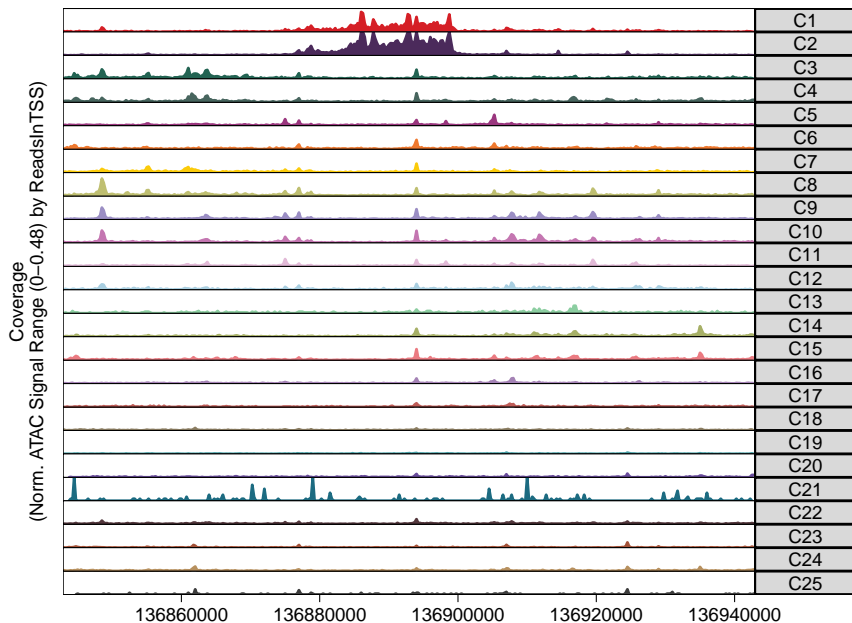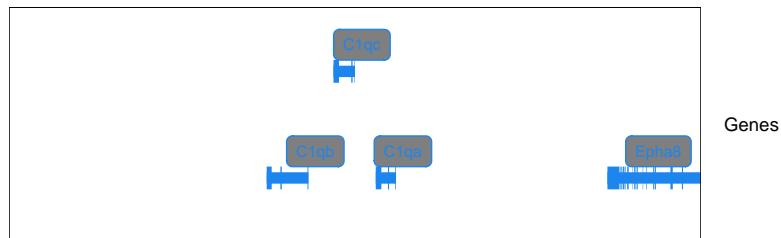

chr9:120018295–120118296

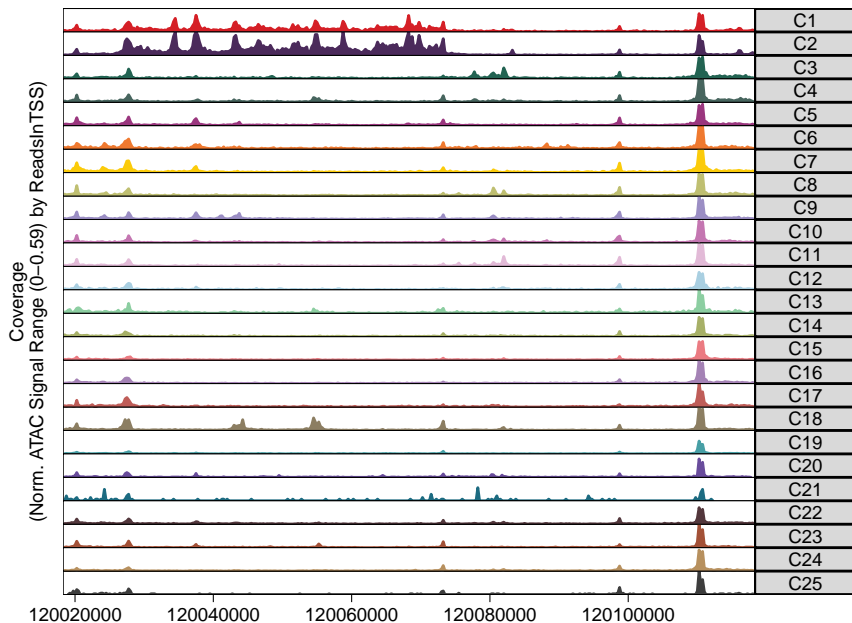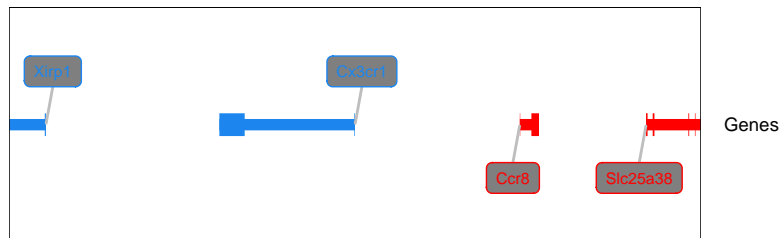

chr2:14179413-14279414

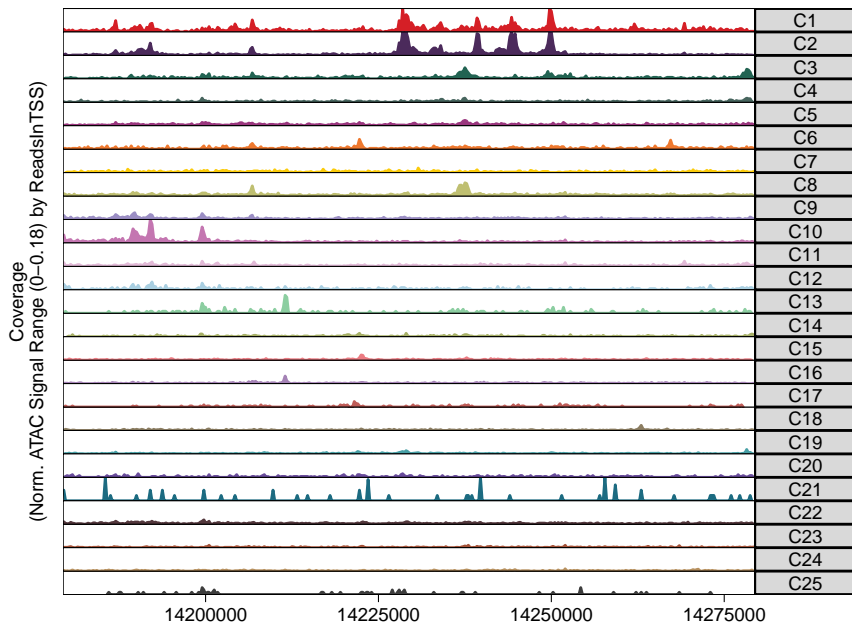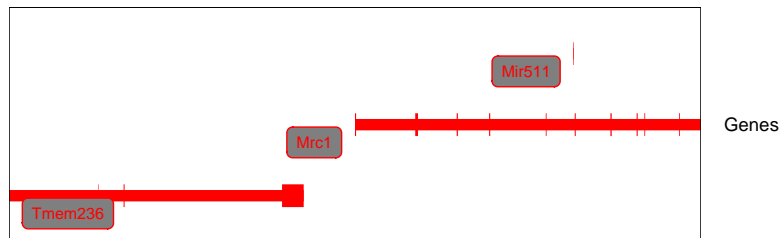

chr3:95476785-95576786

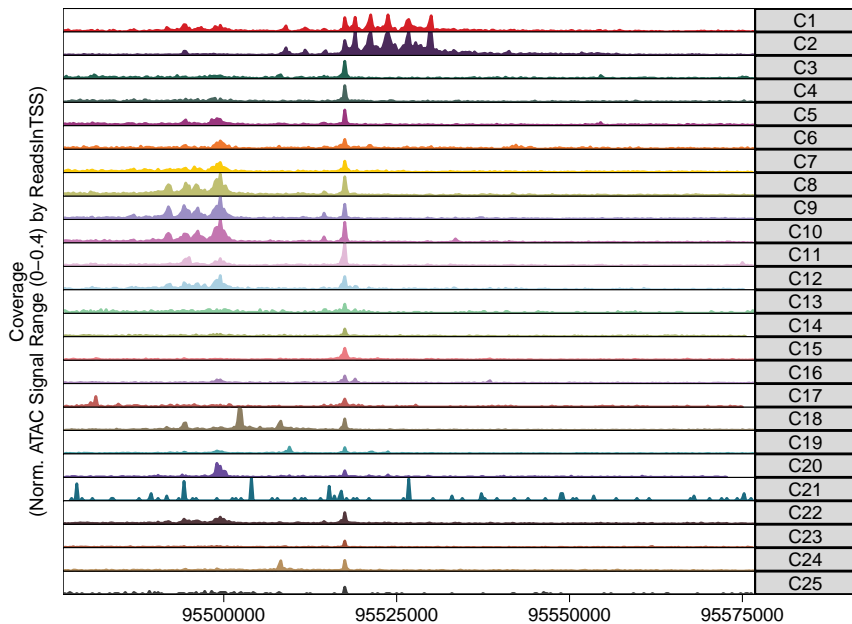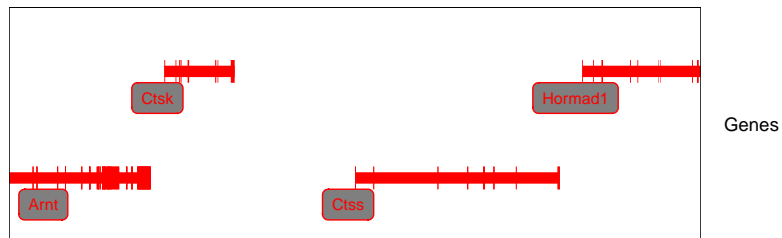



chr7:30363787-30463788

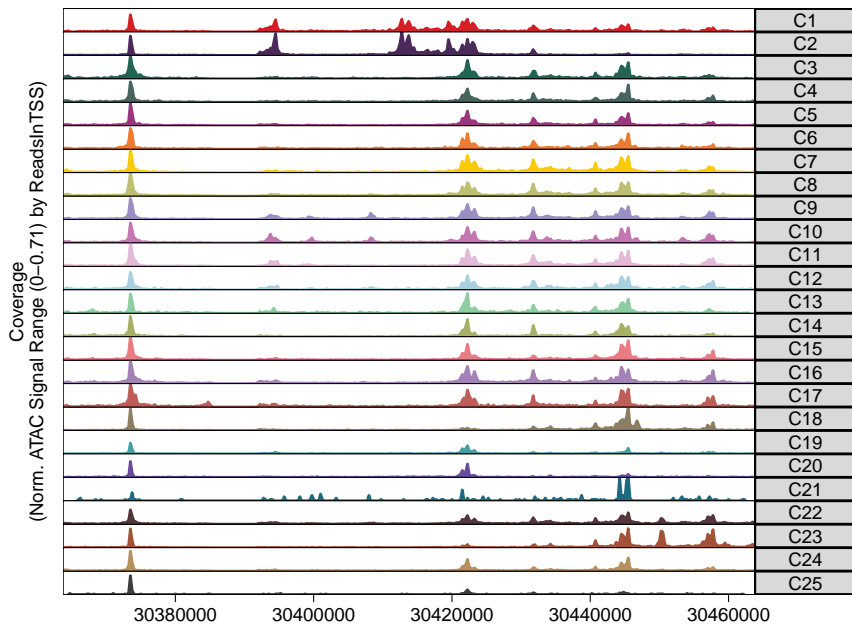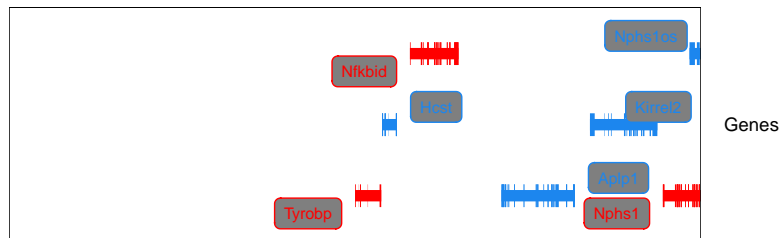

chr7:45113920-45213921

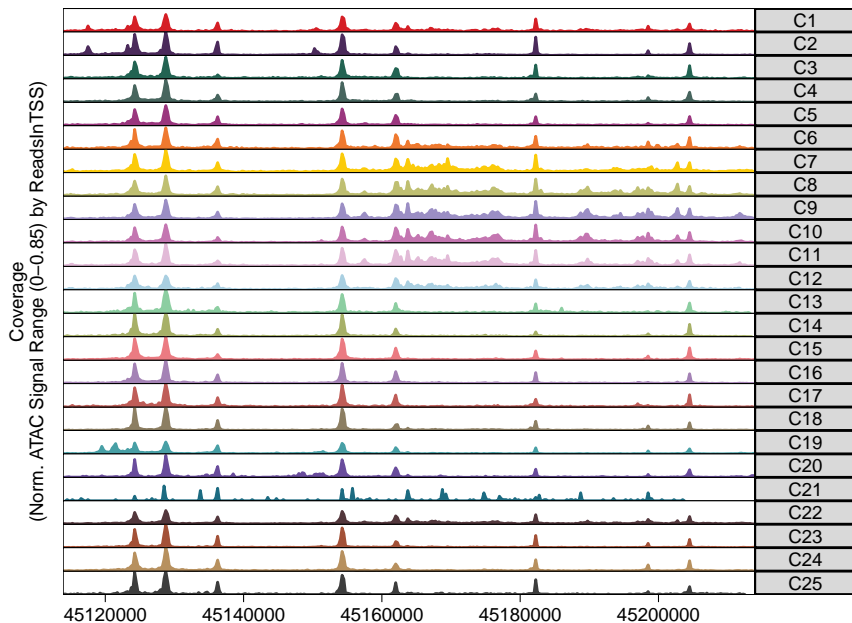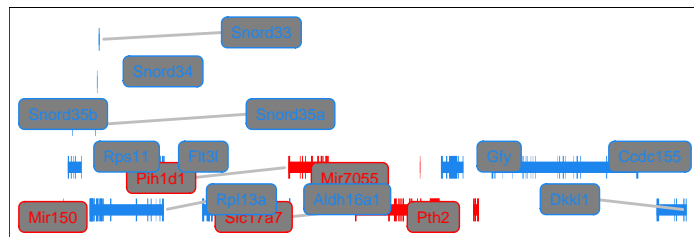

chr1:24537436-24637437

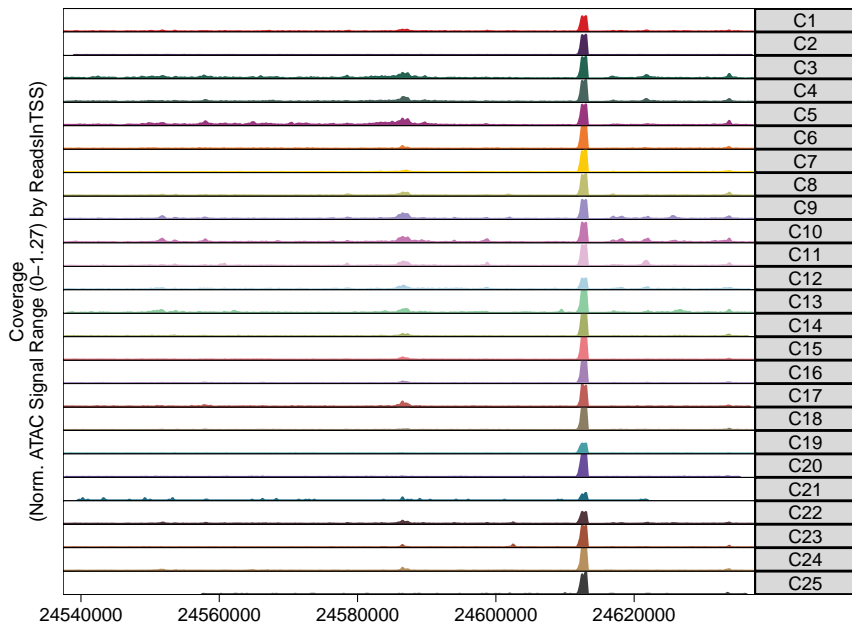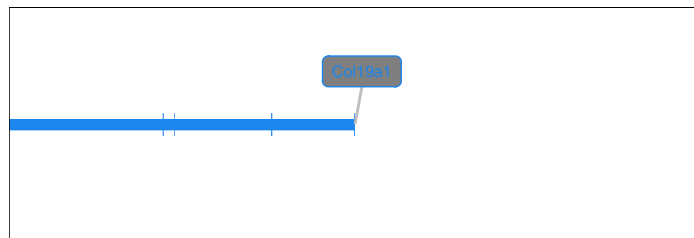

Genes

chr7:112109056-112209057

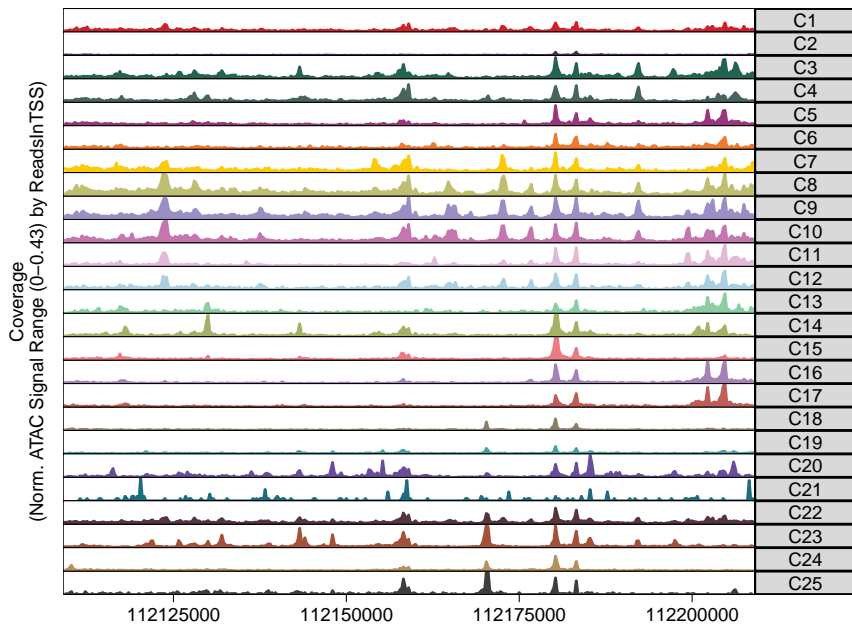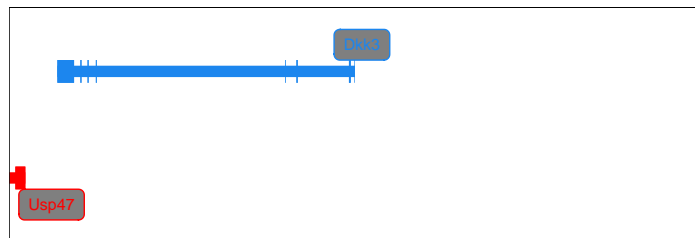

Genes

chr5:73288946-73388947

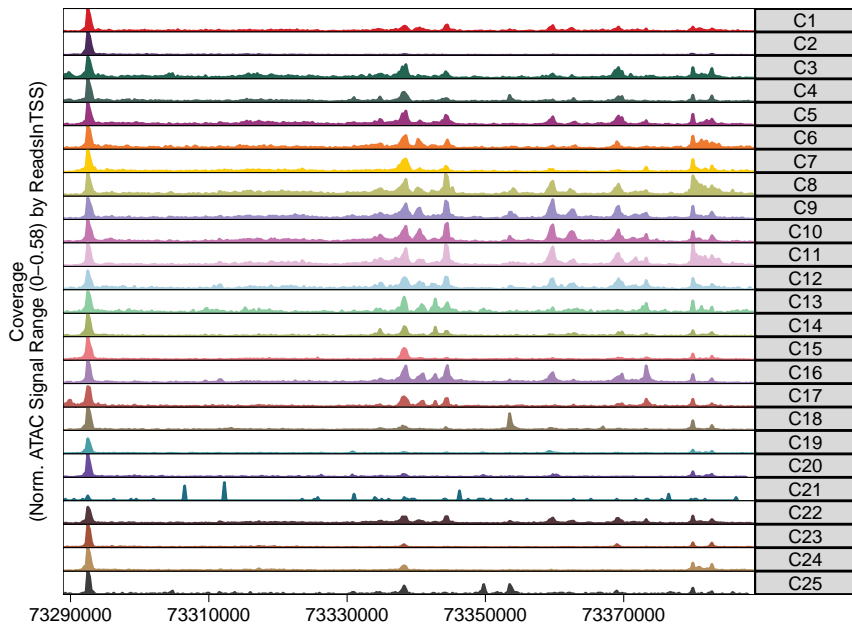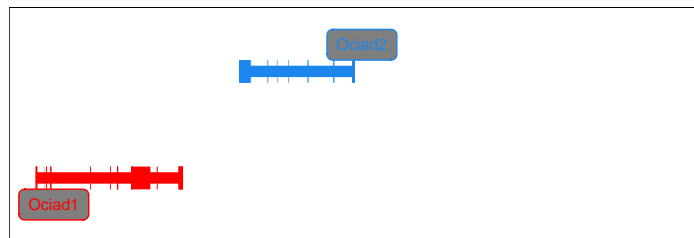

Genes

chr19:19061195-19161196

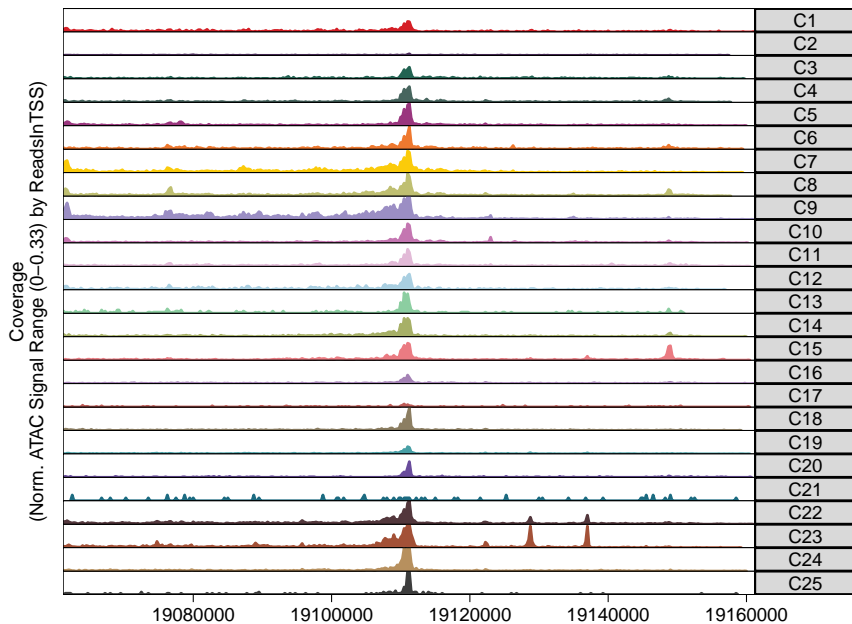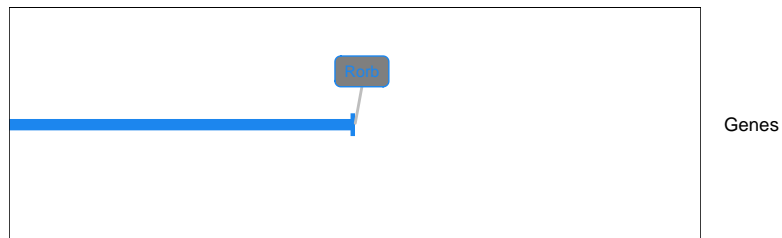

chr6:14851348-14951349

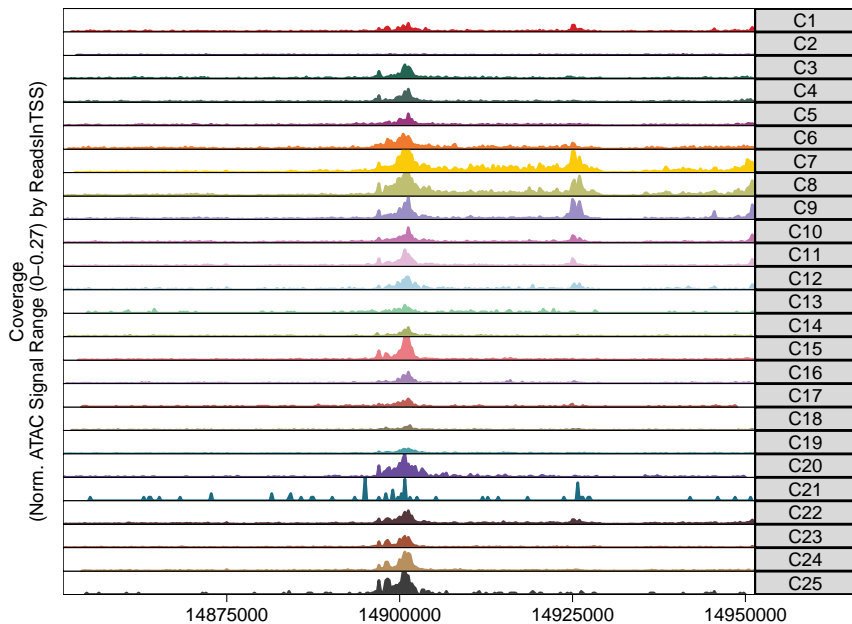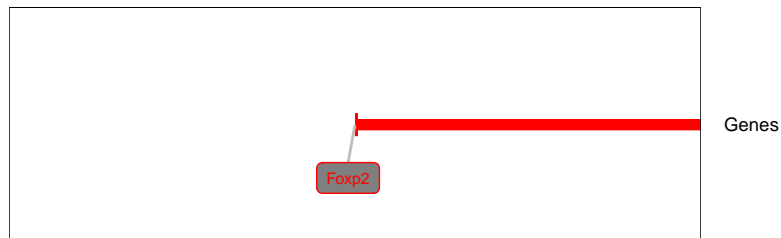

chr1:12642429-12742430

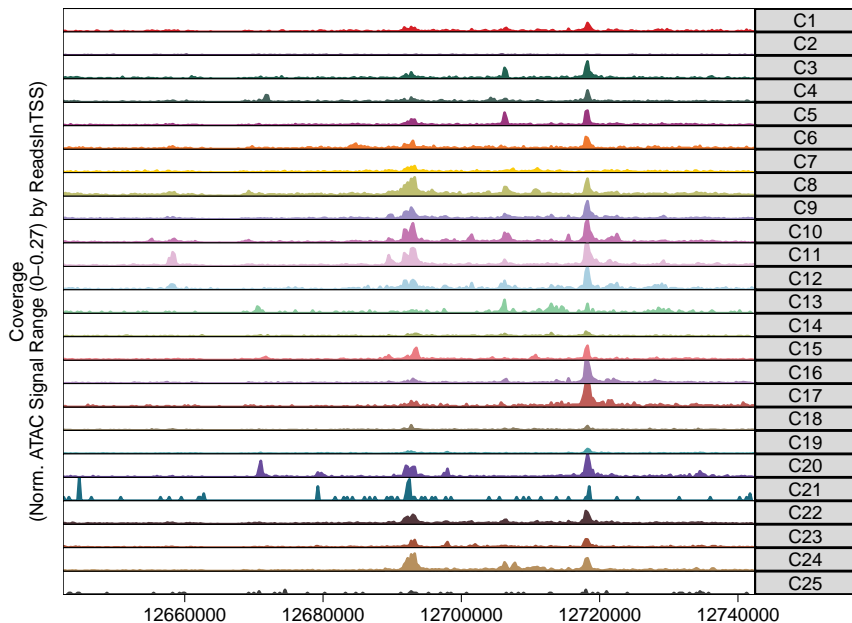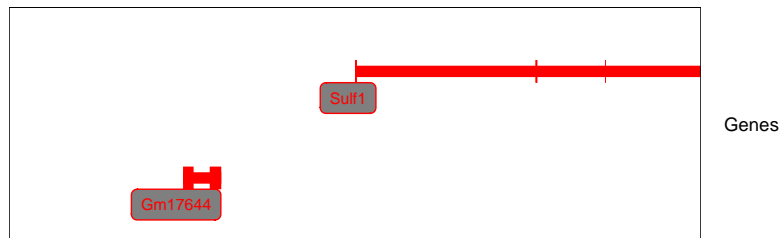



chr2:70512128-70612129

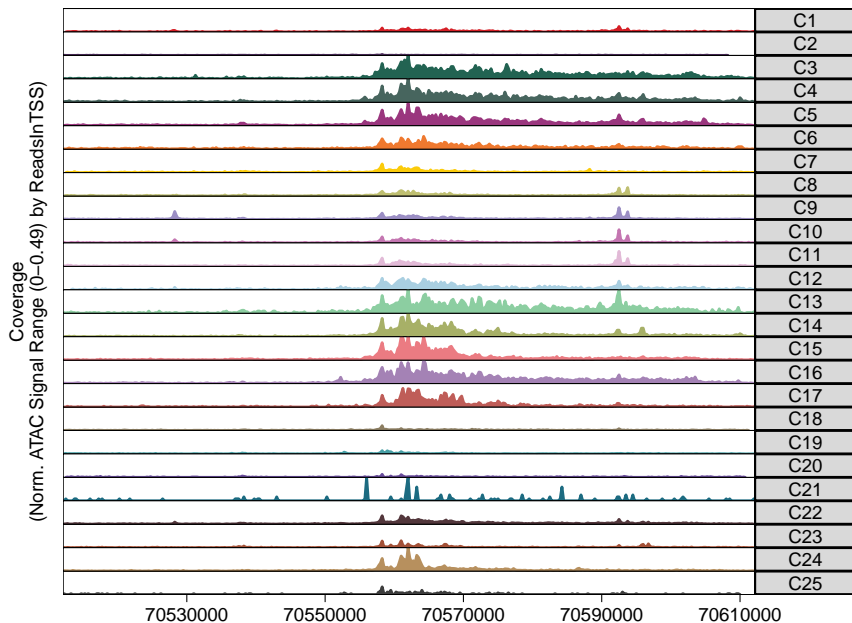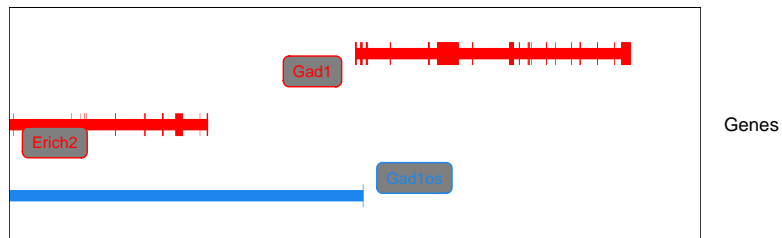

chr2:22572326-22672327

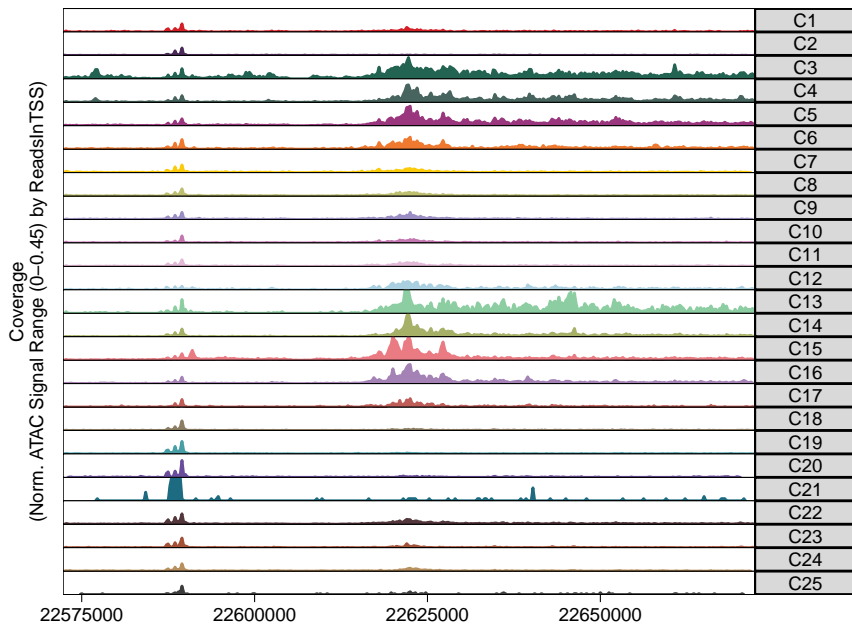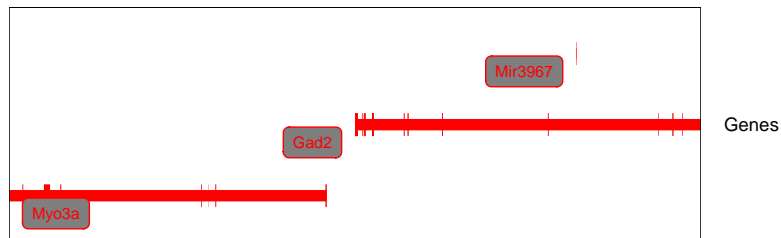

chr15:78156350–78256351

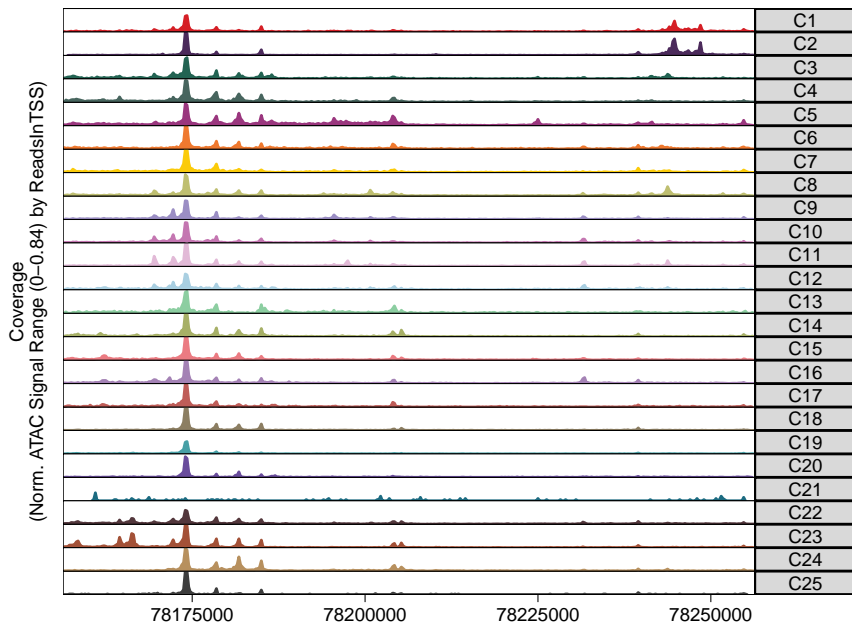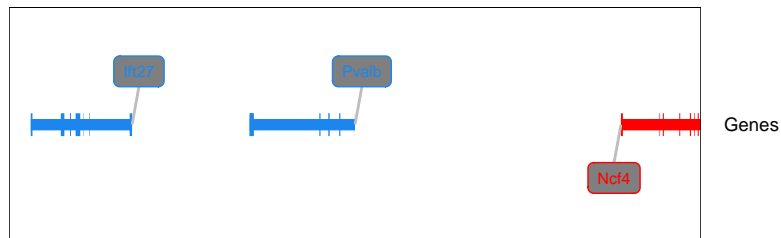

chr2:71479444-71579445

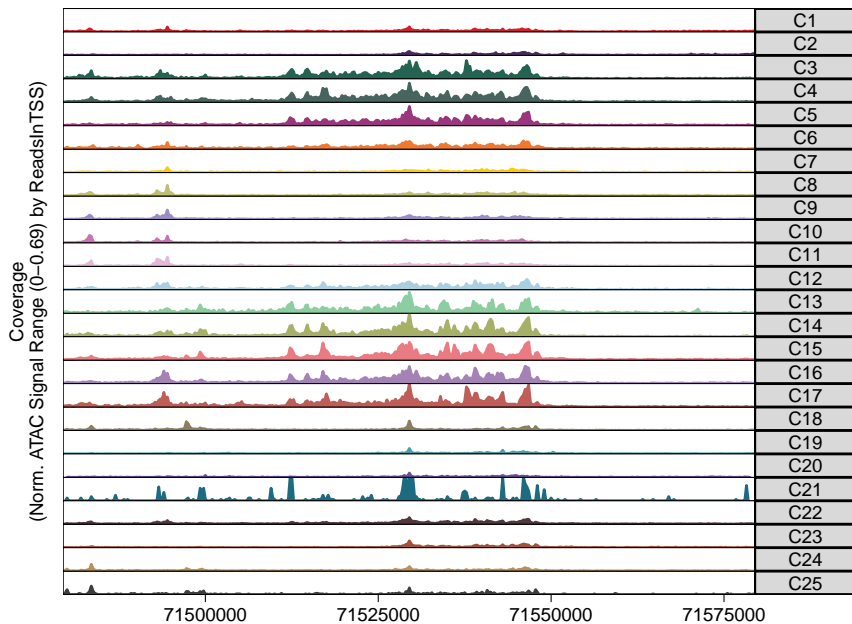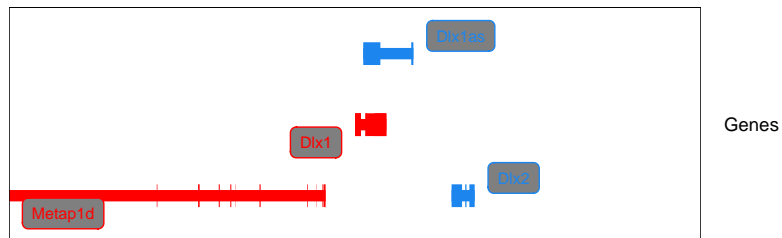

chr2:71496753-71596754

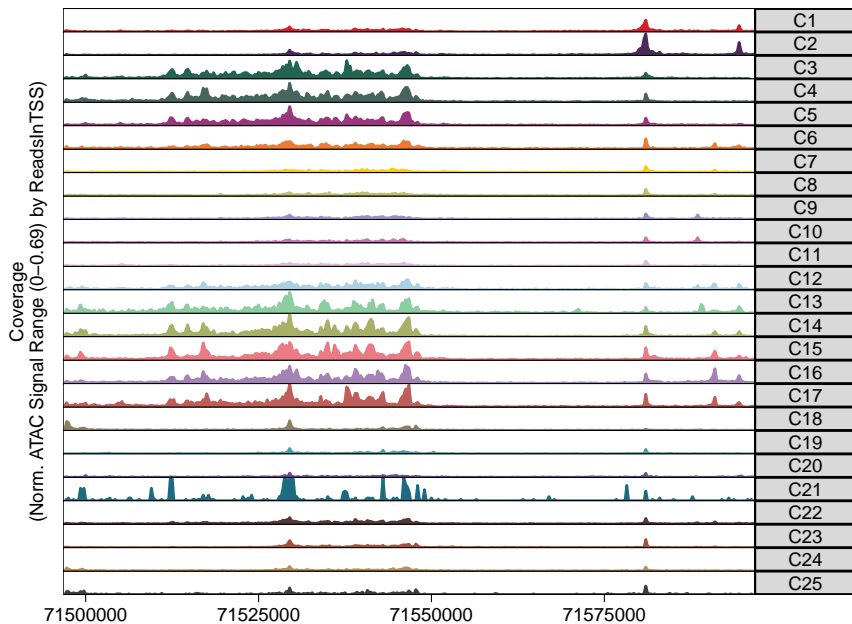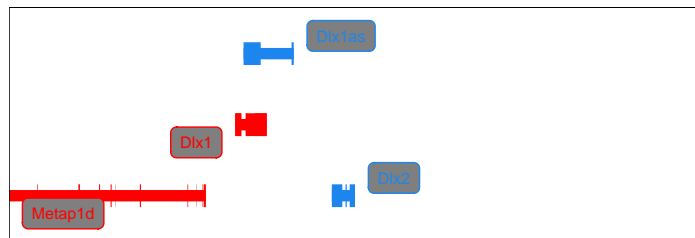

Genes

chr16:23840843-23940844

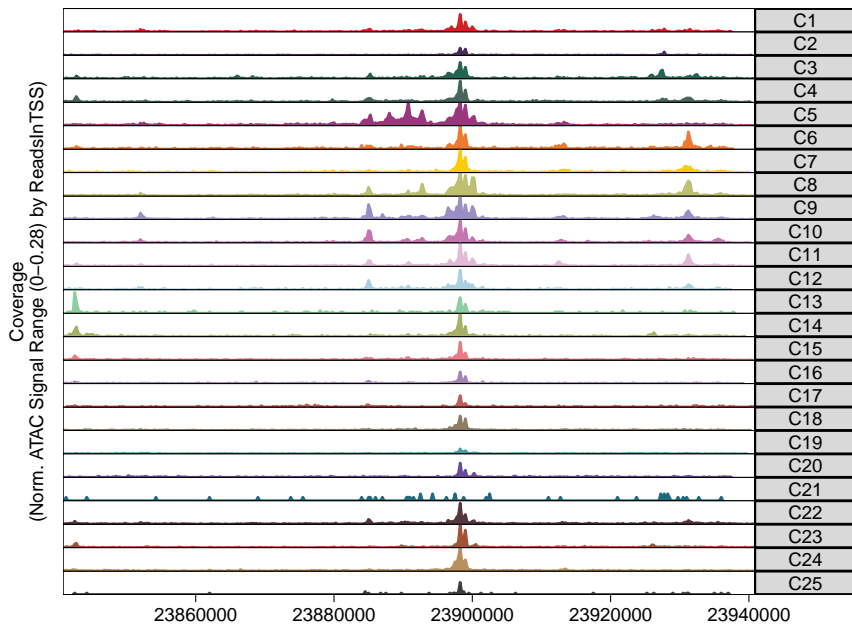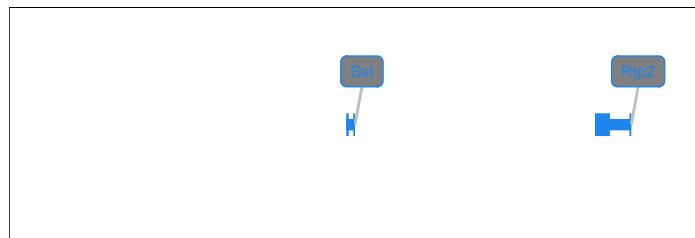

Genes

chr10:5589217-5689218

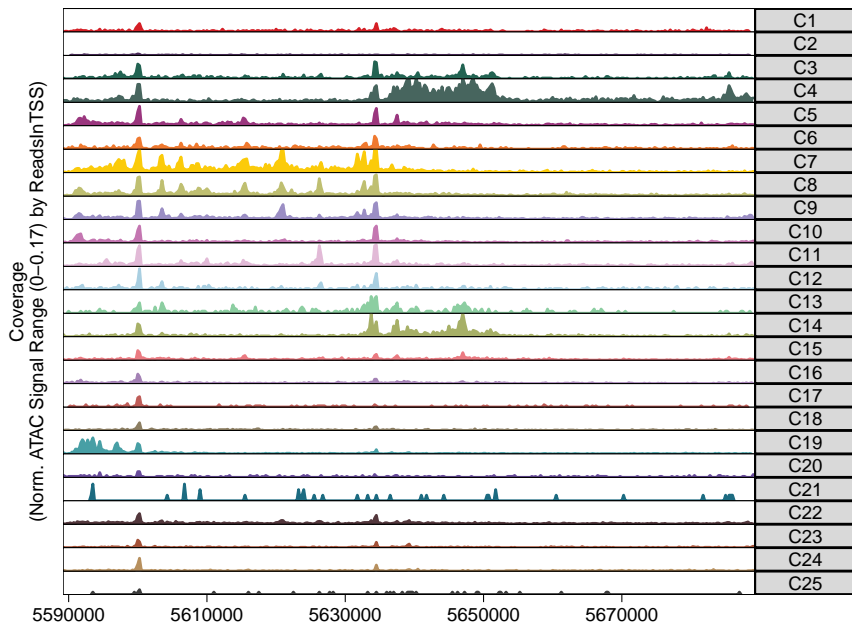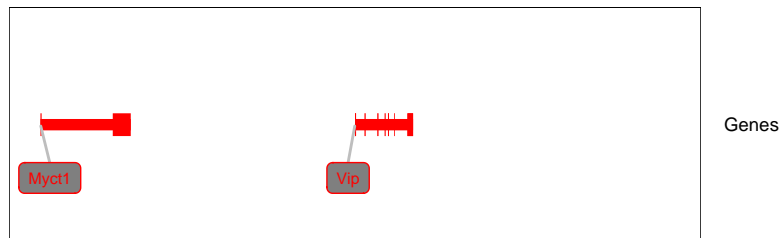

chr2:158560757-158660758

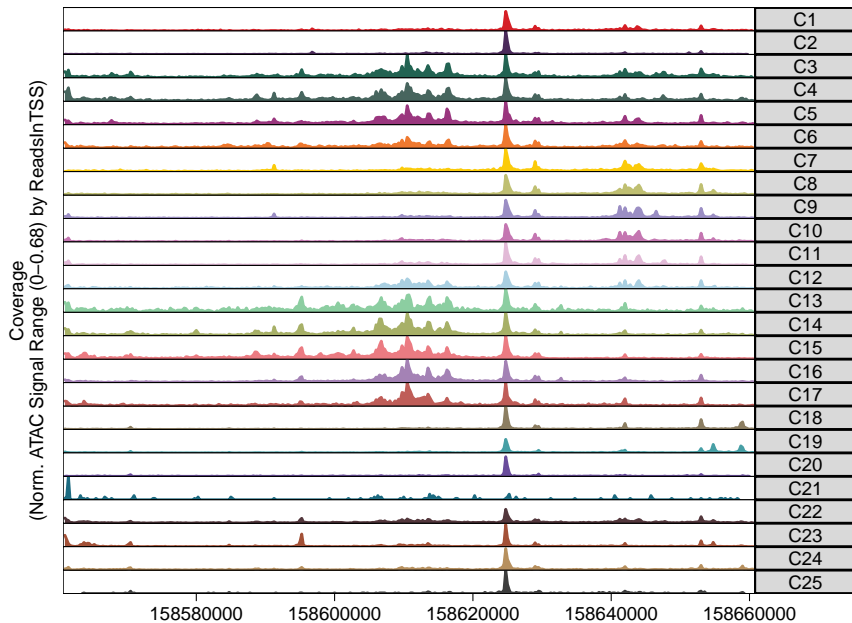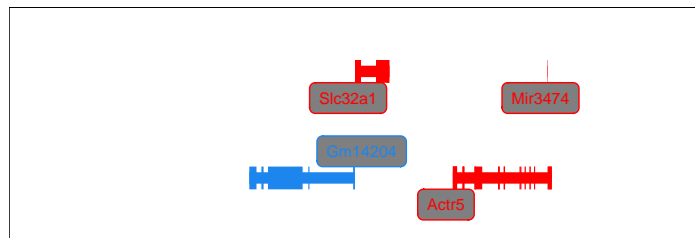

Genes



chr16:78880947-78980948

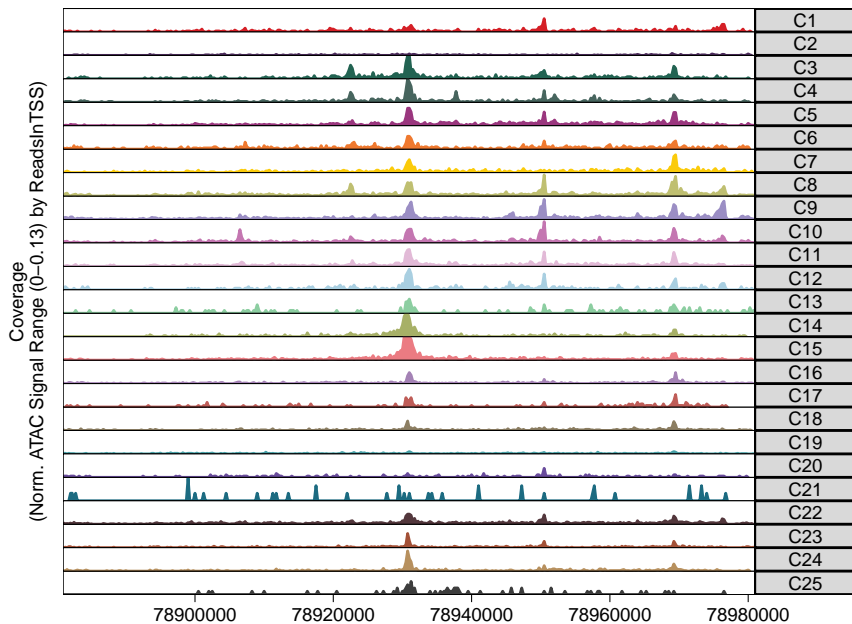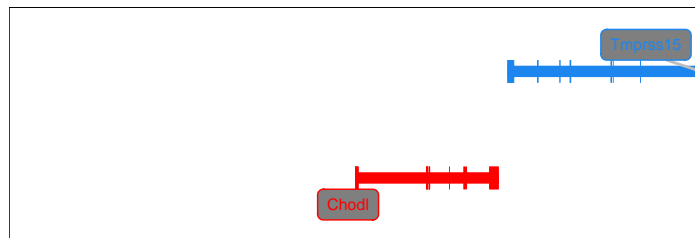

Genes

chr2:36055407-36155408

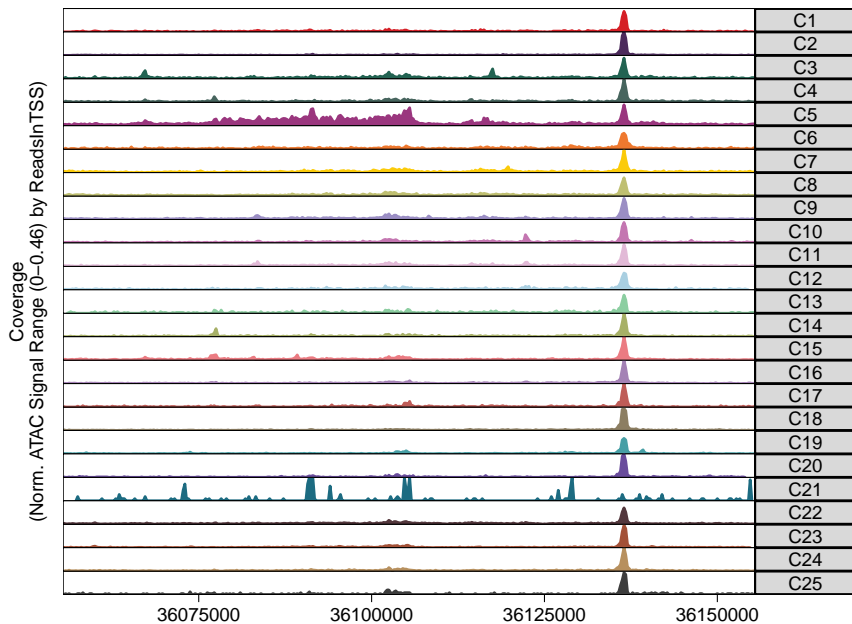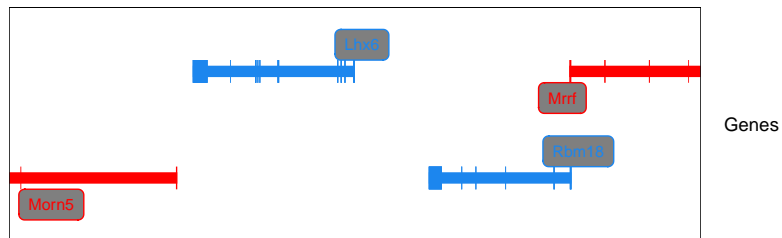

chr6:65621610-65721611

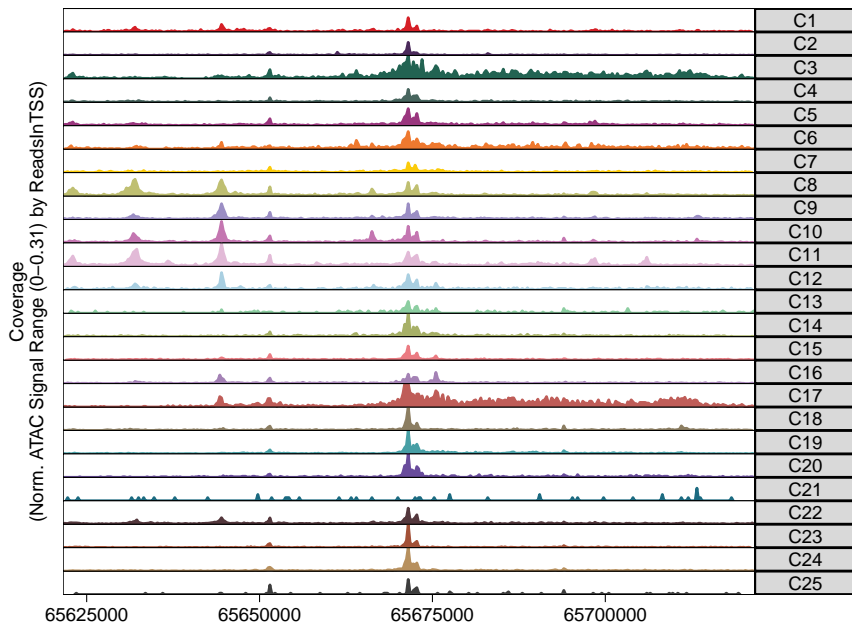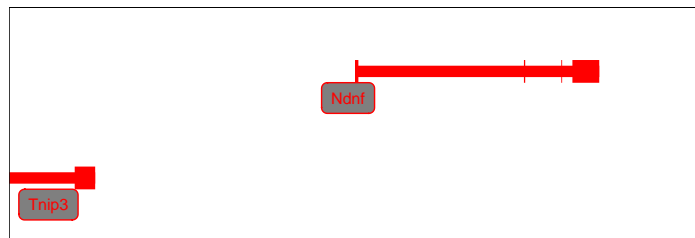

Genes

chr14:34324668–34424669

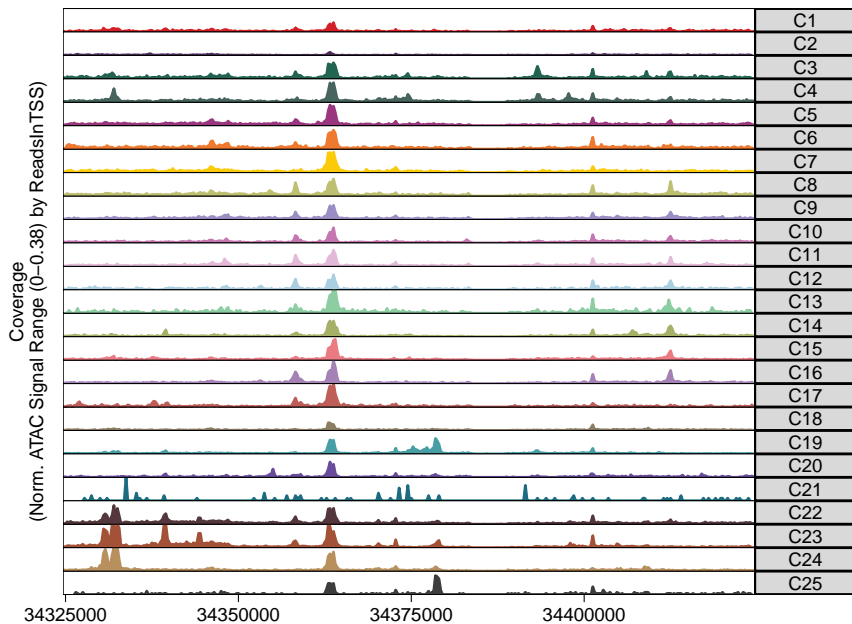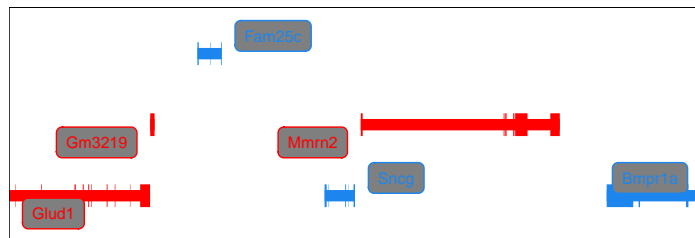

Genes

chr2:136007926-136107927

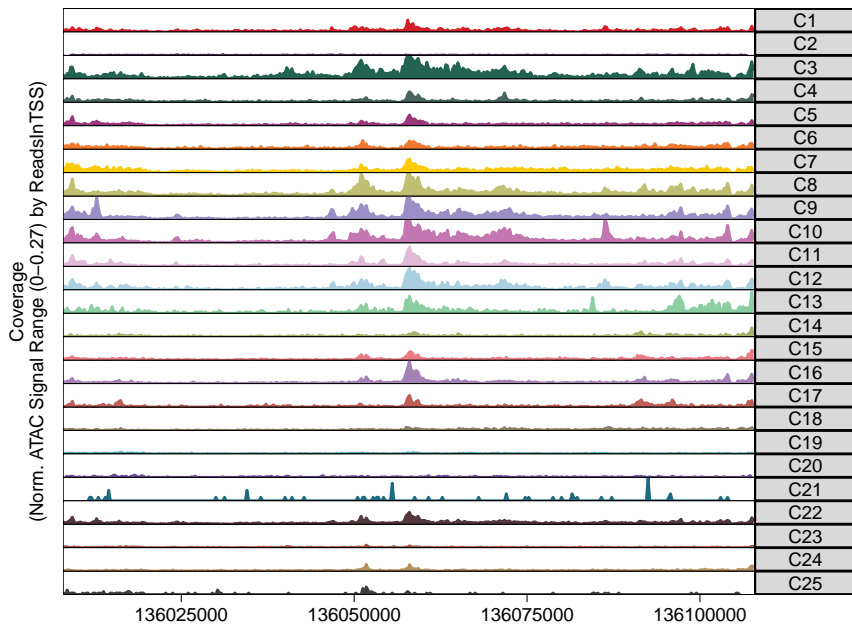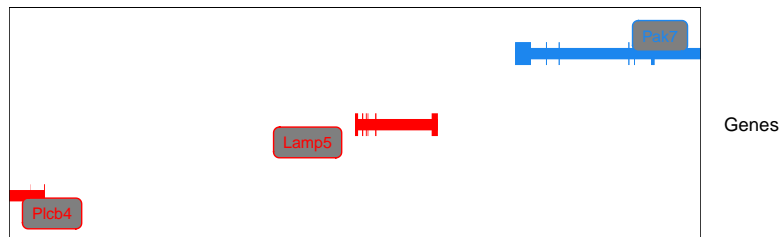

chr14:12295864–12395865

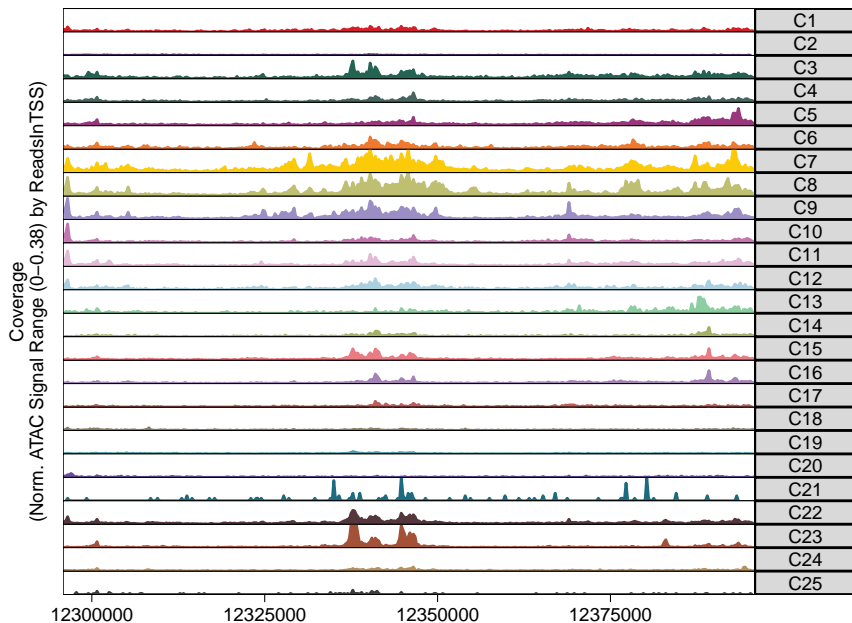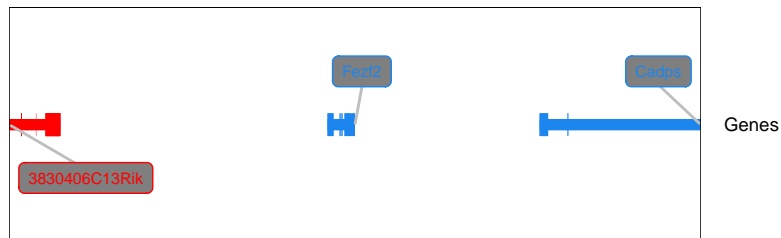

Supplement: Supplemental_File_S1.zip [file Marker Gene Tracks - sciATACv3.pdf › Marker Gene Tracks - sciATACv3.pdf]
