# Supplementary material for: Atlas-scale single-cell chromatin accessibility using nanowell-based combinatorial indexing
Source: HighWire-hosted journal article supplement (doi:10.1101/gr.276655.122), 2023-02-01
Supplement: Supplemental_File_S1.zip [file Supplemental_File_S1_Legend.docx]

**Supplemental File S1: Marker Gene Tracks**

Chromatin accessibility tracks plotted using ArchR for relevant marker genes, split by called cluster.
