# Supplementary material for: Atlas-scale single-cell chromatin accessibility using nanowell-based combinatorial indexing
Source: HighWire-hosted journal article supplement (doi:10.1101/gr.276655.122), 2023-02-01
Supplement: Supplemental_File_S2.zip [file GABAergic TF Footprinting - sciATACv1.pdf › GABAergic TF Footprinting - sciATACv1.pdf]

Arnt\_1

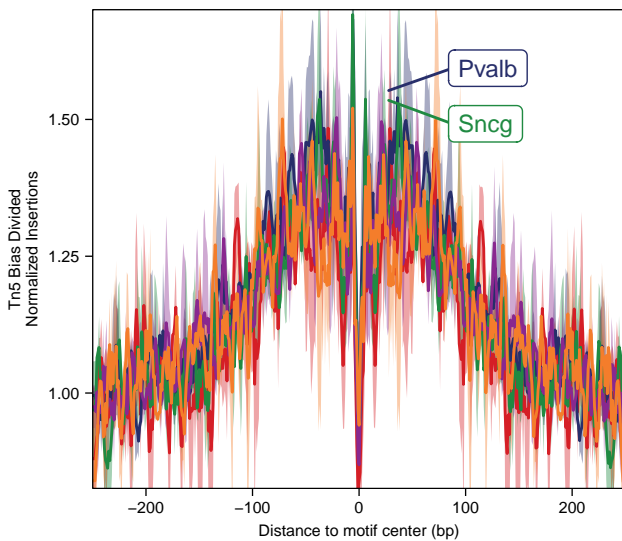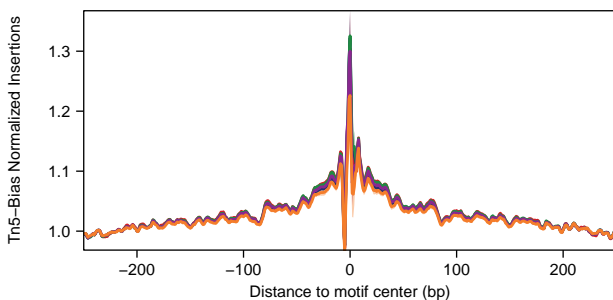

group ■ Lamp5 ■ Pvalb ■ Sncg ■ Sst ■ Vip

Ahr..Arnt\_2

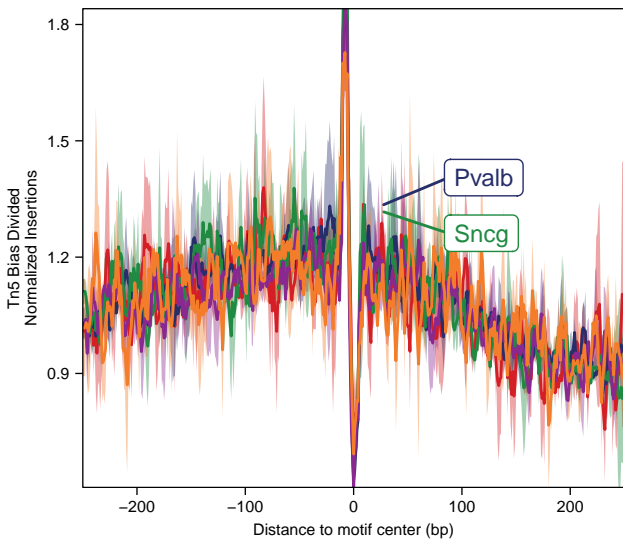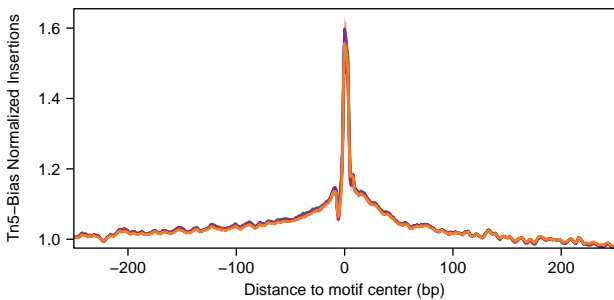

group Lamp5 Pvalb Sncg Sst Vip

Mecom\_3

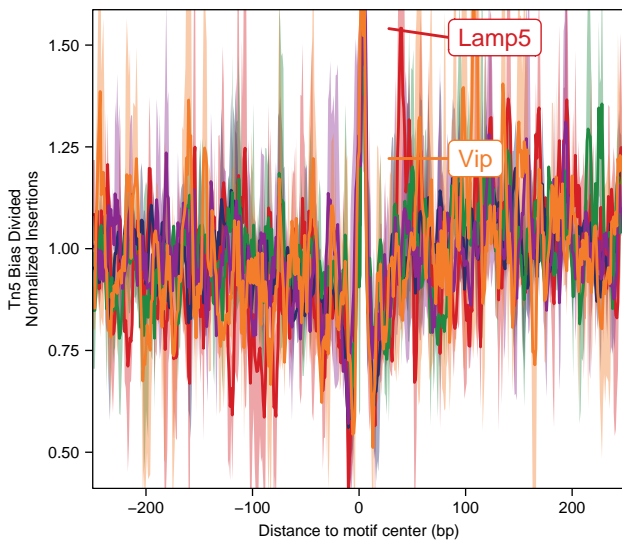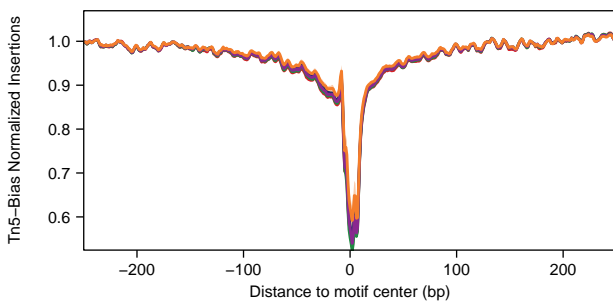

group ■ Lamp5 ■ Pvalb ■ Sneg ■ Sst ■ Vip

Pax2\_4

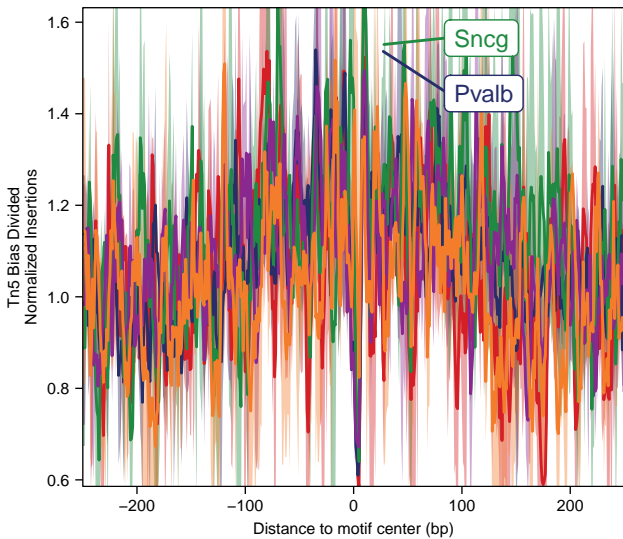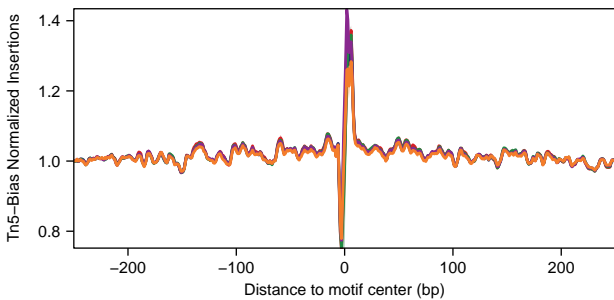

group Lamp5 Pvalb Sncg Sst Vip

Sox17\_5

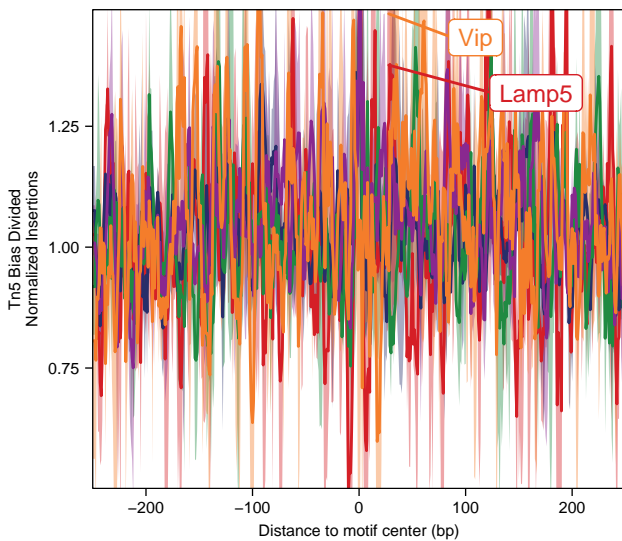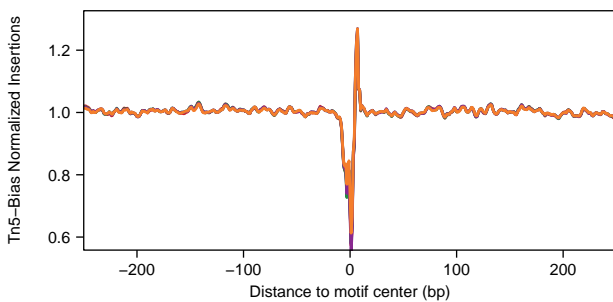

group ■ Lamp5 ■ Pvalb ■ Sncg ■ Sst ■ Vip

Sox5\_6

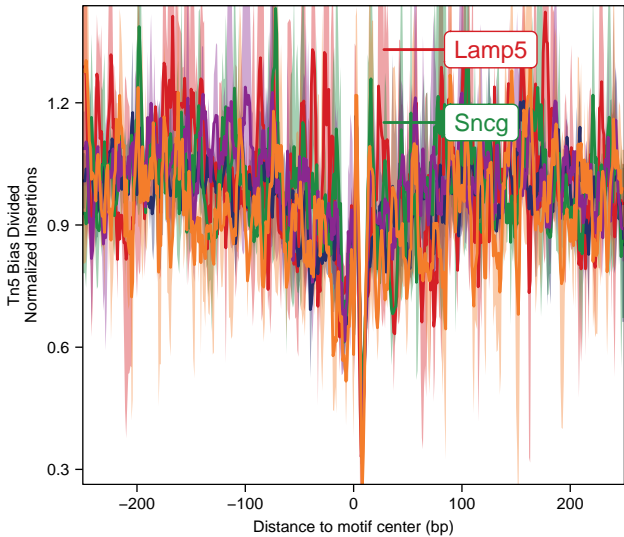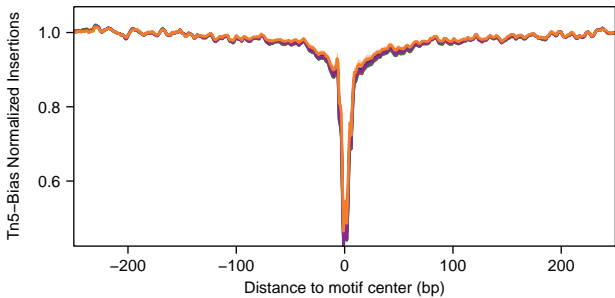

group Lamp5 Pvalb Sncg Sst Vip

Hand1..Tcf3\_7

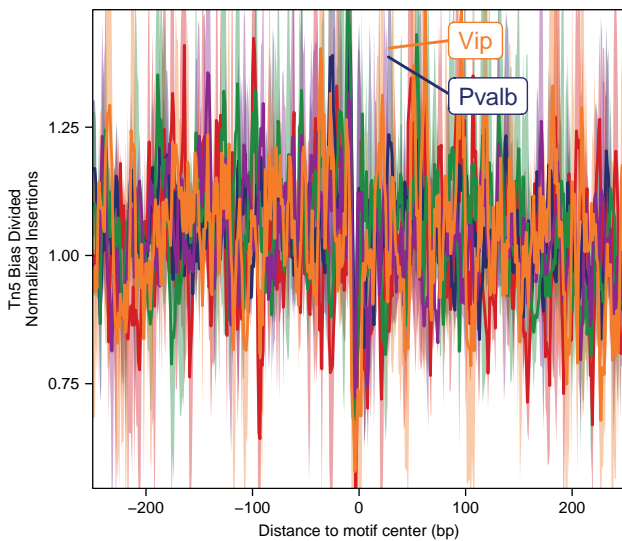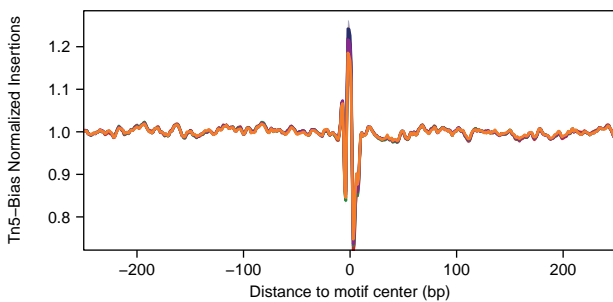

group Lamp5 Pvalb SnCG Sst Vip

Spz1\_8

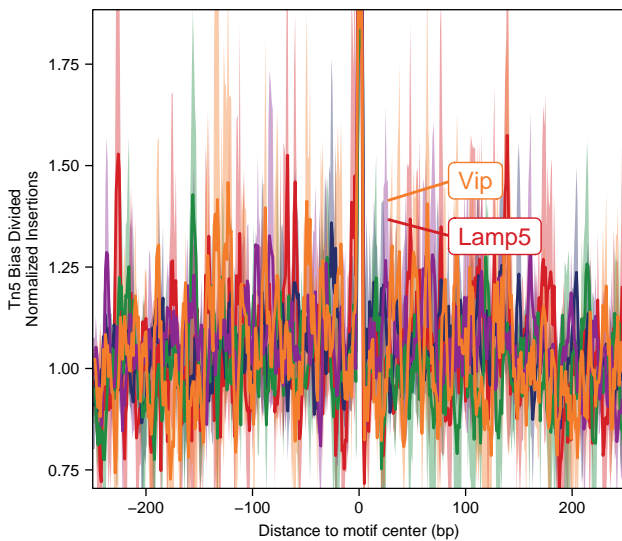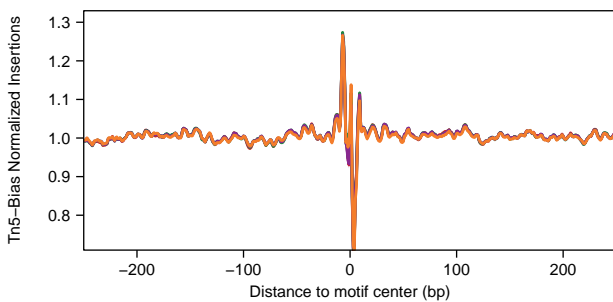

group Lamp5 Pvalb Sncg Sst Vip



Nobox\_9

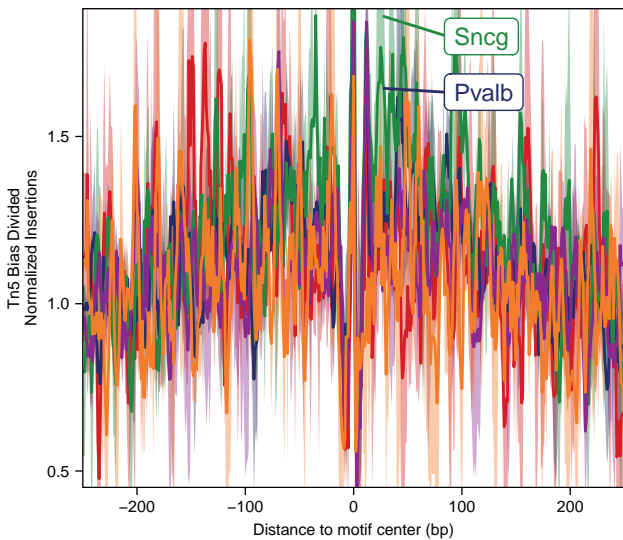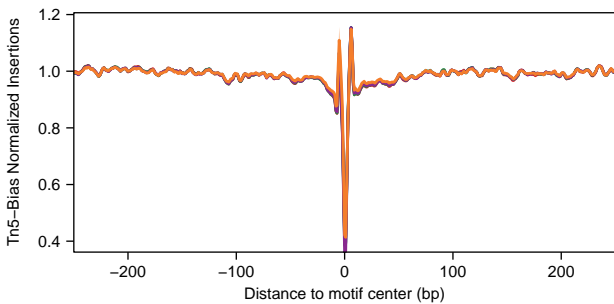

group Lamp5 Pvalb Sncg Sst Vip

Lhx3\_10

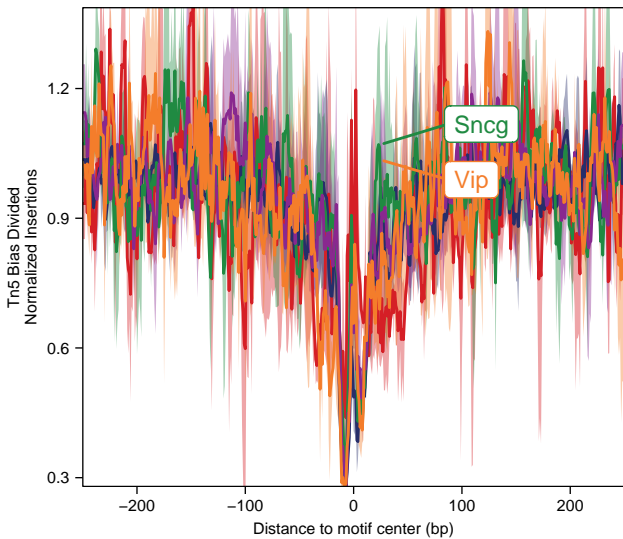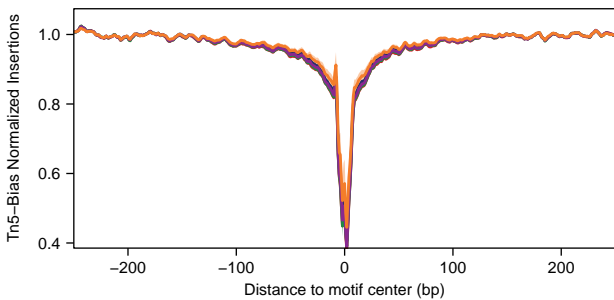

group Lamp5 Pvalb Sncg Sst Vip

Pou5f1..Sox2\_11

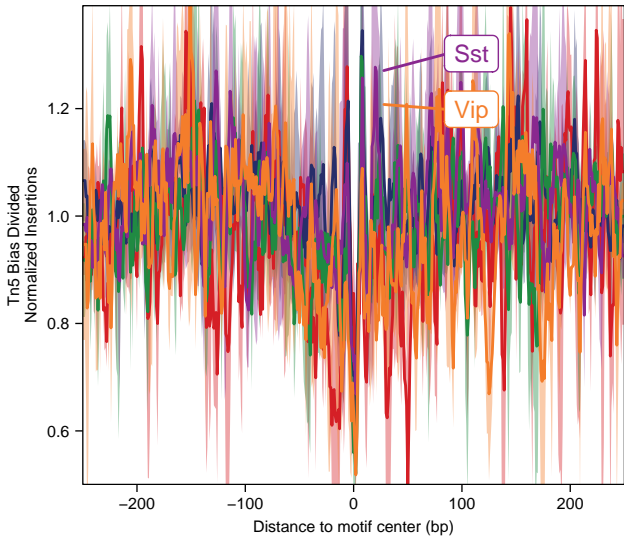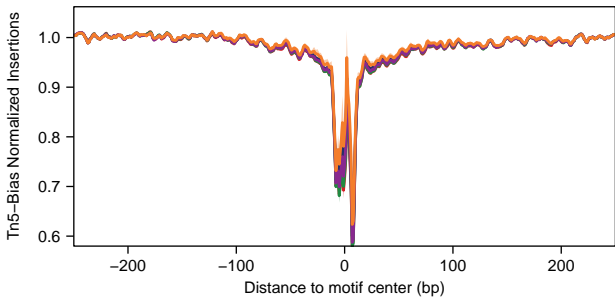

group Lamp5 Pvalb SnCG Sst Vip

RUNX1\_12

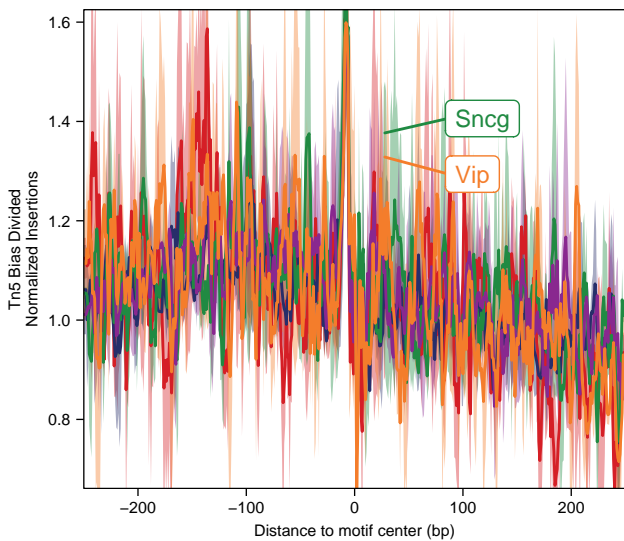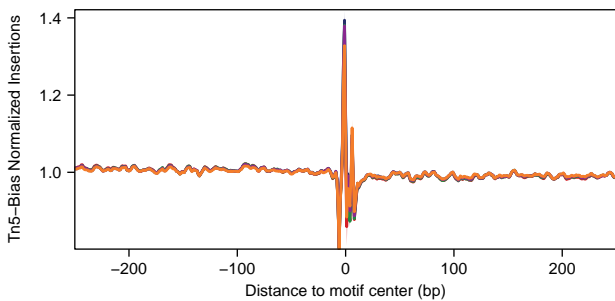

group Lamp5 Pvalb Sncg Sst Vip

Pparg..Rxra\_13

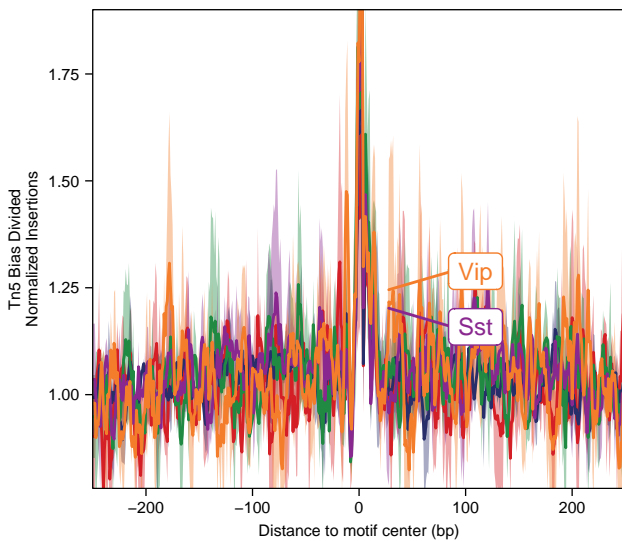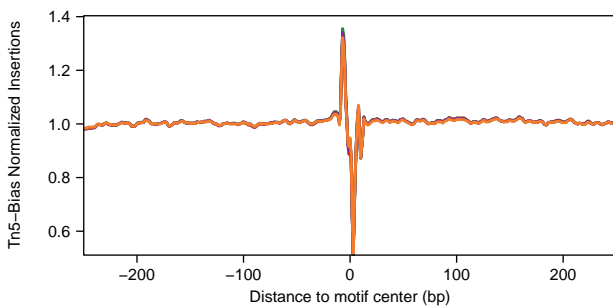

group ■ Lamp5 ■ Pvalb ■ Sneg ■ Sst ■ Vip

Arid3a\_14

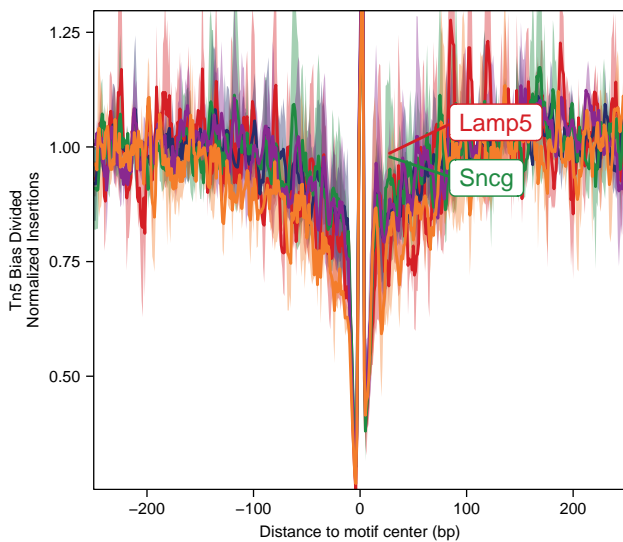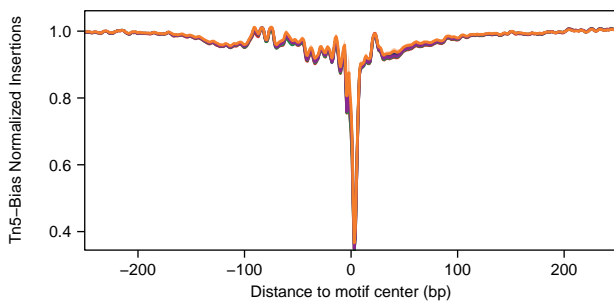

group ■ Lamp5 ■ Pvalb ■ Sncg ■ Sst ■ Vip

NFATC2\_15

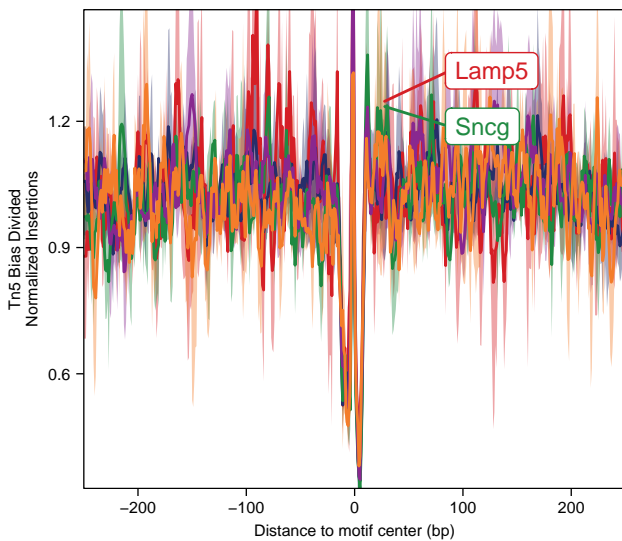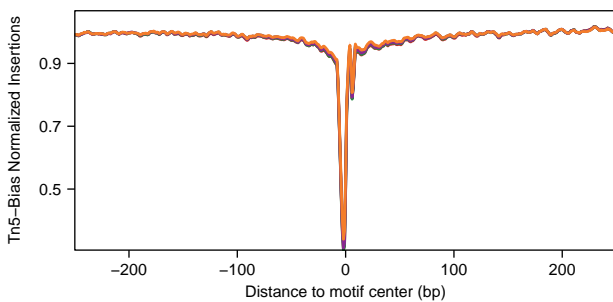

group Lamp5 Pvalb Sncg Sst Vip

NR4A2\_16

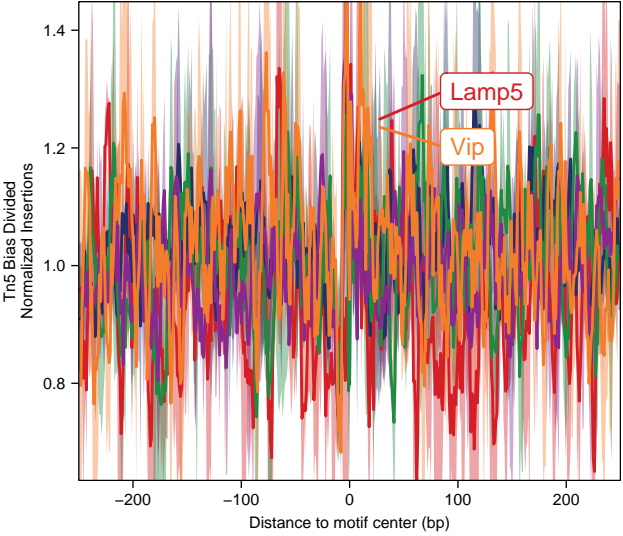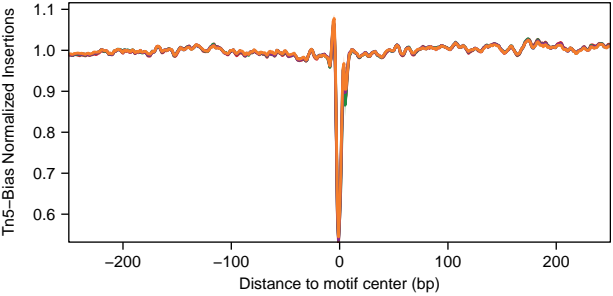

group Lamp5 Pvalb Sncg Sst Vip



Nr2e3\_17

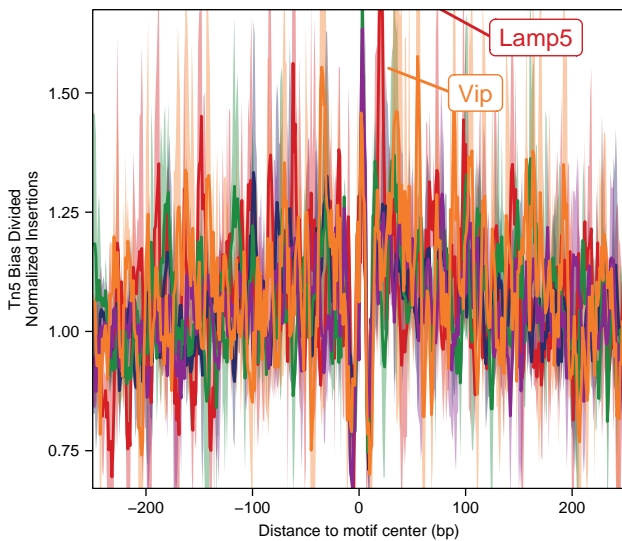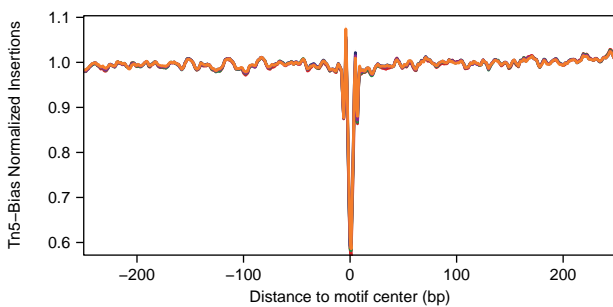

group Lamp5 Pvalb Sncg Sst Vip

ARNT..HIF1A\_18

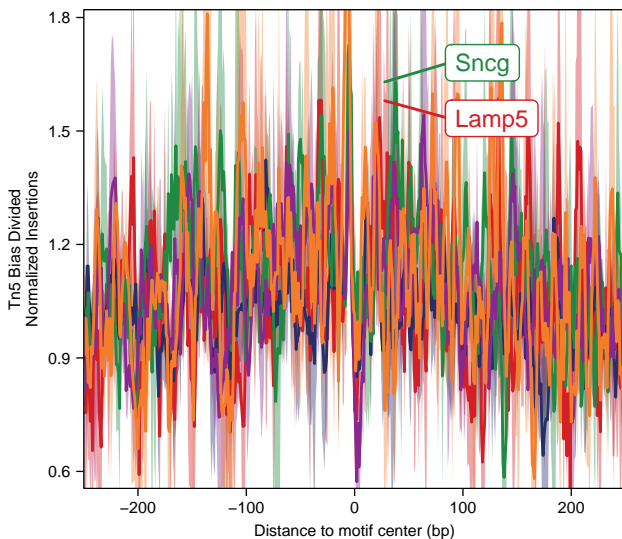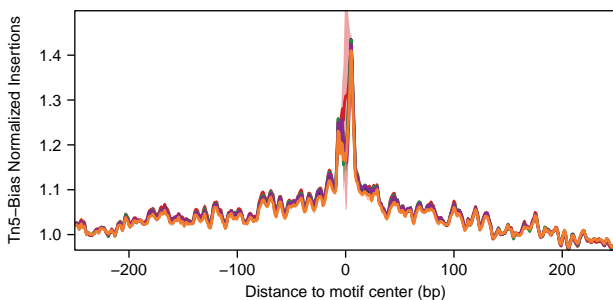

group Lamp5 Pvalb Sncg Sst Vip

Zfx\_19

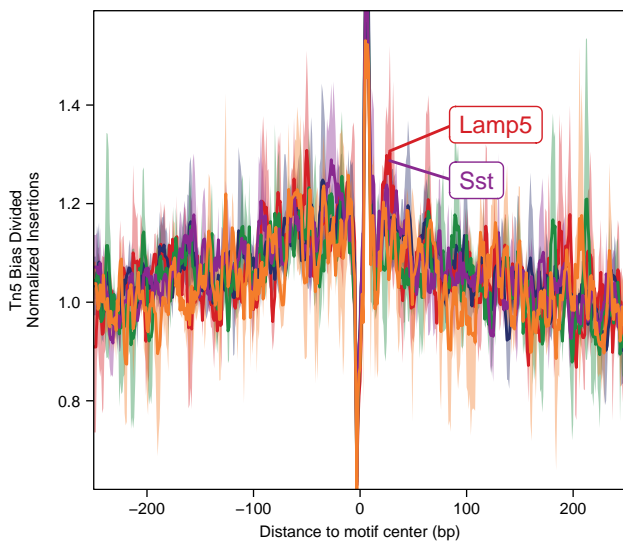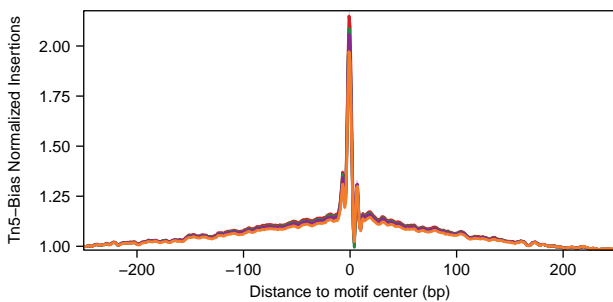

group ■ Lamp5 ■ Pvalb ■ SnCG ■ Sst ■ Vip

Crx\_20

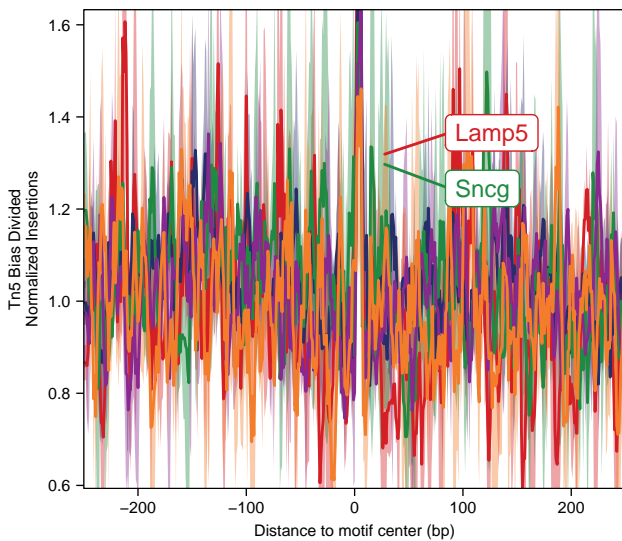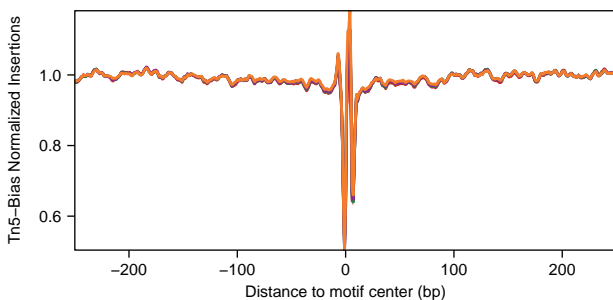

group Lamp5 Pvalb Sncg Sst Vip

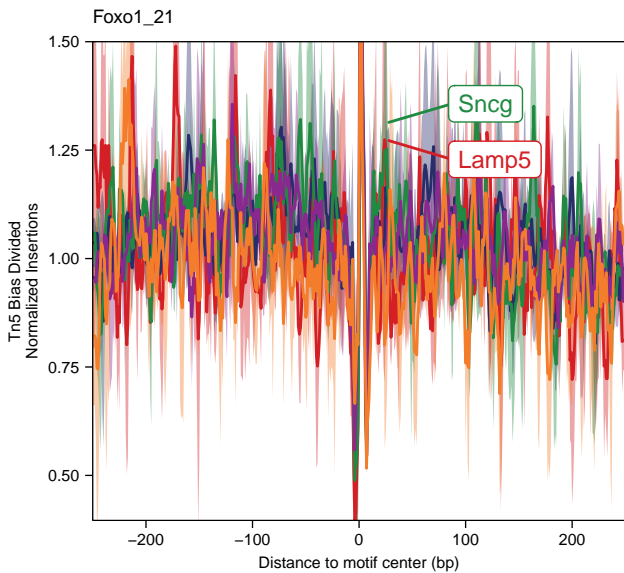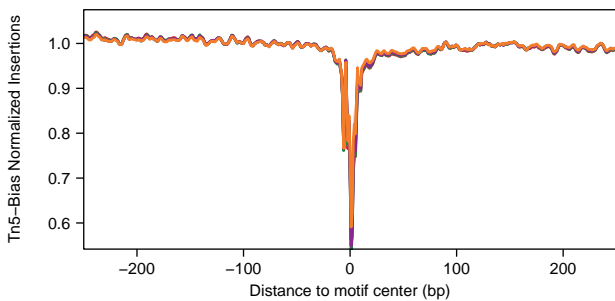

group Lamp5 Pvalb Sncg Sst Vip

Gfi1b\_22

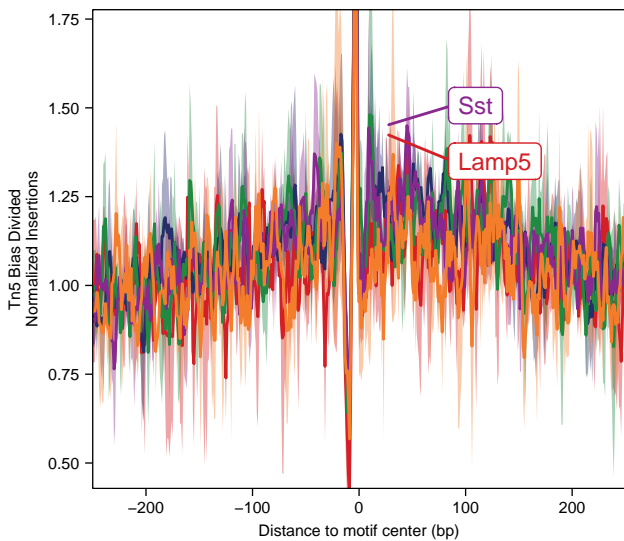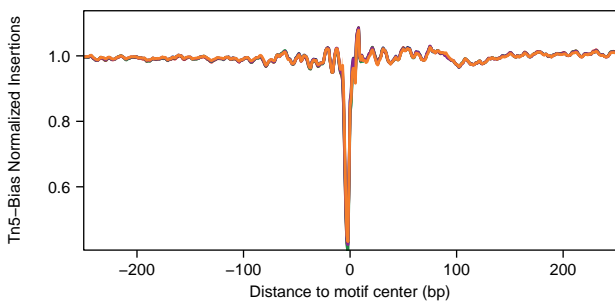

group ■ Lamp5 ■ Pvalb ■ SnCG ■ Sst ■ Vip

Klf1\_23

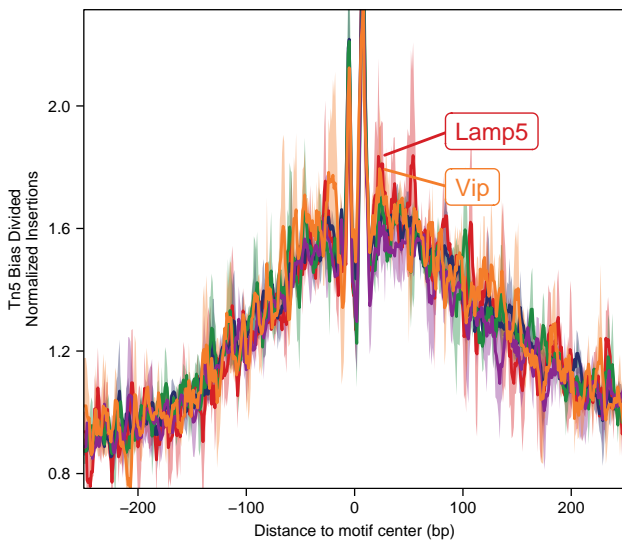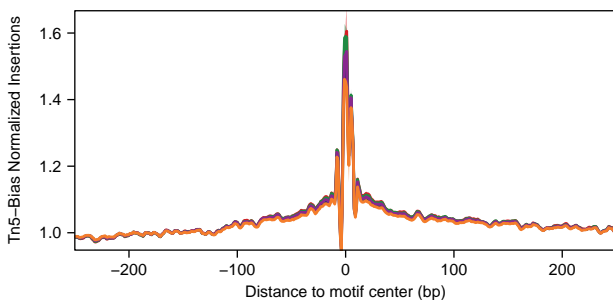

group Lamp5 Pvalb Sncg Sst Vip

Nr1h3..Rxra\_24

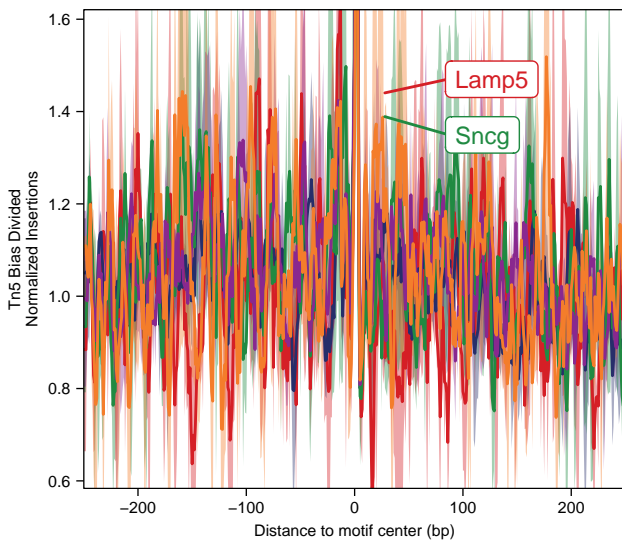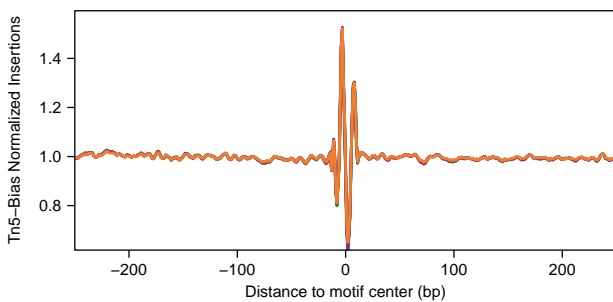

group Lamp5 Pvalb Sncg Sst Vip



Nkx2.5.var.2\_25

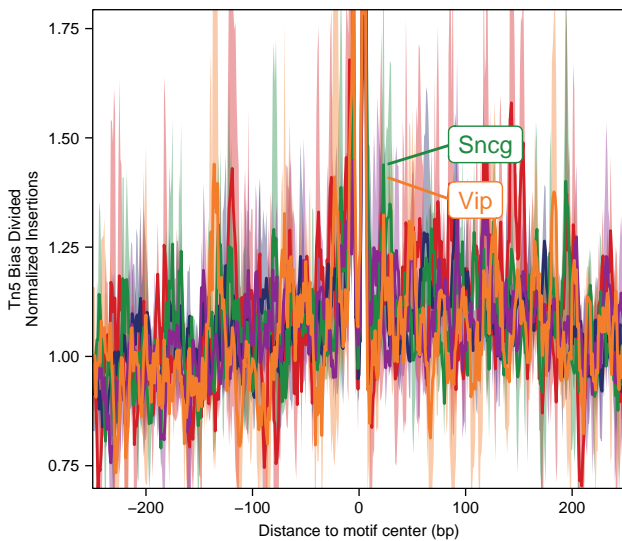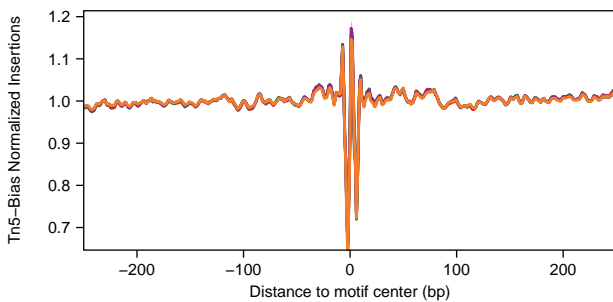

group ■ Lamp5 ■ Pvalb ■ Sncg ■ Sst ■ Vip

Nr5a2\_26

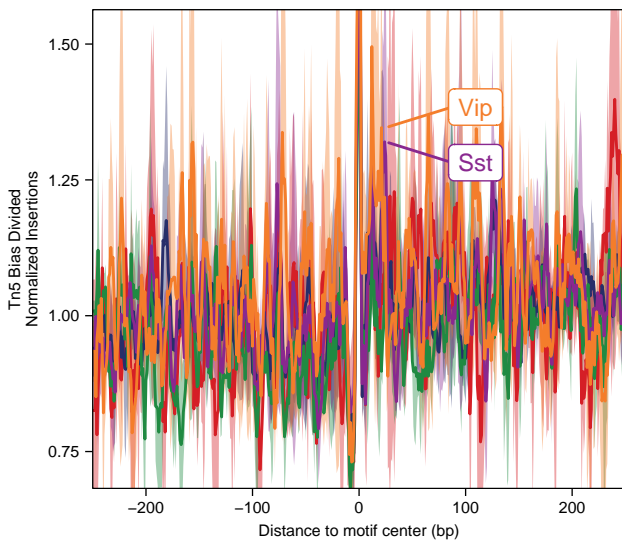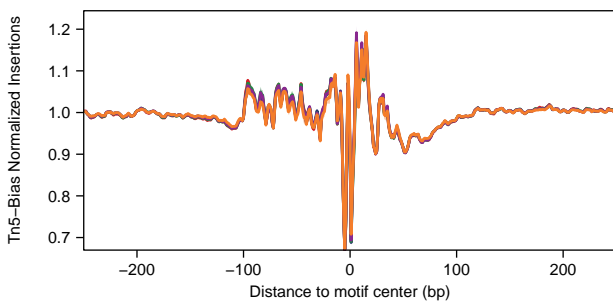

group Lamp5 Pvalb Sneg Sst Vip

Sox3\_27

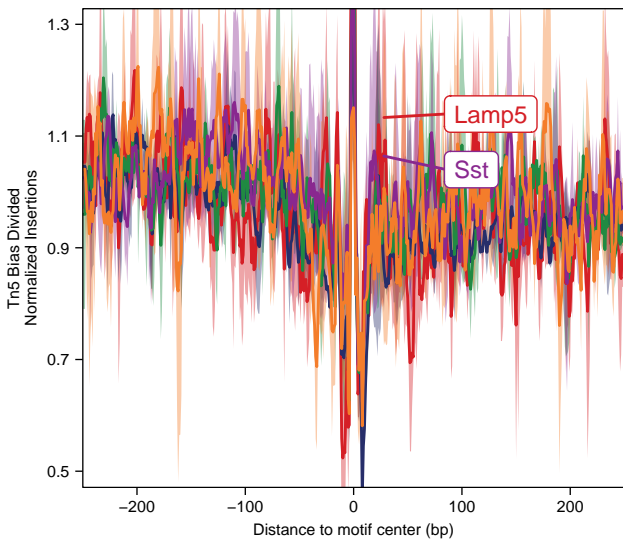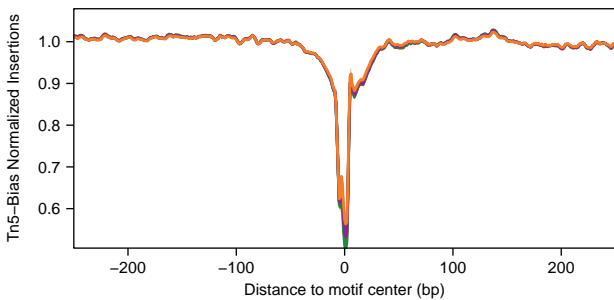

group Lamp5 Pvalb Sncg Sst Vip

Sox6\_28

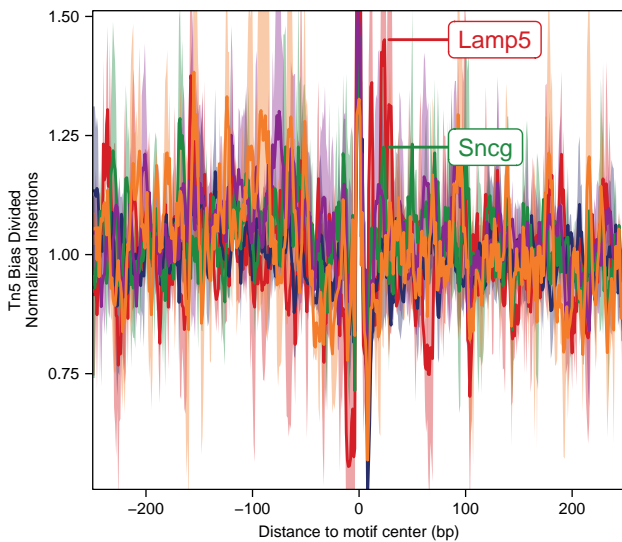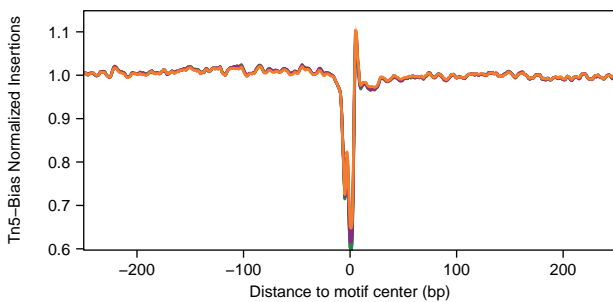

group Lamp5 Pvalb Sncg Sst Vip

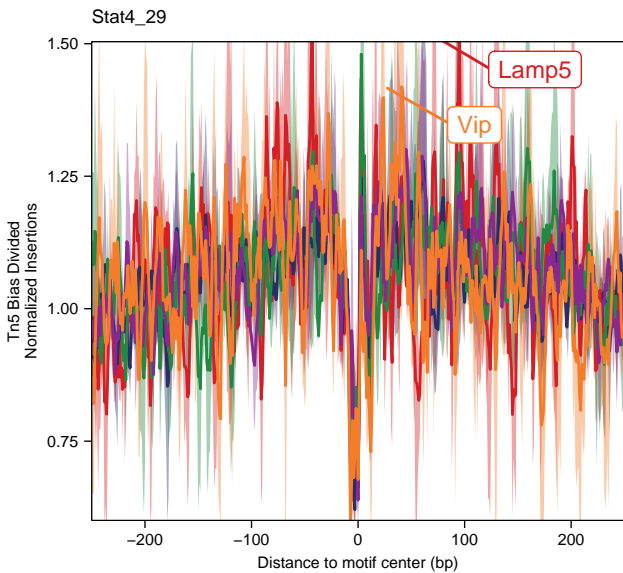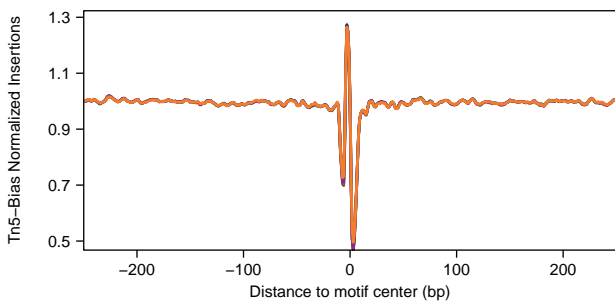

group ■ Lamp5 ■ Pvalb ■ Sncg ■ Sst ■ Vip

Stat5a...Stat5b\_30

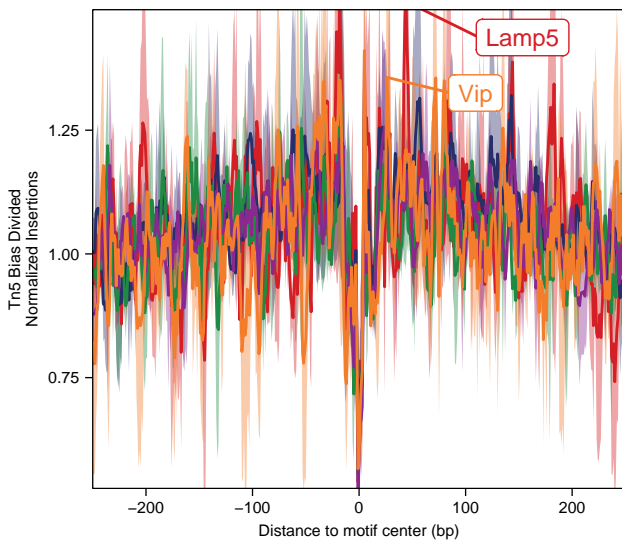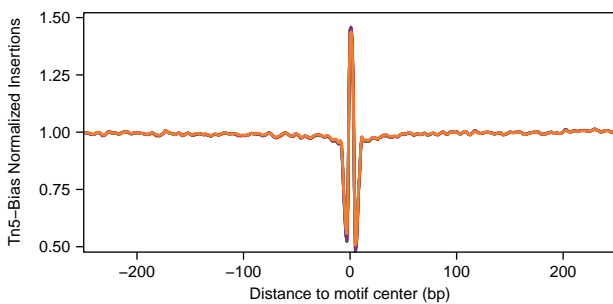

group ■ Lamp5 ■ Pvalb ■ Sncg ■ Sst ■ Vip

Stat6\_31

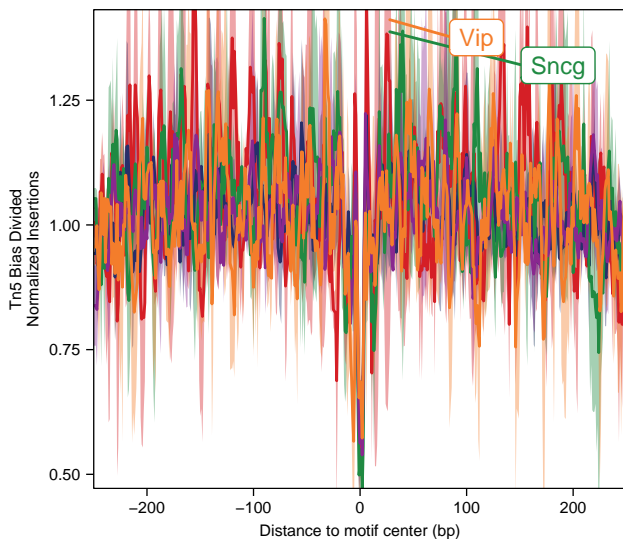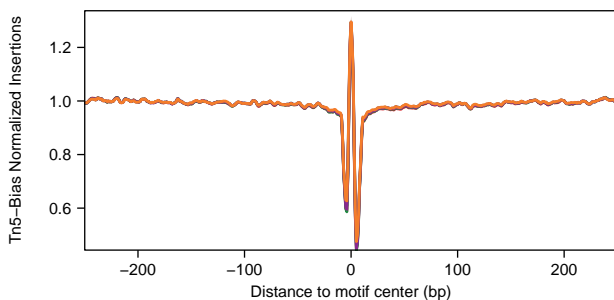

group ■ Lamp5 ■ Pvalb ■ Sncg ■ Sst ■ Vip

Tcf12\_32

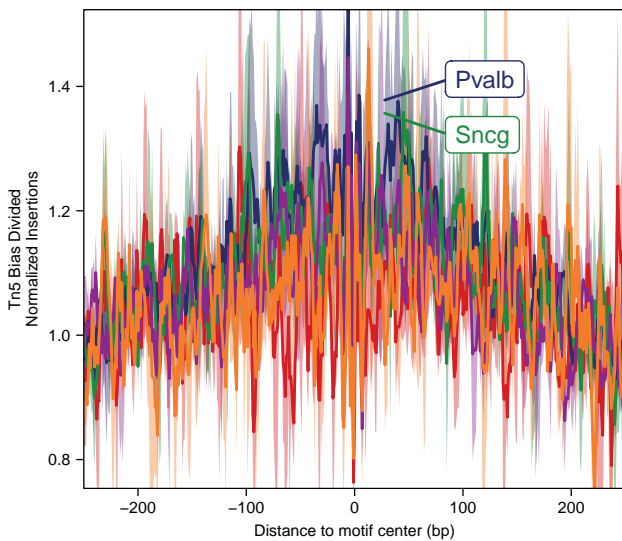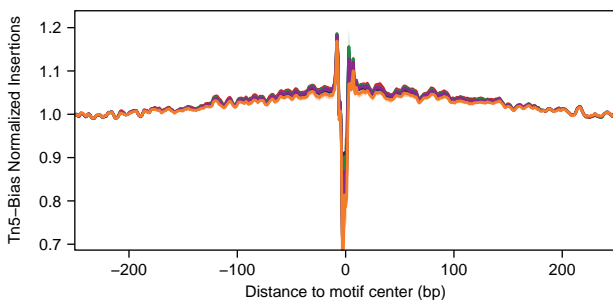

group Lamp5 Pvalb Sncg Sst Vip



Nfe2l2\_33

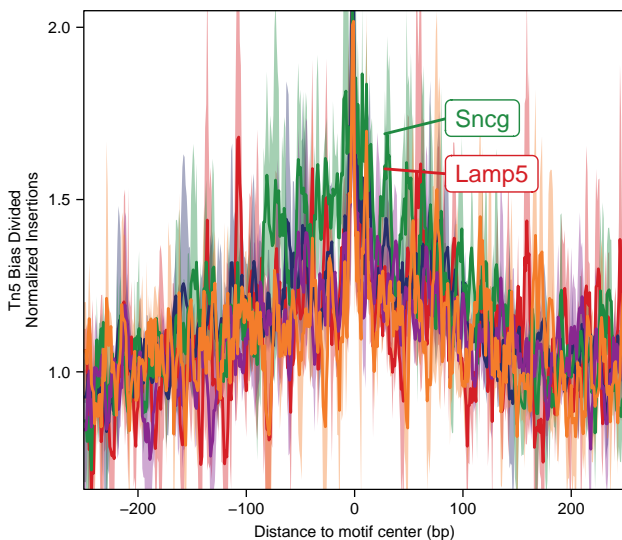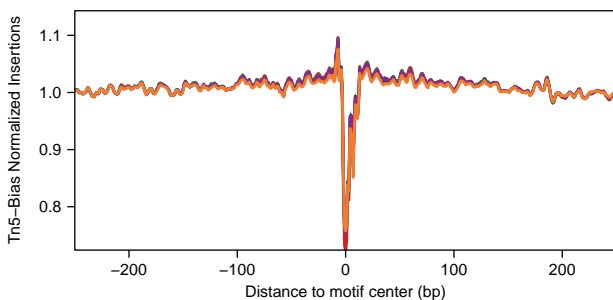

group Lamp5 Pvalb Sncg Sst Vip

Bach1..Mafk\_34

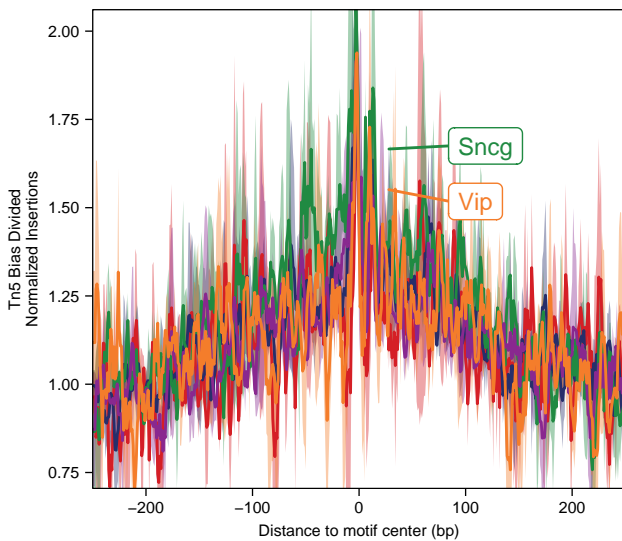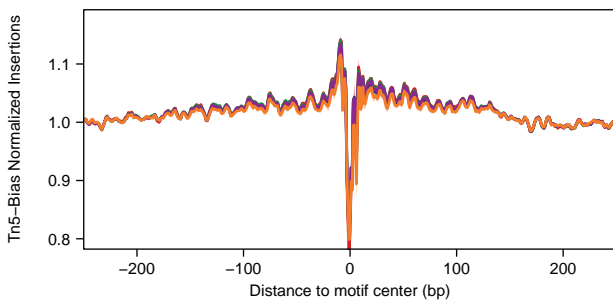

group ■ Lamp5 ■ Pvalb ■ Sncg ■ Sst ■ Vip

Arid3b\_35

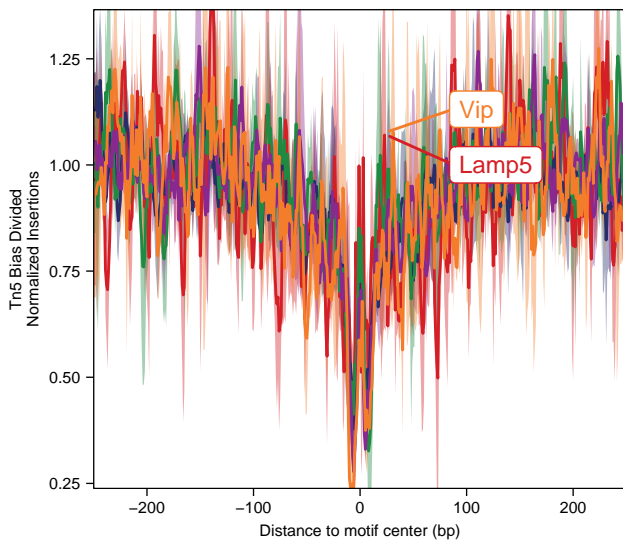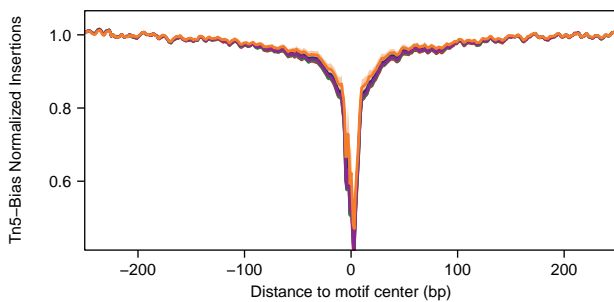

group ■ Lamp5 ■ Pvalb ■ Sncg ■ Sst ■ Vip

Arid5a\_36

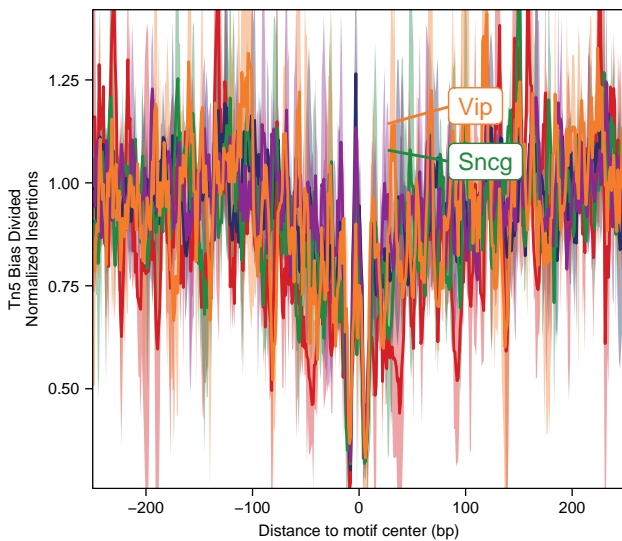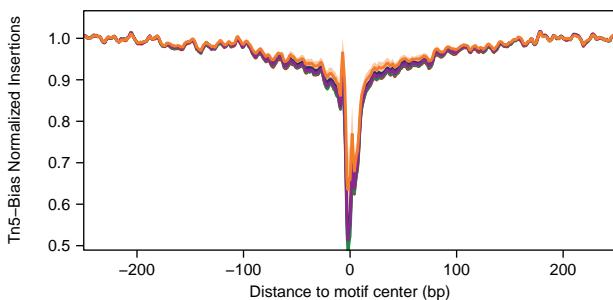

group ■ Lamp5 ■ Pvalb ■ Sncg ■ Sst ■ Vip

Arntl\_37

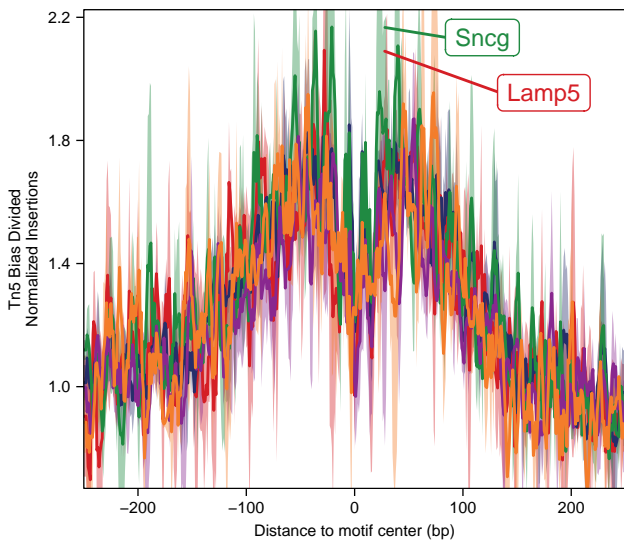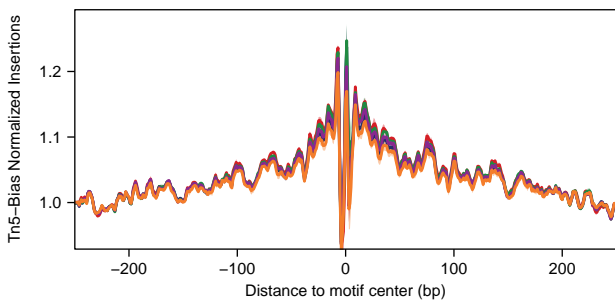

group Lamp5 Pvalb Sncg Sst Vip

Atf1\_38

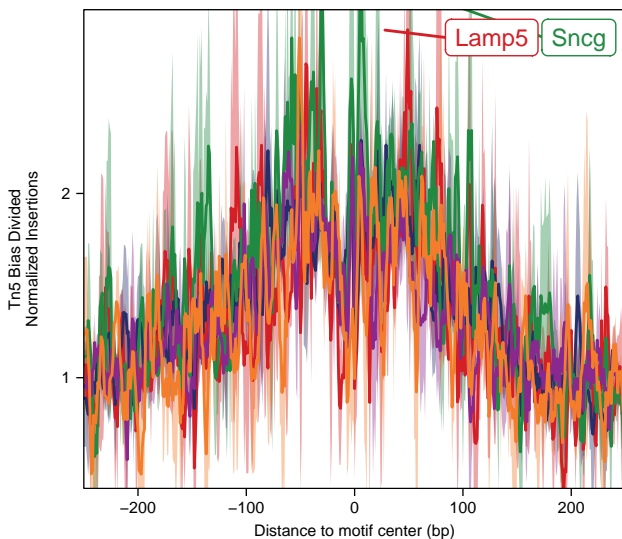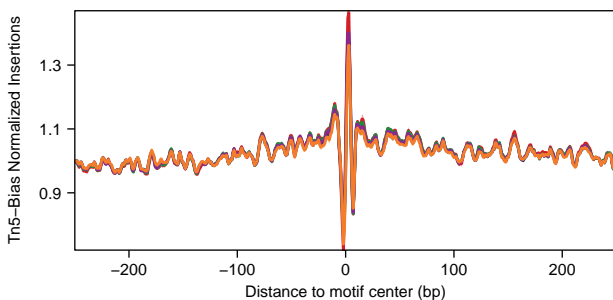

group Lamp5 Pvalb Sncg Sst Vip

Bhlha15\_39

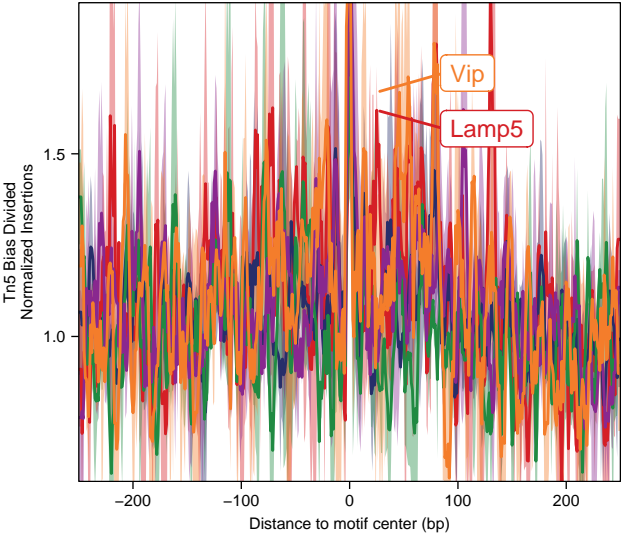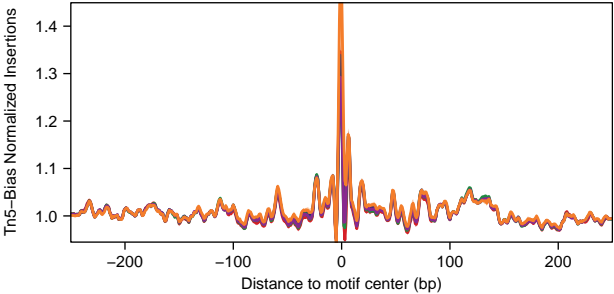

group Lamp5 Pvalb Sncg Sst Vip

Creb3l2\_40

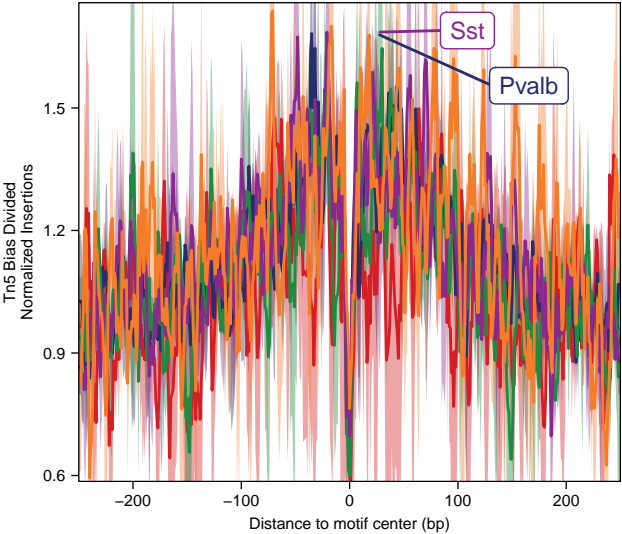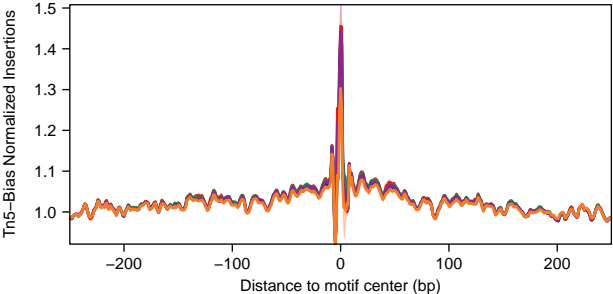

group Lamp5 Pvalb SnCG Sst Vip



Dux\_41

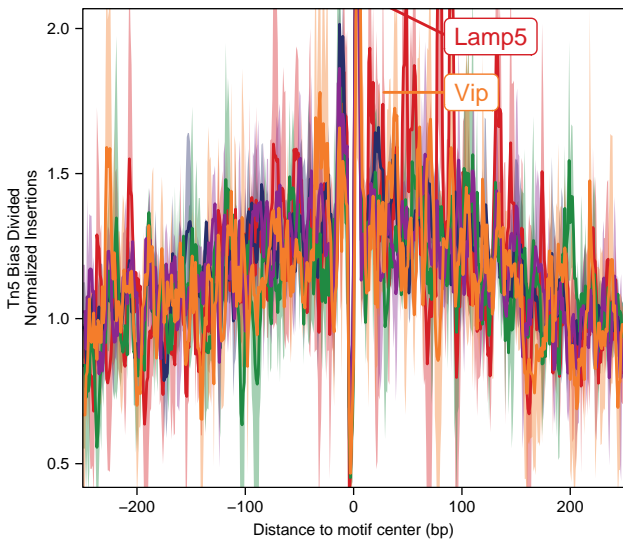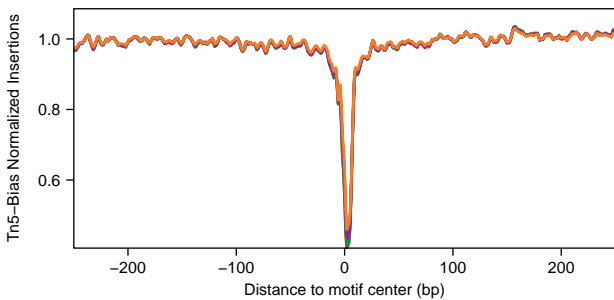

group Lamp5 Pvalb Sncg Sst Vip

Foxj2\_42

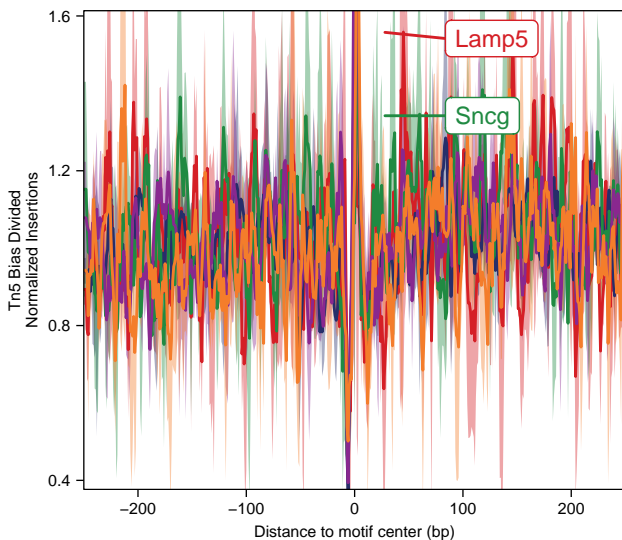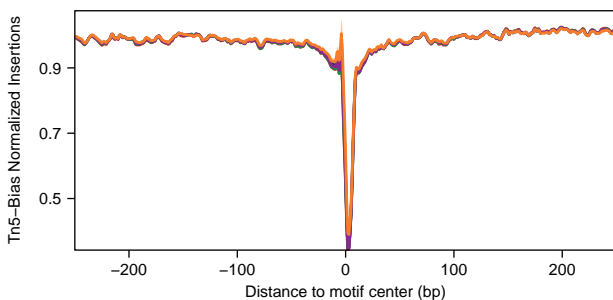

group Lamp5 Pvalb Sncg Sst Vip

Gmeb1\_43

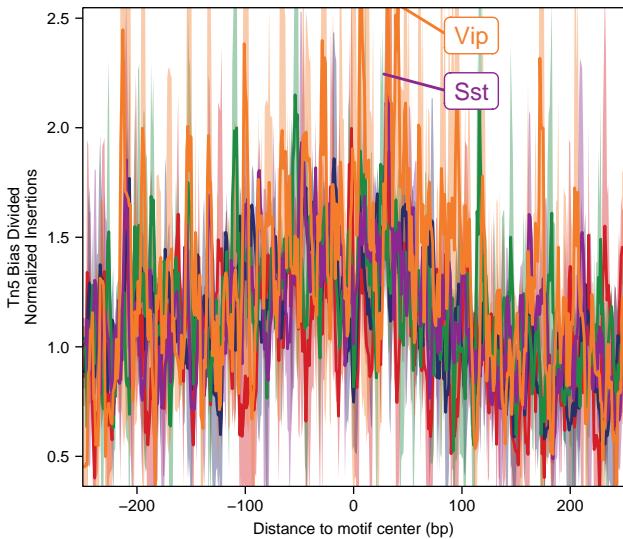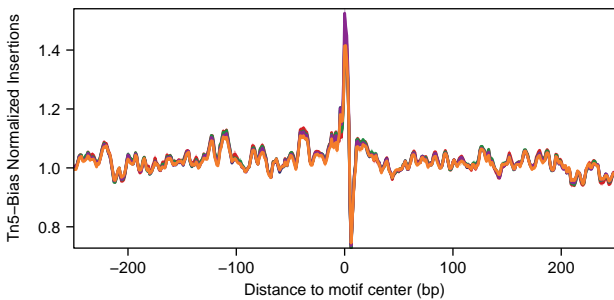

group Lamp5 Pvalb Sncg Sst Vip

Mlxip\_44

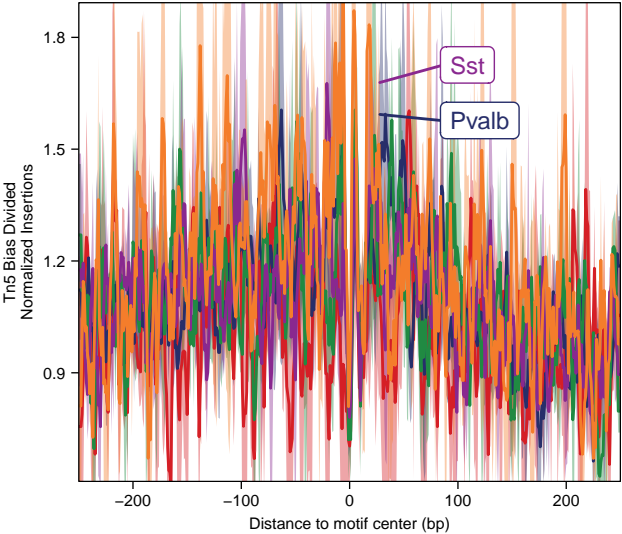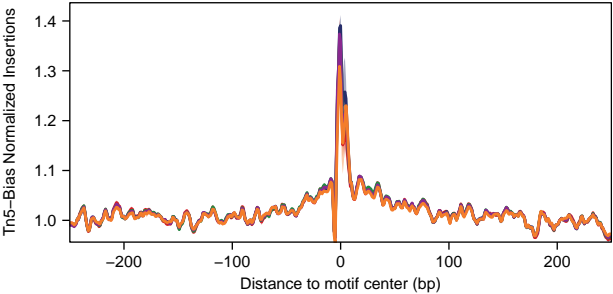

group Lamp5 Pvalb Snrg Sst Vip

Npas2\_45

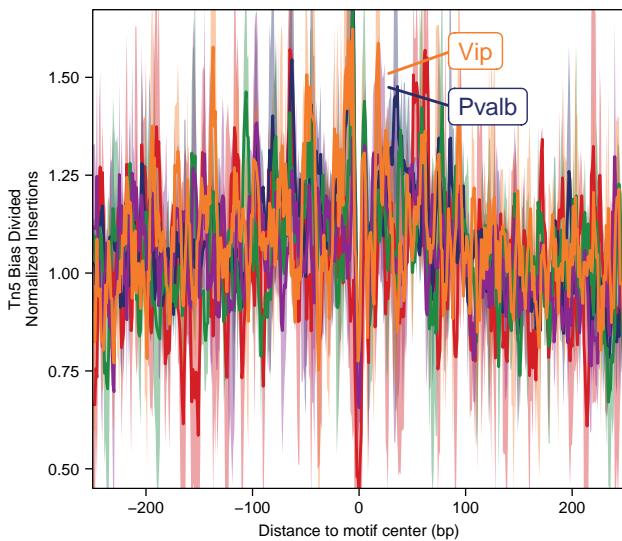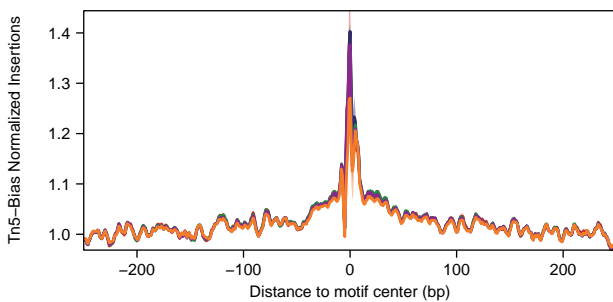

group ■ Lamp5 ■ Pvalb ■ Sncg ■ Sst ■ Vip

Rhox11\_46

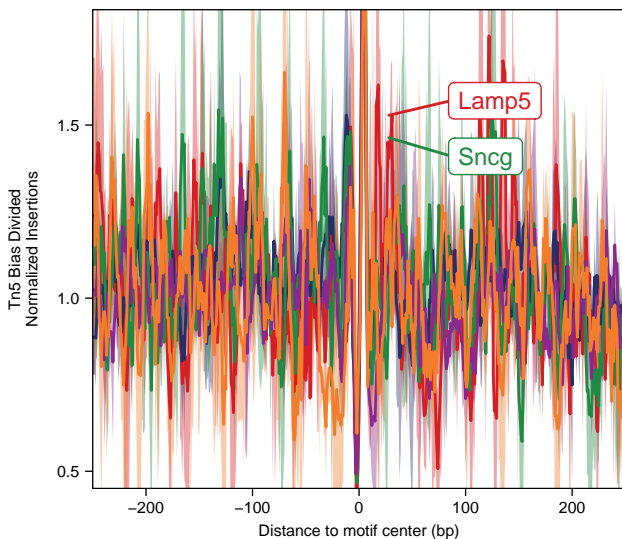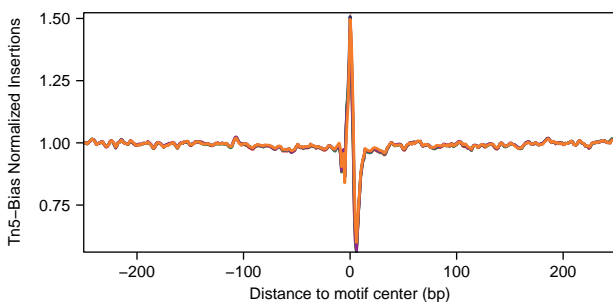

group ■ Lamp5 ■ Pvalb ■ Sncg ■ Sst ■ Vip

Six3\_47

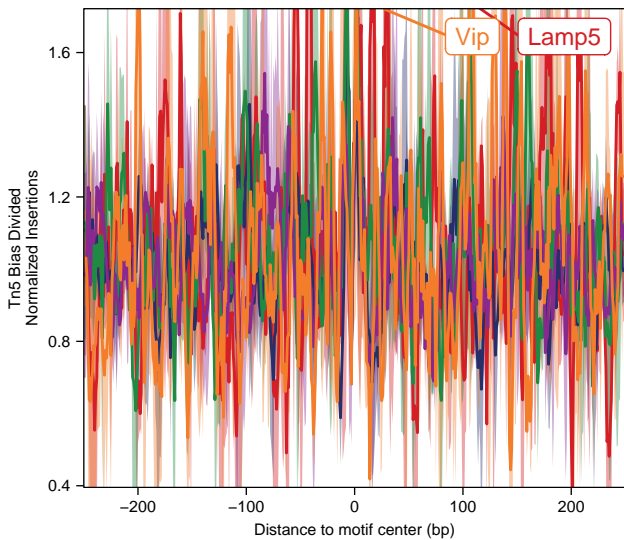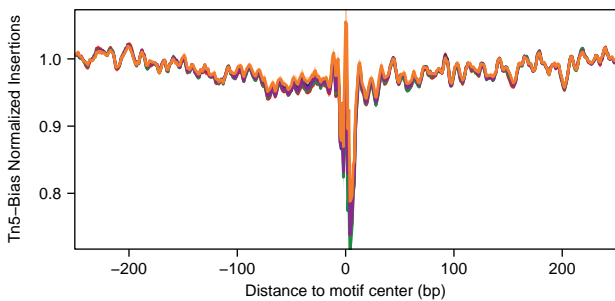

group Lamp5 Pvalb Sncg Sst Vip

Twist2\_48

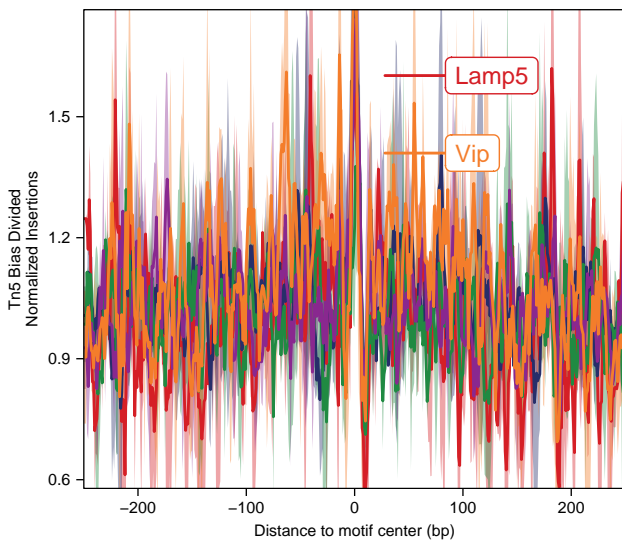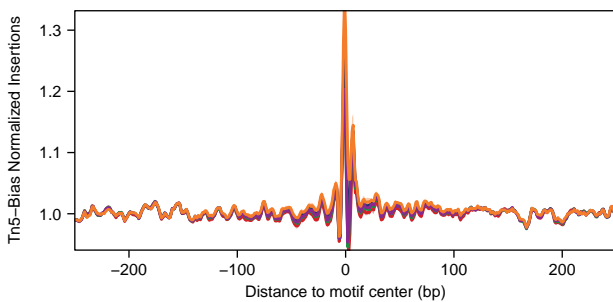

group Lamp5 Pvalb Sncg Sst Vip



Ar\_49

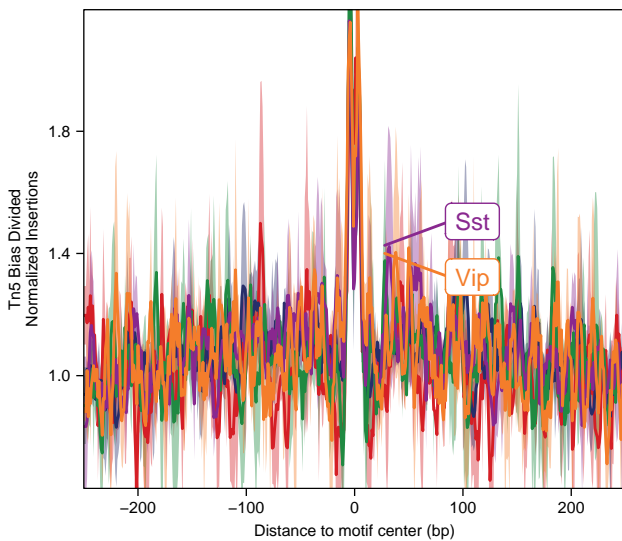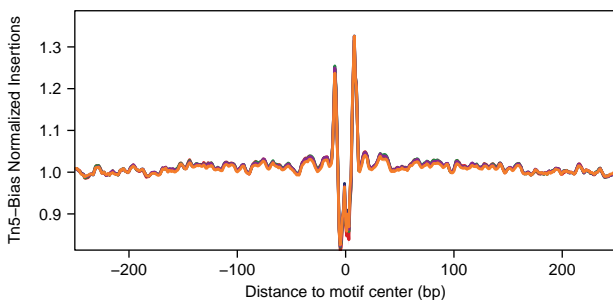

group Lamp5 Pvalb SnCG Sst Vip

Esrrg\_50

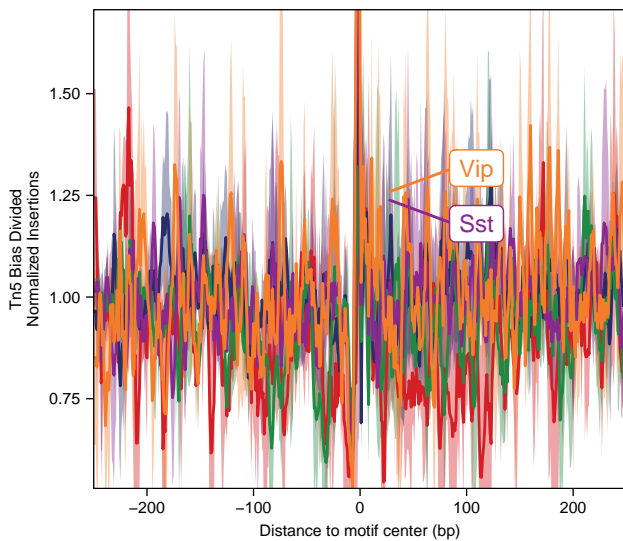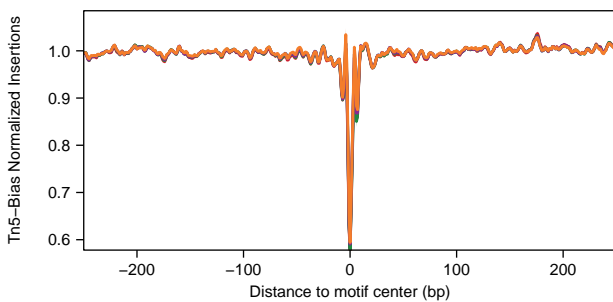

group Lamp5 Pvalb Sneg Sst Vip

Nr2e1\_51

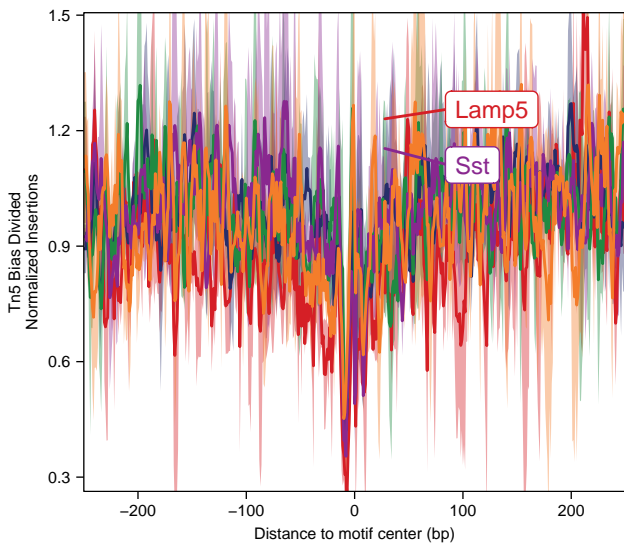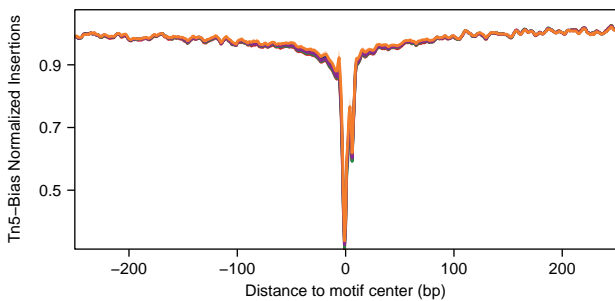

group Lamp5 Pvalb Sncg Sst Vip

Nr2f6\_52

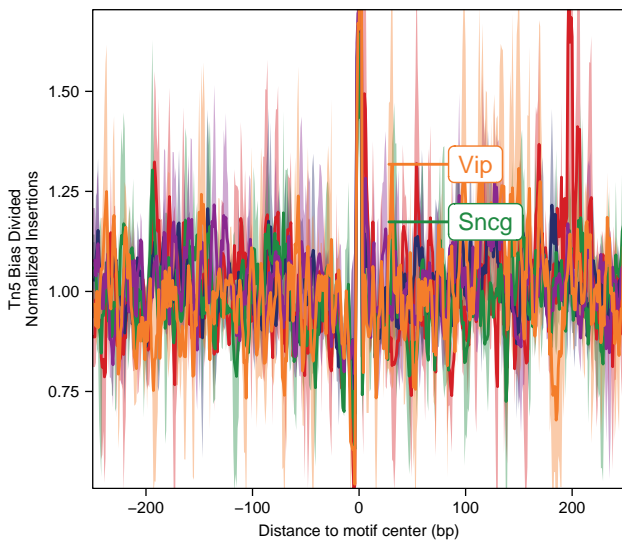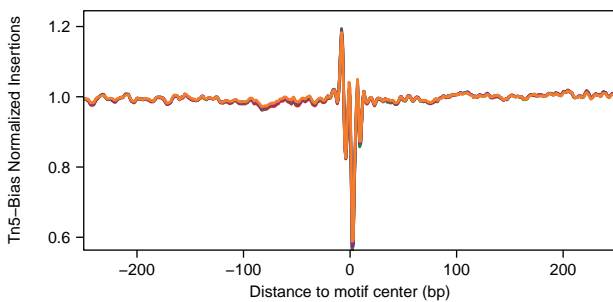

group ■ Lamp5 ■ Pvalb ■ Sncg ■ Sst ■ Vip

Rxra\_53

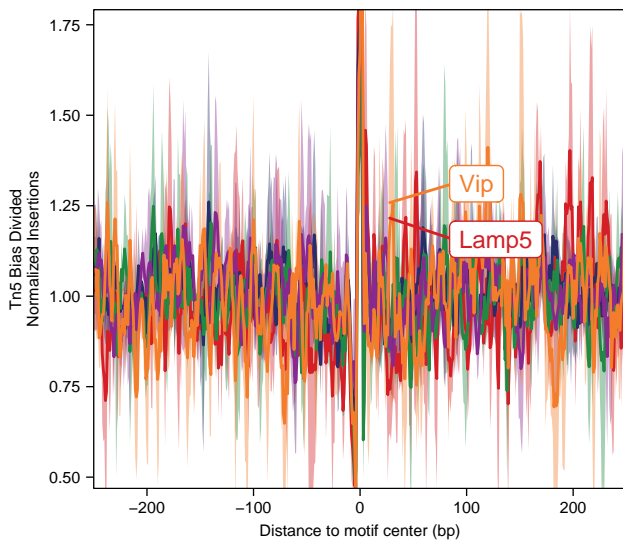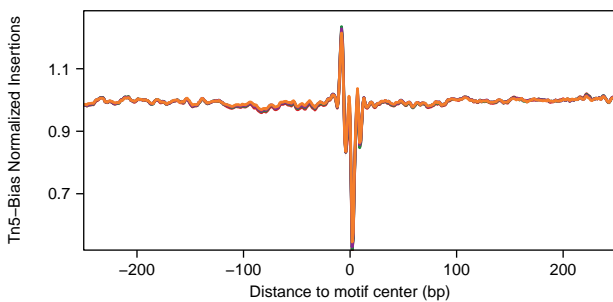

group ■ Lamp5 ■ Pvalb ■ Sncg ■ Sst ■ Vip

Lhx4\_54

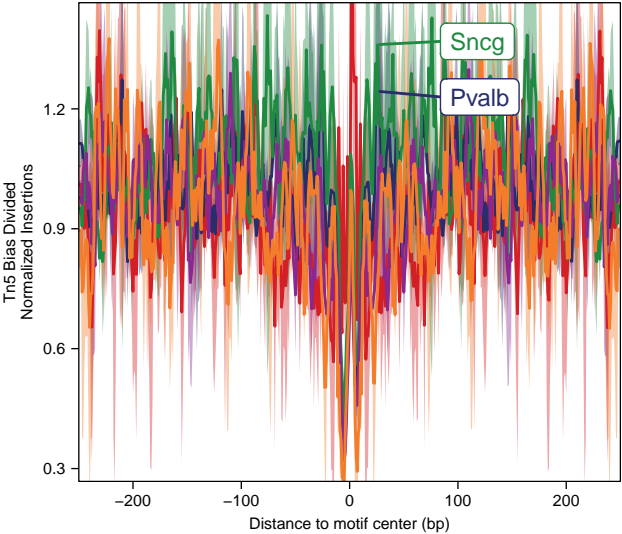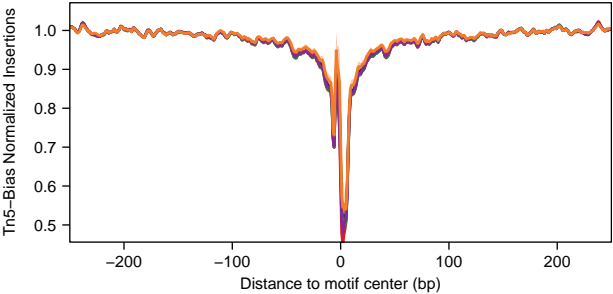

group Lamp5 Pvalb Sncg Sst Vip

Lhx8\_55

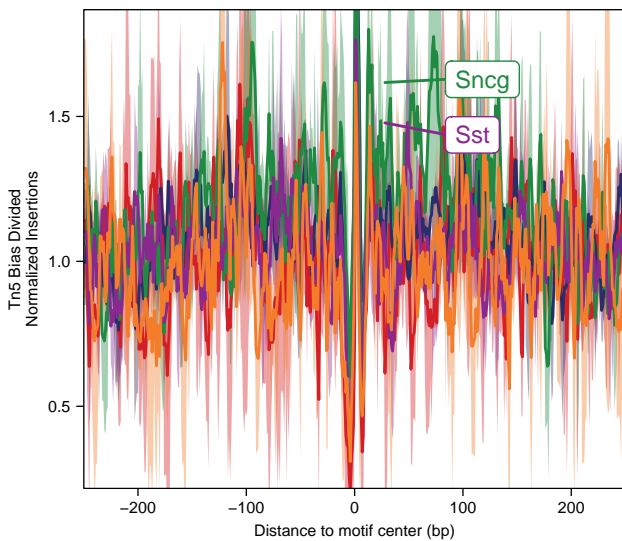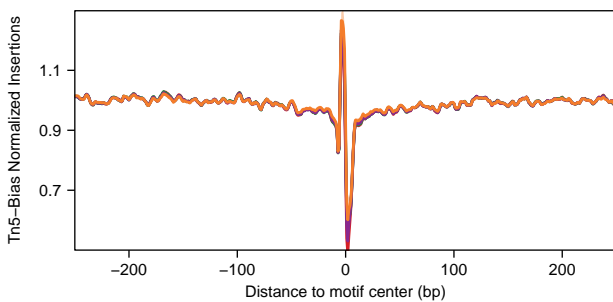

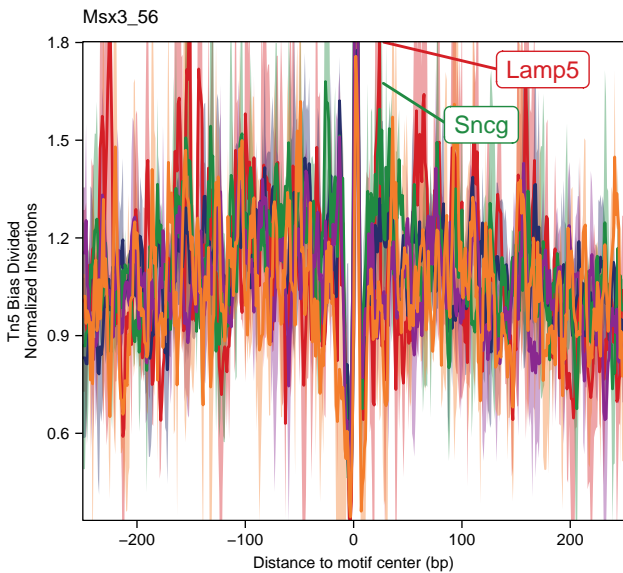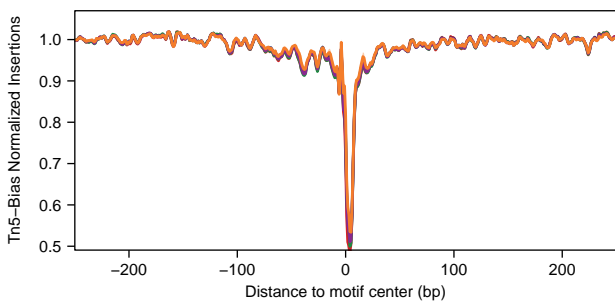

group Lamp5 Pvalb Sncg Sst Vip



Nkx3.1\_57

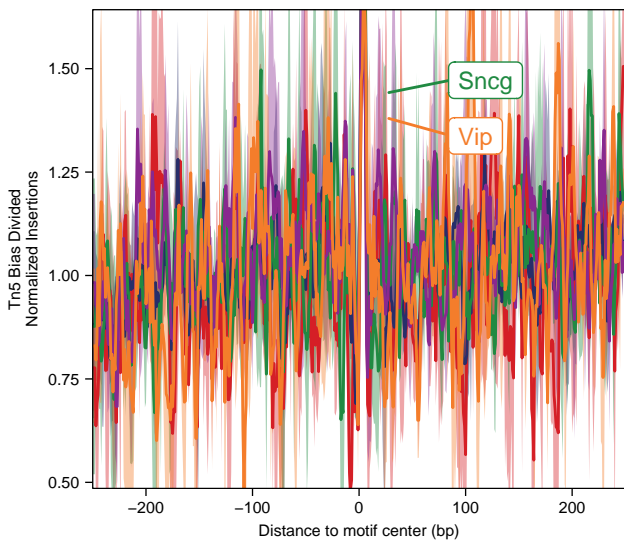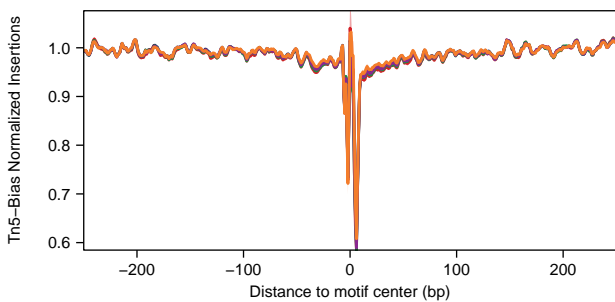

group Lamp5 Pvalb Sncg Sst Vip

Shox2\_58

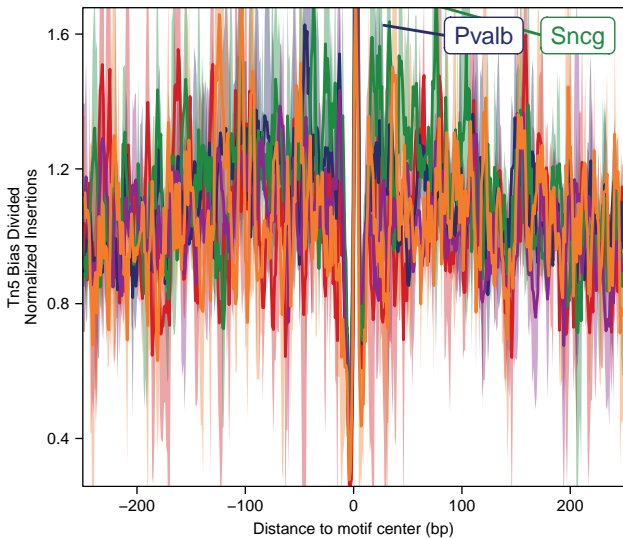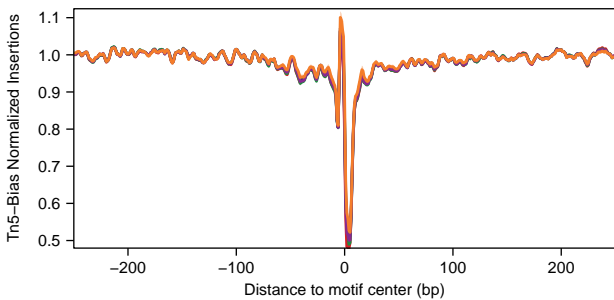

group Lamp5 Pvalb Sncg Sst Vip

Nr2f6.var.2\_59

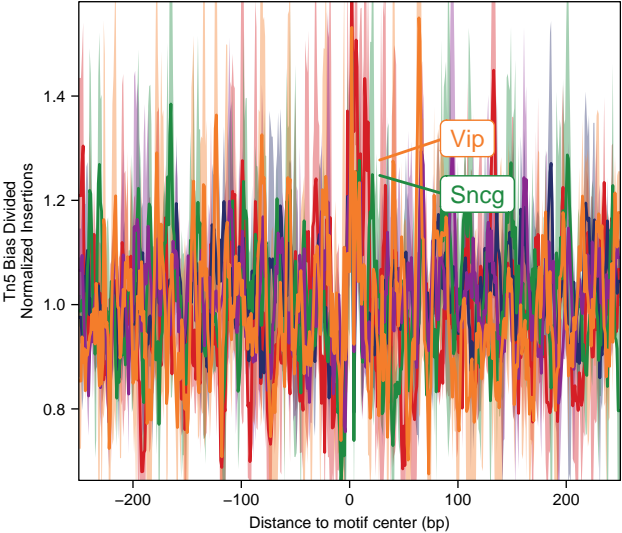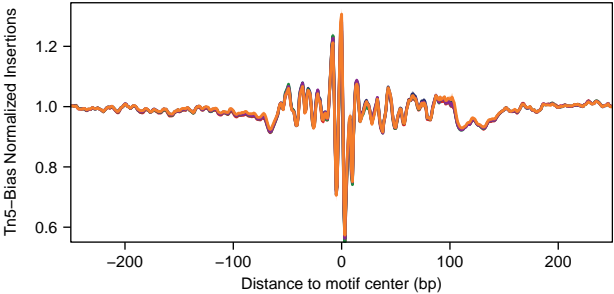

group Lamp5 Pvalb Sncg Sst Vip

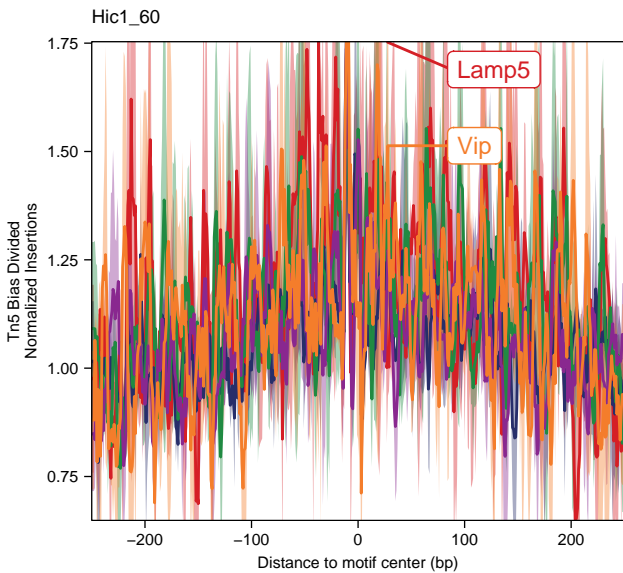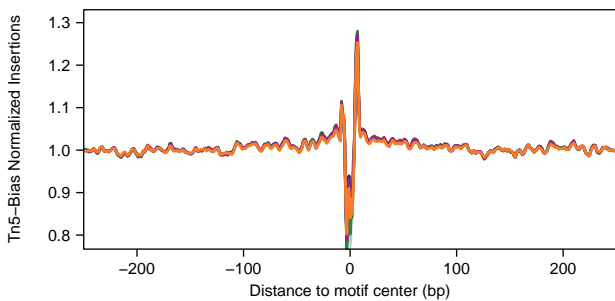

group Lamp5 Pvalb Sncg Sst Vip

Klf12\_61

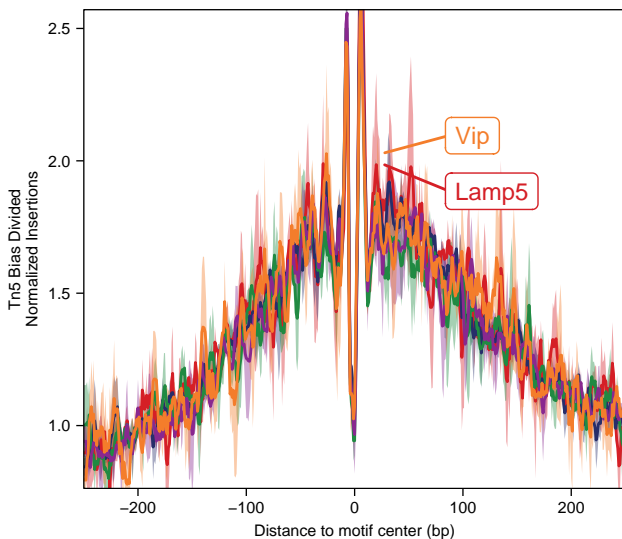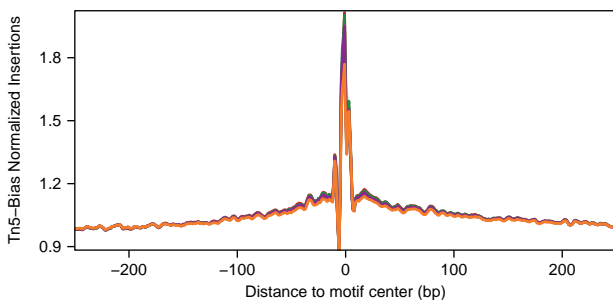

group Lamp5 Pvalb Sncg Sst Vip

Ascl2\_62

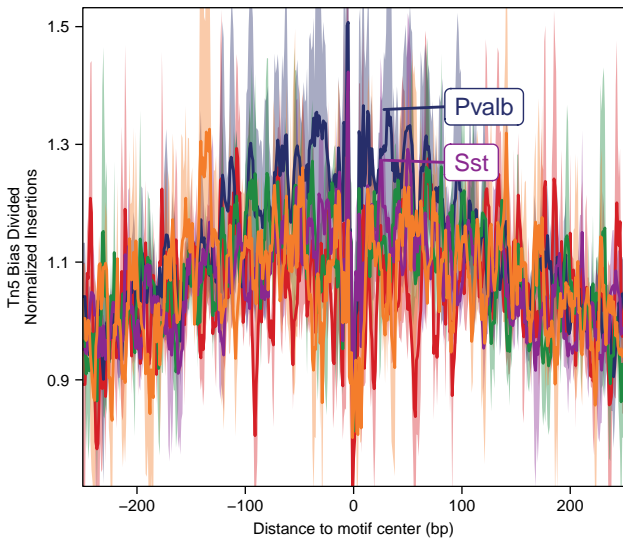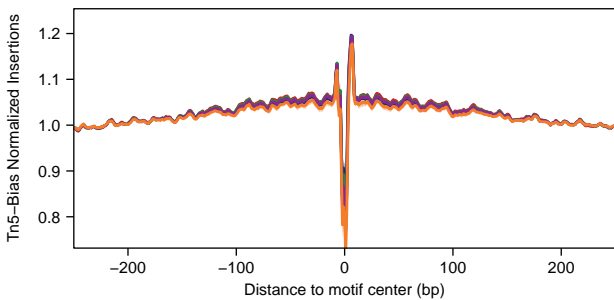

group Lamp5 Pvalb SnCG Sst Vip

Atoh1\_63

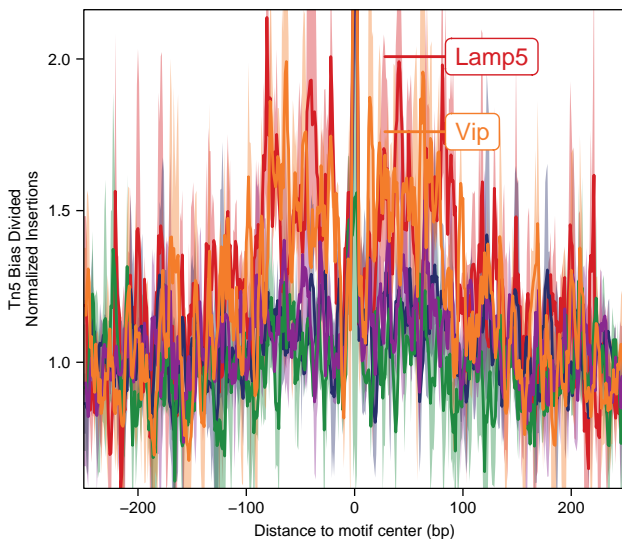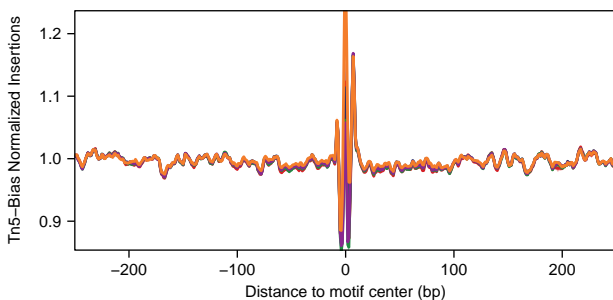

group Lamp5 Pvalb Sncg Sst Vip

Tcf21\_64

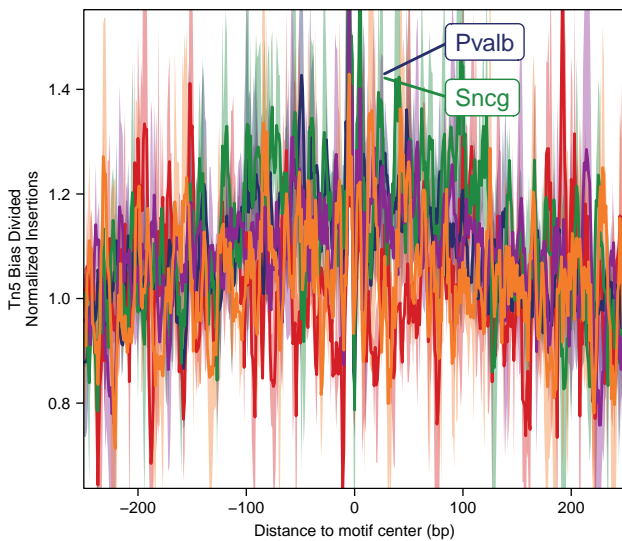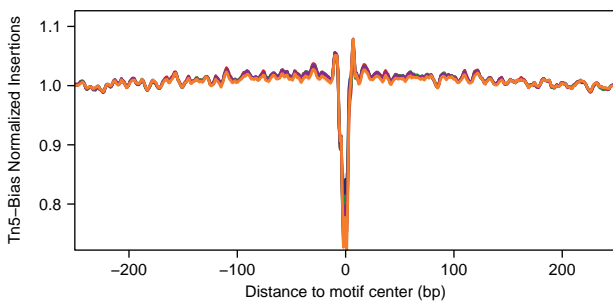

group Lamp5 Pvalb Sncg Sst Vip



Creb5\_65

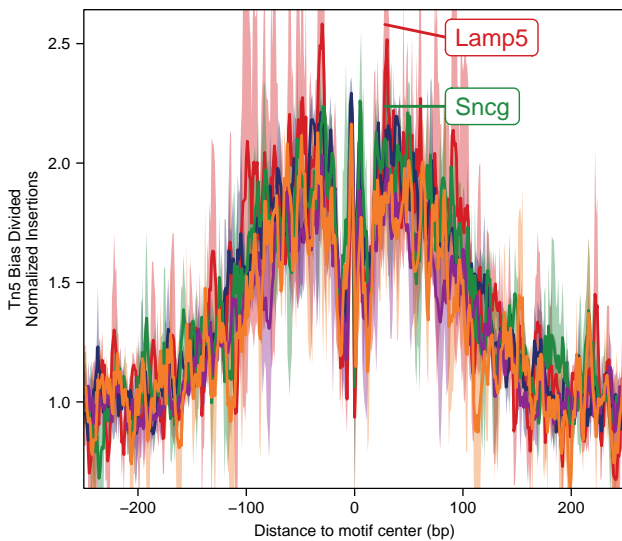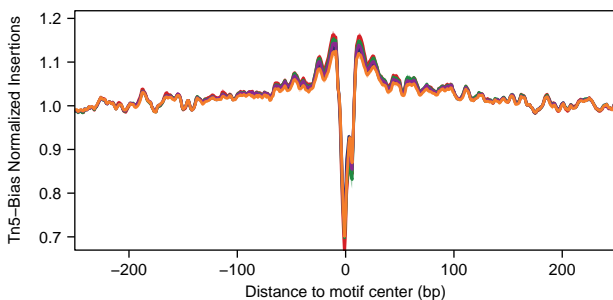

group Lamp5 Pvalb Sncg Sst Vip

Mafb\_66

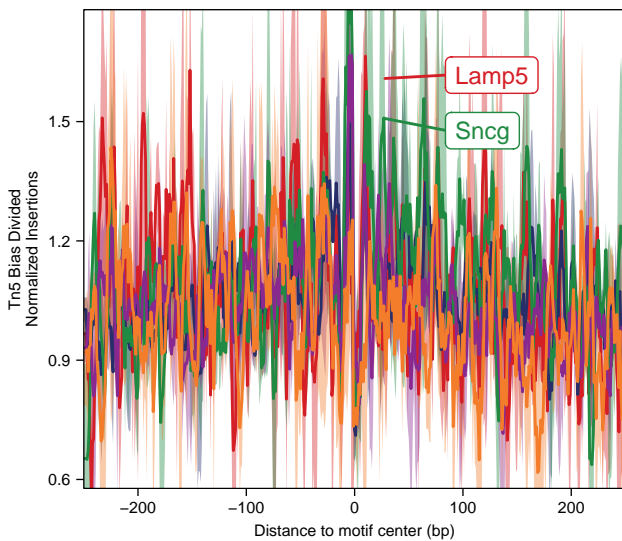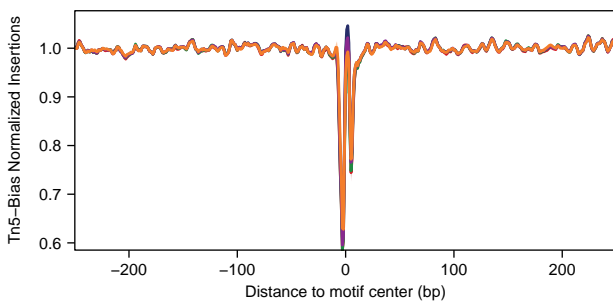

group Lamp5 Pvalb Sncg Sst Vip

Foxj3\_67

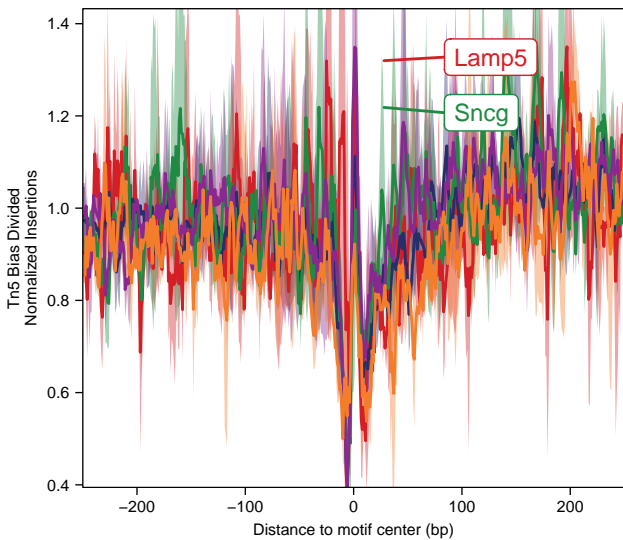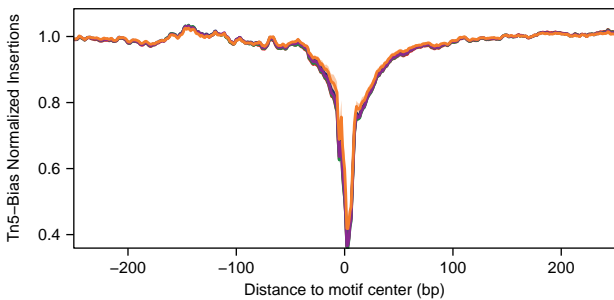

group Lamp5 Pvalb Sncg Sst Vip

Alx4\_68

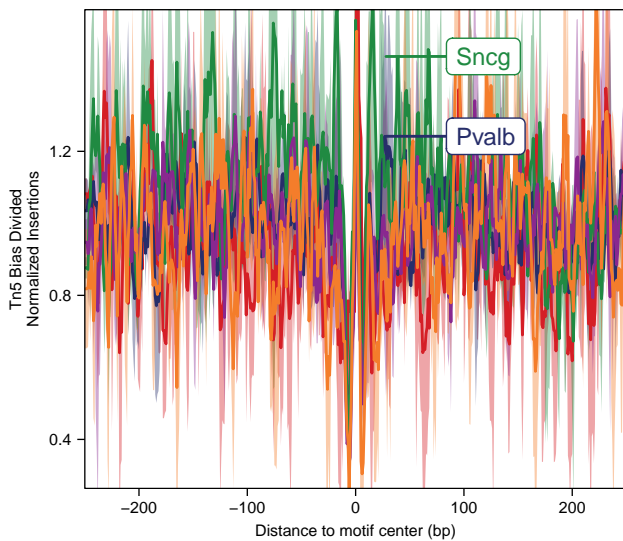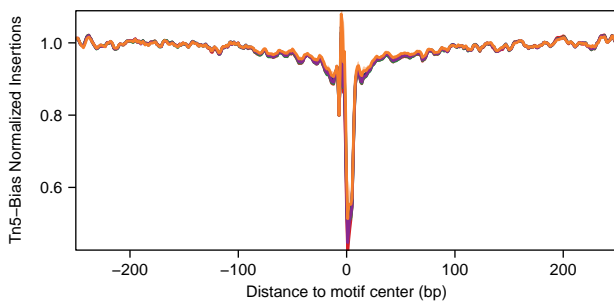

group Lamp5 Pvalb Sncg Sst Vip

Alx1\_69

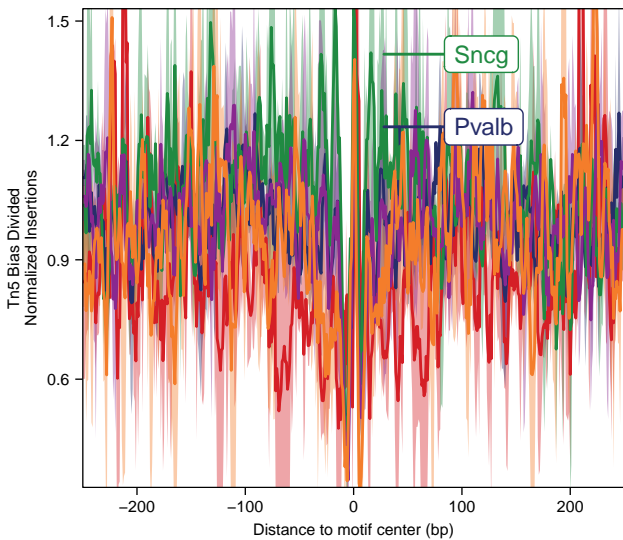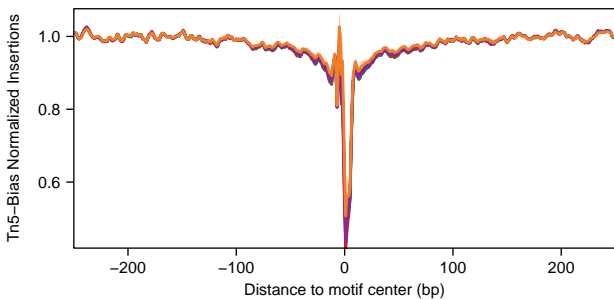

group Lamp5 Pvalb Sncg Sst Vip

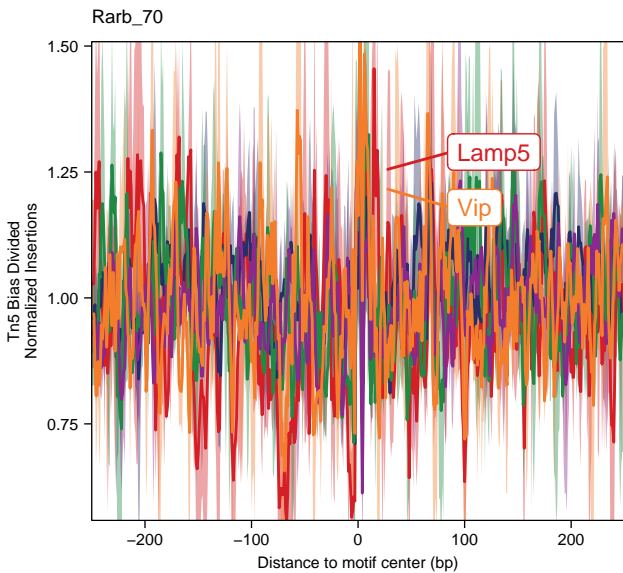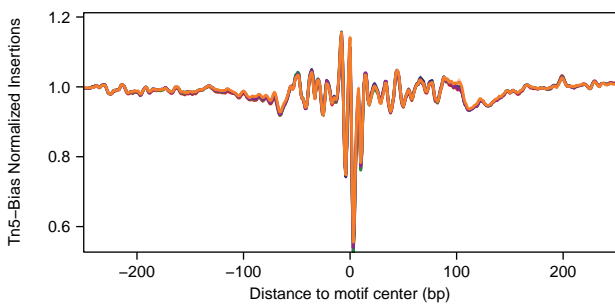

group Lamp5 Pvalb Sncg Sst Vip

Rarb.var.2\_71

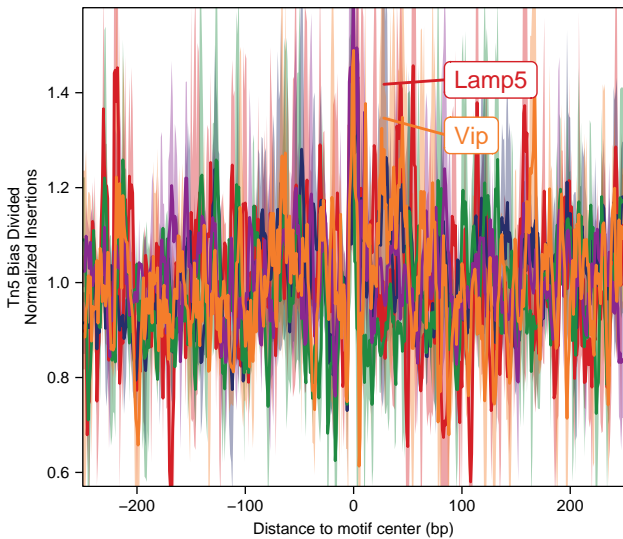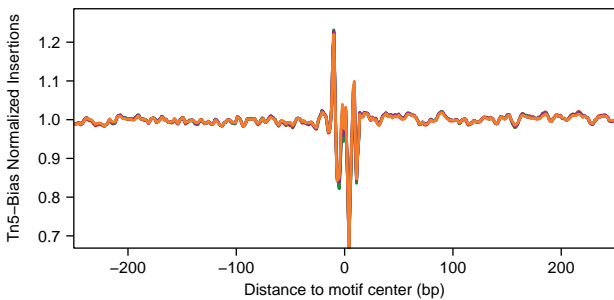

group Lamp5 Pvalb Sncg Sst Vip

Rarg\_72

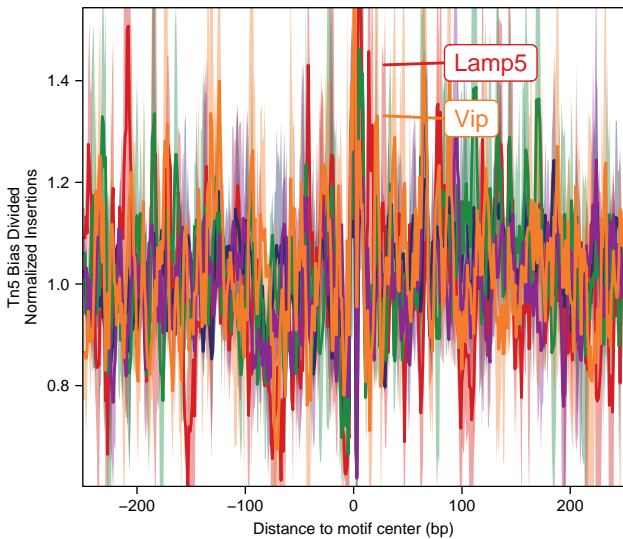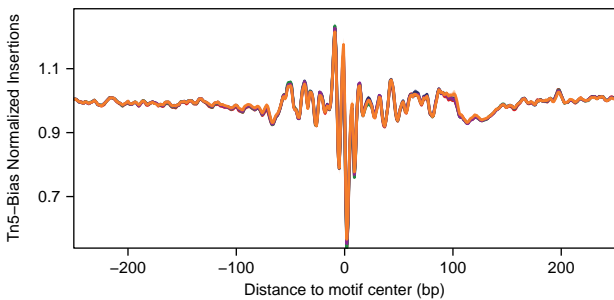

group Lamp5 Pvalb Sncg Sst Vip



Rarg.var.2\_73

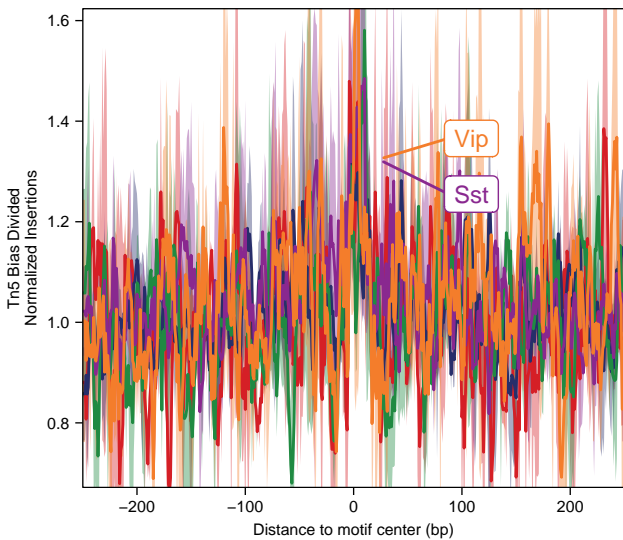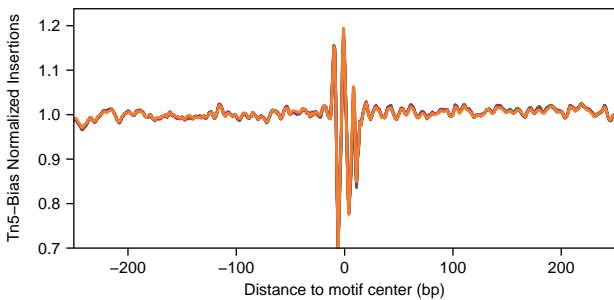

group Lamp5 Pvalb Sncg Sst Vip

Sox11\_74

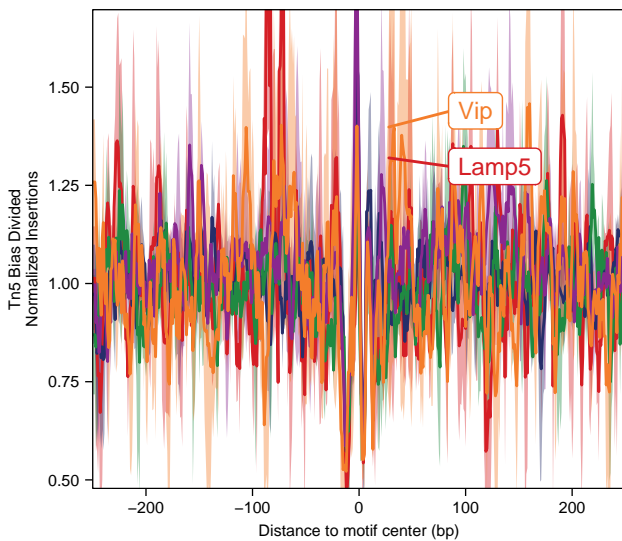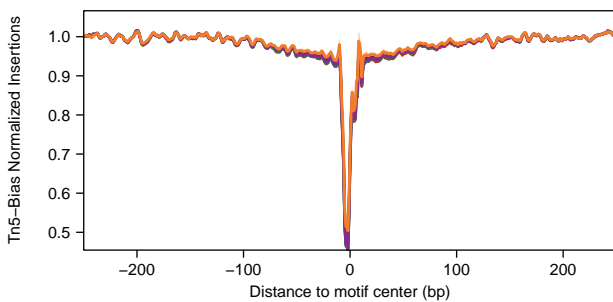

group ■ Lamp5 ■ Pvalb ■ Sncg ■ Sst ■ Vip

Sox1\_75

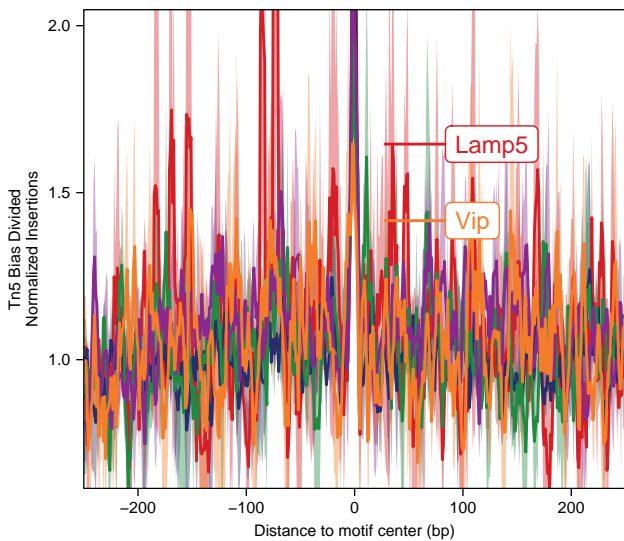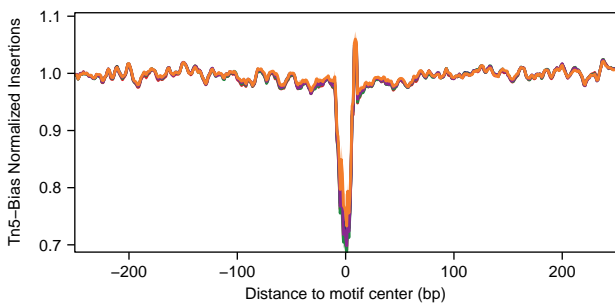

group Lamp5 Pvalb Sncg Sst Vip

Arx\_76

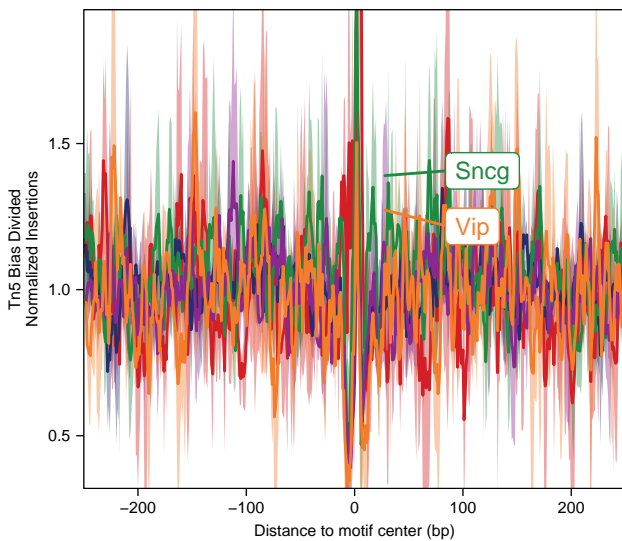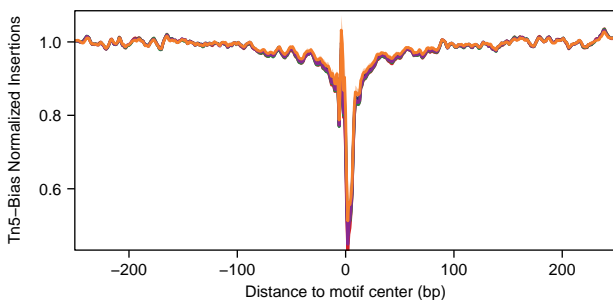

group Lamp5 Pvalb Sncg Sst Vip

Dlx1\_77

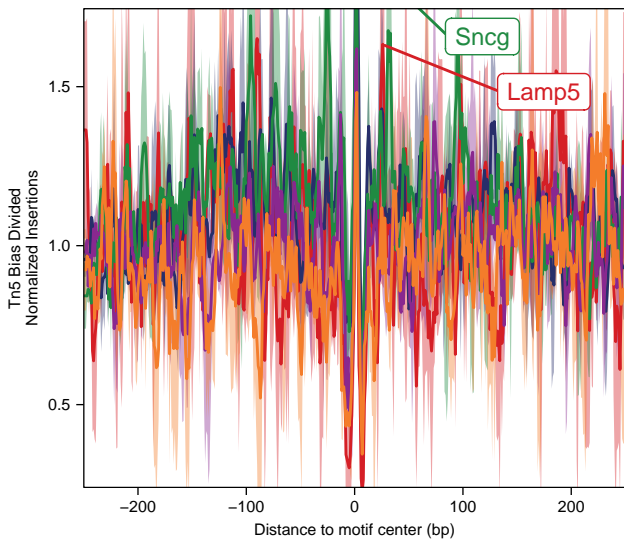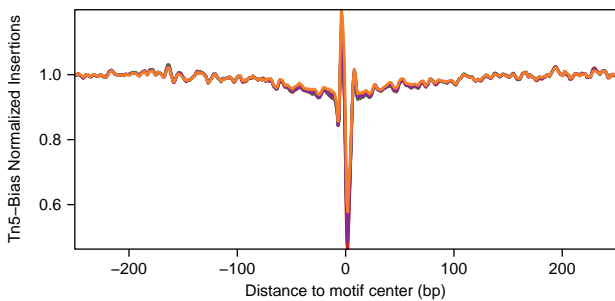

group Lamp5 Pvalb Sncg Sst Vip

Dlx3\_78

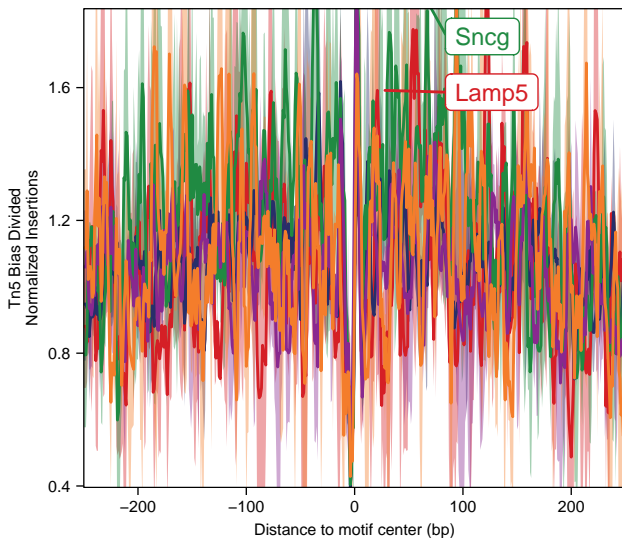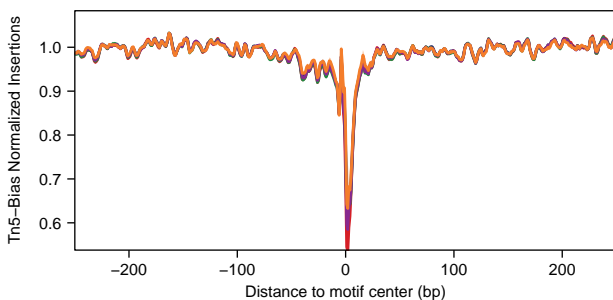

group Lamp5 Pvalb Sncg Sst Vip

Dlx4\_79

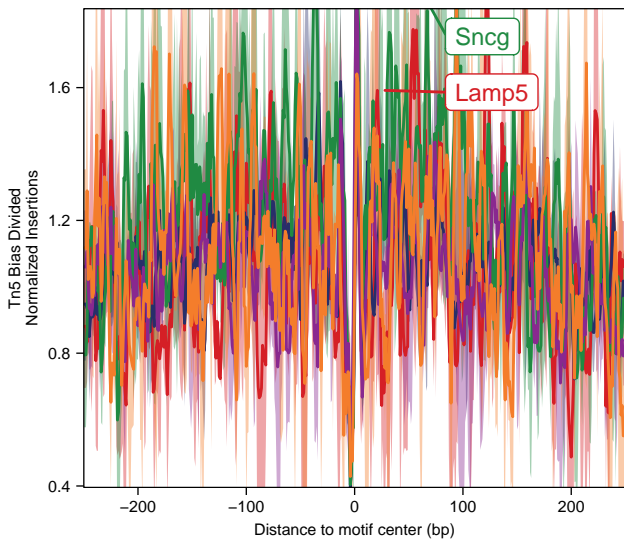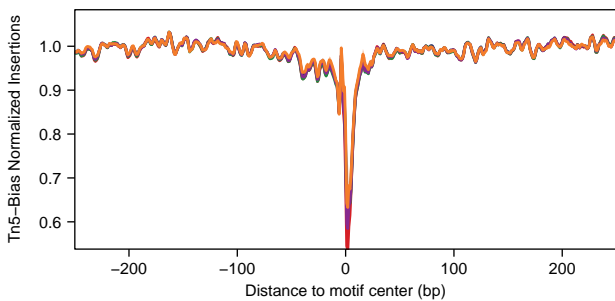

group Lamp5 Pvalb Sncg Sst Vip

Dmbx1\_80

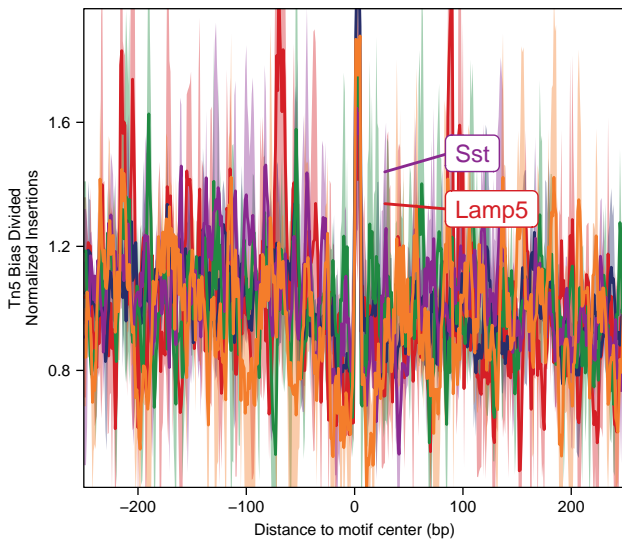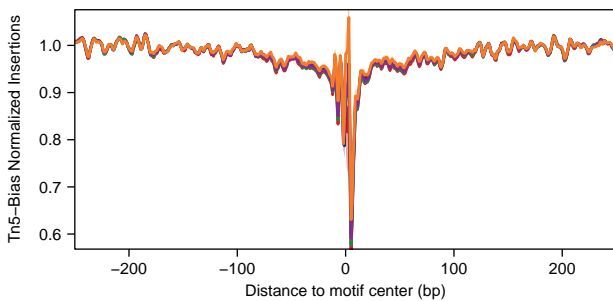

group Lamp5 Pvalb Sncg Sst Vip



Dlx2\_81

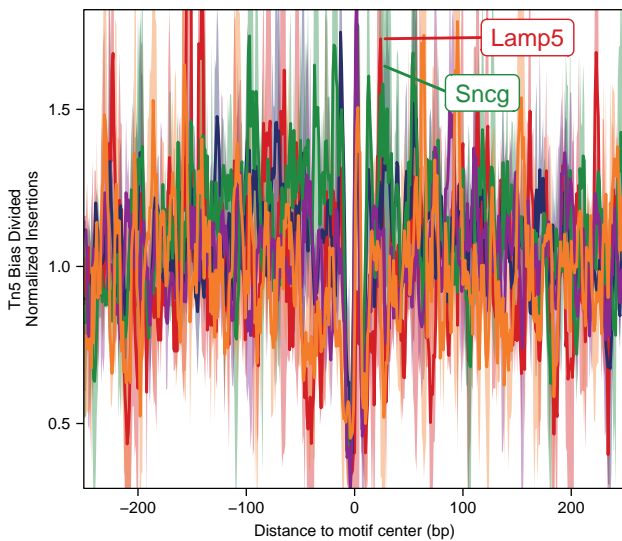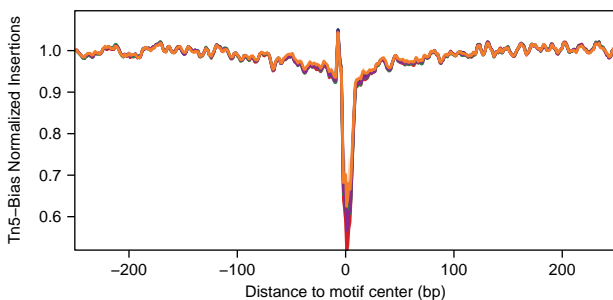

group Lamp5 Pvalb Sncg Sst Vip

Hmx1\_82

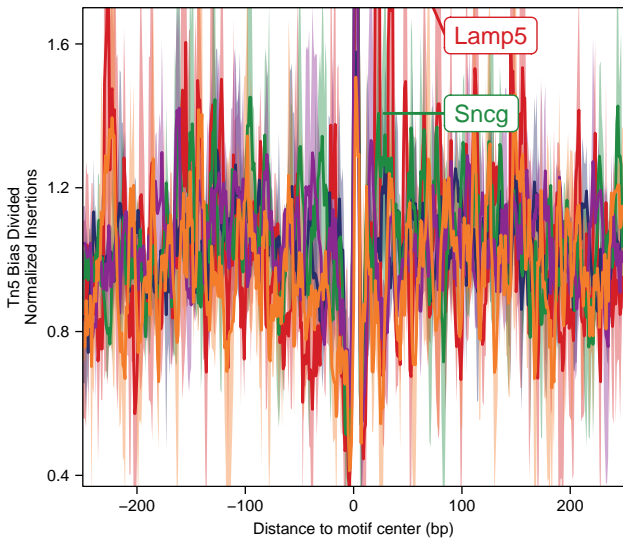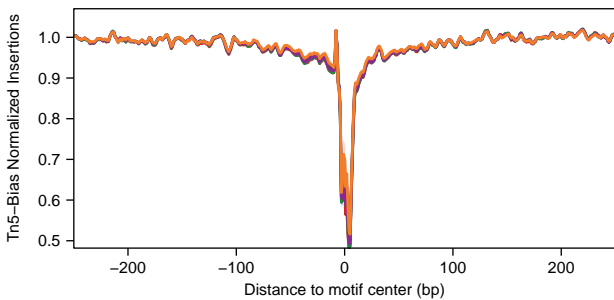

group Lamp5 Pvalb Sncg Sst Vip

Hmx2\_83

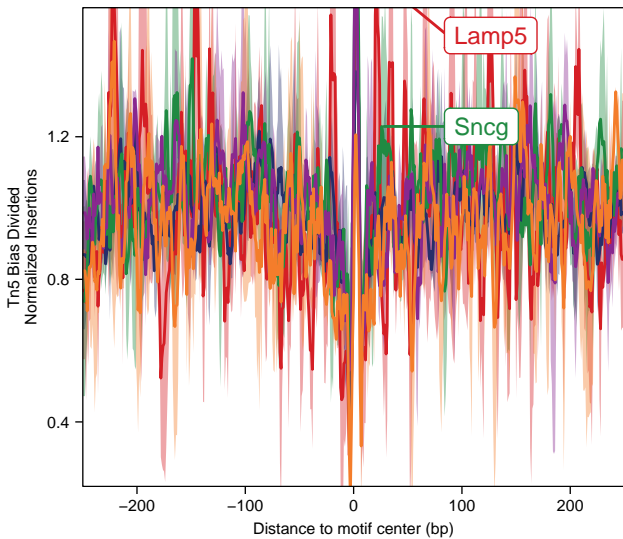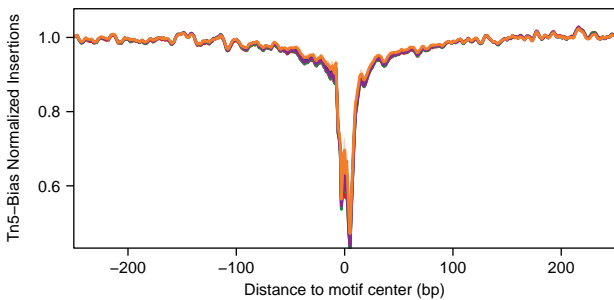

group Lamp5 Pvalb Sncg Sst Vip

Hmx3\_84

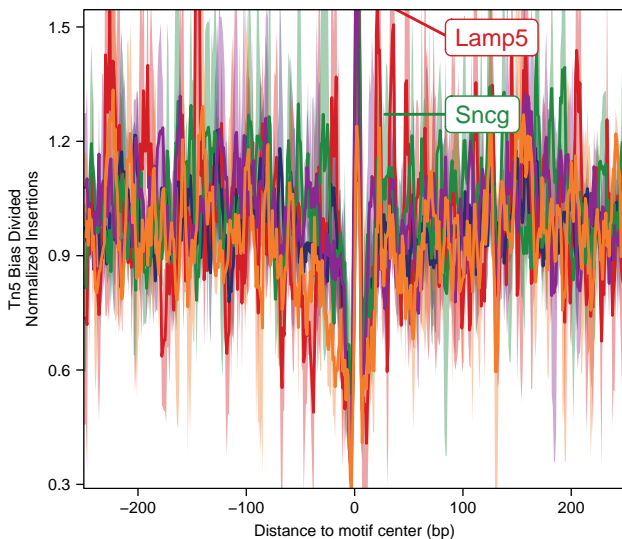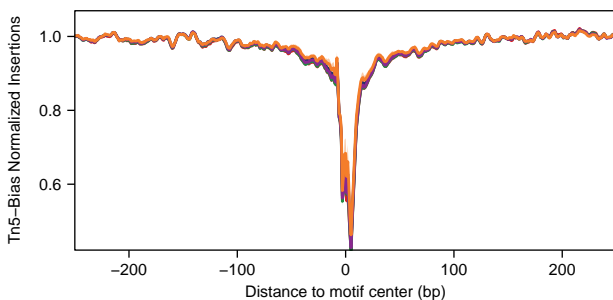

group Lamp5 Pvalb Sncg Sst Vip

Hoxa11\_85

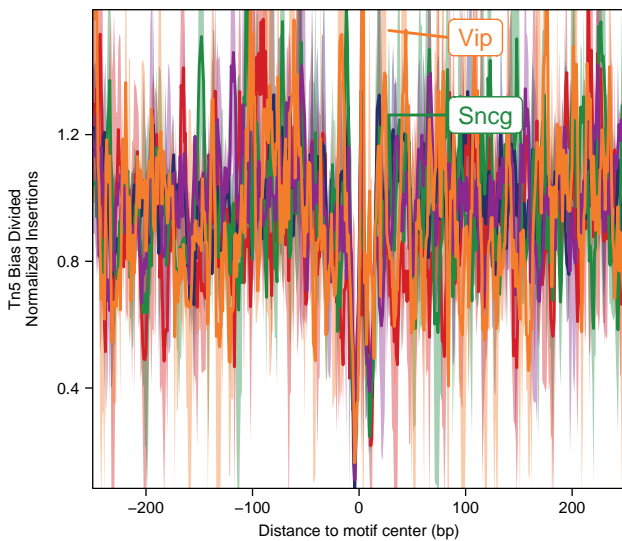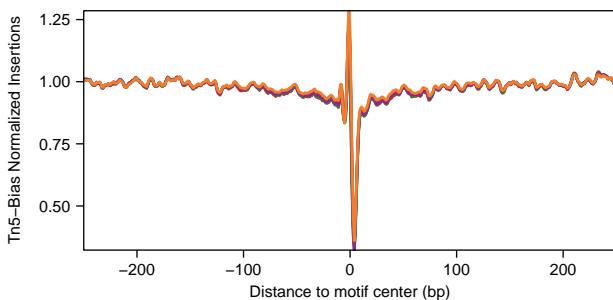

group Lamp5 Pvalb Sncg Sst Vip

Smad4\_86

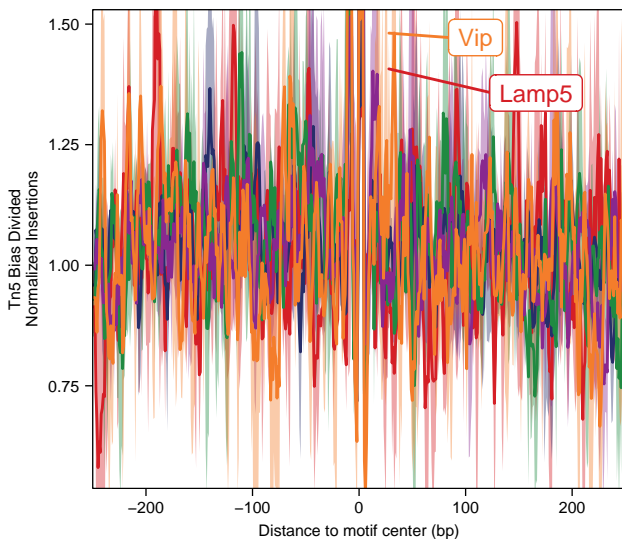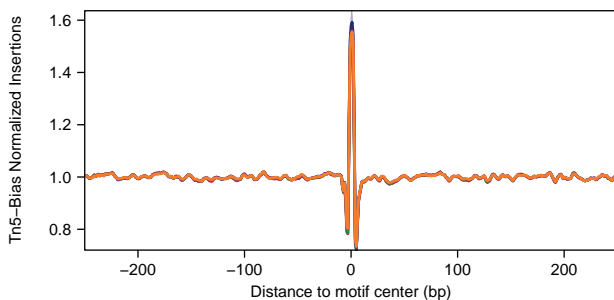

group ■ Lamp5 ■ Pvalb ■ Sneg ■ Sst ■ Vip

Dmrt1\_87

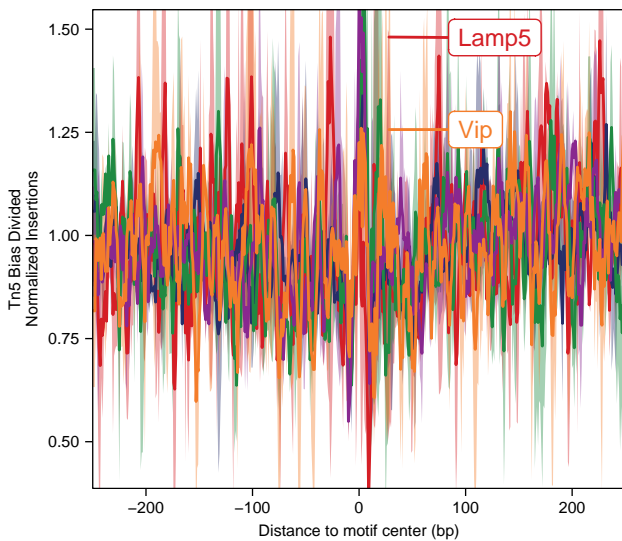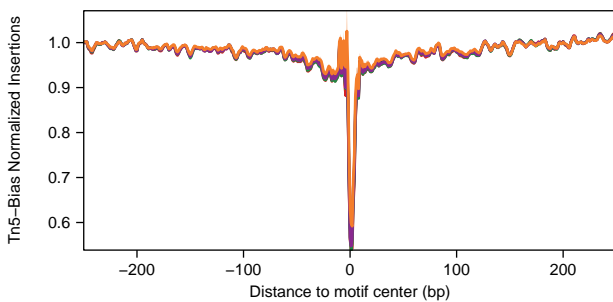

group ■ Lamp5 ■ Pvalb ■ SnCG ■ Sst ■ Vip

Ebf2\_88

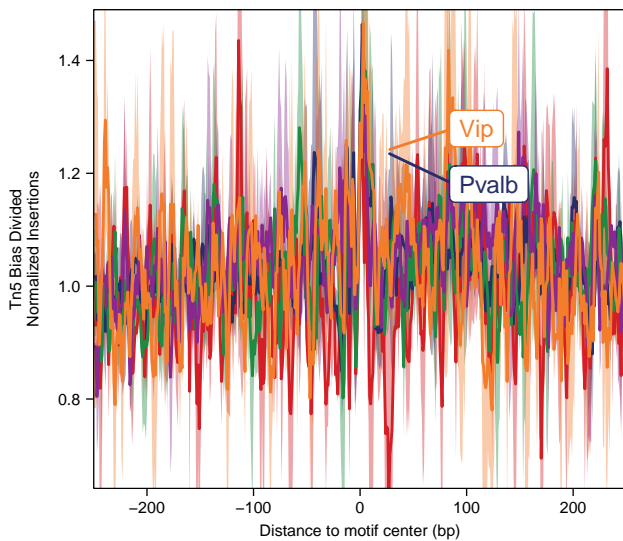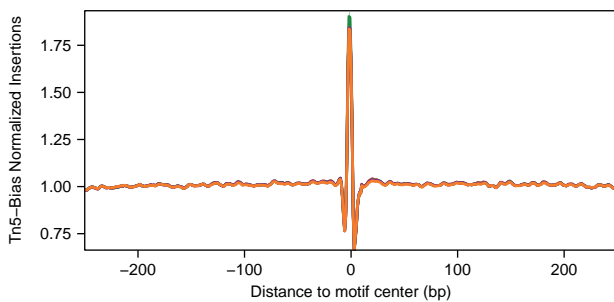

group ■ Lamp5 ■ Pvalb ■ Sncg ■ Sst ■ Vip



Foxf1\_89

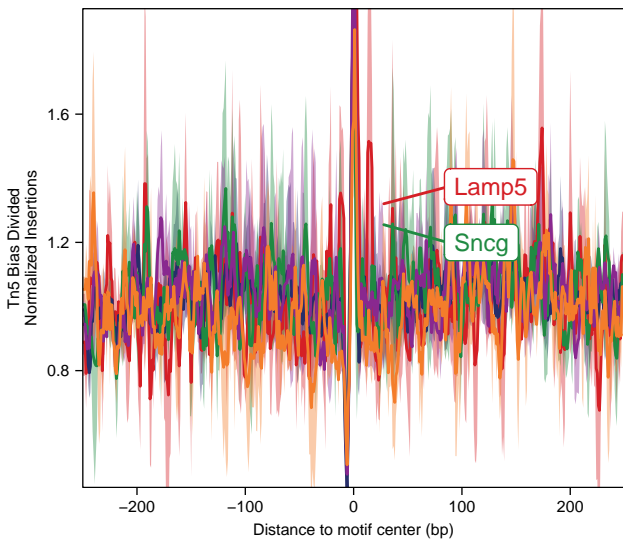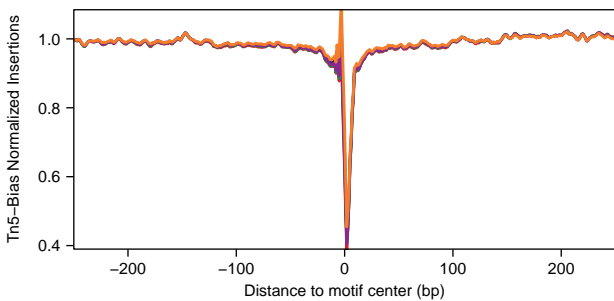

group Lamp5 Pvalb Sncg Sst Vip

Foxl2\_90

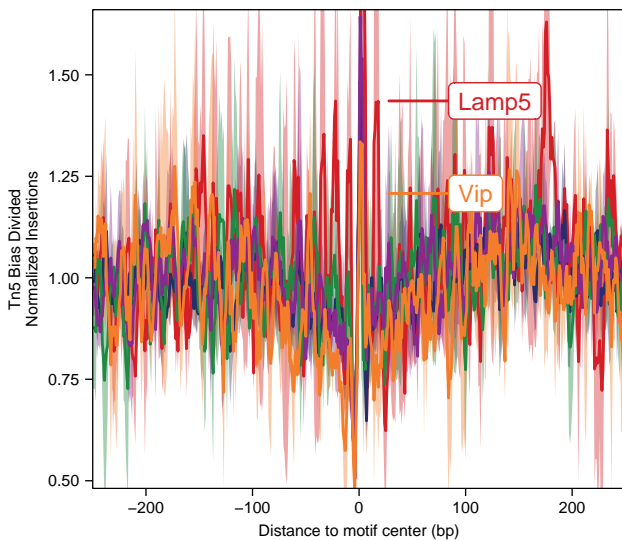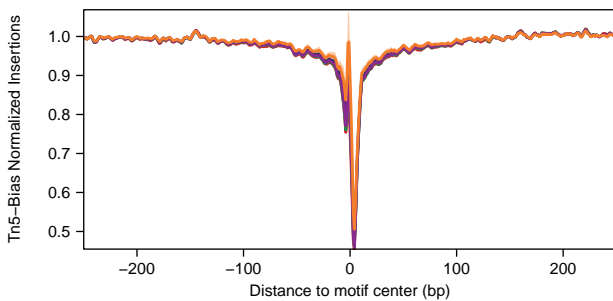

group ■ Lamp5 ■ Pvalb ■ Sneg ■ Sst ■ Vip

Isl1\_91

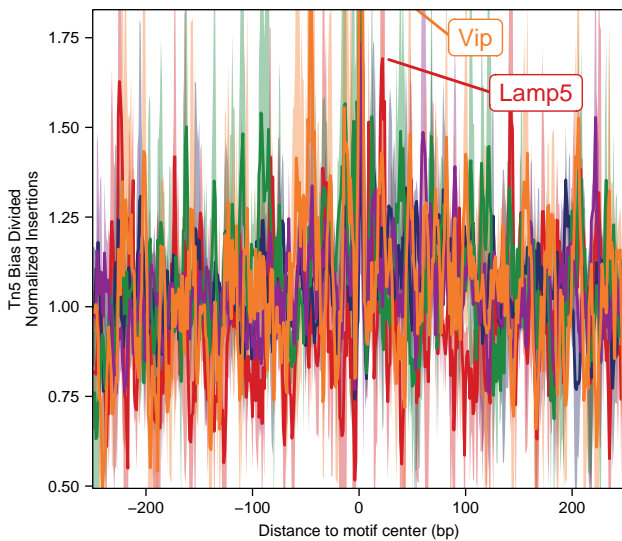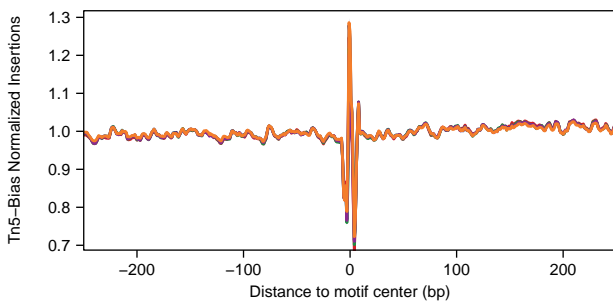

group ■ Lamp5 ■ Pvalb ■ Sncg ■ Sst ■ Vip

Plagl1\_92

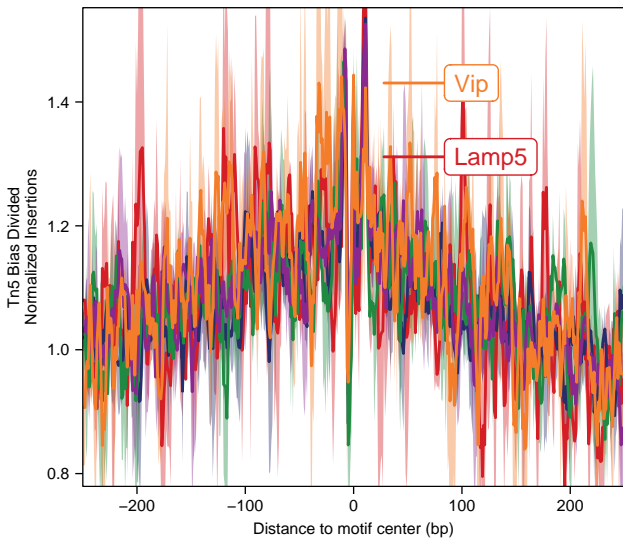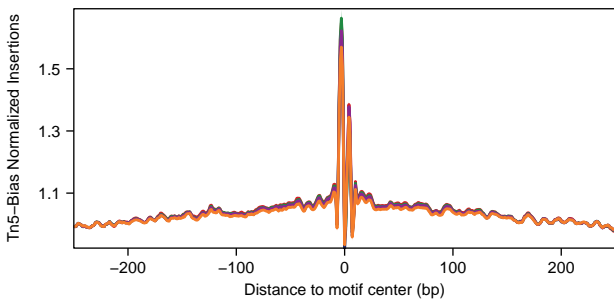

group Lamp5 Pvalb Sncg Sst Vip

Prdm15\_93

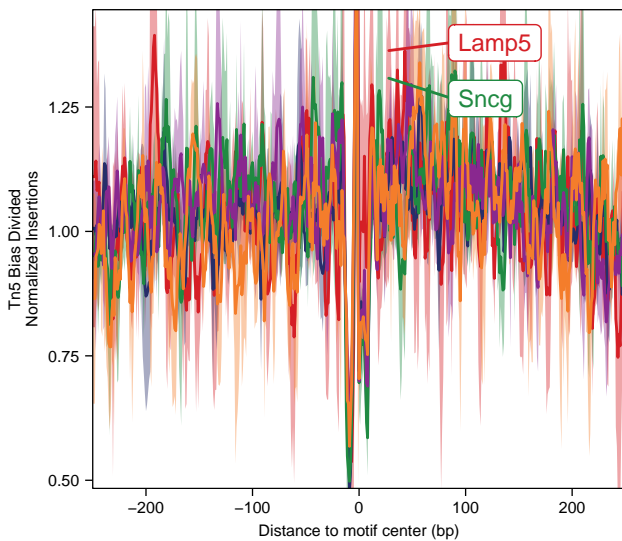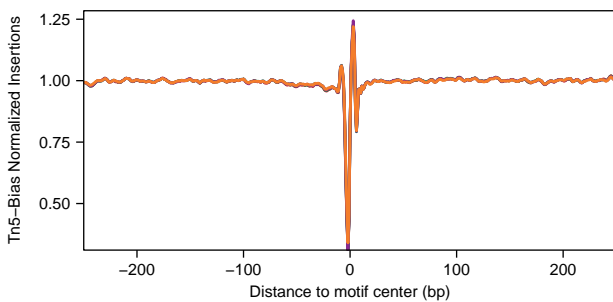

group Lamp5 Pvalb Sncg Sst Vip

Ptf1a\_94

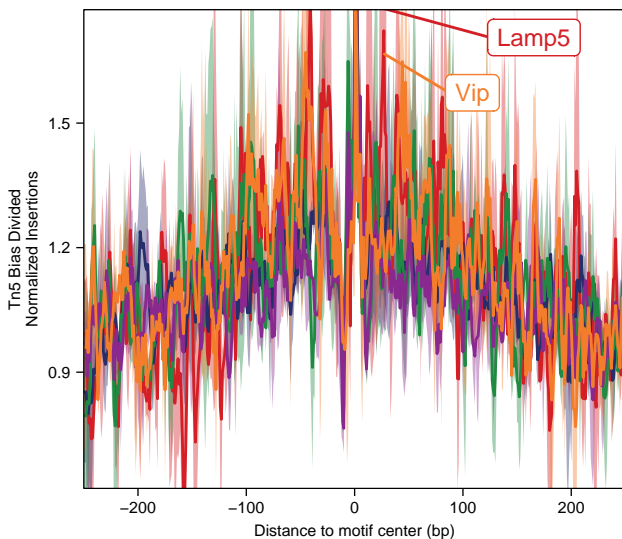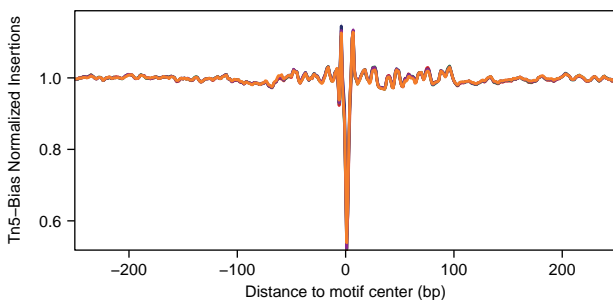

group Lamp5 Pvalb Sncg Sst Vip

Ptf1a.var.2\_95

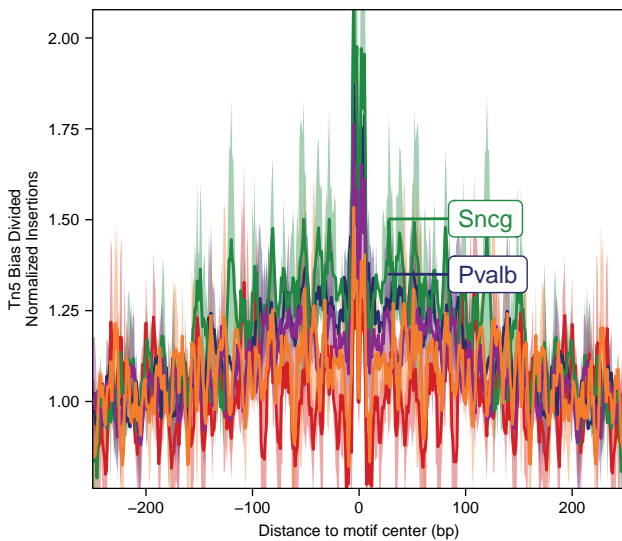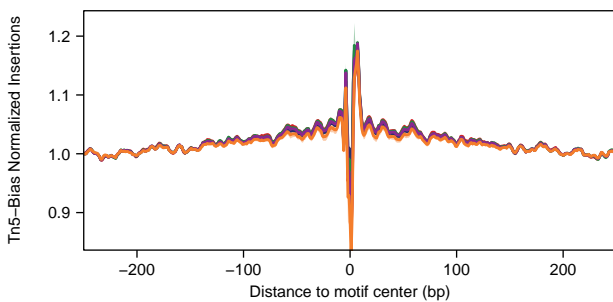

group ■ Lamp5 ■ Pvalb ■ Sncg ■ Sst ■ Vip

Ptf1a.var.3\_96

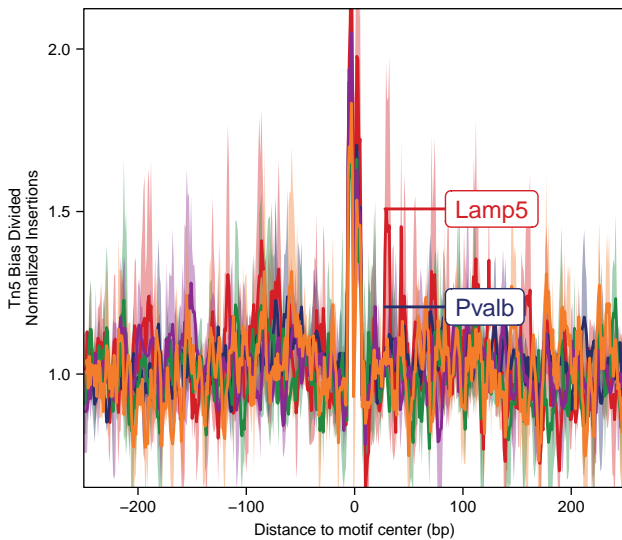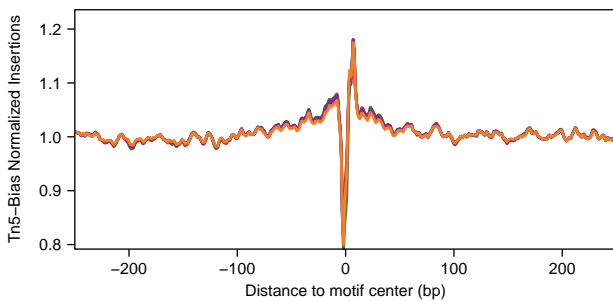

group Lamp5 Pvalb Sncg Sst Vip



Rbpjl\_97

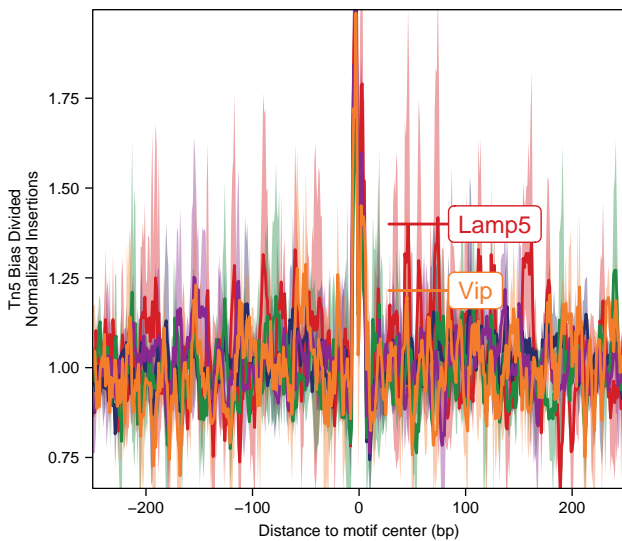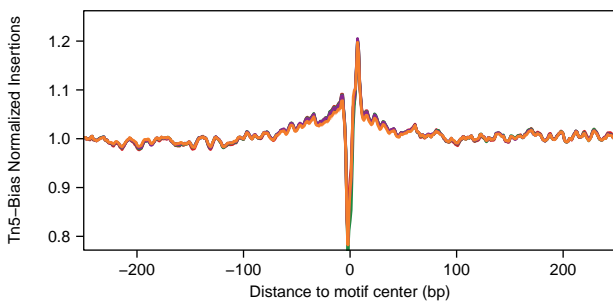

group ■ Lamp5 ■ Pvalb ■ Sncg ■ Sst ■ Vip

Smad2..Smad3\_98

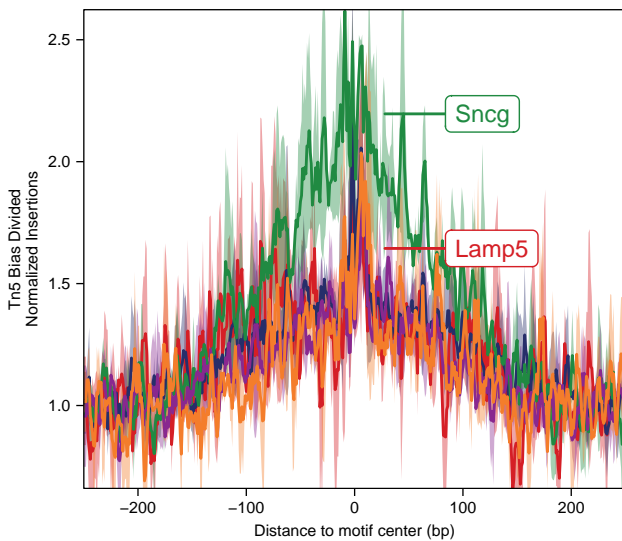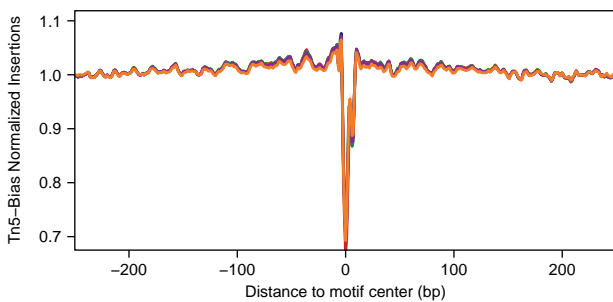

group Lamp5 Pvalb Sncg Sst Vip

Stat2\_99

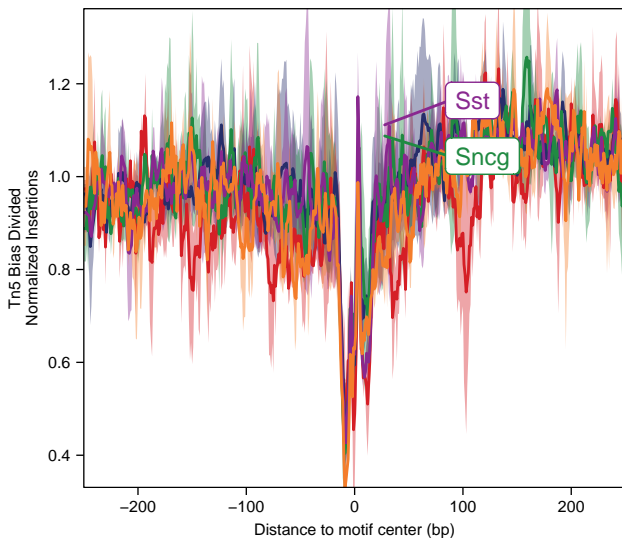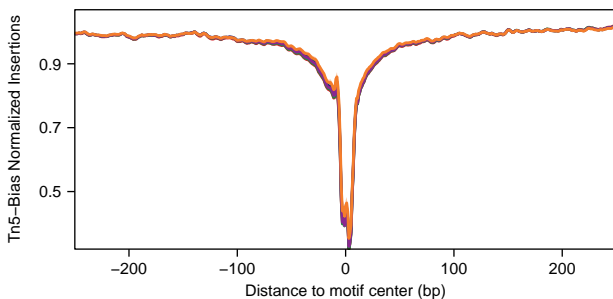

group Lamp5 Pvalb Sncg Sst Vip

Stat5a\_100

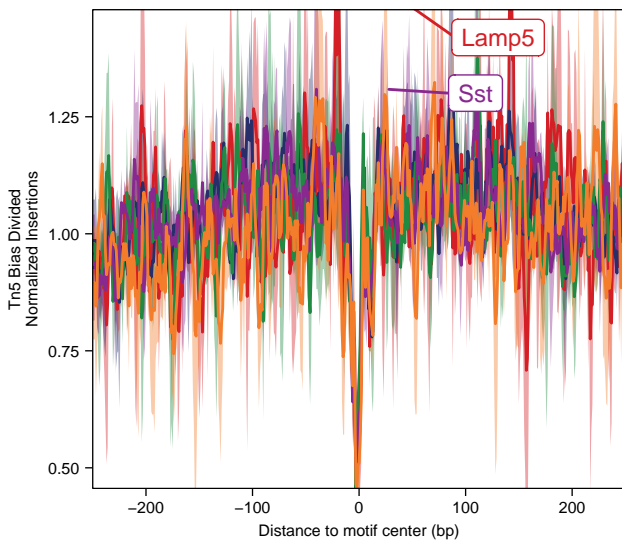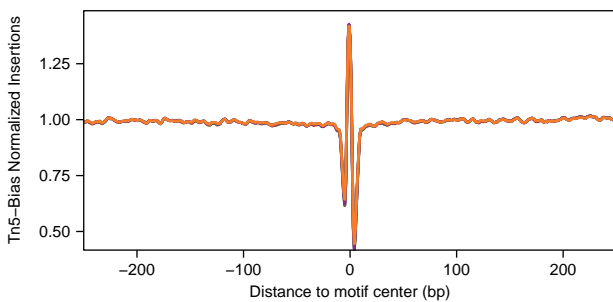

group ■ Lamp5 ■ Pvalb ■ Sncg ■ Sst ■ Vip

Stat5b\_101

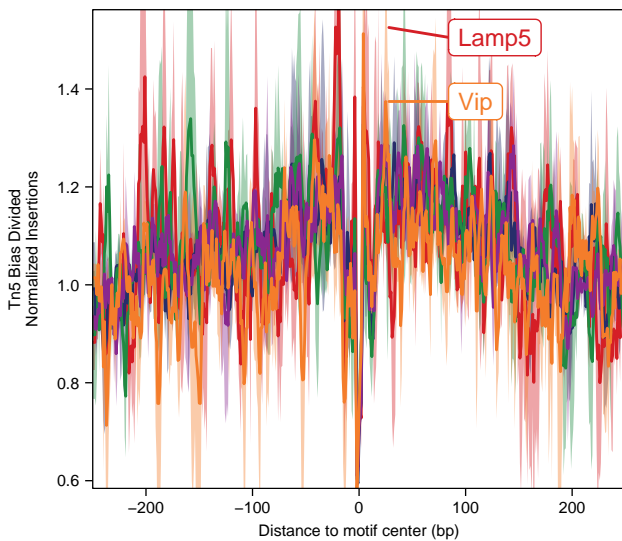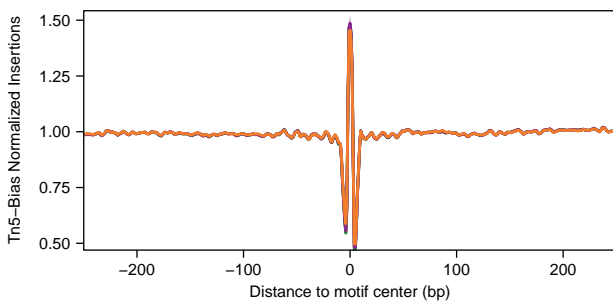

group Lamp5 Pvalb Sncg Sst Vip

Wt1\_102

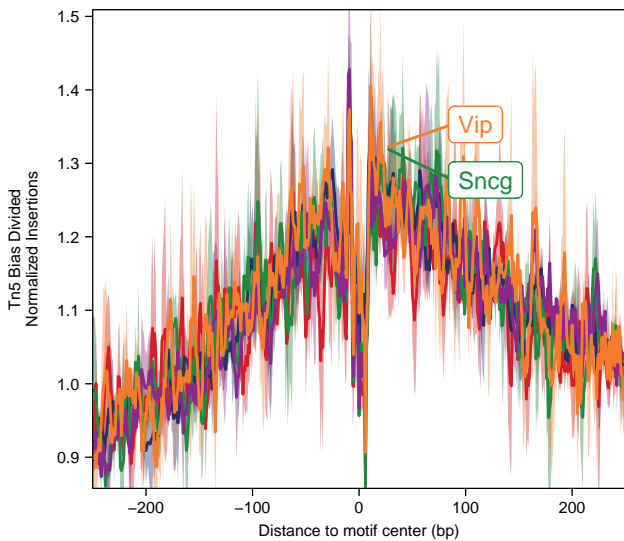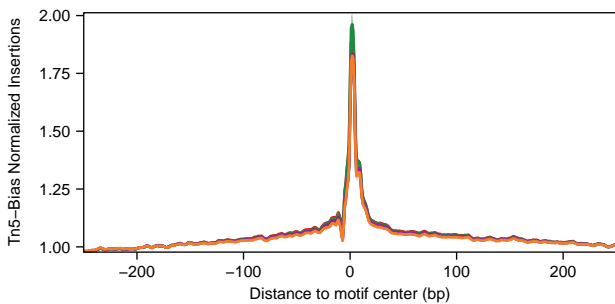

group ■ Lamp5 ■ Pvalb ■ Sncg ■ Sst ■ Vip

Zic1..Zic2\_103

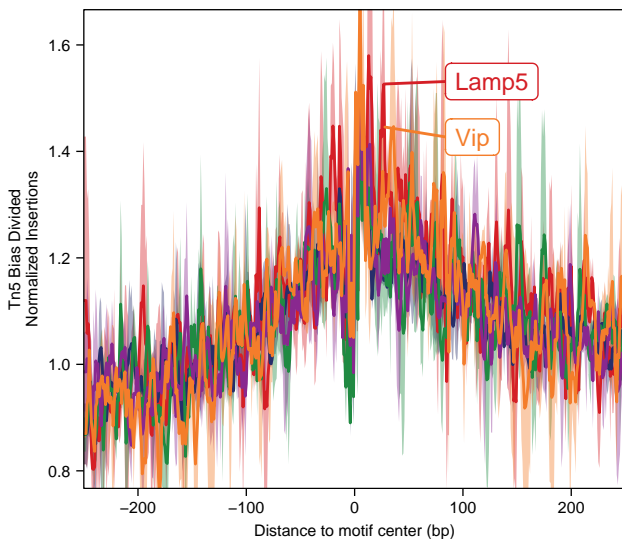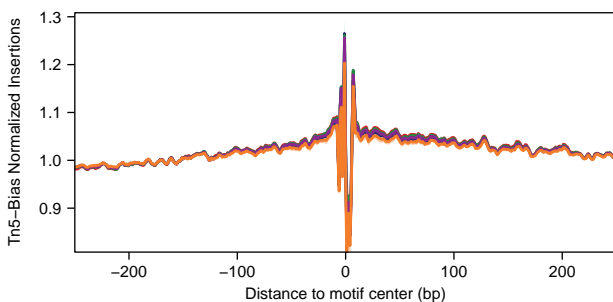

group Lamp5 Pvalb Sncg Sst Vip

Zic2\_104

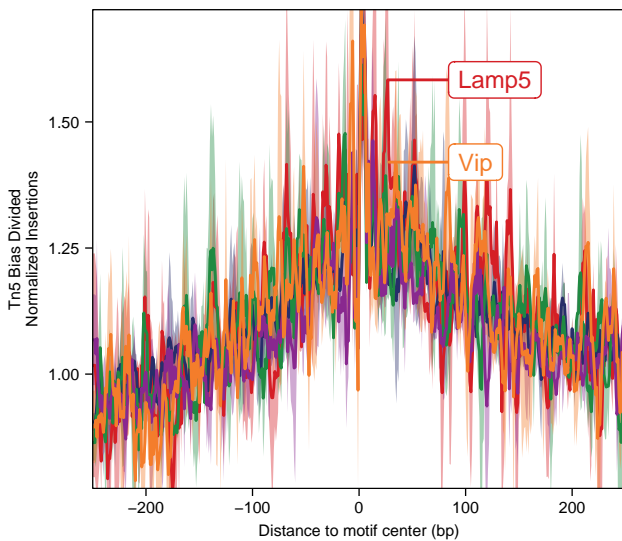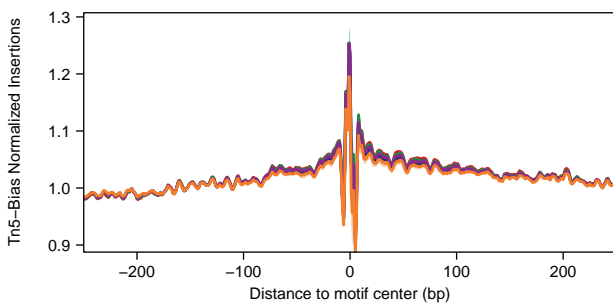

group ■ Lamp5 ■ Pvalb ■ SnCG ■ Sst ■ Vip



Znf281\_105

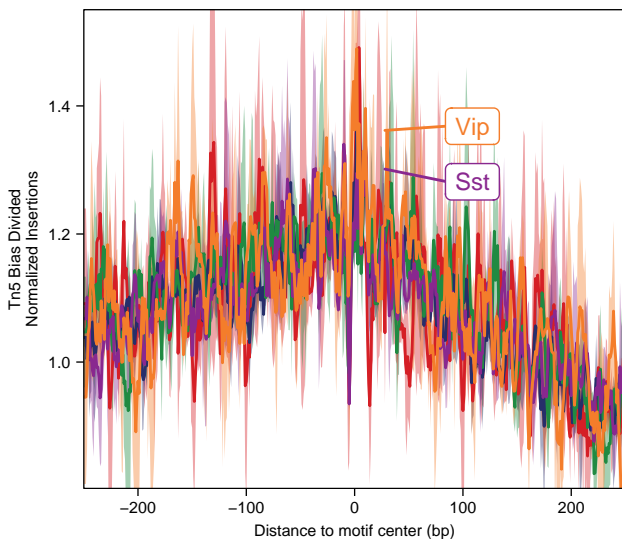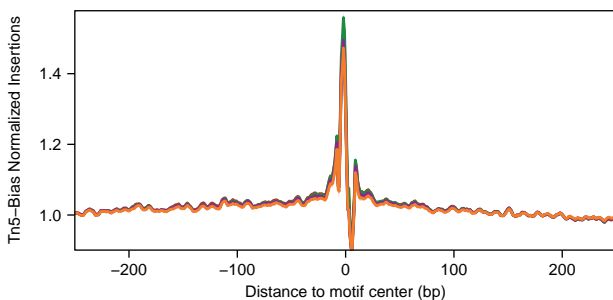

group Lamp5 Pvalb Sncg Sst Vip

Nkx3.2\_106

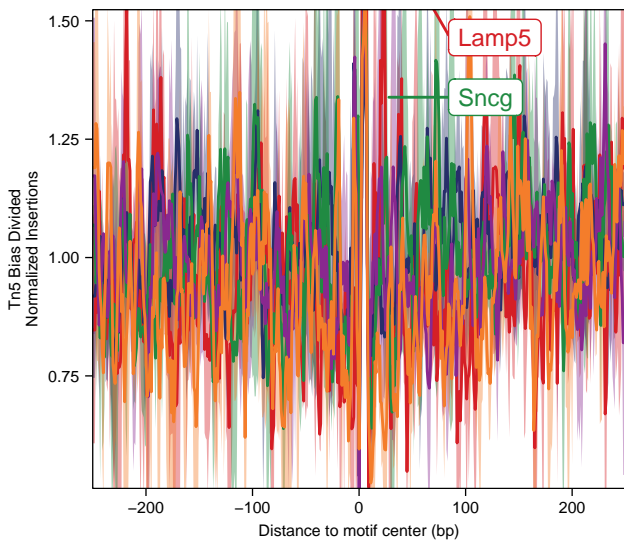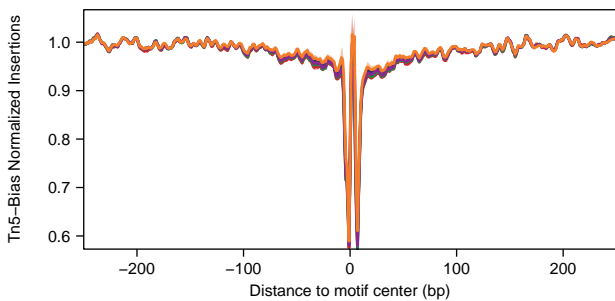

group Lamp5 Pvalb Sncg Sst Vip

Foxn1\_107

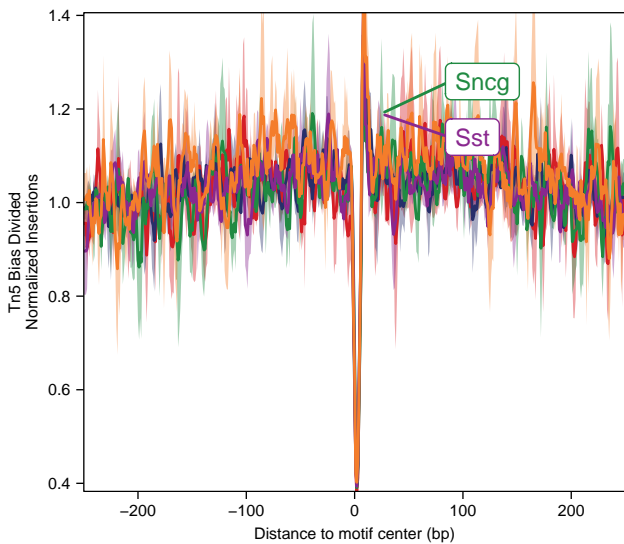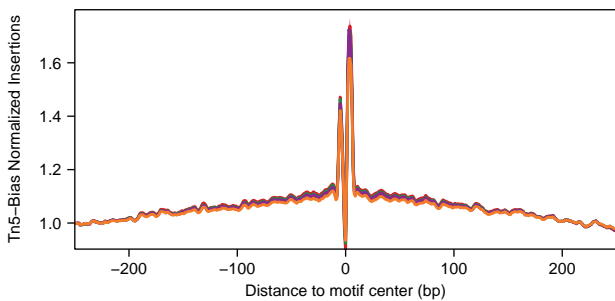

group Lamp5 Pvalb Sncg Sst Vip
