# Supplementary material for: Atlas-scale single-cell chromatin accessibility using nanowell-based combinatorial indexing
Source: HighWire-hosted journal article supplement (doi:10.1101/gr.276655.122), 2023-02-01
Supplement: Supplemental_File_S2.zip [file GABAergic TF Footprinting - sciATACv3.pdf › GABAergic TF Footprinting - sciATACv3.pdf]

Arnt\_1

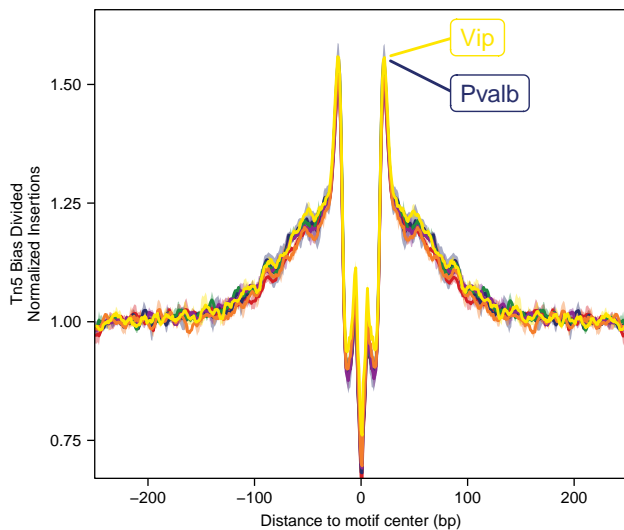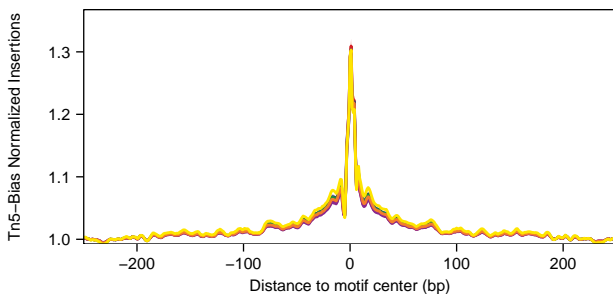

group

|       |      |           |
|-------|------|-----------|
| Lamp5 | Sncg | Sst Chodl |
| Pvalb | Sst  | Vip       |

Ahr..Arnt\_2

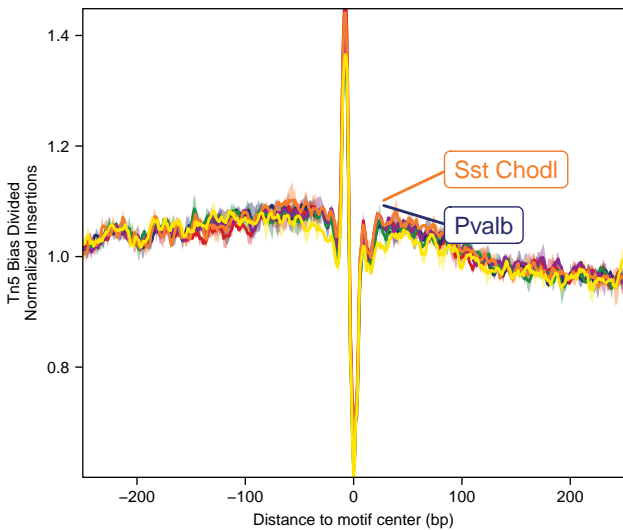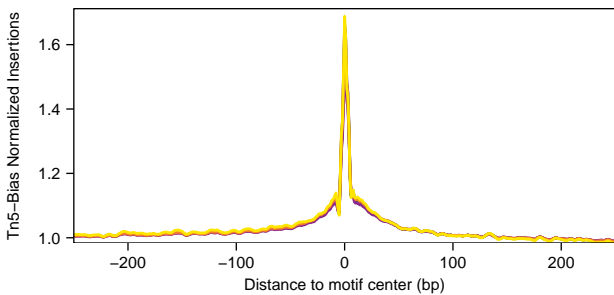

group

|       |      |           |
|-------|------|-----------|
| Lamp5 | Sneg | Sst ChodI |
| Pvalb | Sst  | Vip       |

Mecom\_3

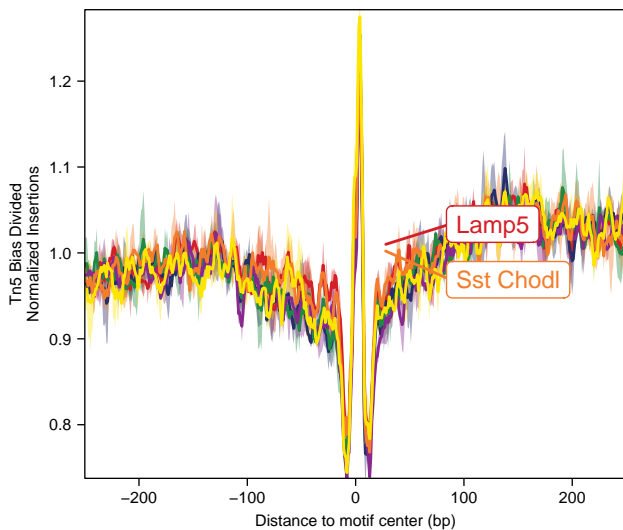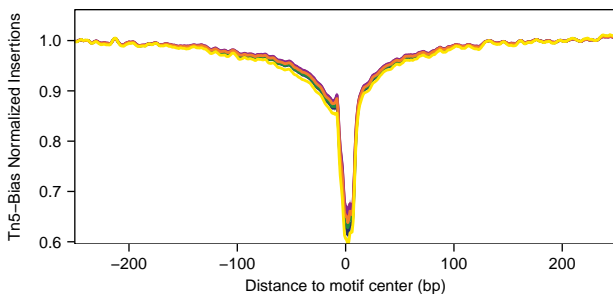

group

|       |      |           |
|-------|------|-----------|
| Lamp5 | Sncg | Sst Chodl |
| Pvalb | Sst  | Vip       |

Pax2\_4

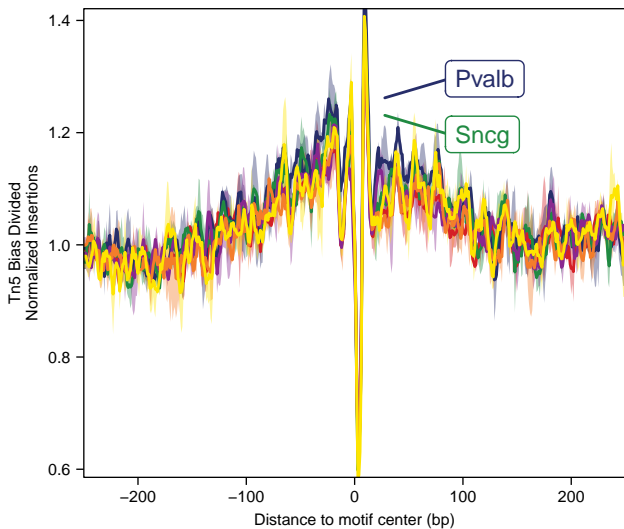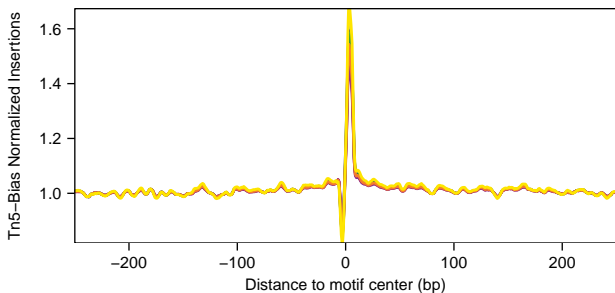

group

|       |      |           |
|-------|------|-----------|
| Lamp5 | Sncg | Sst Chodl |
| Pvalb | Sst  | Vip       |



Sox17\_5

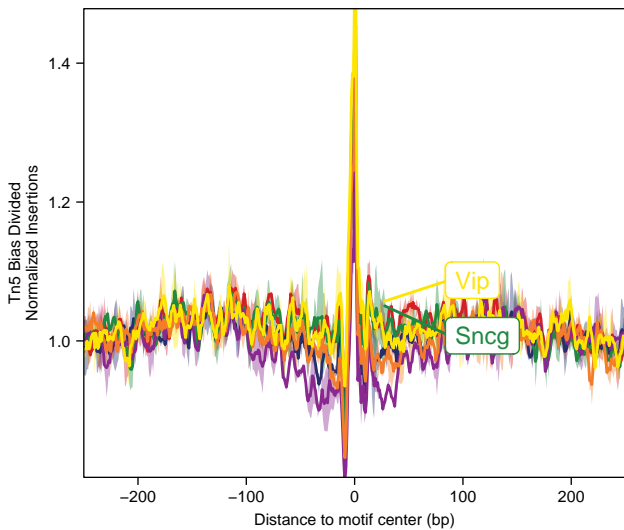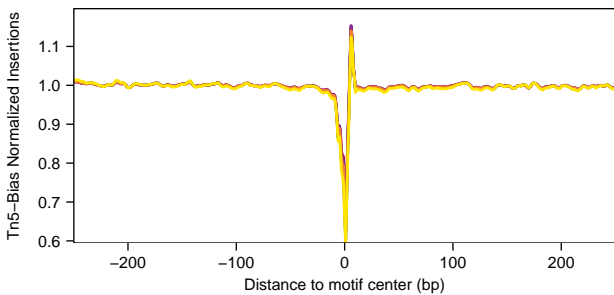

group

|       |      |           |
|-------|------|-----------|
| Lamp5 | Sncg | Sst Chodl |
| Pvalb | Sst  | Vip       |

Sox5\_6

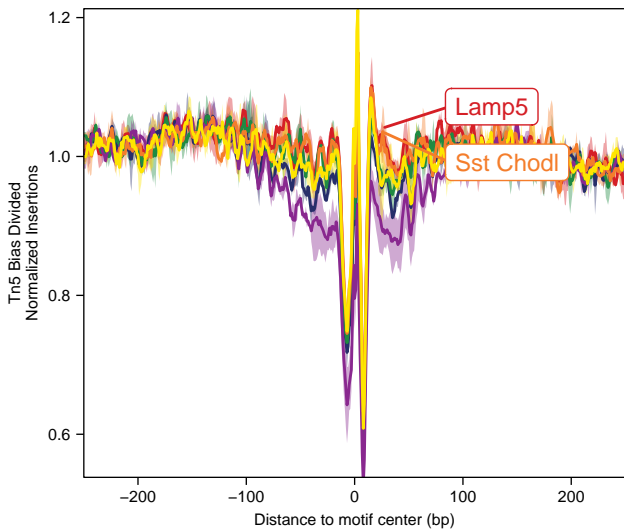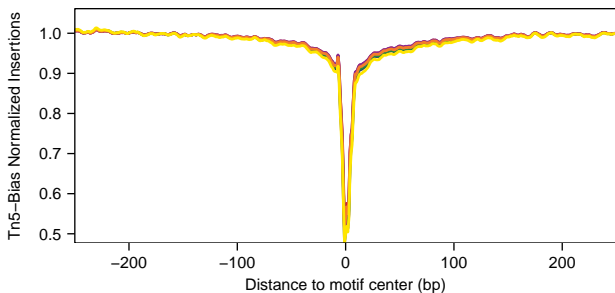

group

|       |      |           |
|-------|------|-----------|
| Lamp5 | SnCG | Sst Chodl |
| Pvalb | Sst  | Vip       |

Hand1..Tcf3\_7

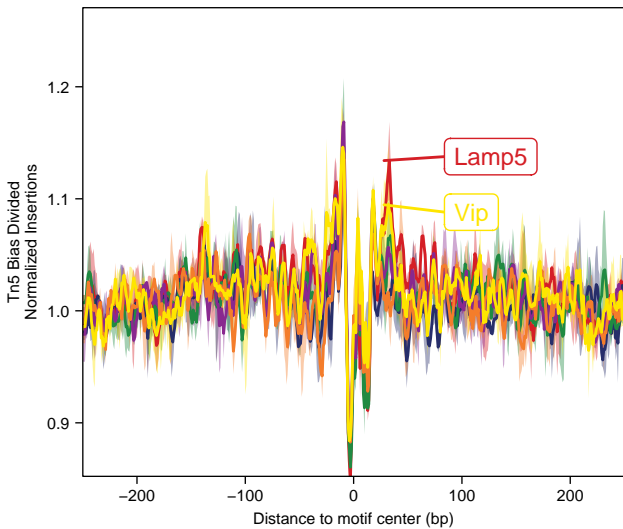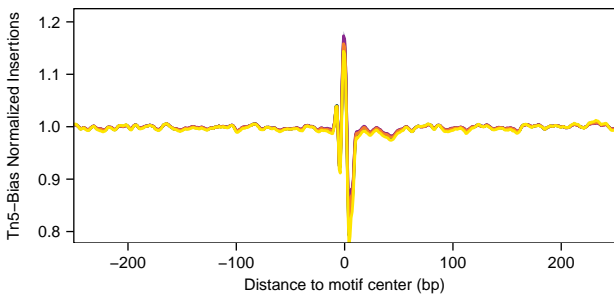

group

|       |      |           |
|-------|------|-----------|
| Lamp5 | Sncg | Sst Chodl |
| Pvalb | Sst  | Vip       |

Spz1\_8

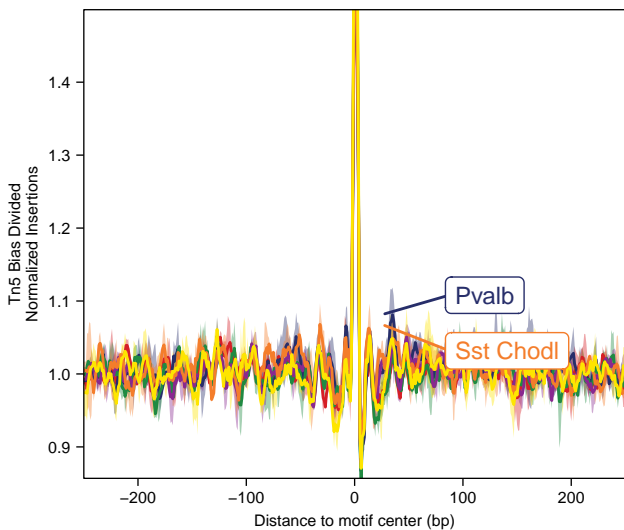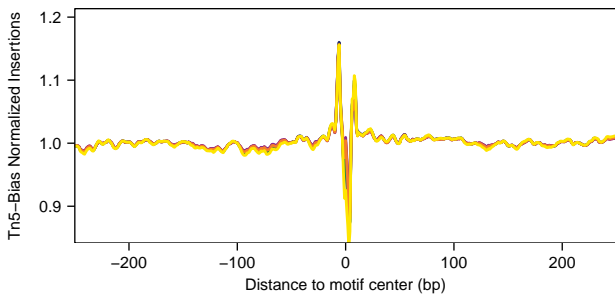

group

|       |      |           |
|-------|------|-----------|
| Lamp5 | Snog | Sst Chodl |
| Pvalb | Sst  | Vip       |

Nobox\_9

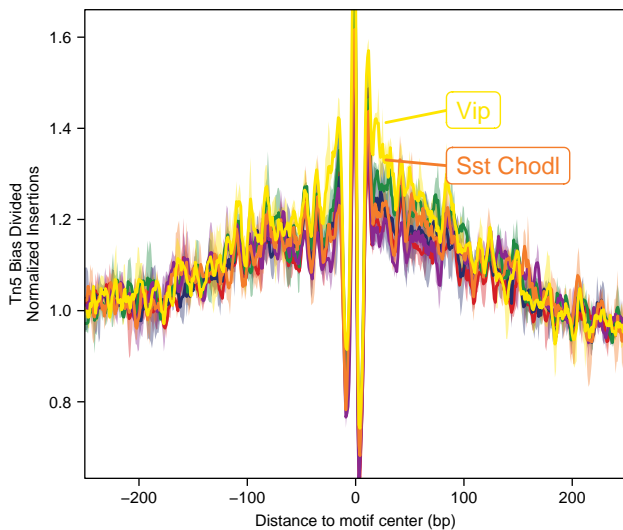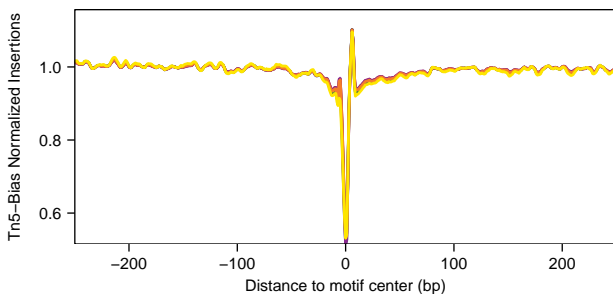

group

|       |      |           |
|-------|------|-----------|
| Lamp5 | Sneg | Sst Chodl |
| Pvalb | Sst  | Vip       |

Lhx3\_10

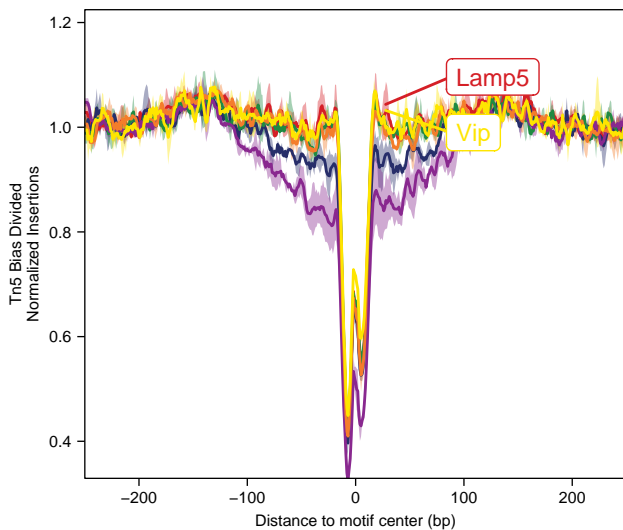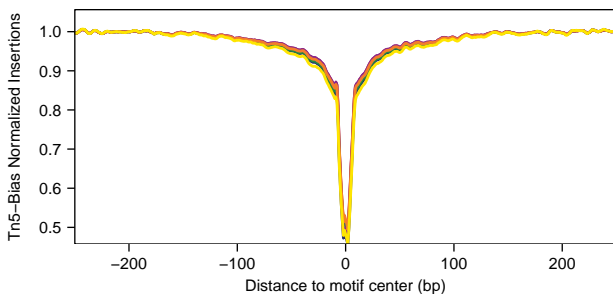

group

|       |      |           |
|-------|------|-----------|
| Lamp5 | Sneg | Sst Chodl |
| Pvalb | Sst  | Vip       |

Pou5f1..Sox2\_11

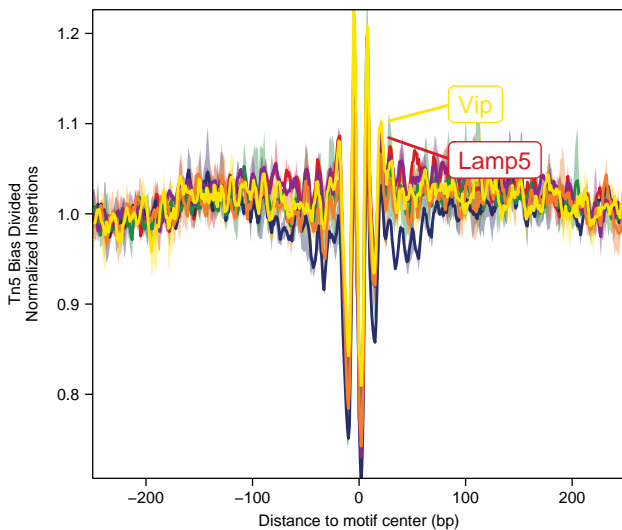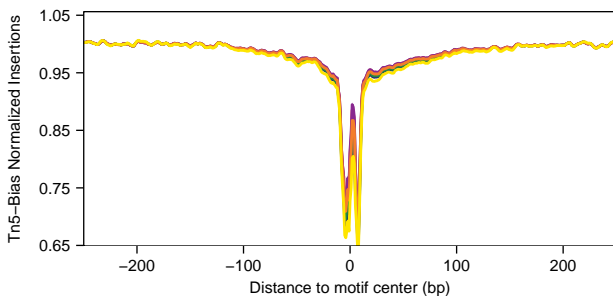

group

|       |      |           |
|-------|------|-----------|
| Lamp5 | Sncg | Sst Chodl |
| Pvalb | Sst  | Vip       |

RUNX1\_12

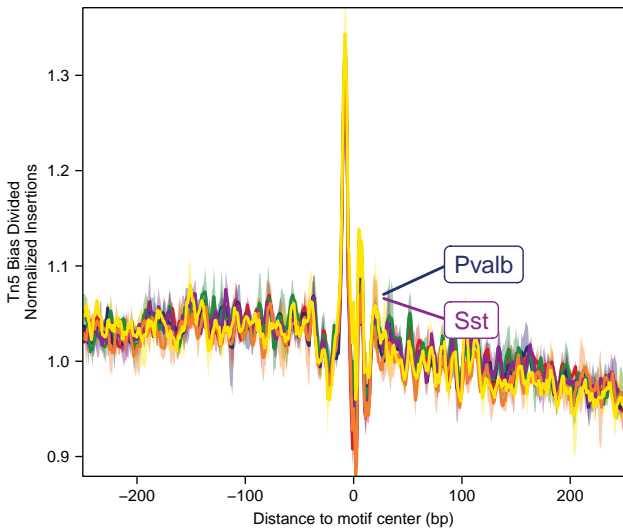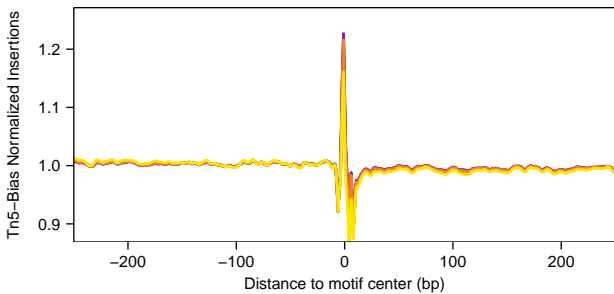

group

|       |      |           |
|-------|------|-----------|
| Lamp5 | Snog | Sst Chodl |
| Pvalb | Sst  | Vip       |



Pparg..Rxra\_13

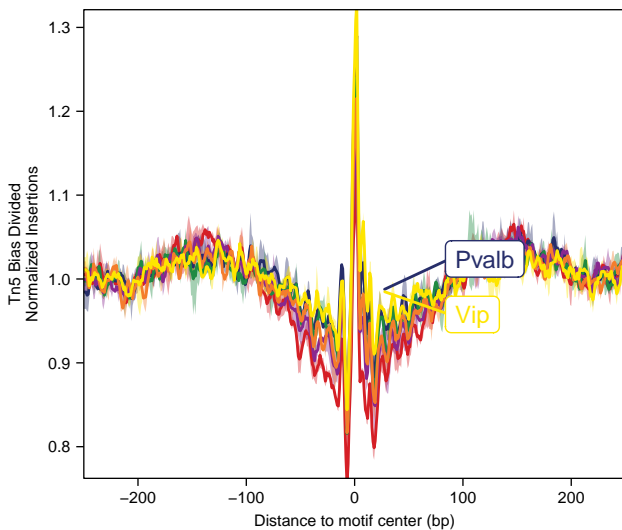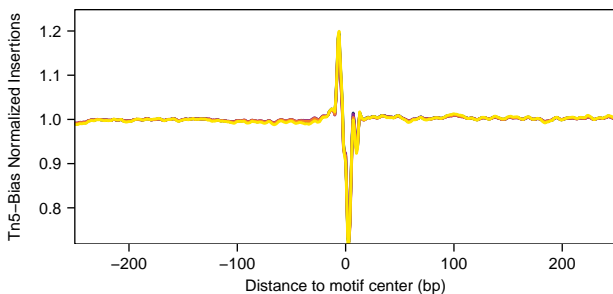

group

|       |      |           |
|-------|------|-----------|
| Lamp5 | Sneg | Sst Chodl |
| Pvalb | Sst  | Vip       |

Arid3a\_14

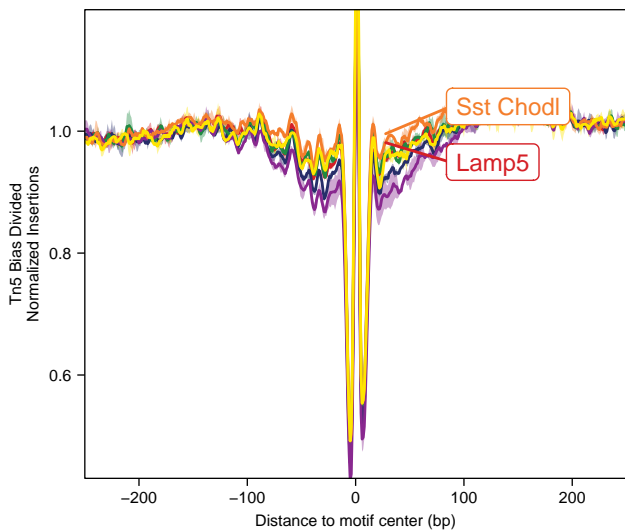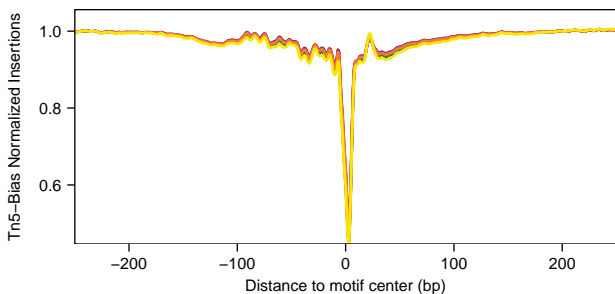

group

|       |      |           |
|-------|------|-----------|
| Lamp5 | Sncg | Sst Chodl |
| Pvalb | Sst  | Vip       |

NFATC2\_15

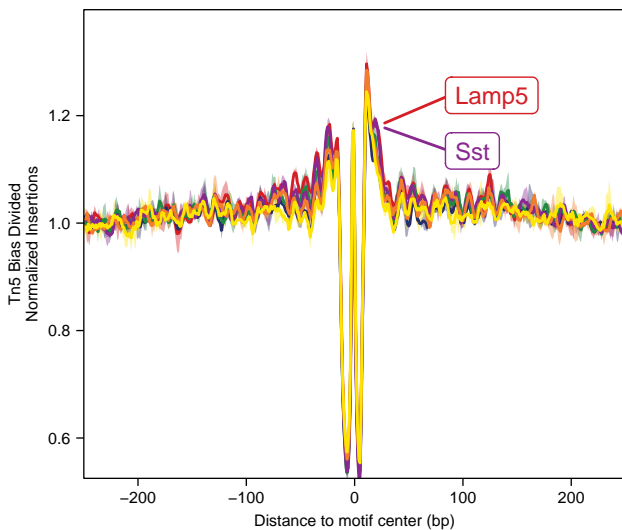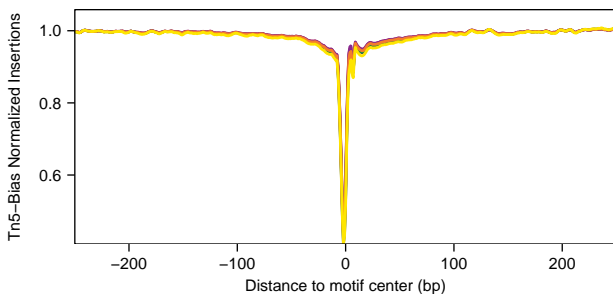

group

|                                           |                                           |                                                 |
|-------------------------------------------|-------------------------------------------|-------------------------------------------------|
| <span style="color: red;">■</span> Lamp5  | <span style="color: green;">■</span> Sneg | <span style="color: orange;">■</span> Sst Chodl |
| <span style="color: blue;">■</span> Pvalb | <span style="color: purple;">■</span> Sst | <span style="color: yellow;">■</span> Vip       |

NR4A2\_16

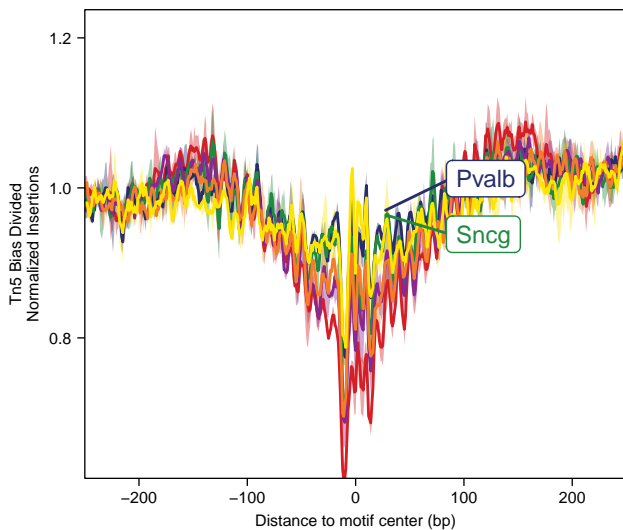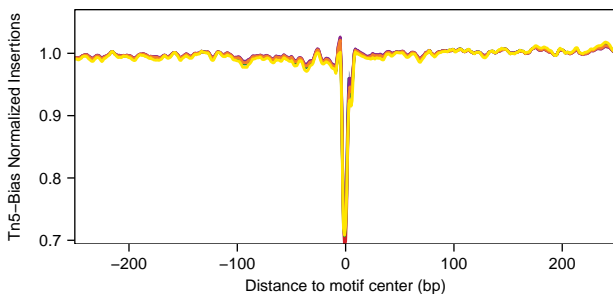

group

|       |      |           |
|-------|------|-----------|
| Lamp5 | Sncg | Sst Chodl |
| Pvalb | Sst  | Vip       |

Nr2e3\_17

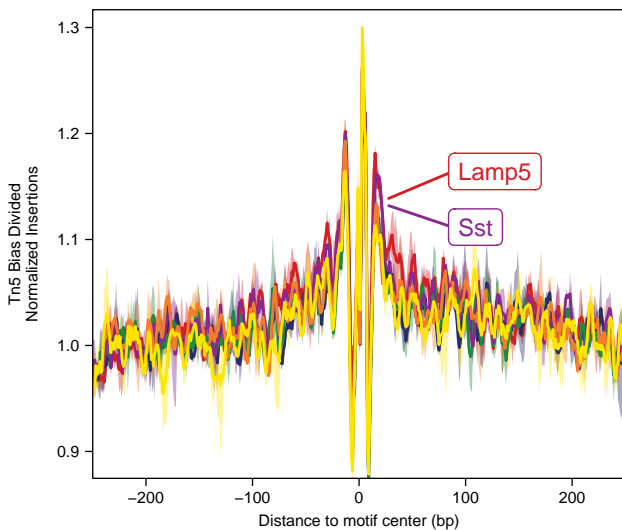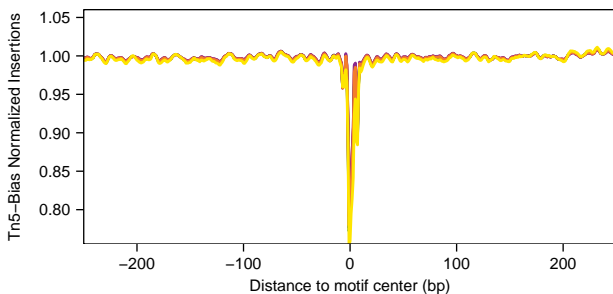

group

|       |      |           |
|-------|------|-----------|
| Lamp5 | Snog | Sst Chodl |
| Pvalb | Sst  | Vip       |

ARNT..HIF1A\_18

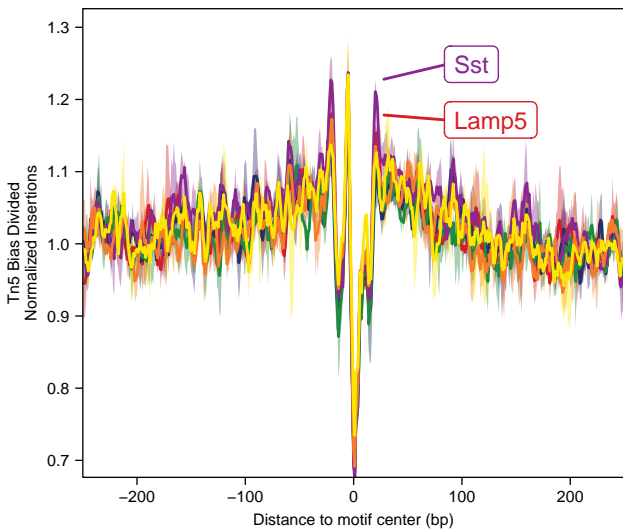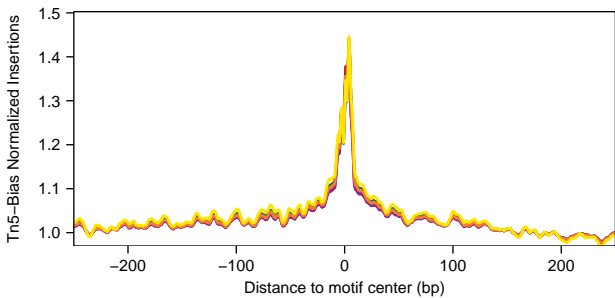

group

|       |      |           |
|-------|------|-----------|
| Lamp5 | Snog | Sst Chodl |
| Pvalb | Sst  | Vip       |

Zfx\_19

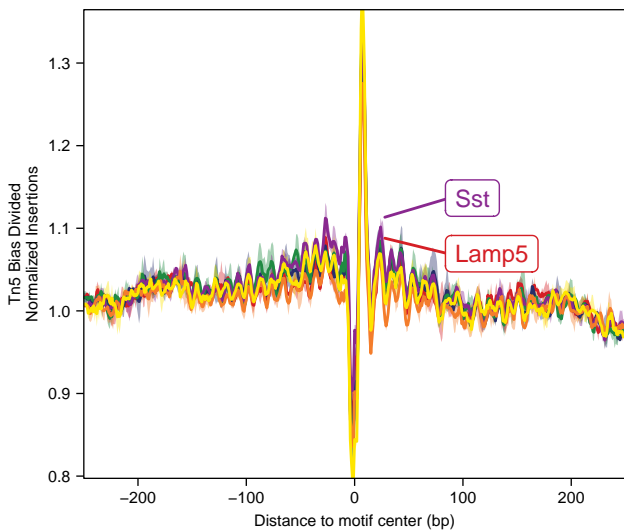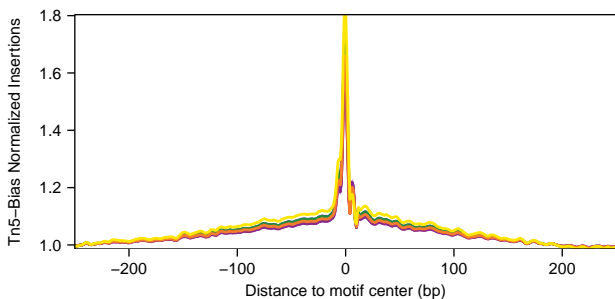

group

|                                           |                                           |                                                 |
|-------------------------------------------|-------------------------------------------|-------------------------------------------------|
| <span style="color: red;">■</span> Lamp5  | <span style="color: green;">■</span> Sneg | <span style="color: orange;">■</span> Sst Chodl |
| <span style="color: blue;">■</span> Pvalb | <span style="color: purple;">■</span> Sst | <span style="color: yellow;">■</span> Vip       |

Crx\_20

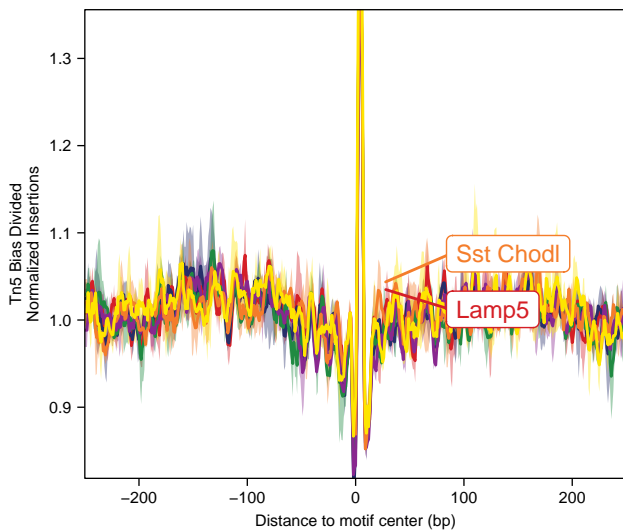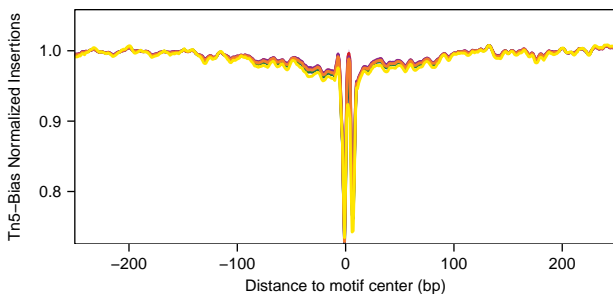

group

|       |      |           |
|-------|------|-----------|
| Lamp5 | Snog | Sst Chodl |
| Pvalb | Sst  | Vip       |



Foxo1\_21

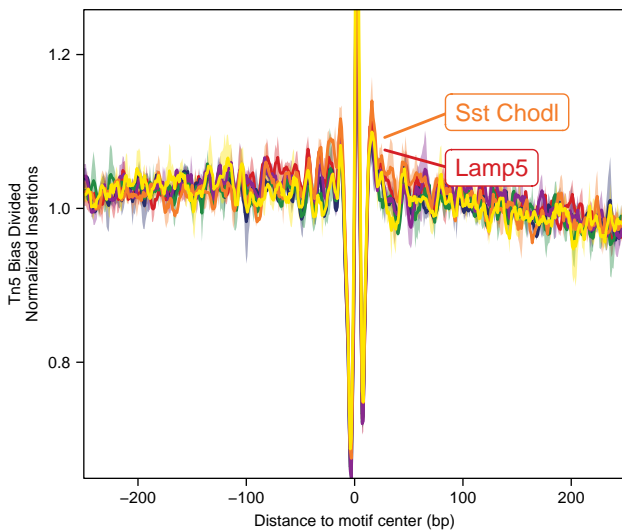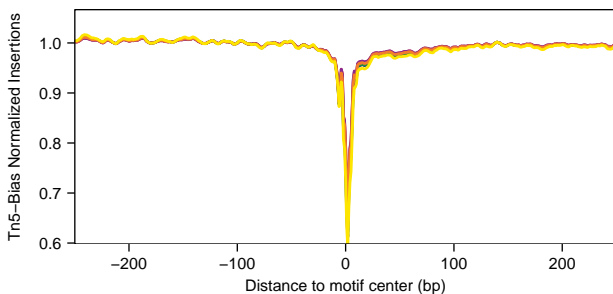

group

|       |      |           |
|-------|------|-----------|
| Lamp5 | Sneg | Sst Chodl |
| Pvalb | Sst  | Vip       |

Gfi1b\_22

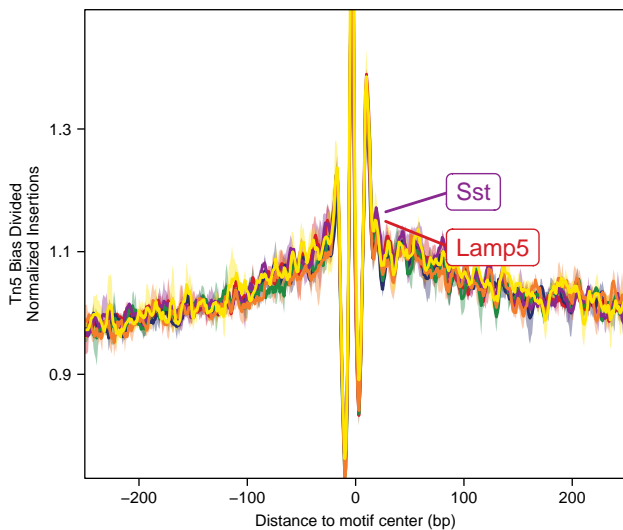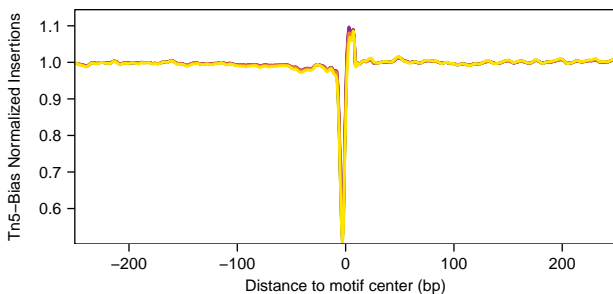

group

|                                           |                                           |                                                 |
|-------------------------------------------|-------------------------------------------|-------------------------------------------------|
| <span style="color: red;">■</span> Lamp5  | <span style="color: green;">■</span> Sneg | <span style="color: orange;">■</span> Sst Chodl |
| <span style="color: blue;">■</span> Pvalb | <span style="color: purple;">■</span> Sst | <span style="color: yellow;">■</span> Vip       |

Klf1\_23

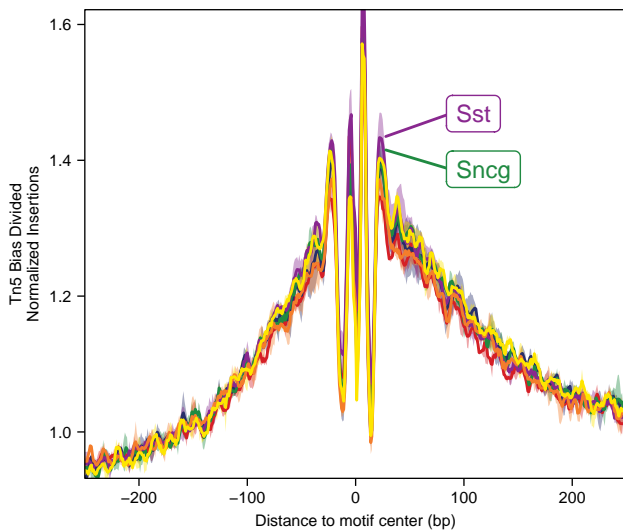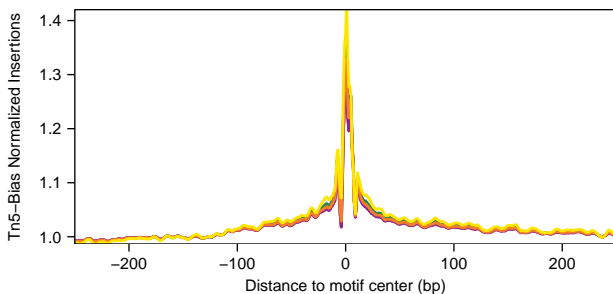

group

|       |      |           |
|-------|------|-----------|
| Lamp5 | Sncg | Sst Chodl |
| Pvalb | Sst  | Vip       |

Nr1h3..Rxra\_24

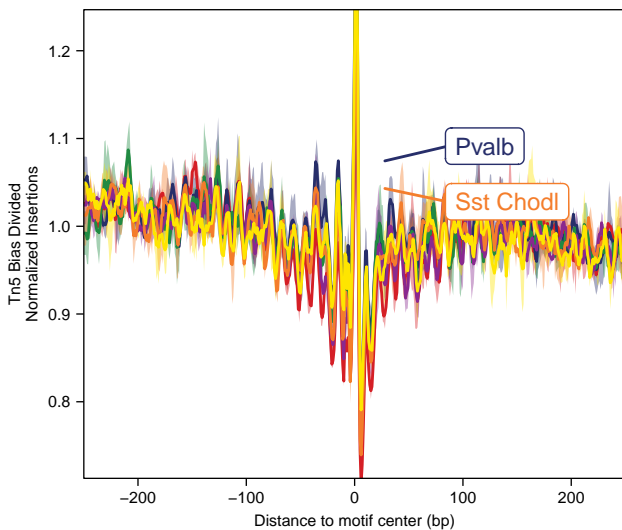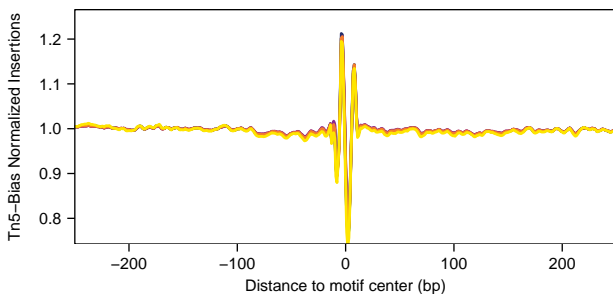

group

|       |      |           |
|-------|------|-----------|
| Lamp5 | Sneg | Sst Chodl |
| Pvalb | Sst  | Vip       |

Nkx2.5.var.2\_25

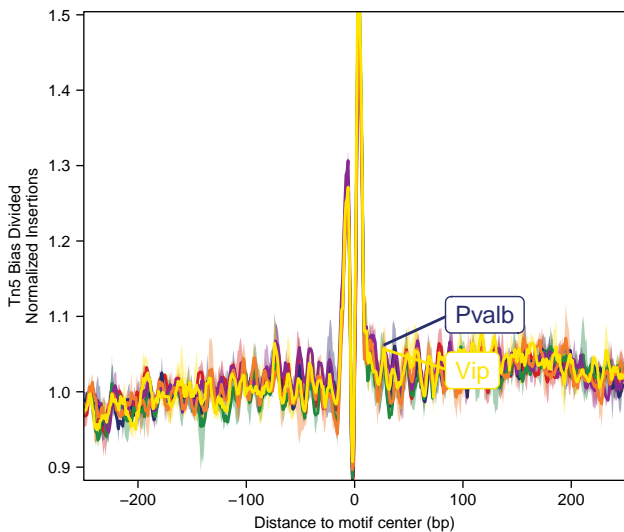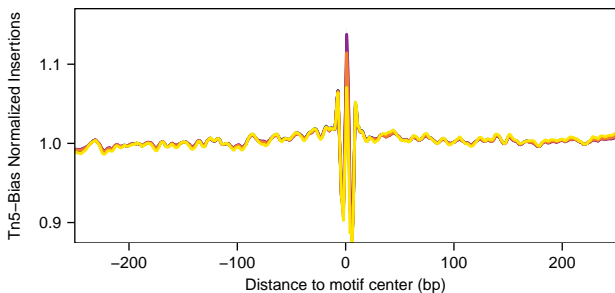

group

|       |      |           |
|-------|------|-----------|
| Lamp5 | Sneg | Sst Chodl |
| Pvalb | Sst  | Vip       |

Nr5a2\_26

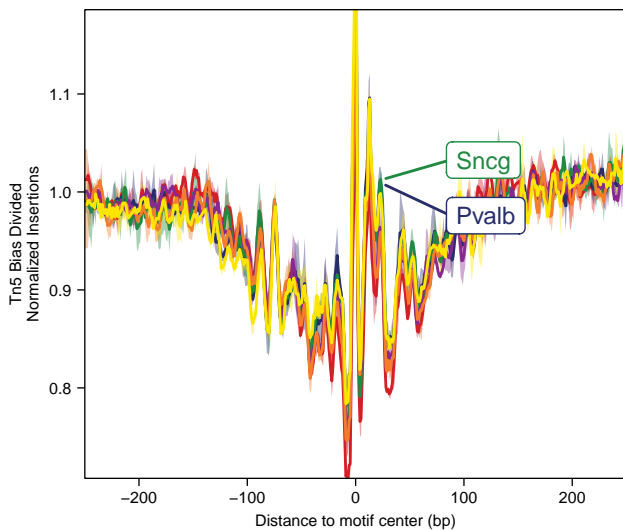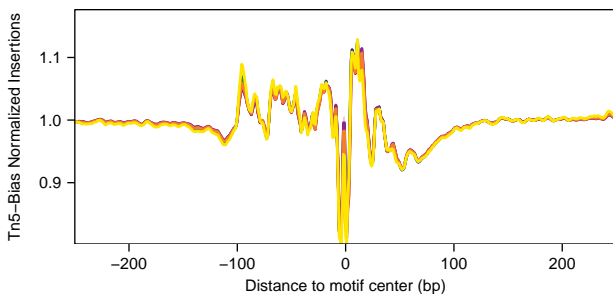

group

|       |      |           |
|-------|------|-----------|
| Lamp5 | Sncg | Sst Chodl |
| Pvalb | Sst  | Vip       |

Sox3\_27

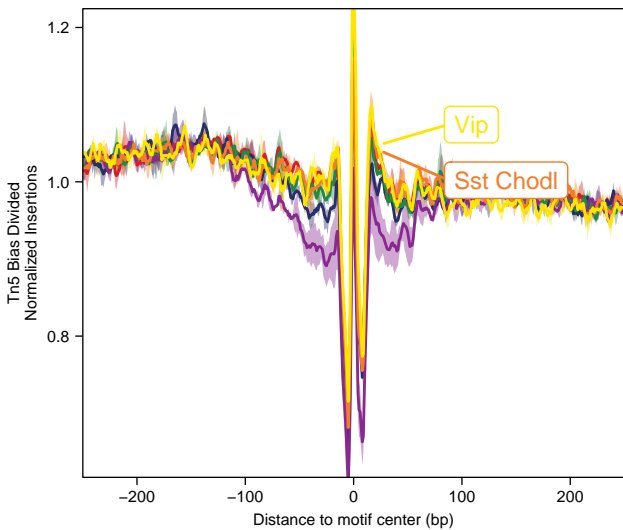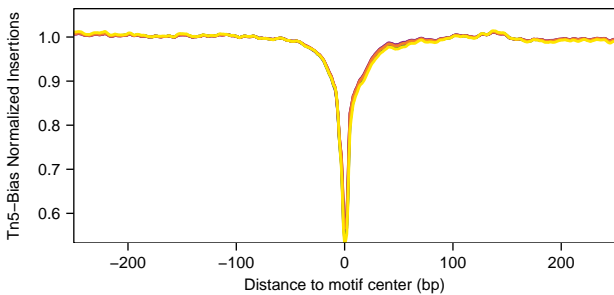

group

|       |      |           |
|-------|------|-----------|
| Lamp5 | Snog | Sst Chodl |
| Pvalb | Sst  | Vip       |

Sox6\_28

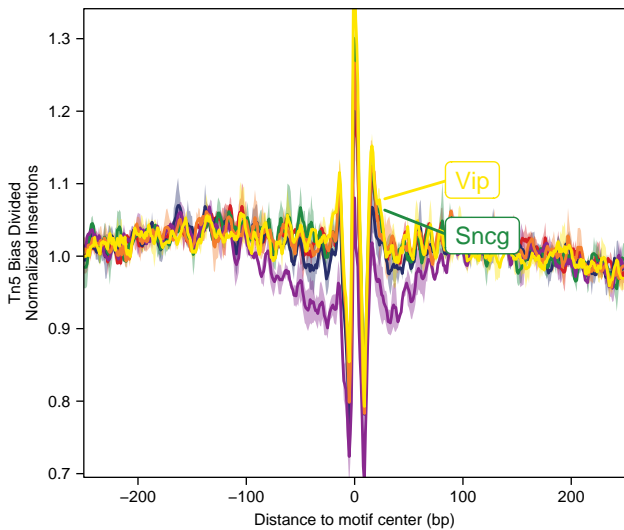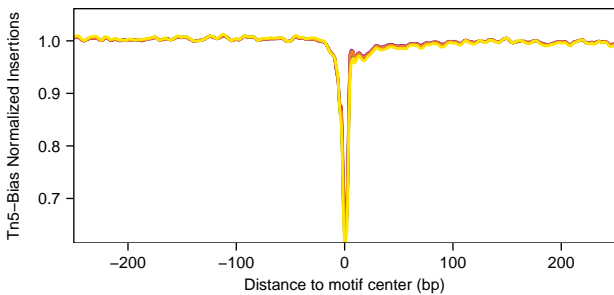

group

|       |      |           |
|-------|------|-----------|
| Lamp5 | Sncg | Sst Chodl |
| Pvalb | Sst  | Vip       |



Stat4\_29

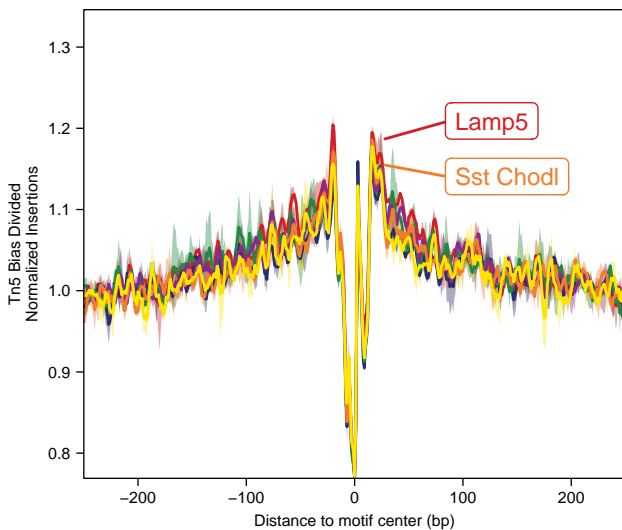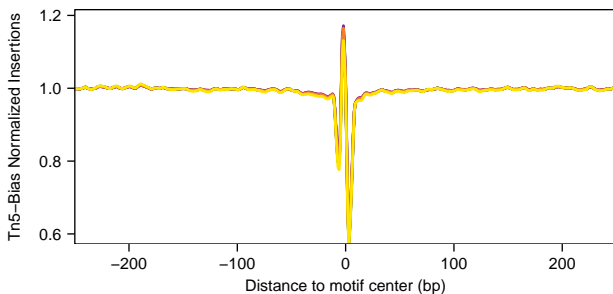

group

|       |      |           |
|-------|------|-----------|
| Lamp5 | Snog | Sst Chodl |
| Pvalb | Sst  | Vip       |

Stat5a..Stat5b\_30

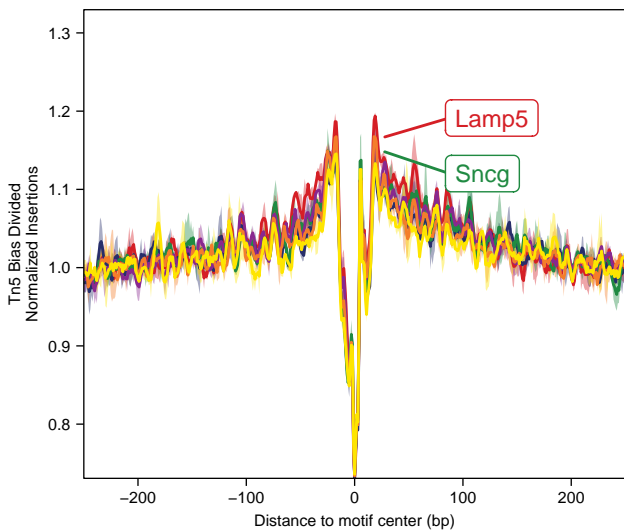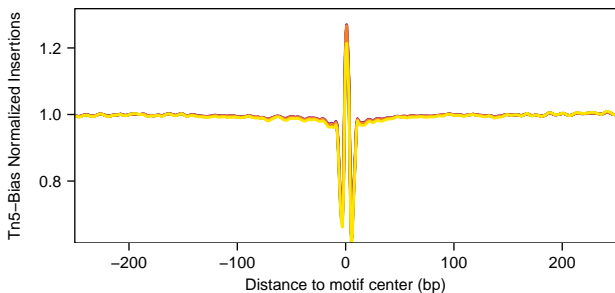

group

|                                           |                                           |                                                 |
|-------------------------------------------|-------------------------------------------|-------------------------------------------------|
| <span style="color: red;">■</span> Lamp5  | <span style="color: green;">■</span> Sncg | <span style="color: orange;">■</span> Sst Chodl |
| <span style="color: blue;">■</span> Pvalb | <span style="color: purple;">■</span> Sst | <span style="color: yellow;">■</span> Vip       |

Stat6\_31

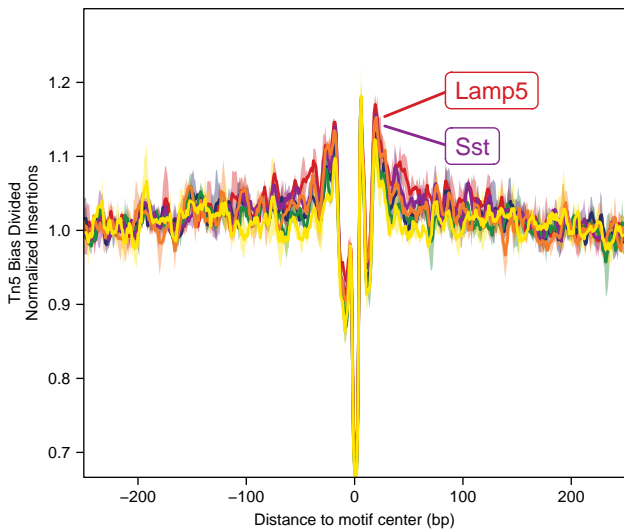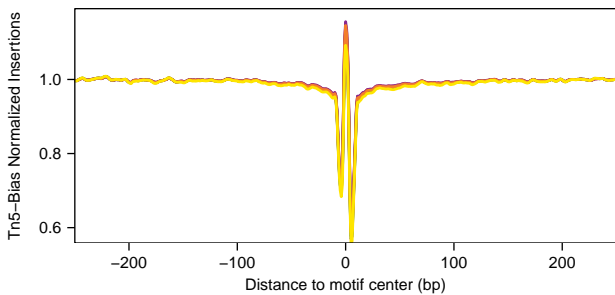

group

|       |      |           |
|-------|------|-----------|
| Lamp5 | Snog | Sst Chodl |
| Pvalb | Sst  | Vip       |

Tcf12\_32

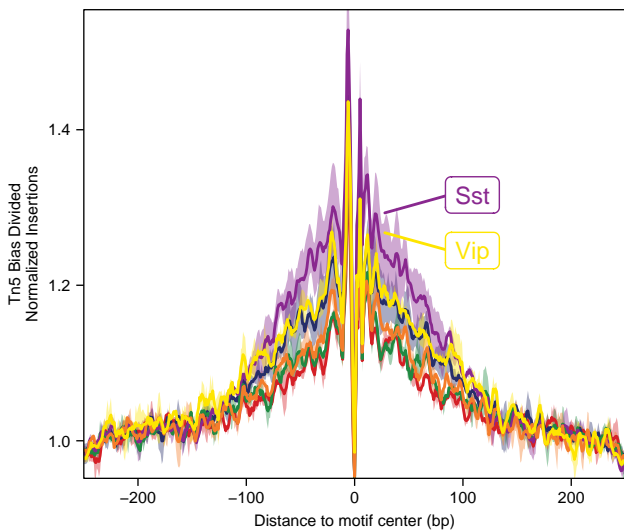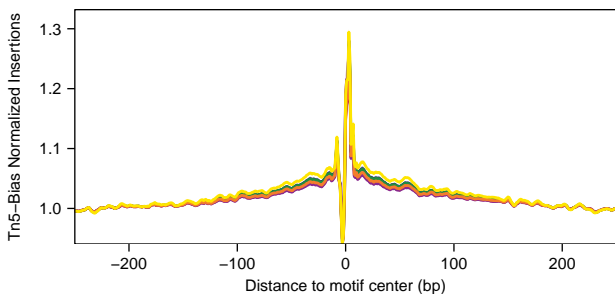

group

|       |      |           |
|-------|------|-----------|
| Lamp5 | Sneg | Sst Chodl |
| Pvalb | Sst  | Vip       |

Nfe2l2\_33

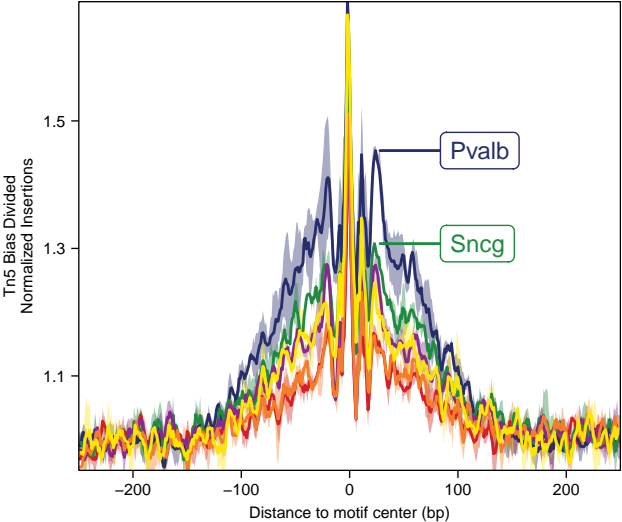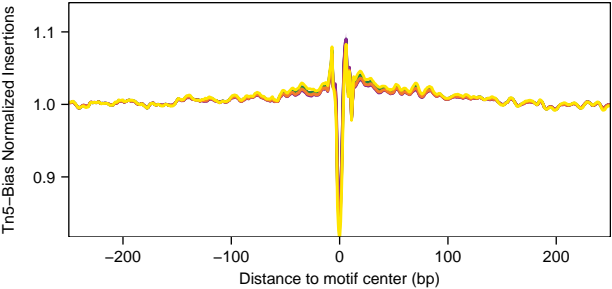

group

|       |      |           |
|-------|------|-----------|
| Lamp5 | Sncg | Sst Chodl |
| Pvalb | Sst  | Vip       |

Bach1..Mafk\_34

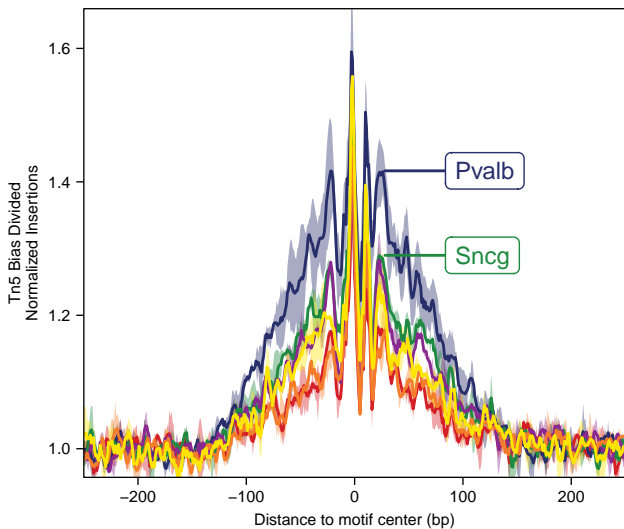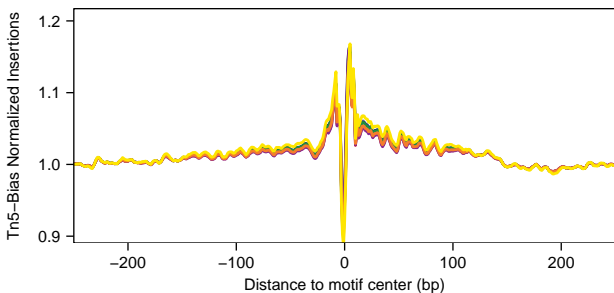

group  
Lamp5 Sncg Sst Chodl  
Pvalb Sst Vip

Arid3b\_35

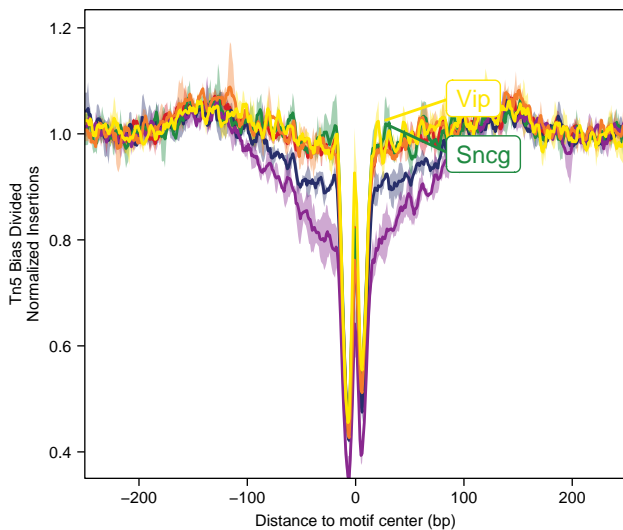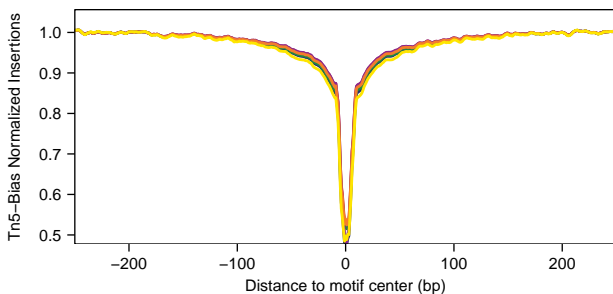

group

|       |      |           |
|-------|------|-----------|
| Lamp5 | Sncg | Sst Chodl |
| Pvalb | Sst  | Vip       |

Arid5a\_36

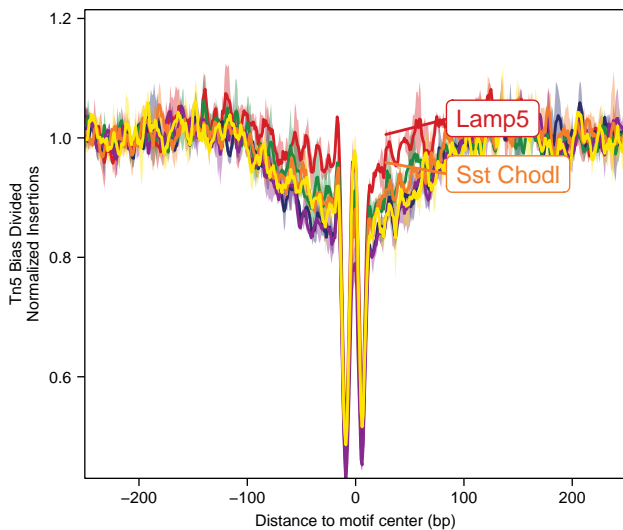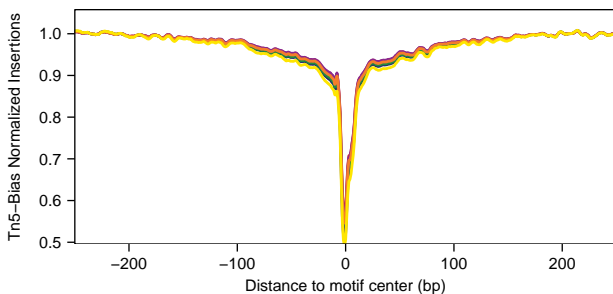

group

|                                           |                                           |                                                 |
|-------------------------------------------|-------------------------------------------|-------------------------------------------------|
| <span style="color: red;">■</span> Lamp5  | <span style="color: green;">■</span> Sneg | <span style="color: orange;">■</span> Sst Chodl |
| <span style="color: blue;">■</span> Pvalb | <span style="color: purple;">■</span> Sst | <span style="color: yellow;">■</span> Vip       |



Arntl\_37

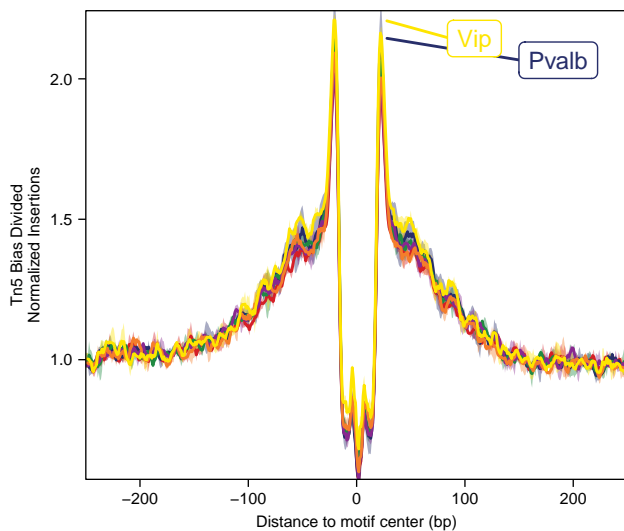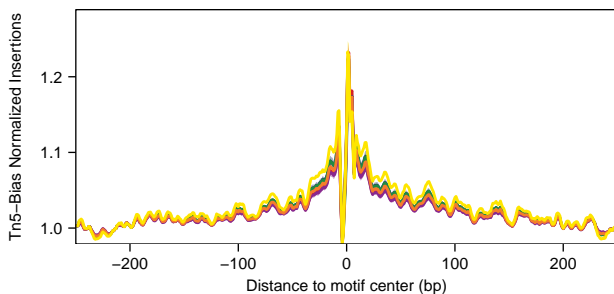

group  
Lamp5 Snog Sst Chodl  
Pvalb Sst Vip

Atf1\_38

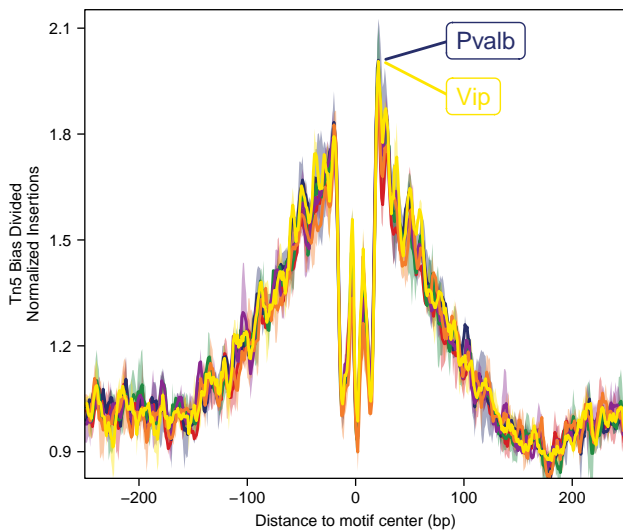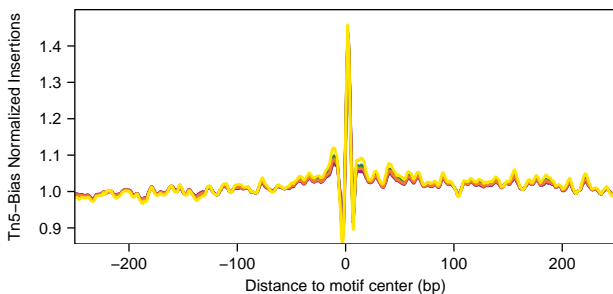

group

|       |      |           |
|-------|------|-----------|
| Lamp5 | Sneg | Sst Chodl |
| Pvalb | Sst  | Vip       |

Bhlha15\_39

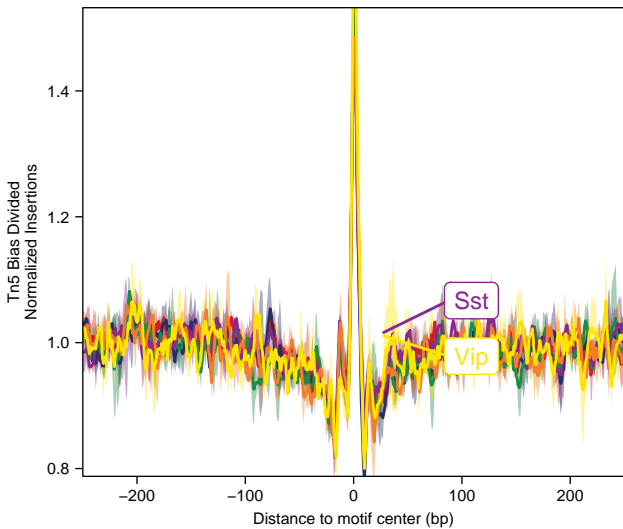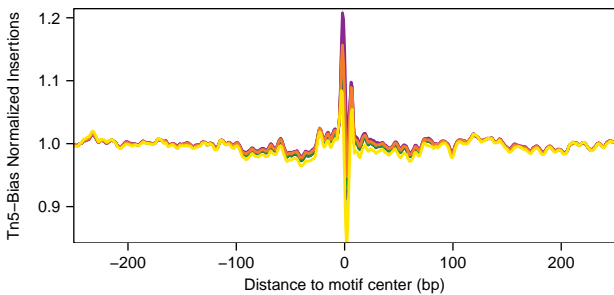

group

|       |      |           |
|-------|------|-----------|
| Lamp5 | Snog | Sst Chodl |
| Pvalb | Sst  | Vip       |

Creb3l2\_40

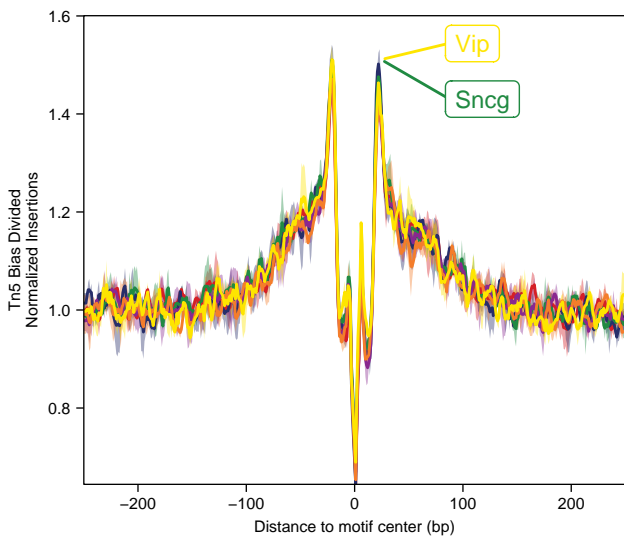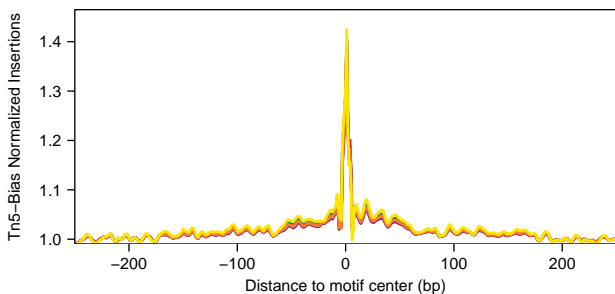

group

|       |      |           |
|-------|------|-----------|
| Lamp5 | Sncg | Sst Chodl |
| Pvalb | Sst  | Vip       |

Dux\_41

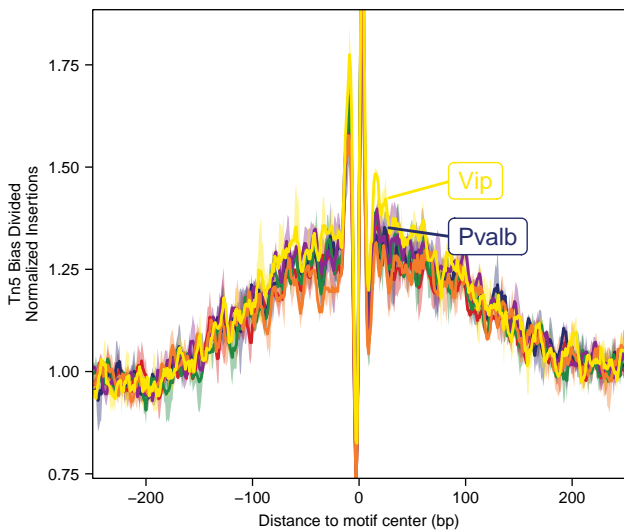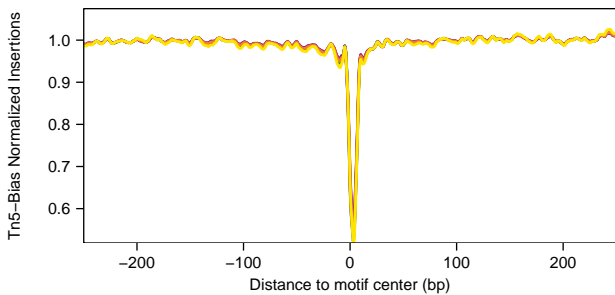

group  
Lamp5 Sncg Sst Chodl  
Pvalb Sst Vip

Foxj2\_42

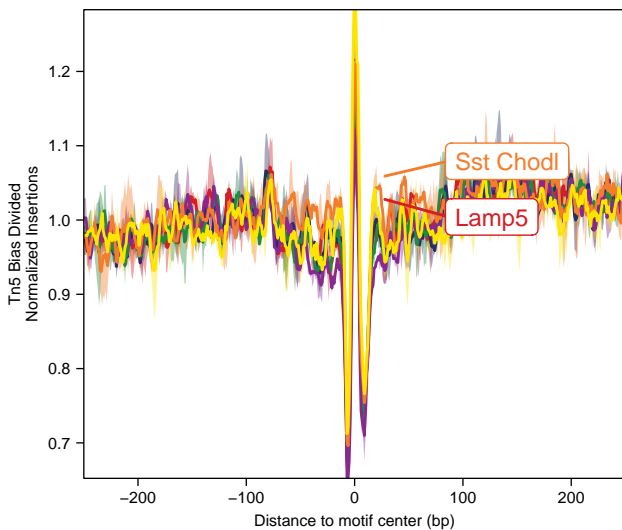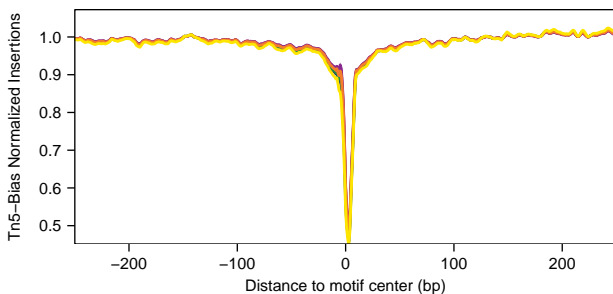

group

|       |      |           |
|-------|------|-----------|
| Lamp5 | Snog | Sst Chodl |
| Pvalb | Sst  | Vip       |

Gmeb1\_43

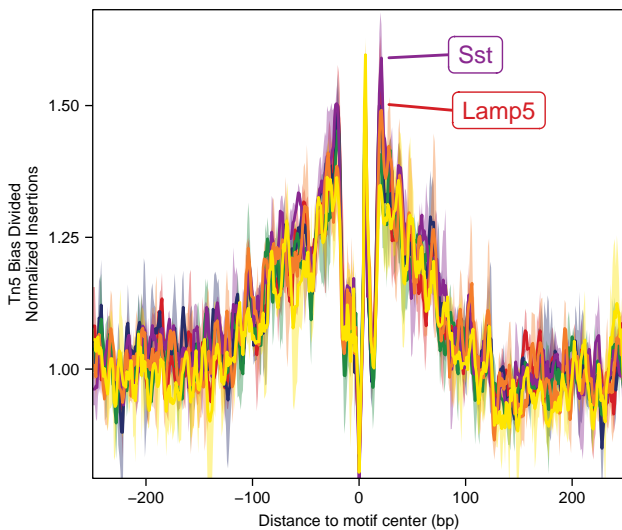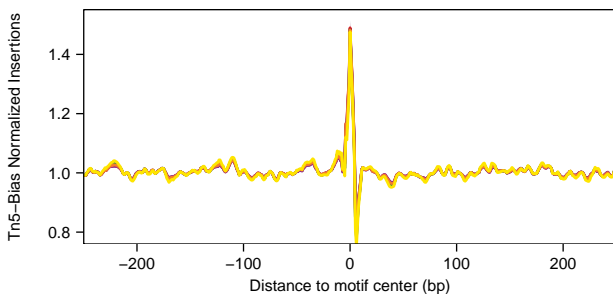

group  
Lamp5 Sncg Sst Chodl  
Pvalb Sst Vip

Mlxip\_44

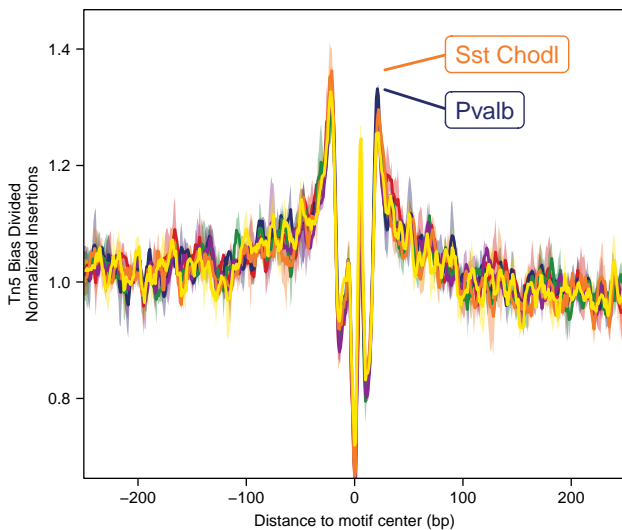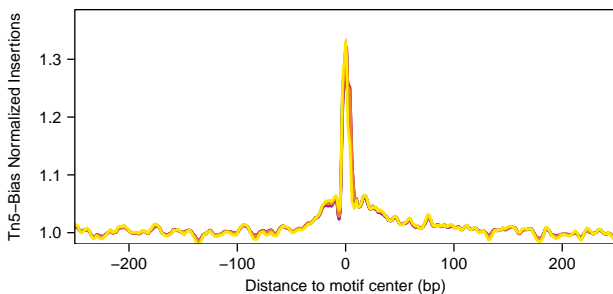

group

|       |      |           |
|-------|------|-----------|
| Lamp5 | Sncg | Sst Chodl |
| Pvalb | Sst  | Vip       |



Npas2\_45

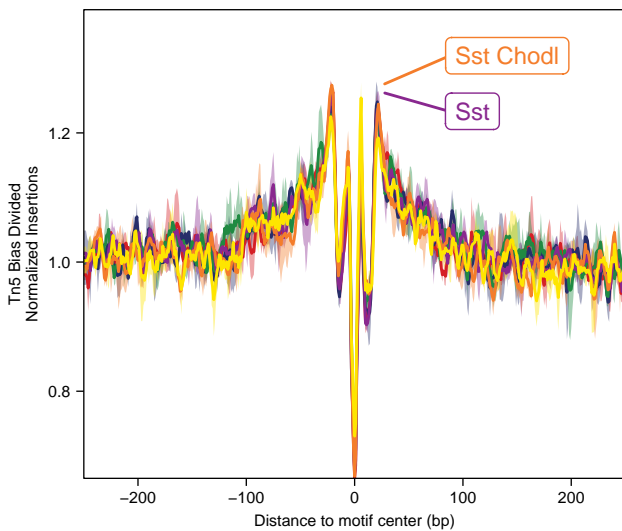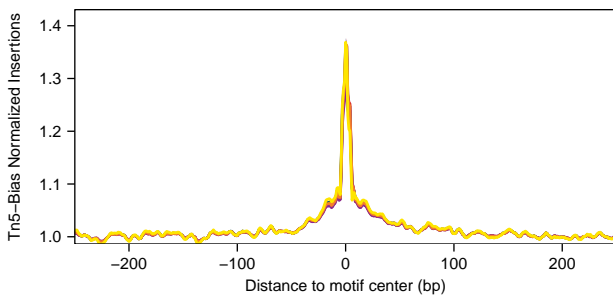

group

|       |      |           |
|-------|------|-----------|
| Lamp5 | Sneg | Sst Chodl |
| Pvalb | Sst  | Vip       |

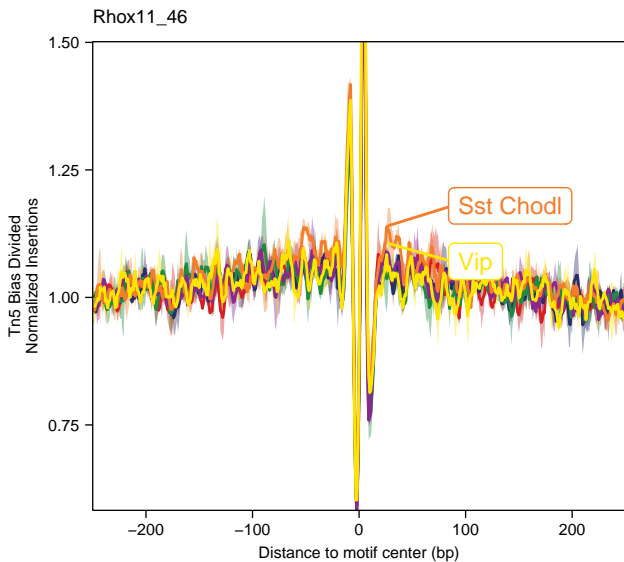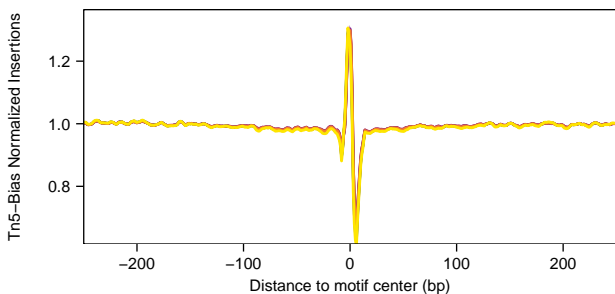

group

|       |      |           |
|-------|------|-----------|
| Lamp5 | Sncg | Sst Chodl |
| Pvalb | Sst  | Vip       |

Six3\_47

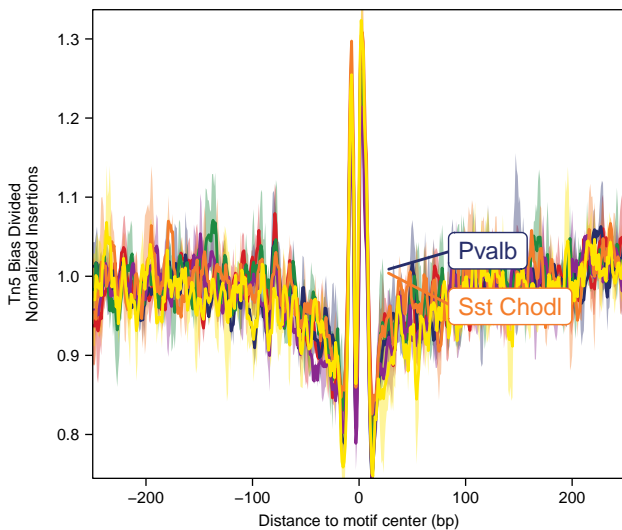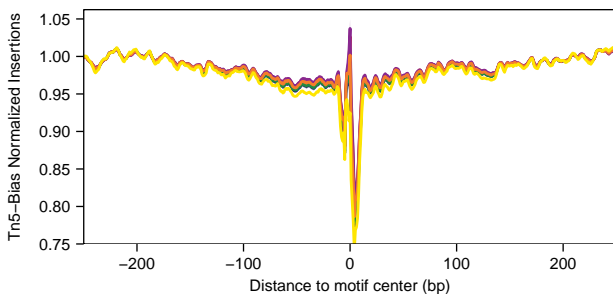

group

|       |      |           |
|-------|------|-----------|
| Lamp5 | Sncg | Sst Chodl |
| Pvalb | Sst  | Vip       |

Twist2\_48

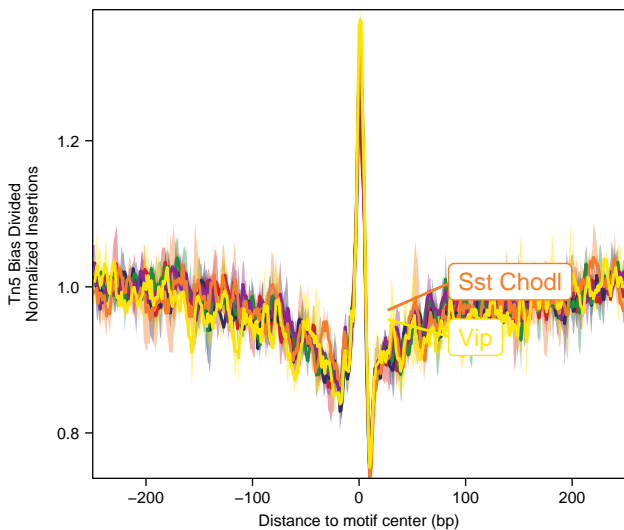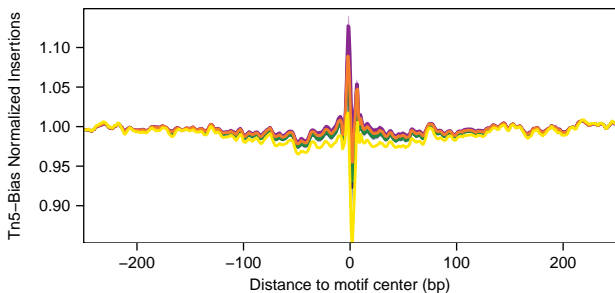

group

|       |      |           |
|-------|------|-----------|
| Lamp5 | Sncg | Sst Chodl |
| Pvalb | Sst  | Vip       |

Ar\_49

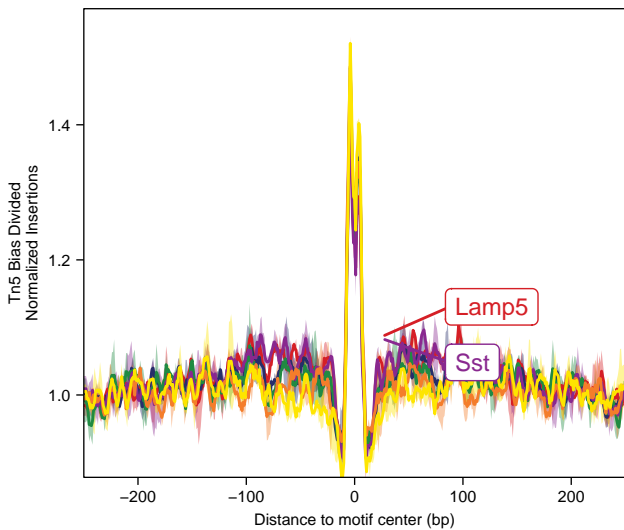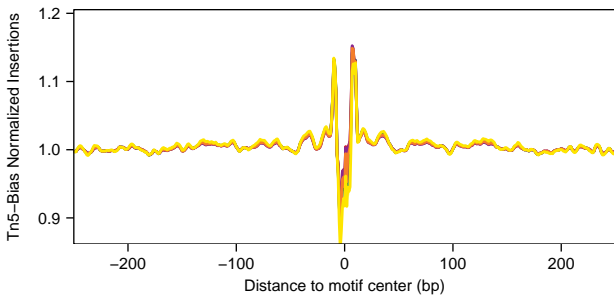

group

|       |      |           |
|-------|------|-----------|
| Lamp5 | Snog | Sst Chodl |
| Pvalb | Sst  | Vip       |

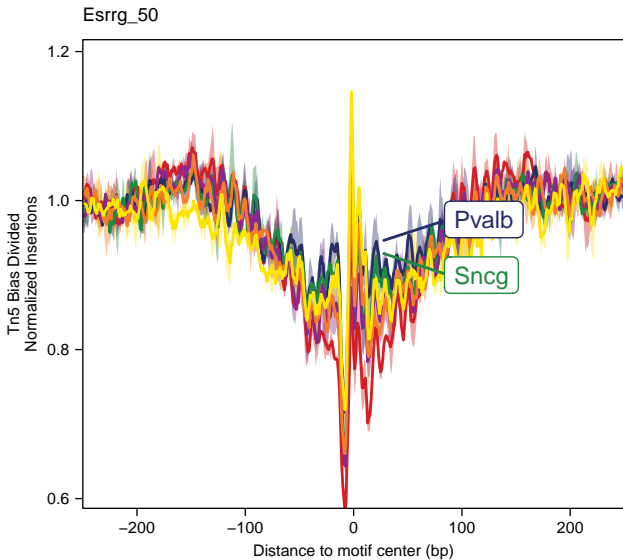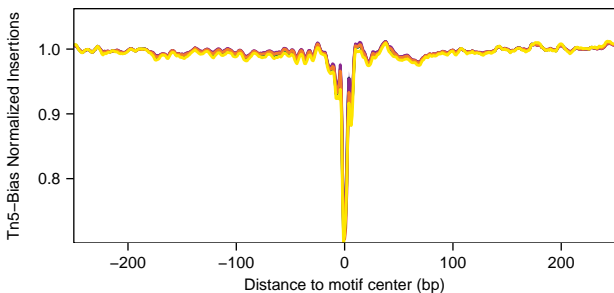

group

|       |      |           |
|-------|------|-----------|
| Lamp5 | Sncg | Sst Chodl |
| Pvalb | Sst  | Vip       |

Nr2e1\_51

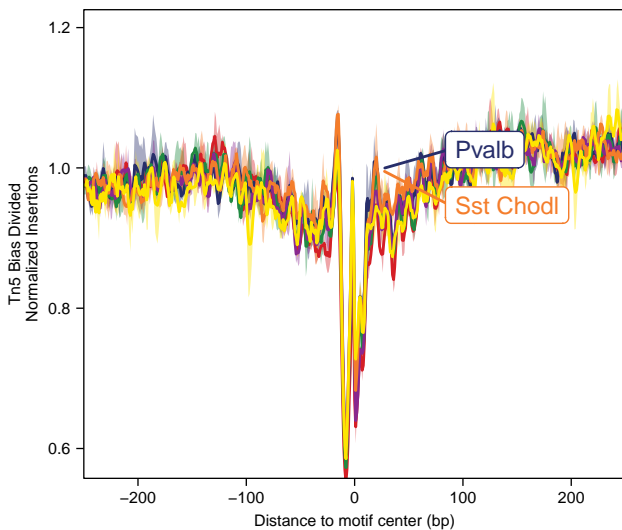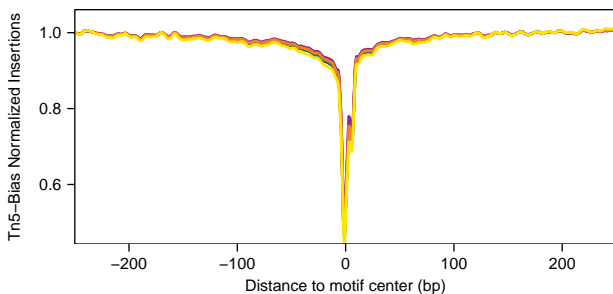

group

|       |      |           |
|-------|------|-----------|
| Lamp5 | Snog | Sst Chodl |
| Pvalb | Sst  | Vip       |

Nr2f6\_52

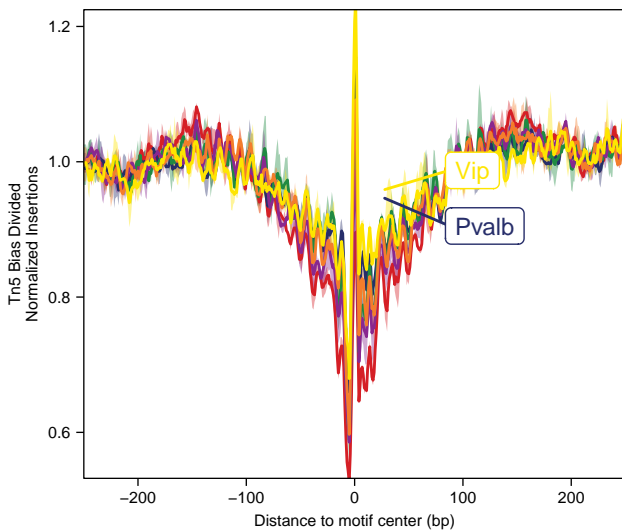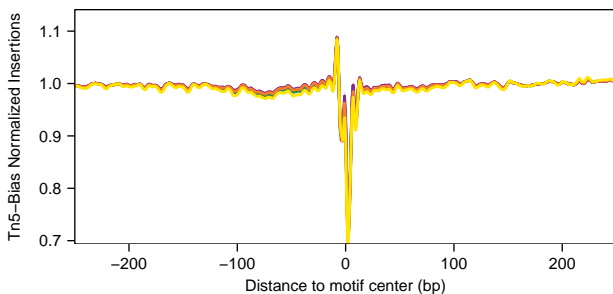

group

|       |      |           |
|-------|------|-----------|
| Lamp5 | Sneg | Sst Chodl |
| Pvalb | Sst  | Vip       |



Rxra\_53

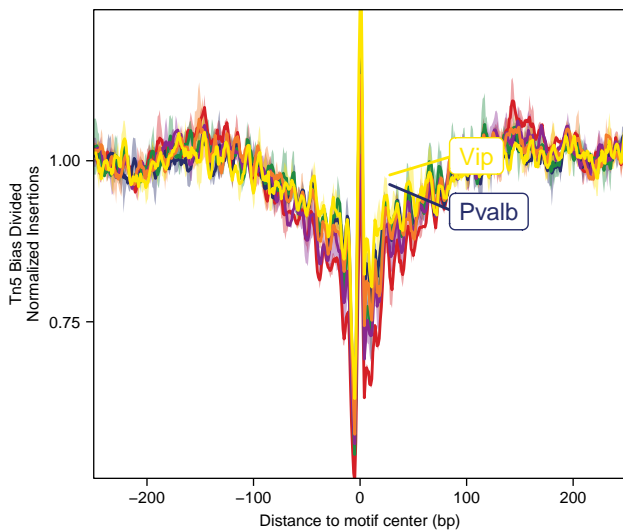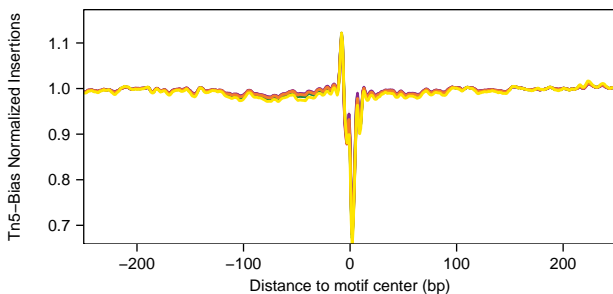

group  
Lamp5 Sncg Sst Chodl  
Pvalb Sst Vip

Lhx4\_54

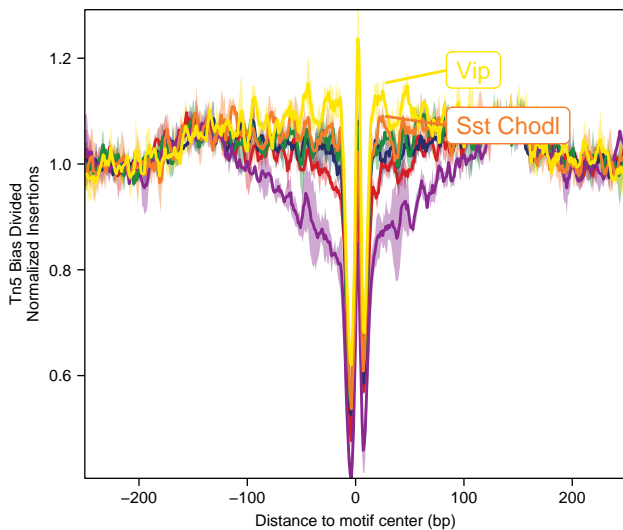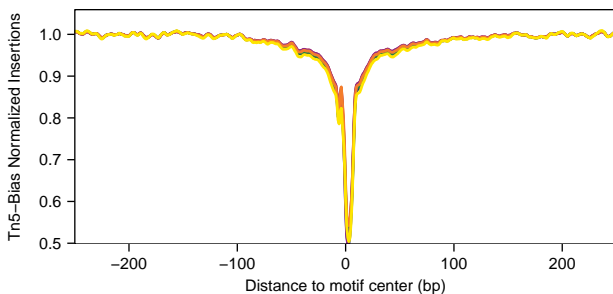

group

|       |      |           |
|-------|------|-----------|
| Lamp5 | SnCG | Sst Chodl |
| Pvalb | Sst  | Vip       |

Lhx8\_55

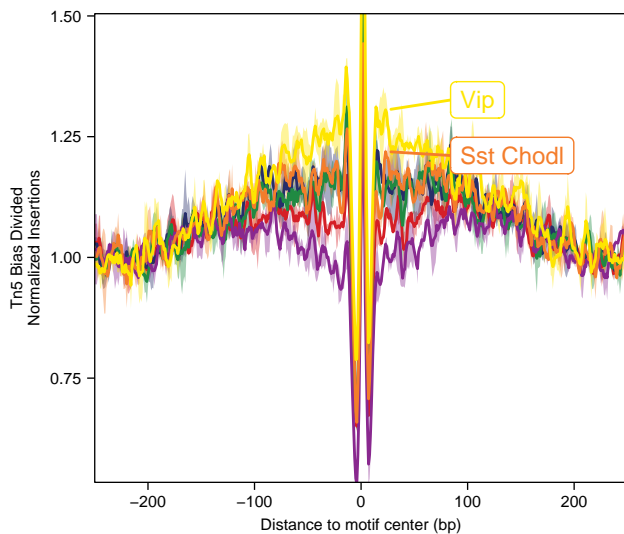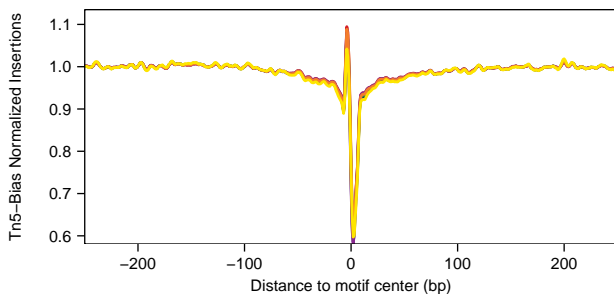

group

|       |      |           |
|-------|------|-----------|
| Lamp5 | Sncg | Sst Chodl |
| Pvalb | Sst  | Vip       |

Msx3\_56

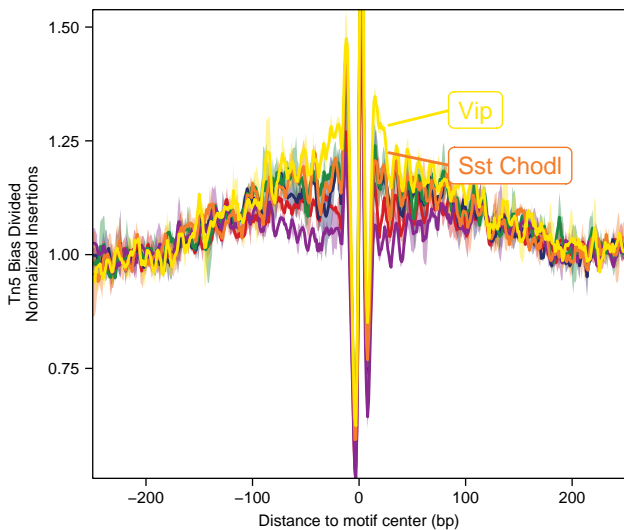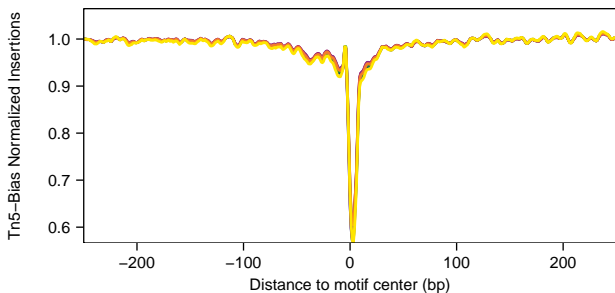

group  
Lamp5 Sncg Sst Chodl  
Pvalb Sst Vip

Nkx3.1\_57

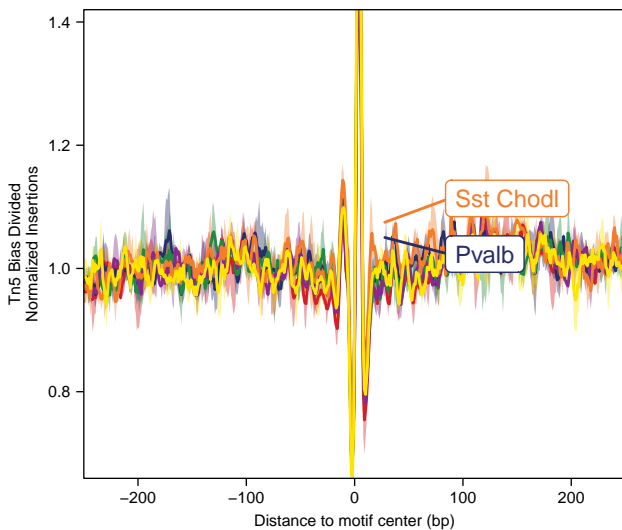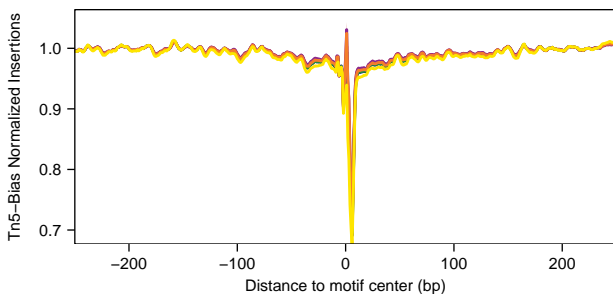

group

|       |      |           |
|-------|------|-----------|
| Lamp5 | Sneg | Sst Chodl |
| Pvalb | Sst  | Vip       |

Shox2\_58

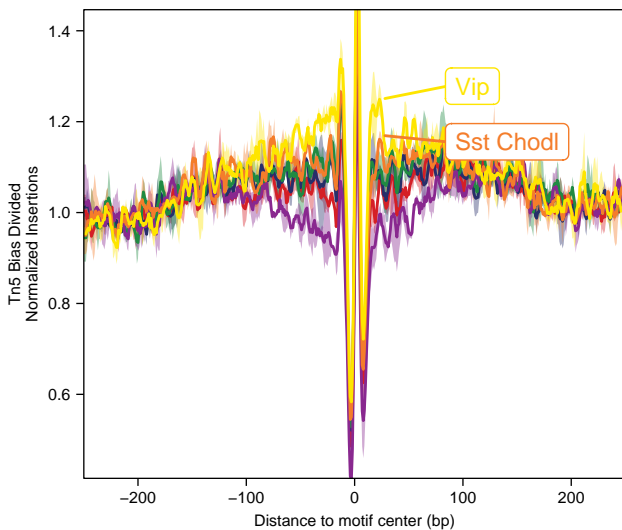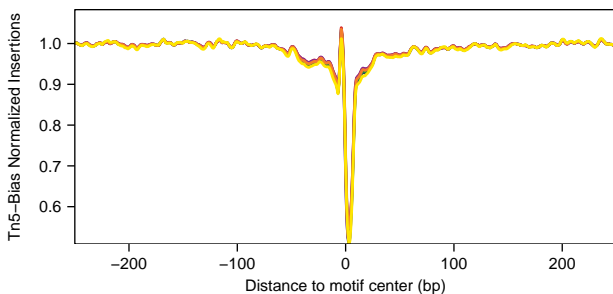

group

|       |      |           |
|-------|------|-----------|
| Lamp5 | Sneg | Sst Chodl |
| Pvalb | Sst  | Vip       |

Nr2f6.var.2\_59

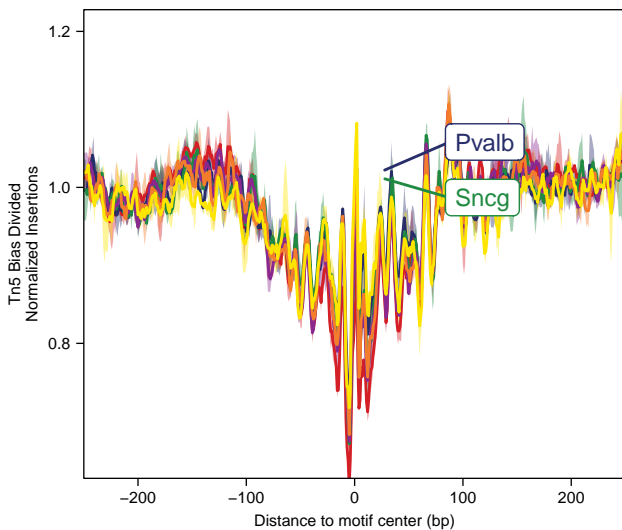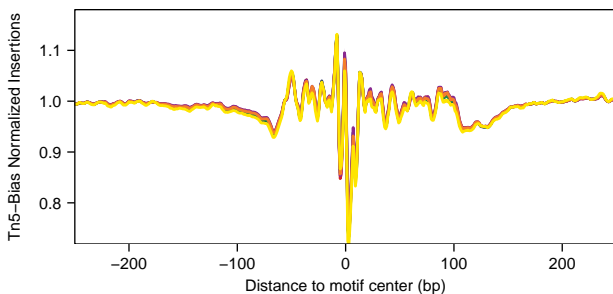

group

|       |      |           |
|-------|------|-----------|
| Lamp5 | Sncg | Sst Chodl |
| Pvalb | Sst  | Vip       |

Hic1\_60

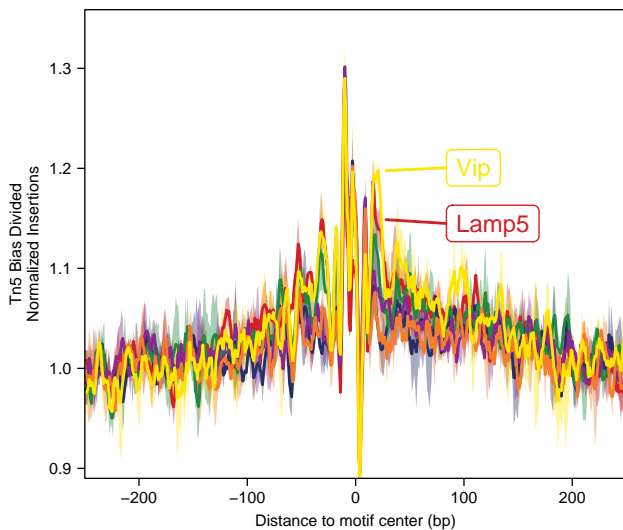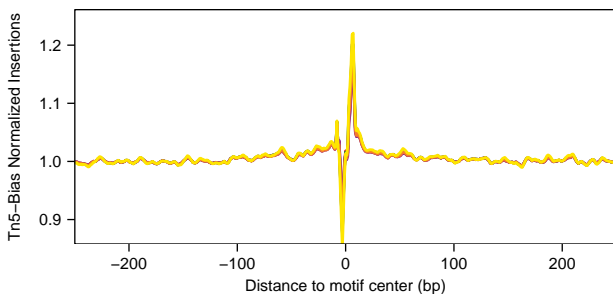

group

|       |      |           |
|-------|------|-----------|
| Lamp5 | Sneg | Sst Chodl |
| Pvalb | Sst  | Vip       |



Klf12\_61

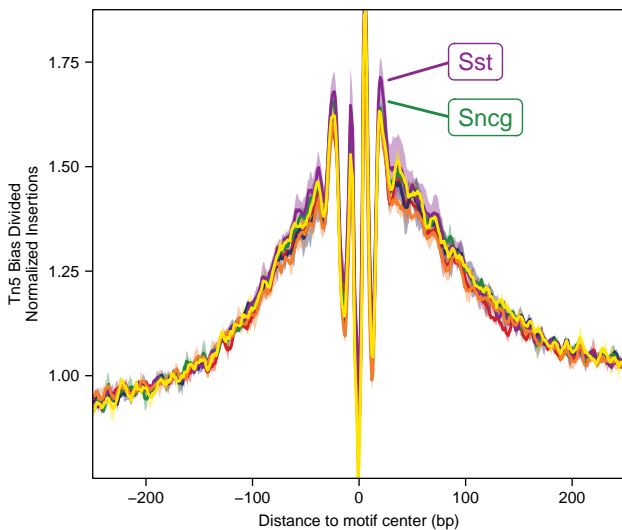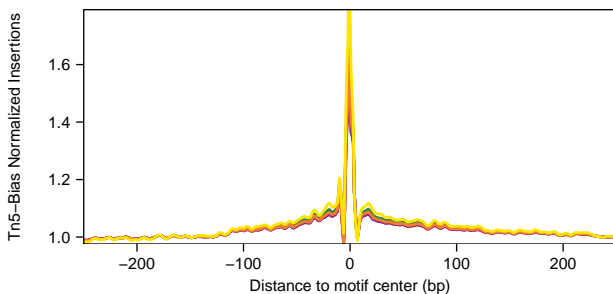

group

|       |      |           |
|-------|------|-----------|
| Lamp5 | Sncg | Sst Chodl |
| Pvalb | Sst  | Vip       |

Ascl2\_62

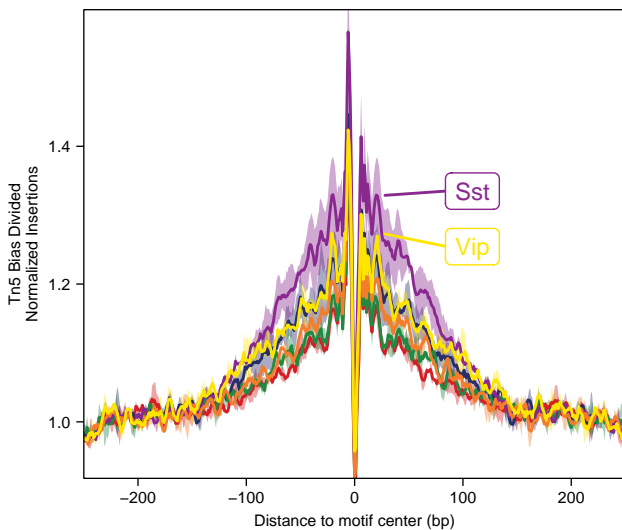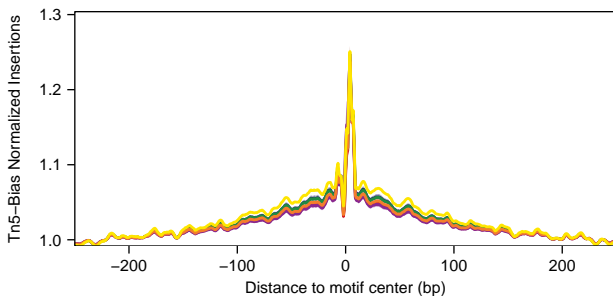

group

|       |       |           |
|-------|-------|-----------|
| Lamp5 | Snai2 | Sst Chodl |
| Pvalb | Sst   | Vip       |

Atoh1\_63

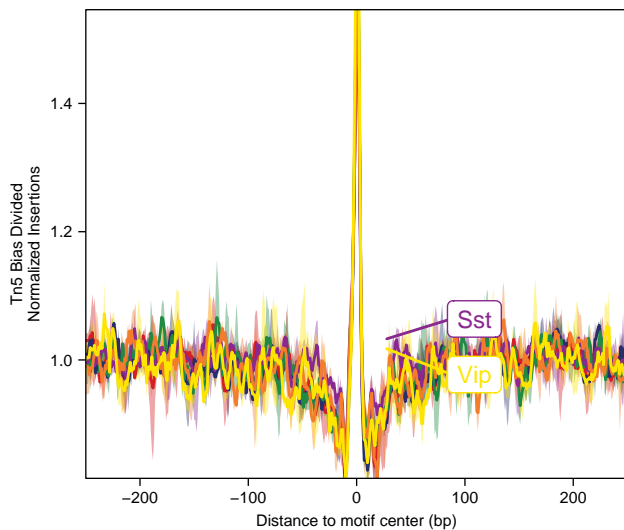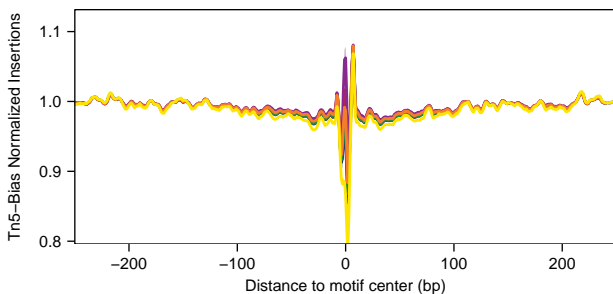

group

|       |      |           |
|-------|------|-----------|
| Lamp5 | Snog | Sst Chodl |
| Pvalb | Sst  | Vip       |

Tcf21\_64

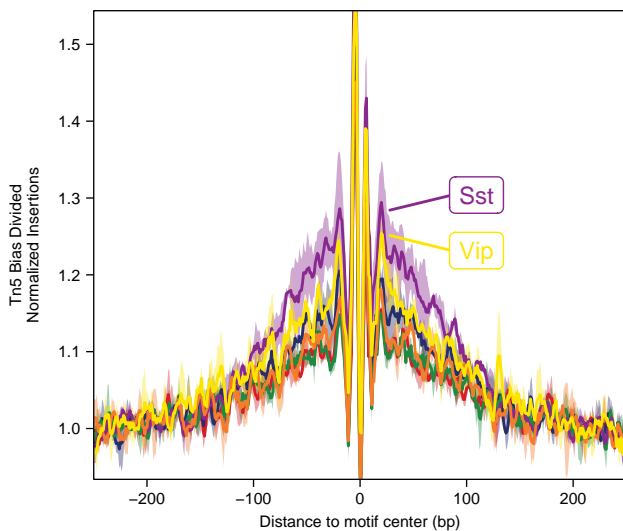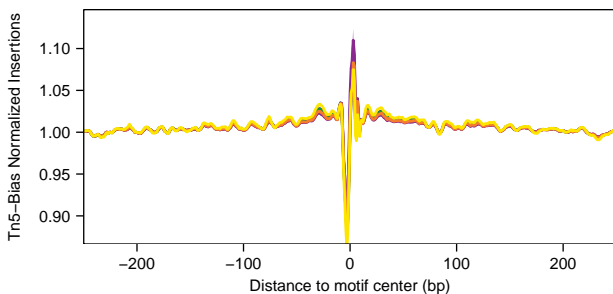

group

|       |      |           |
|-------|------|-----------|
| Lamp5 | Sncg | Sst Chodl |
| Pvalb | Sst  | Vip       |

Creb5\_65

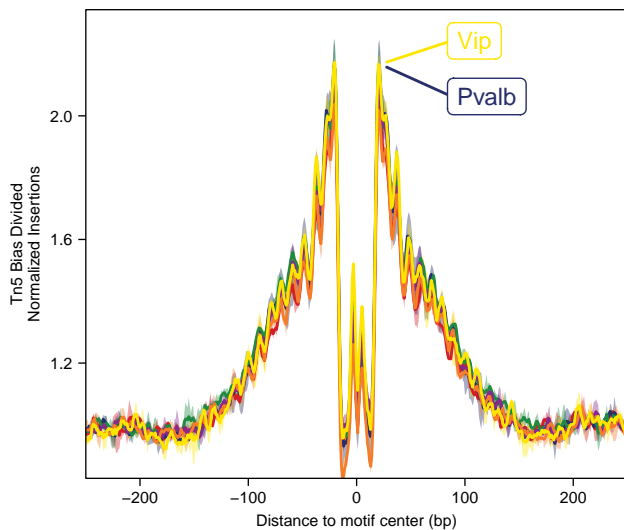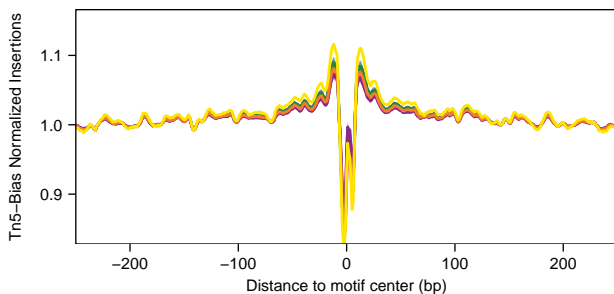

group

|       |      |           |
|-------|------|-----------|
| Lamp5 | Snog | Sst Chodl |
| Pvalb | Sst  | Vip       |

Mafb\_66

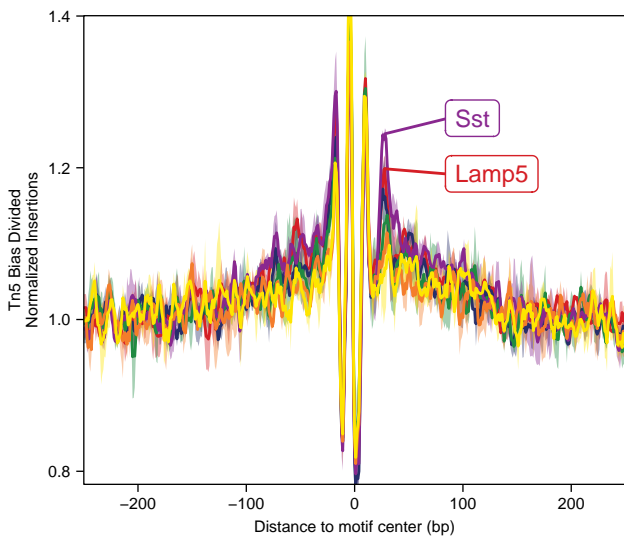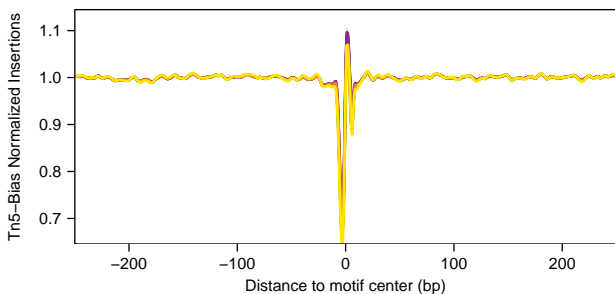

group

|                                           |                                           |                                                 |
|-------------------------------------------|-------------------------------------------|-------------------------------------------------|
| <span style="color: red;">■</span> Lamp5  | <span style="color: green;">■</span> Sneg | <span style="color: orange;">■</span> Sst Chodl |
| <span style="color: blue;">■</span> Pvalb | <span style="color: purple;">■</span> Sst | <span style="color: yellow;">■</span> Vip       |

Foxj3\_67

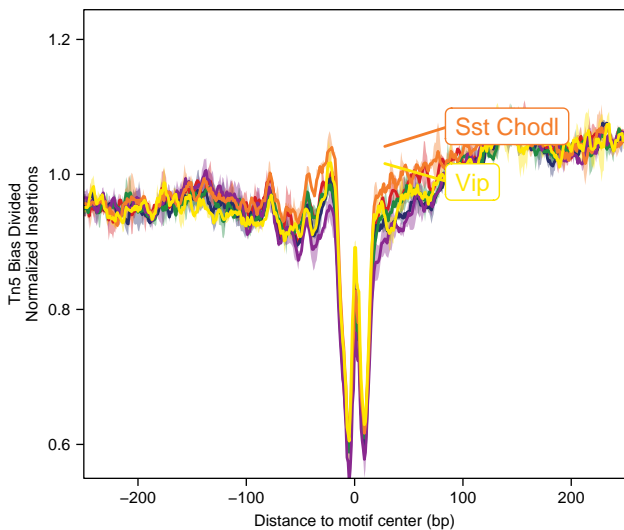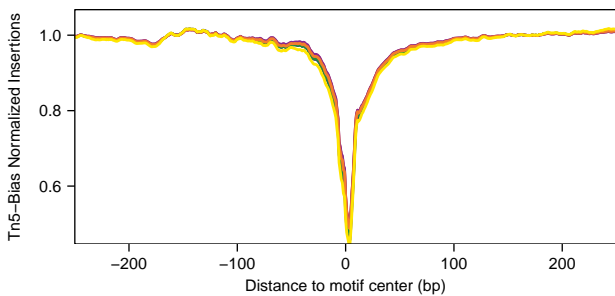

group

|       |      |           |
|-------|------|-----------|
| Lamp5 | Sneg | Sst Chodl |
| Pvalb | Sst  | Vip       |

Alx4\_68

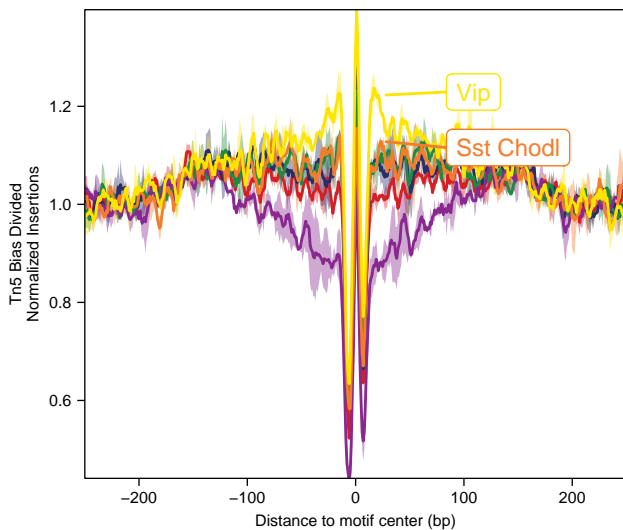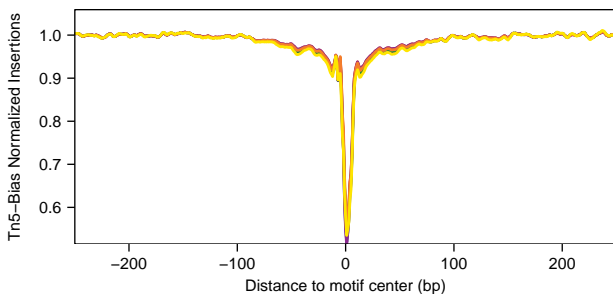

group  
Lamp5 Sncg Sst Chodl  
Pvalb Sst Vip



Alx1\_69

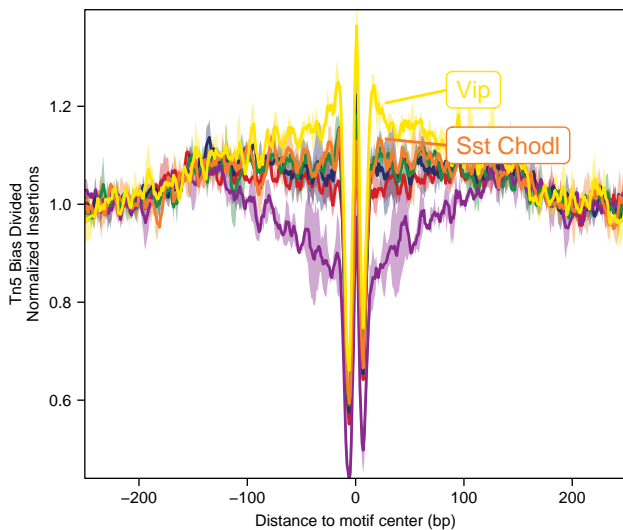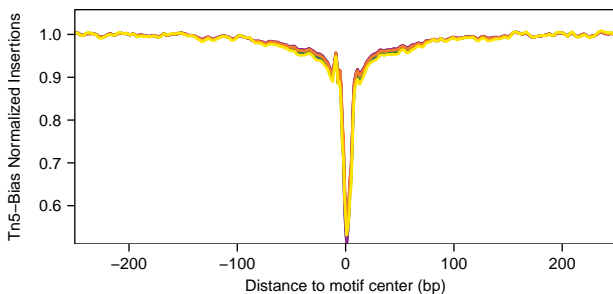

group

|       |      |           |
|-------|------|-----------|
| Lamp5 | Sncg | Sst Chodl |
| Pvalb | Sst  | Vip       |

Rarb\_70

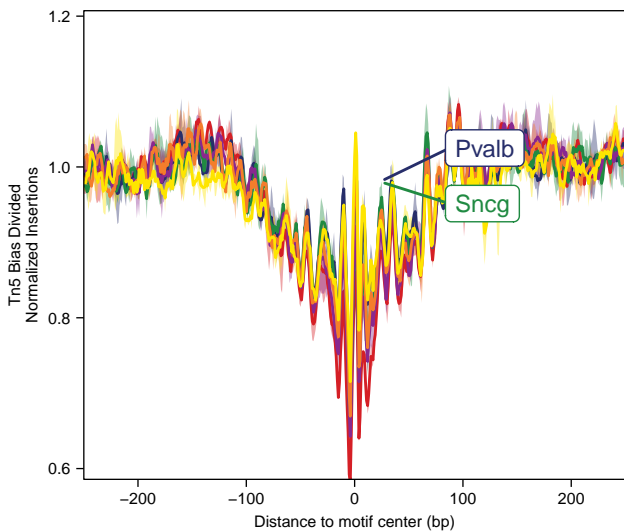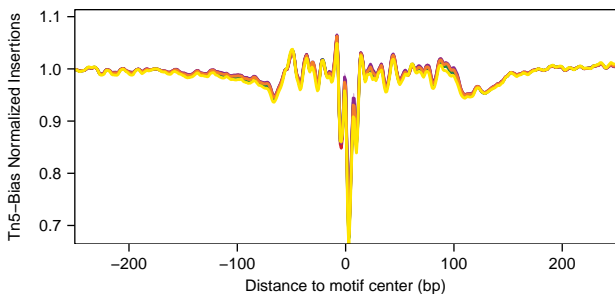

group

|       |      |           |
|-------|------|-----------|
| Lamp5 | Sncg | Sst Chodl |
| Pvalb | Sst  | Vip       |

Rarb.var.2\_71

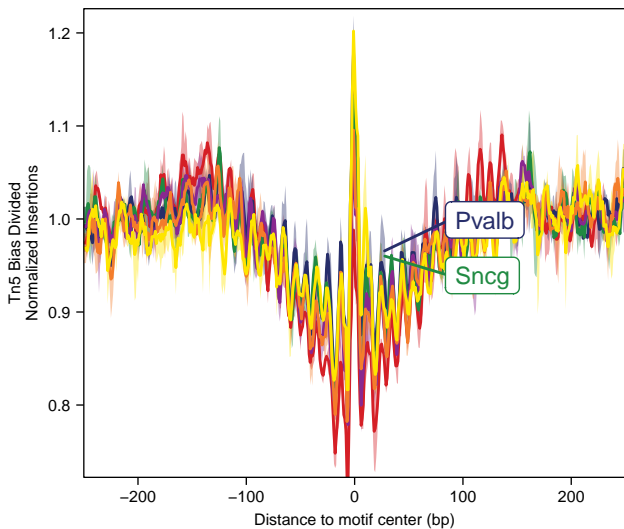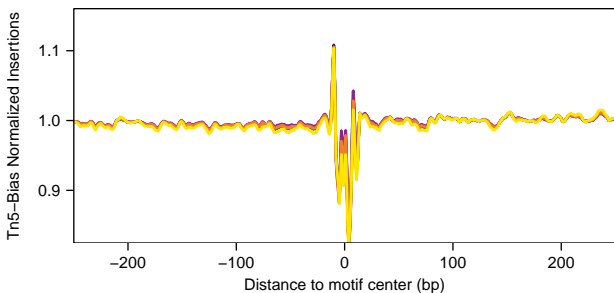

group

|                                           |                                           |                                                 |
|-------------------------------------------|-------------------------------------------|-------------------------------------------------|
| <span style="color: red;">■</span> Lamp5  | <span style="color: green;">■</span> Sncg | <span style="color: orange;">■</span> Sst Chodl |
| <span style="color: blue;">■</span> Pvalb | <span style="color: purple;">■</span> Sst | <span style="color: yellow;">■</span> Vip       |

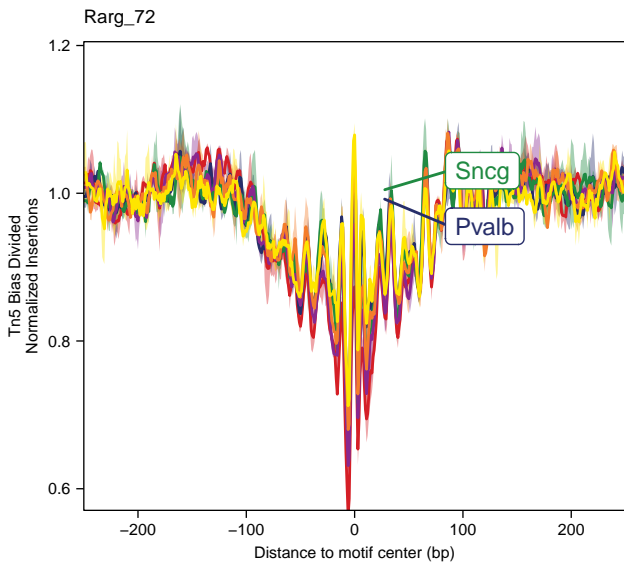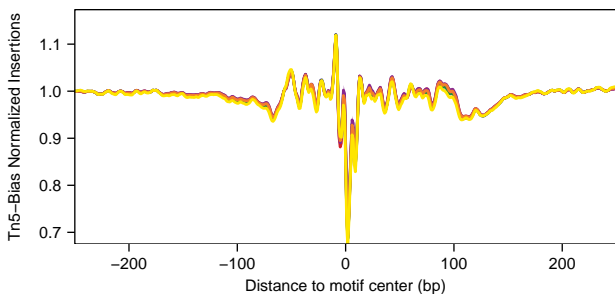

group

|       |      |           |
|-------|------|-----------|
| Lamp5 | Sncg | Sst Chodl |
| Pvalb | Sst  | Vip       |

Rarg.var.2\_73

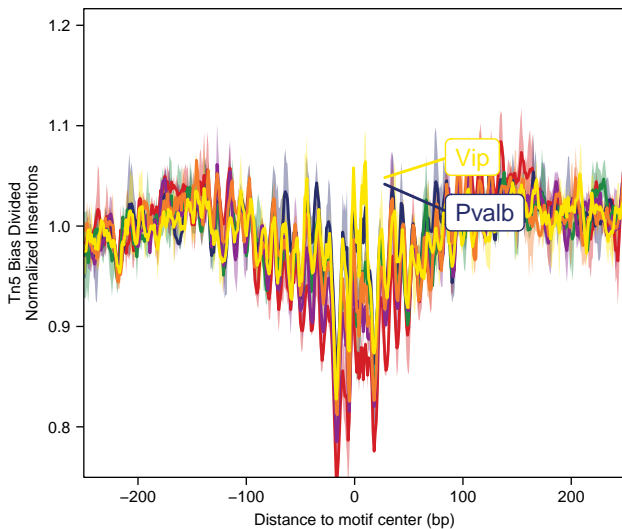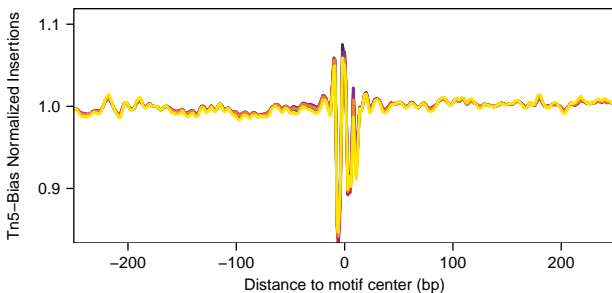

group

- Lamp5
- Pvalb
- Snog
- Sst
- Sst Chodl
- Vip

Sox11\_74

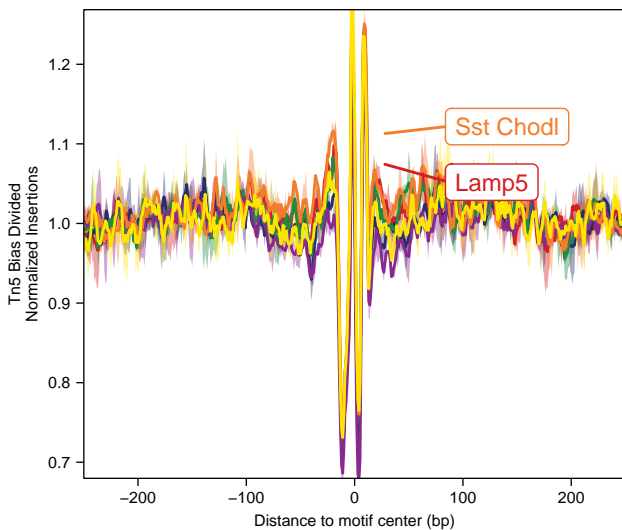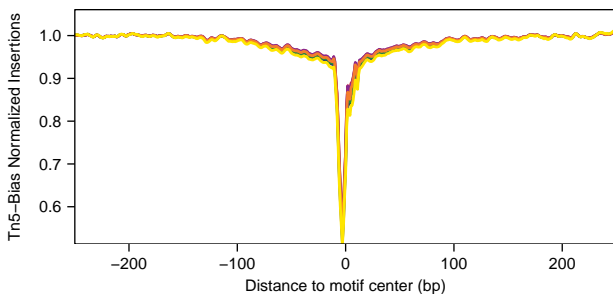

group

|       |      |           |
|-------|------|-----------|
| Lamp5 | Snog | Sst Chodl |
| Pvalb | Sst  | Vip       |

Sox1\_75

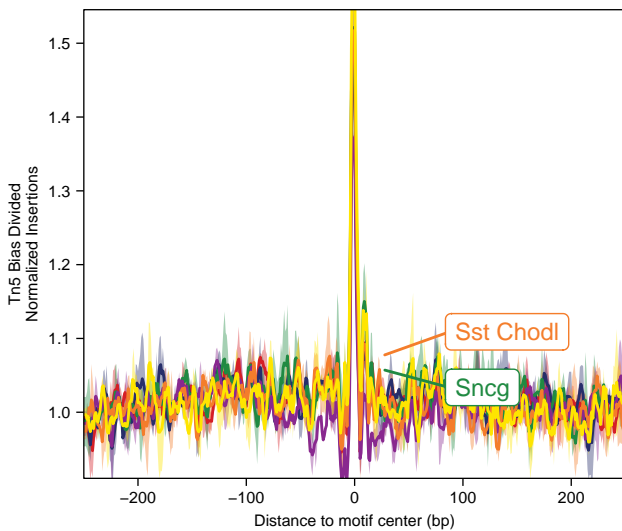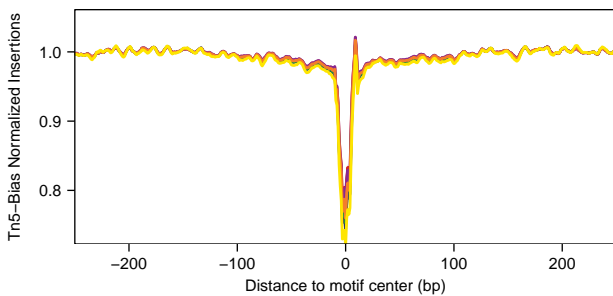

group

|       |      |           |
|-------|------|-----------|
| Lamp5 | Sncg | Sst Chodl |
| Pvalb | Sst  | Vip       |

Arx\_76

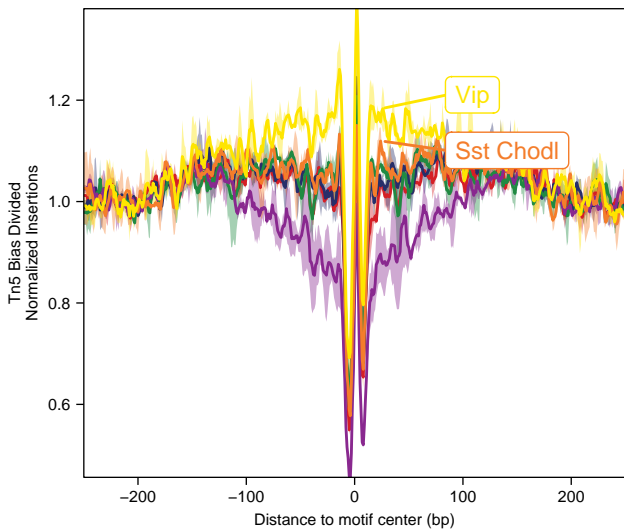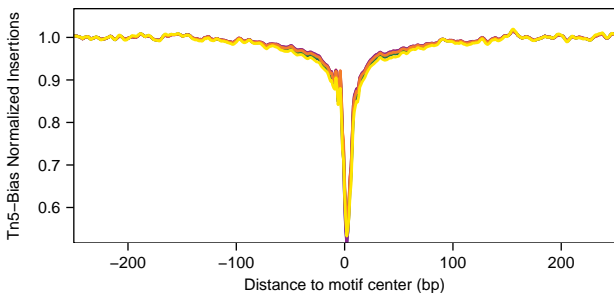

group

|       |      |           |
|-------|------|-----------|
| Lamp5 | Sneg | Sst Chodl |
| Pvalb | Sst  | Vip       |



Dlx1\_77

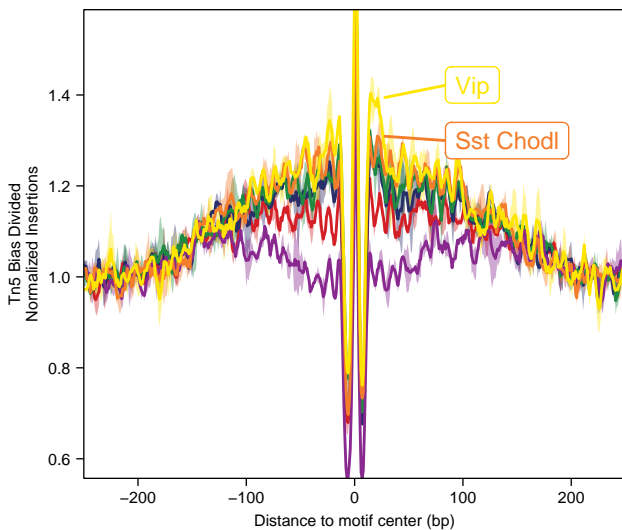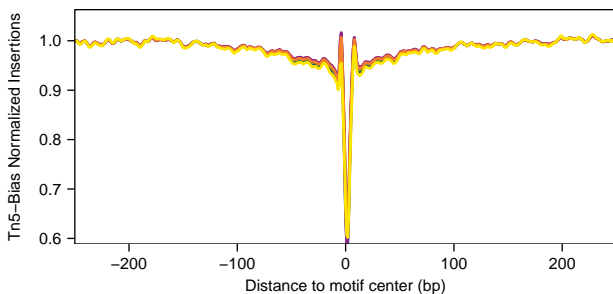

group

|       |      |           |
|-------|------|-----------|
| Lamp5 | Sneg | Sst Chodl |
| Pvalb | Sst  | Vip       |

Dlx3\_78

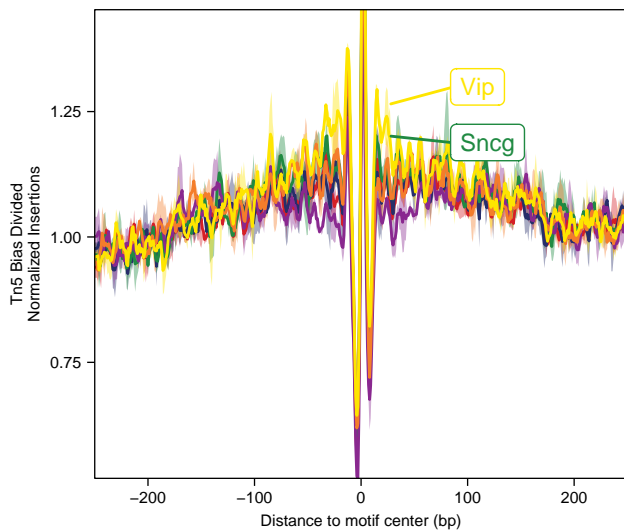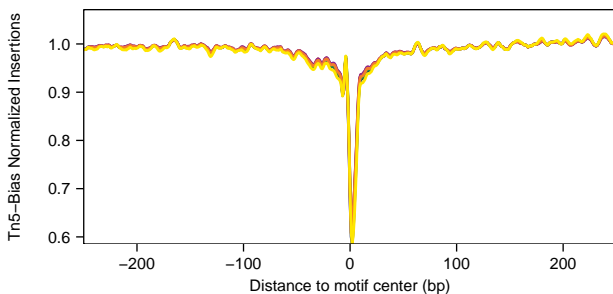

group

|       |      |           |
|-------|------|-----------|
| Lamp5 | Sncg | Sst Chodl |
| Pvalb | Sst  | Vip       |

Dlx4\_79

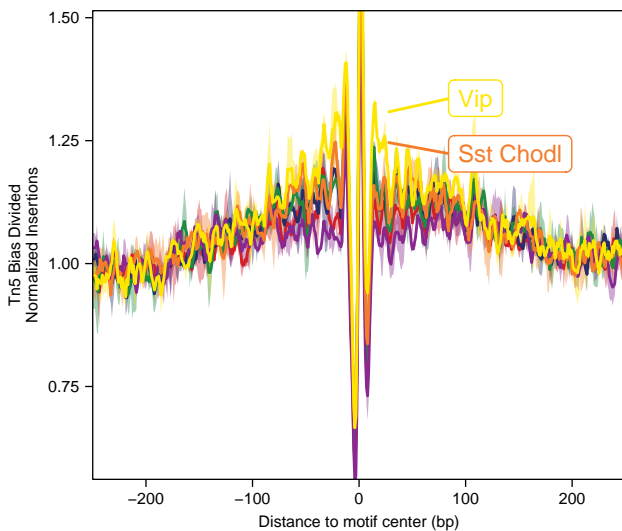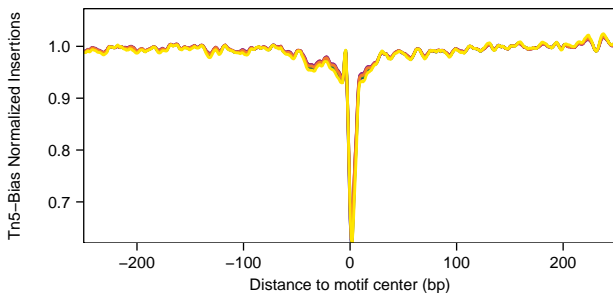

group

|       |      |           |
|-------|------|-----------|
| Lamp5 | Sncg | Sst Chodl |
| Pvalb | Sst  | Vip       |

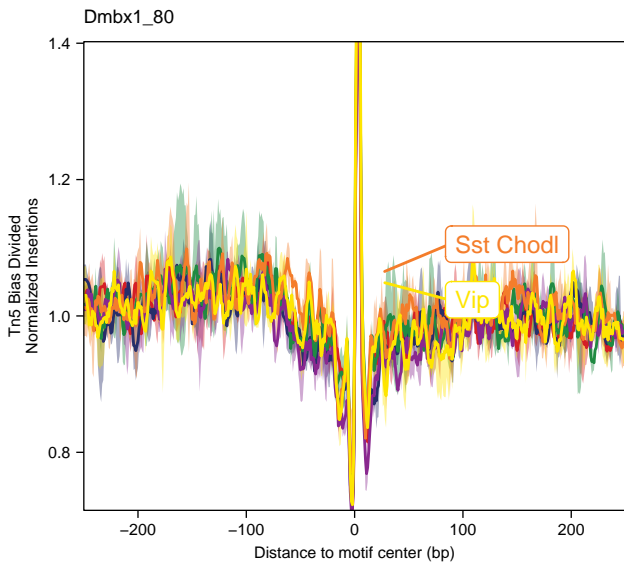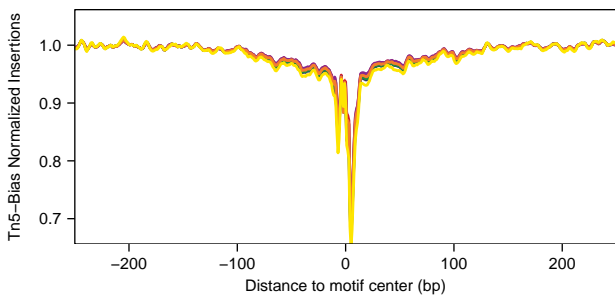

group

|       |      |           |
|-------|------|-----------|
| Lamp5 | Snog | Sst Chodl |
| Pvalb | Sst  | Vip       |

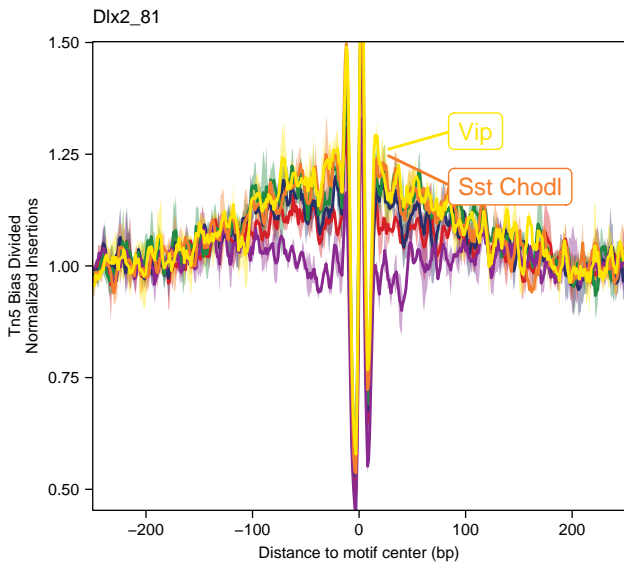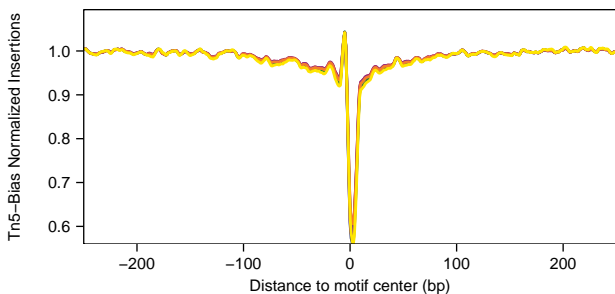

group

|       |      |           |
|-------|------|-----------|
| Lamp5 | Sncg | Sst Chodl |
| Pvalb | Sst  | Vip       |

Hmx1\_82

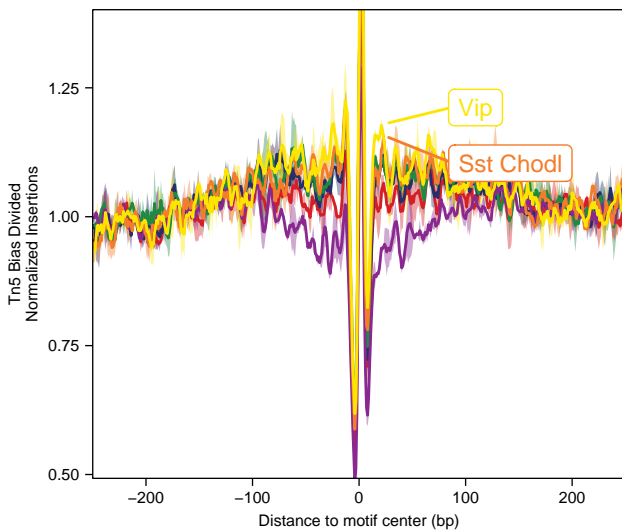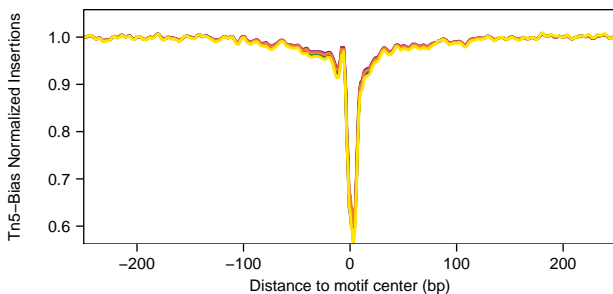

group  
Lamp5 Sncg Sst Chodl  
Pvalb Sst Vip

Hmx2\_83

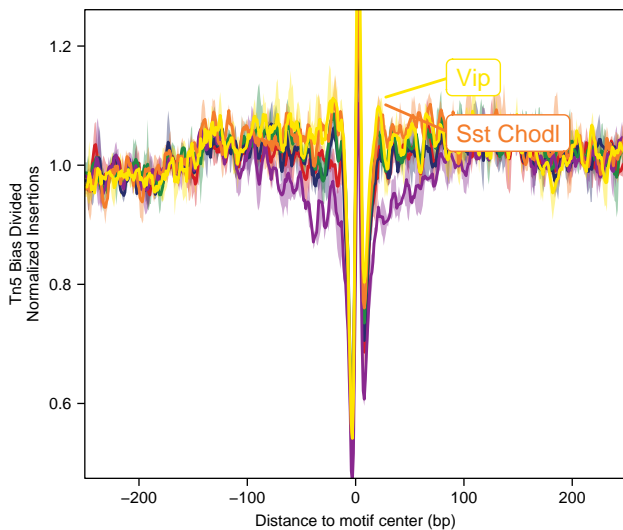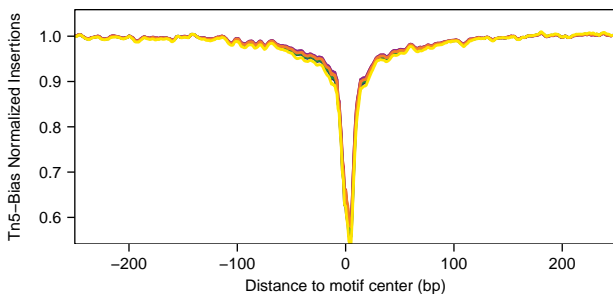

group

|       |      |           |
|-------|------|-----------|
| Lamp5 | SnCG | Sst Chodl |
| Pvalb | Sst  | Vip       |

Hmx3\_84

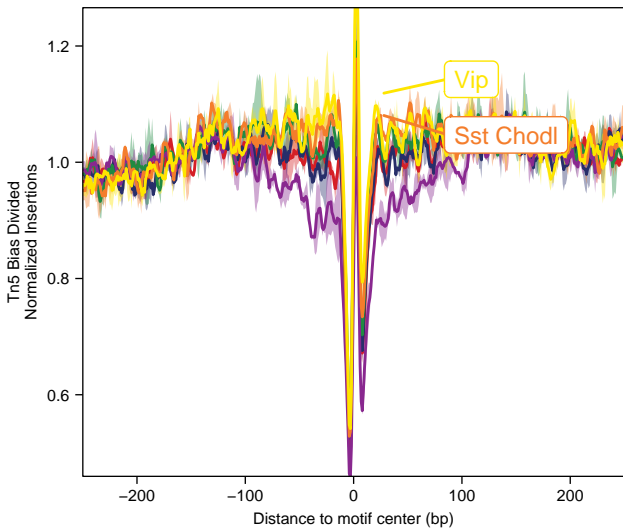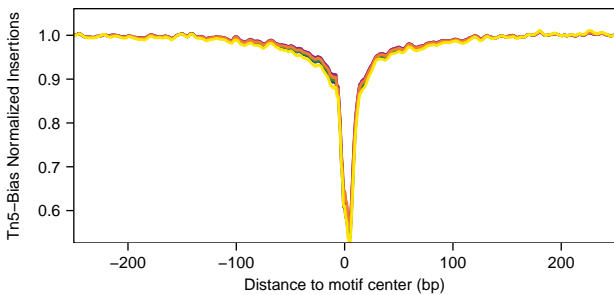

group

|       |      |           |
|-------|------|-----------|
| Lamp5 | Sncg | Sst Chodl |
| Pvalb | Sst  | Vip       |



Hoxa11\_85

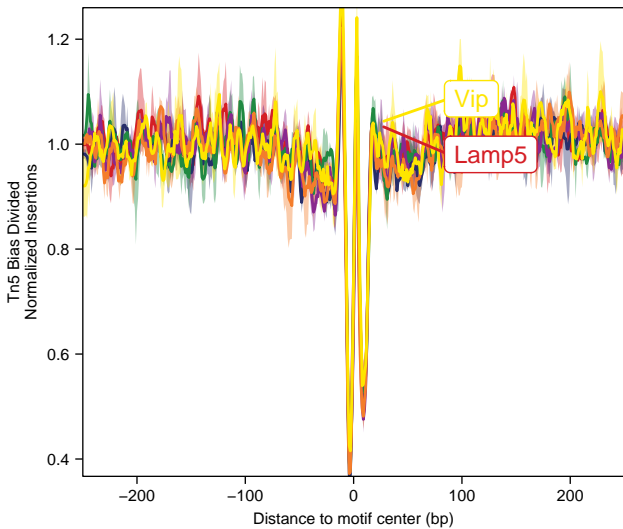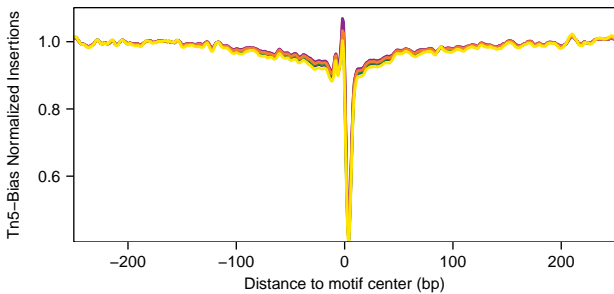

group

|       |      |           |
|-------|------|-----------|
| Lamp5 | Sneg | Sst Chodl |
| Pvalb | Sst  | Vip       |

Smad4\_86

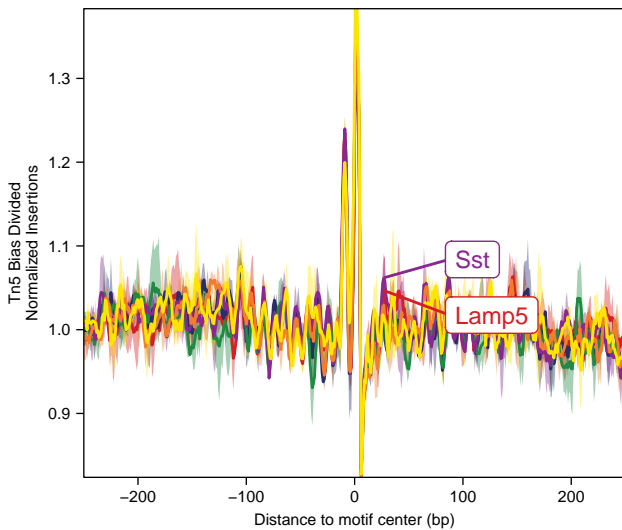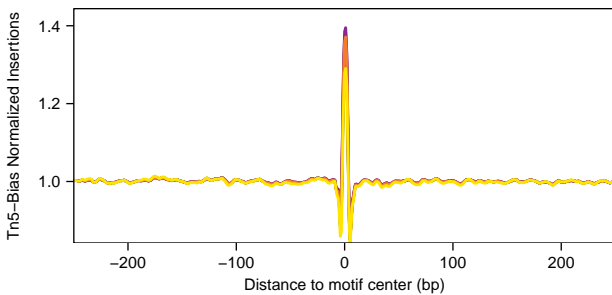

group

|       |      |           |
|-------|------|-----------|
| Lamp5 | Snog | Sst Chodl |
| Pvalb | Sst  | Vip       |

Dmrt1\_87

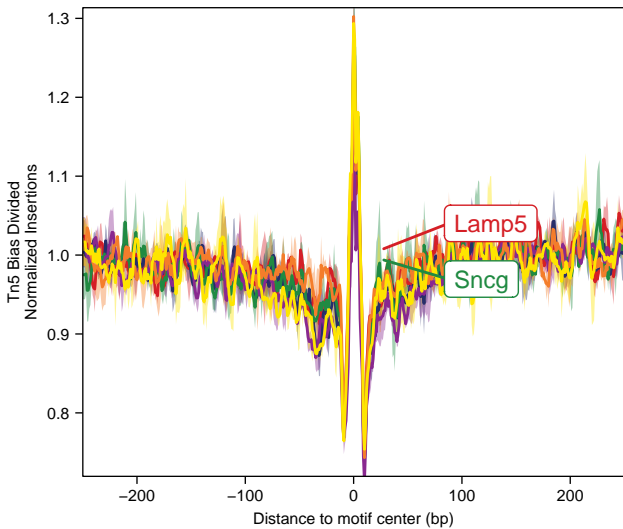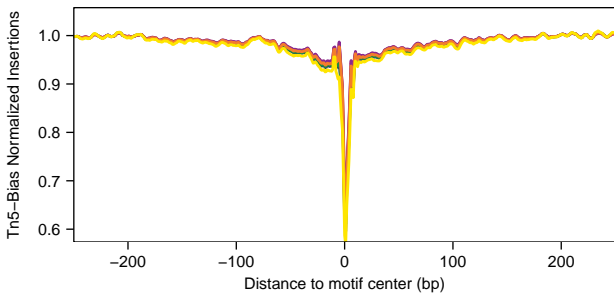

group

|       |      |           |
|-------|------|-----------|
| Lamp5 | Sncg | Sst Chodl |
| Pvalb | Sst  | Vip       |

Ebf2\_88

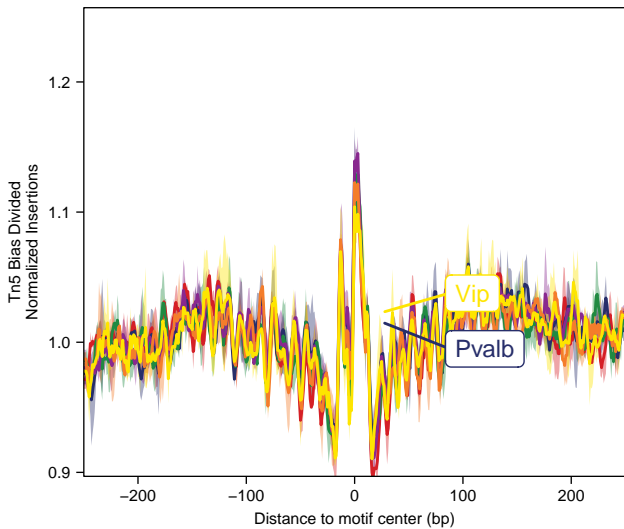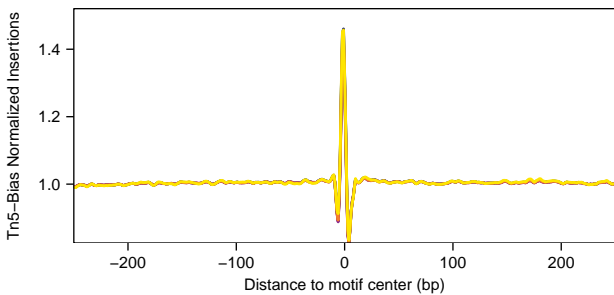

group

|       |      |           |
|-------|------|-----------|
| Lamp5 | Sneg | Sst Chodl |
| Pvalb | Sst  | Vip       |

Foxf1\_89

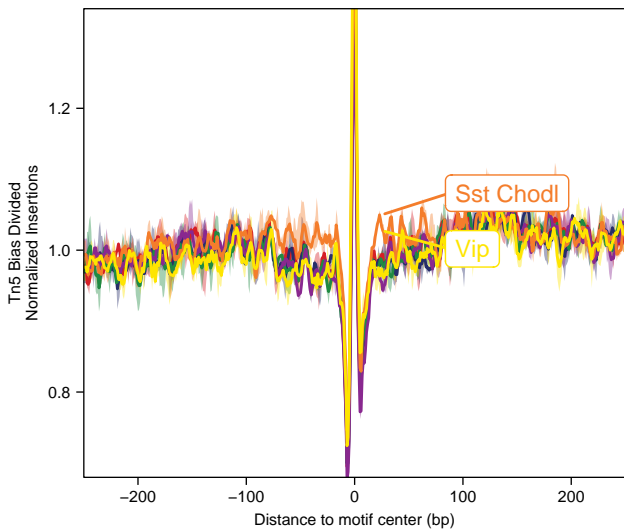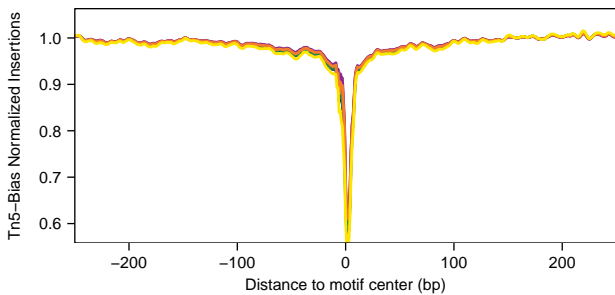

group

|       |      |           |
|-------|------|-----------|
| Lamp5 | Snog | Sst Chodl |
| Pvalb | Sst  | Vip       |

Foxl2\_90

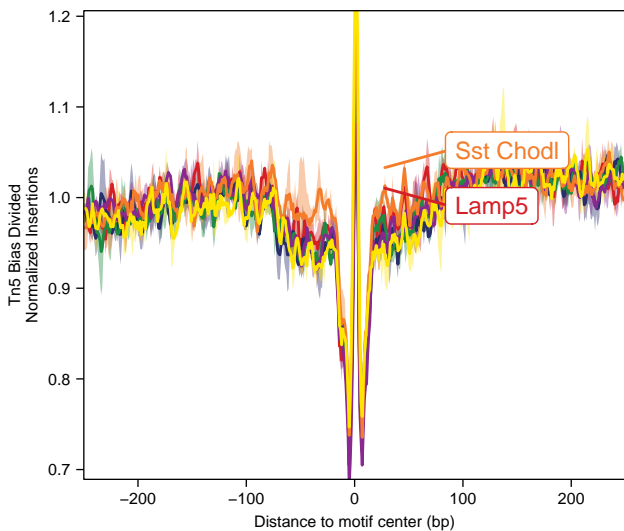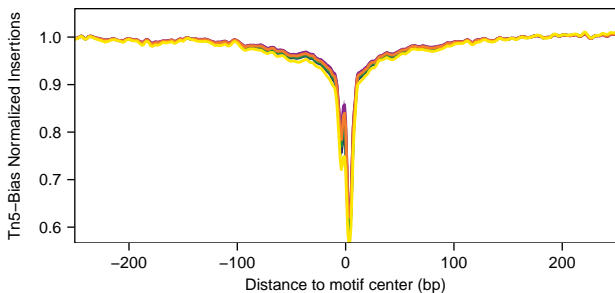

group

|       |      |           |
|-------|------|-----------|
| Lamp5 | Snog | Sst Chodl |
| Pvalb | Sst  | Vip       |

Isl1\_91

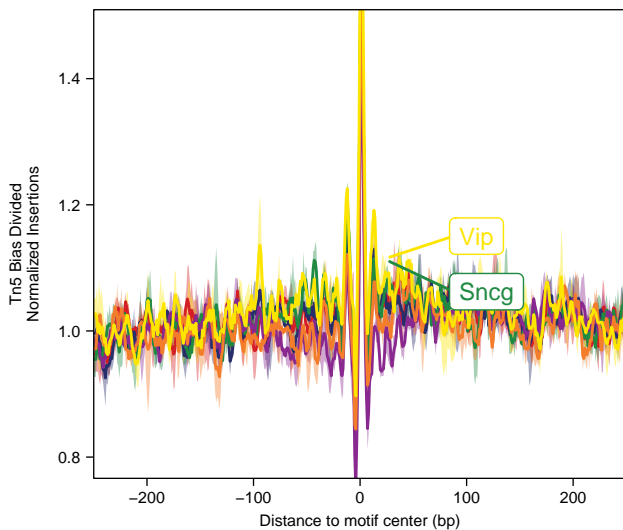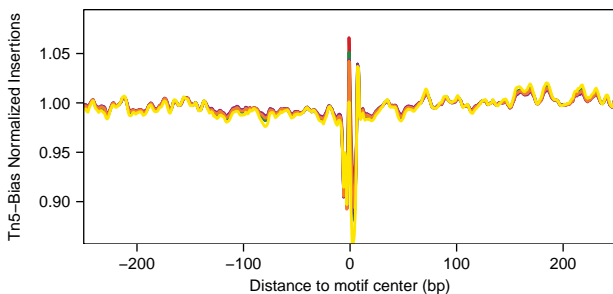

group

|       |      |           |
|-------|------|-----------|
| Lamp5 | Sncg | Sst Chodl |
| Pvalb | Sst  | Vip       |

Plagl1\_92

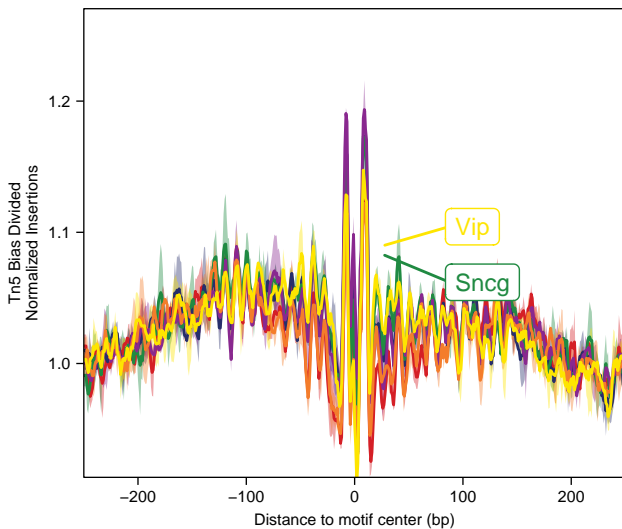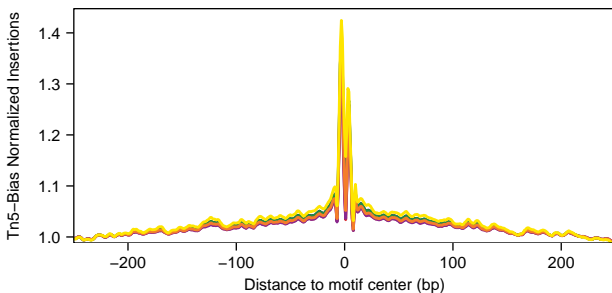

group

|       |      |           |
|-------|------|-----------|
| Lamp5 | Sncg | Sst Chodl |
| Pvalb | Sst  | Vip       |



Prdm15\_93

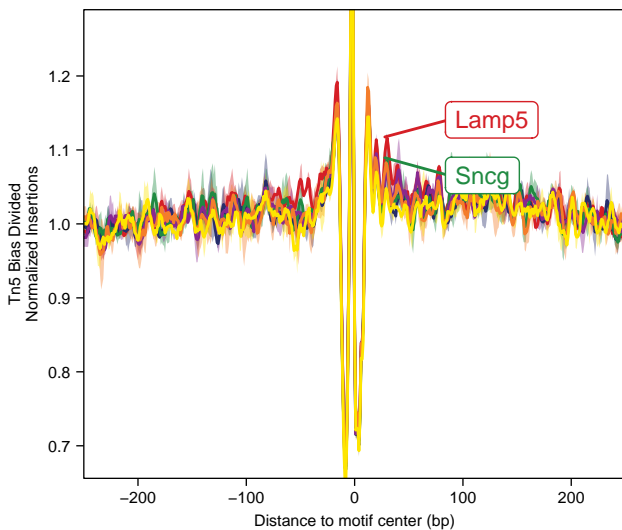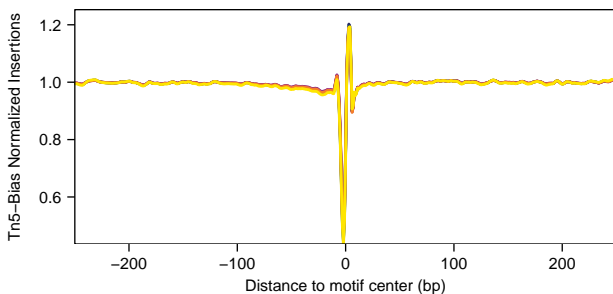

group

|                                           |                                           |                                                 |
|-------------------------------------------|-------------------------------------------|-------------------------------------------------|
| <span style="color: red;">■</span> Lamp5  | <span style="color: green;">■</span> Sncg | <span style="color: orange;">■</span> Sst Chodl |
| <span style="color: blue;">■</span> Pvalb | <span style="color: purple;">■</span> Sst | <span style="color: yellow;">■</span> Vip       |

Ptf1a\_94

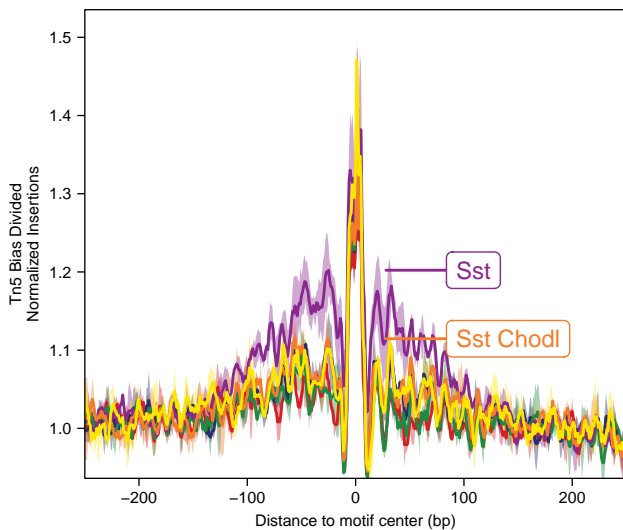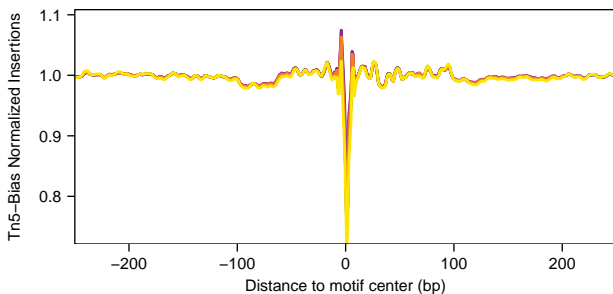

group

|       |      |           |
|-------|------|-----------|
| Lamp5 | Snog | Sst Chodl |
| Pvalb | Sst  | Vip       |

Ptf1a.var.2\_95

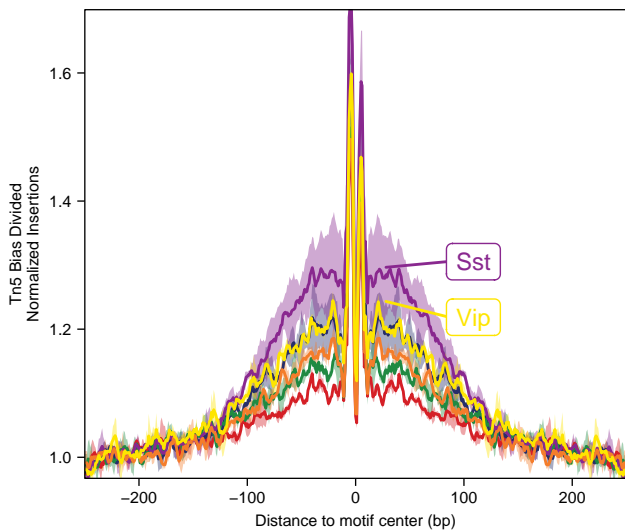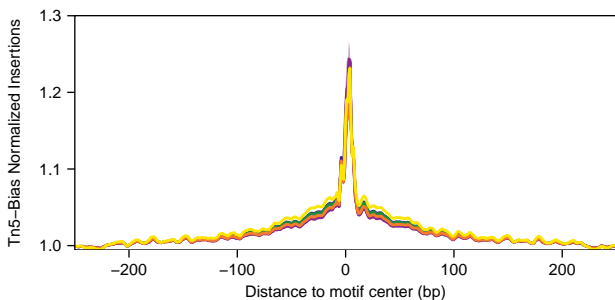

group

|       |      |           |
|-------|------|-----------|
| Lamp5 | Sneg | Sst Chodl |
| Pvalb | Sst  | Vip       |

Ptf1a.var.3\_96

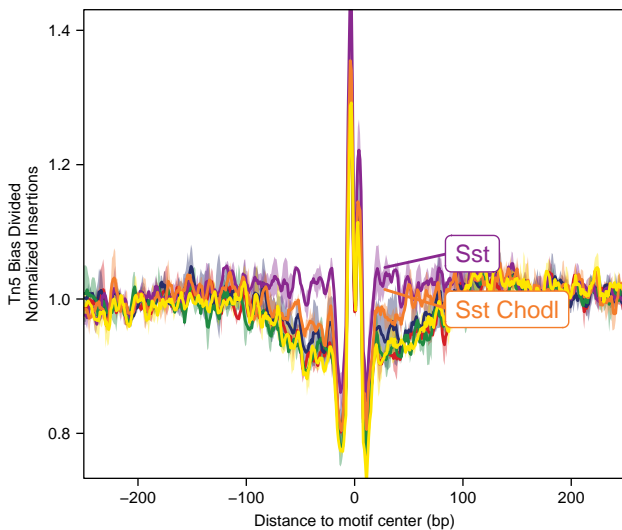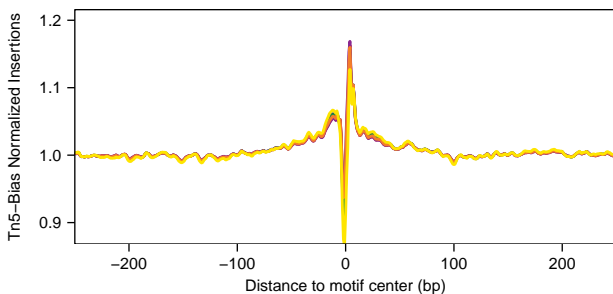

group

|       |      |           |
|-------|------|-----------|
| Lamp5 | Snog | Sst Chodl |
| Pvalb | Sst  | Vip       |

Rbpjl\_97

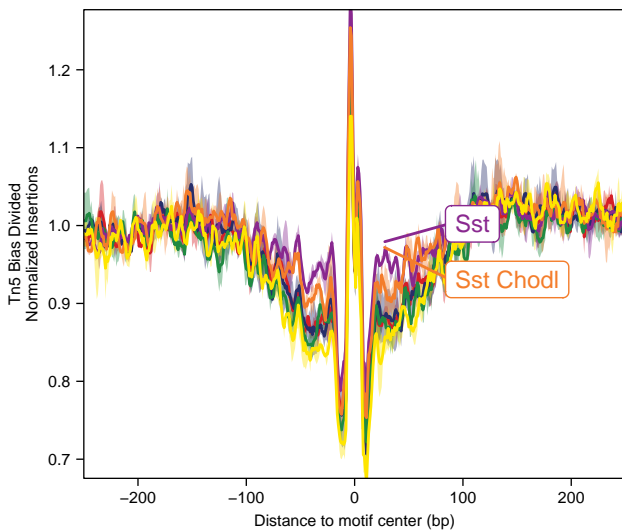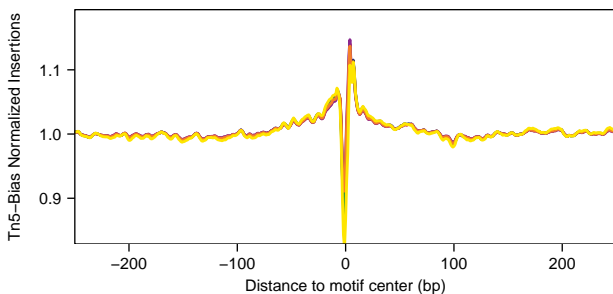

group

|                                           |                                           |                                                 |
|-------------------------------------------|-------------------------------------------|-------------------------------------------------|
| <span style="color: red;">■</span> Lamp5  | <span style="color: green;">■</span> Sneg | <span style="color: orange;">■</span> Sst Chodl |
| <span style="color: blue;">■</span> Pvalb | <span style="color: purple;">■</span> Sst | <span style="color: yellow;">■</span> Vip       |

Smad2..Smad3\_98

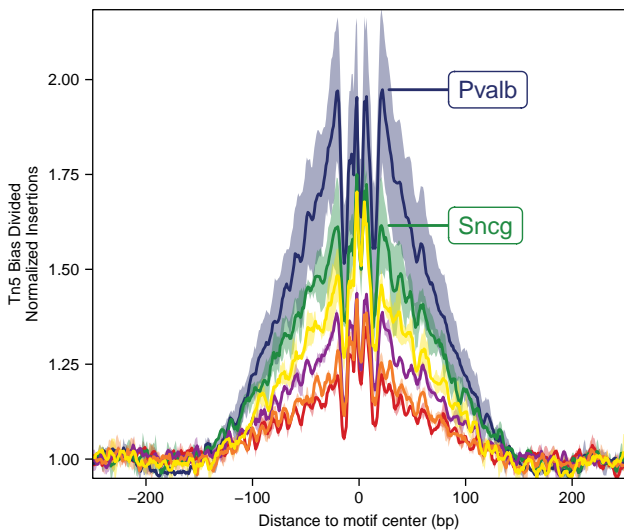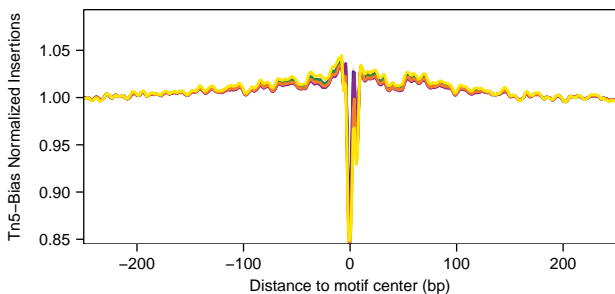

group  
Lamp5 Pvalb Sncg Sst Sst Chodl Vip

Stat2\_99

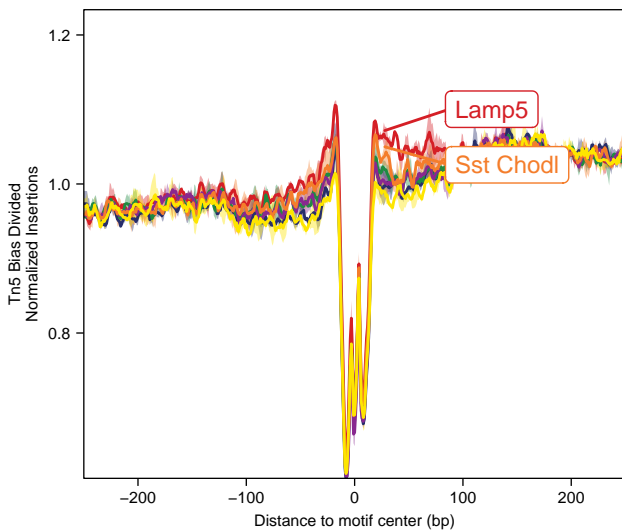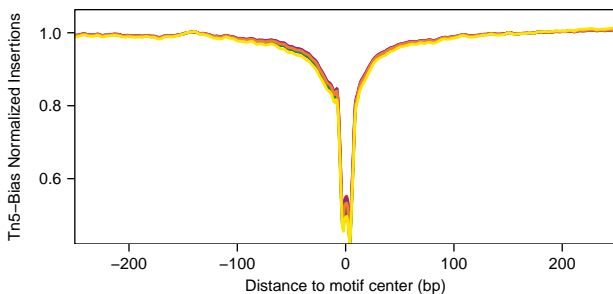

group

|       |      |           |
|-------|------|-----------|
| Lamp5 | Snog | Sst Chodl |
| Pvalb | Sst  | Vip       |

Stat5a\_100

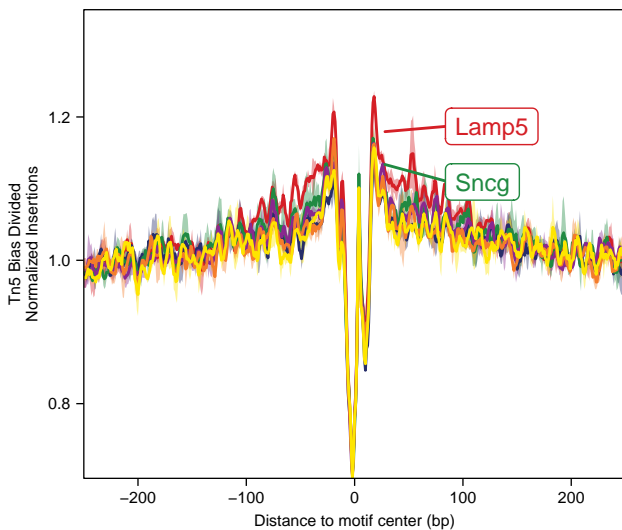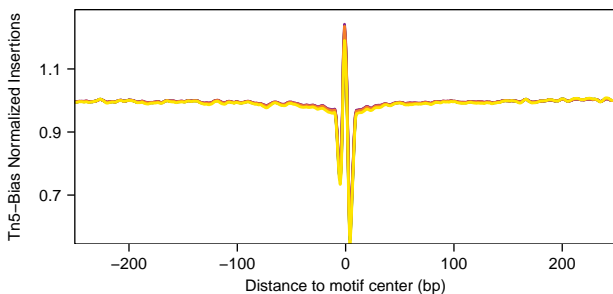

group

|       |      |           |
|-------|------|-----------|
| Lamp5 | Sncg | Sst Chodl |
| Pvalb | Sst  | Vip       |



Stat5b\_101

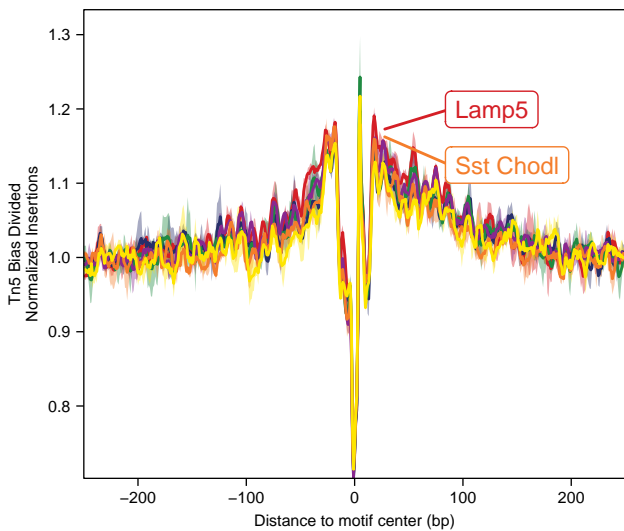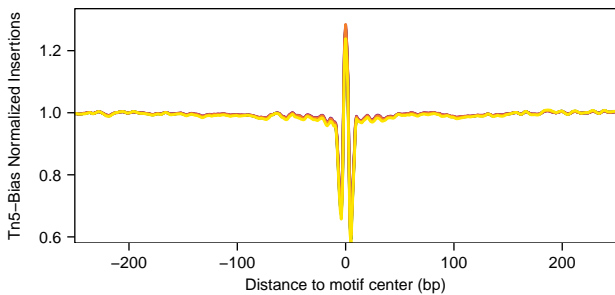

group

|       |      |           |
|-------|------|-----------|
| Lamp5 | Snog | Sst Chodl |
| Pvalb | Sst  | Vip       |

Wt1\_102

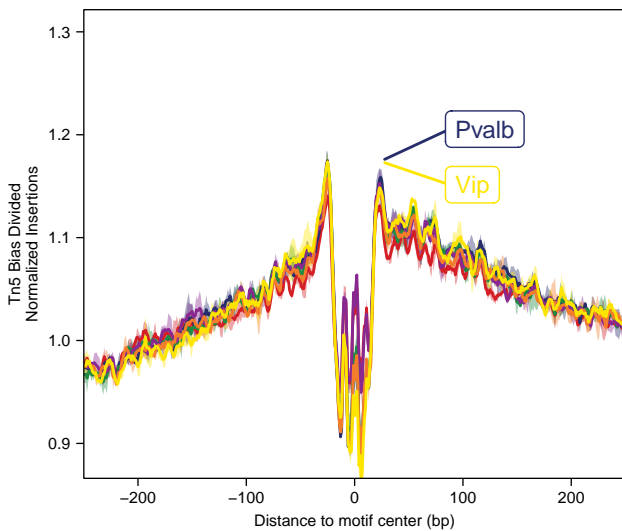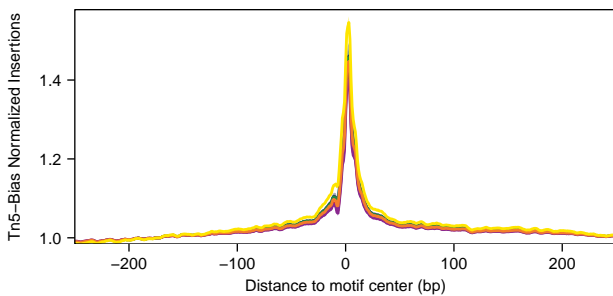

Zic1..Zic2\_103

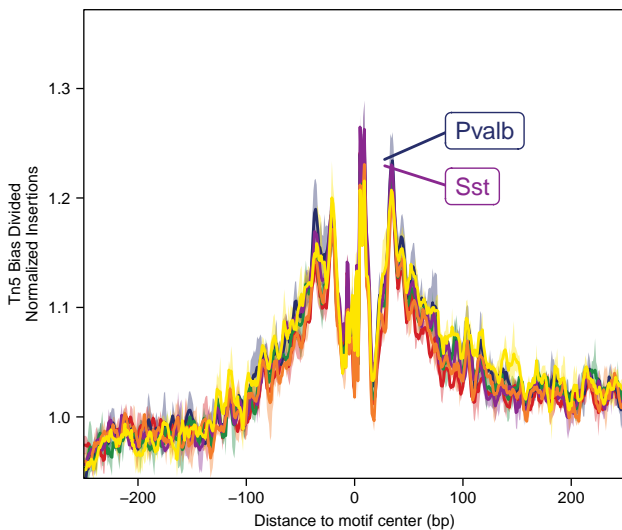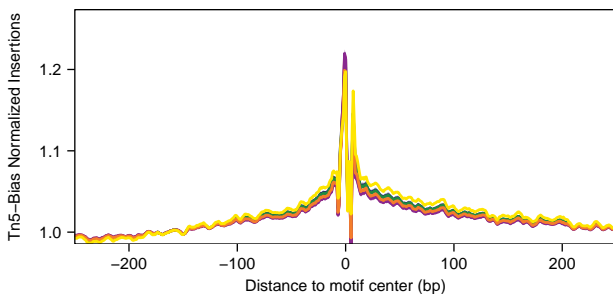

group

|       |      |           |
|-------|------|-----------|
| Lamp5 | Snog | Sst Chodl |
| Pvalb | Sst  | Vip       |

Zic2\_104

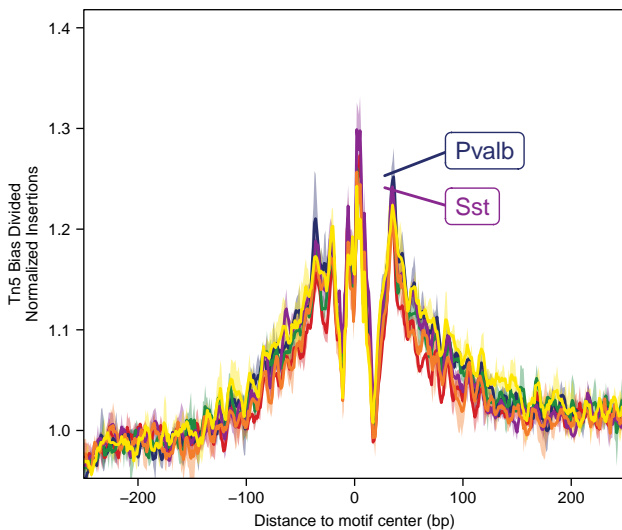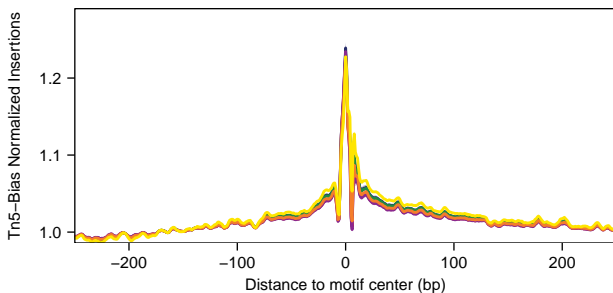

group

|       |      |           |
|-------|------|-----------|
| Lamp5 | Snog | Sst Chodl |
| Pvalb | Sst  | Vip       |

Znf281\_105

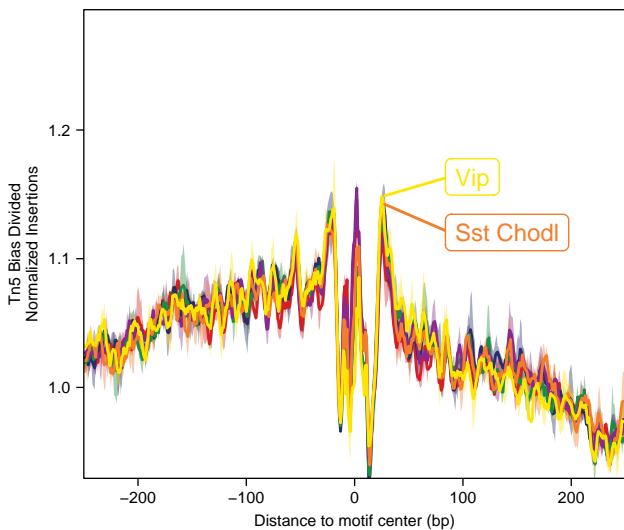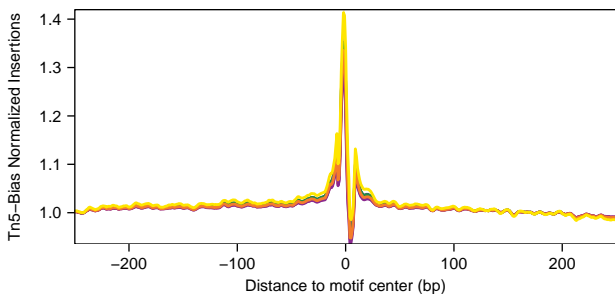

group

|       |      |           |
|-------|------|-----------|
| Lamp5 | Sneg | Sst Chodl |
| Pvalb | Sst  | Vip       |

Nkx3.2\_106

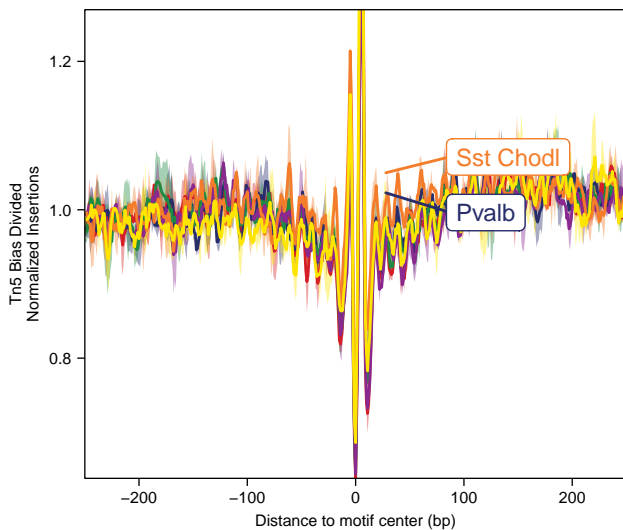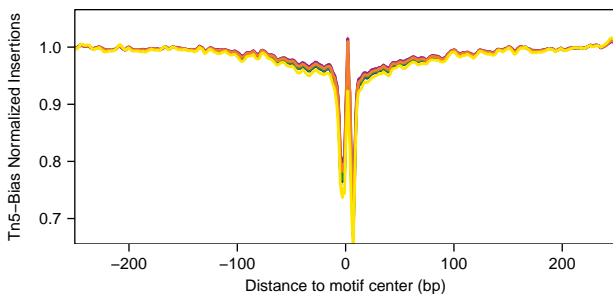

group

|       |      |           |
|-------|------|-----------|
| Lamp5 | Snog | Sst Chodl |
| Pvalb | Sst  | Vip       |

Foxn1\_107

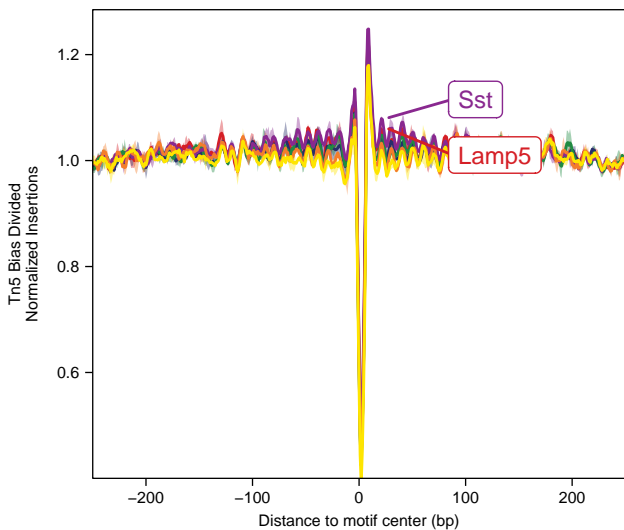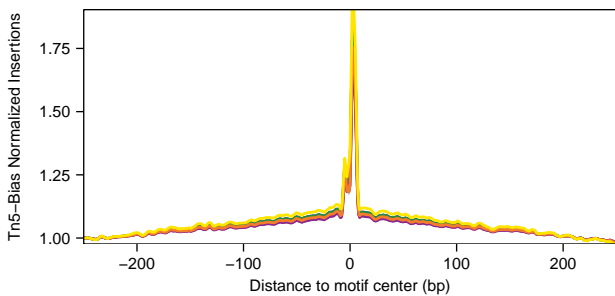

group

|       |      |           |
|-------|------|-----------|
| Lamp5 | Sncg | Sst Chodl |
| Pvalb | Sst  | Vip       |
