# Supplementary material for: Atlas-scale single-cell chromatin accessibility using nanowell-based combinatorial indexing
Source: HighWire-hosted journal article supplement (doi:10.1101/gr.276655.122), 2023-02-01
Supplement: Supplemental_File_S2.zip [file Supplemental_File_S2_Legend.docx]

**Supplemental File S2: Transcription Factor Footprinting in GABAergic Populations**

Aggregate per-cluster TF motif fooprints plotted using ArchR for each of the three datasets.
