# Supplementary material for: Atlas-scale single-cell chromatin accessibility using nanowell-based combinatorial indexing
Source: HighWire-hosted journal article supplement (doi:10.1101/gr.276655.122), 2023-02-01
Supplement: Supplemental_File_S3.pdf [file Supplemental_File_S3.pdf]

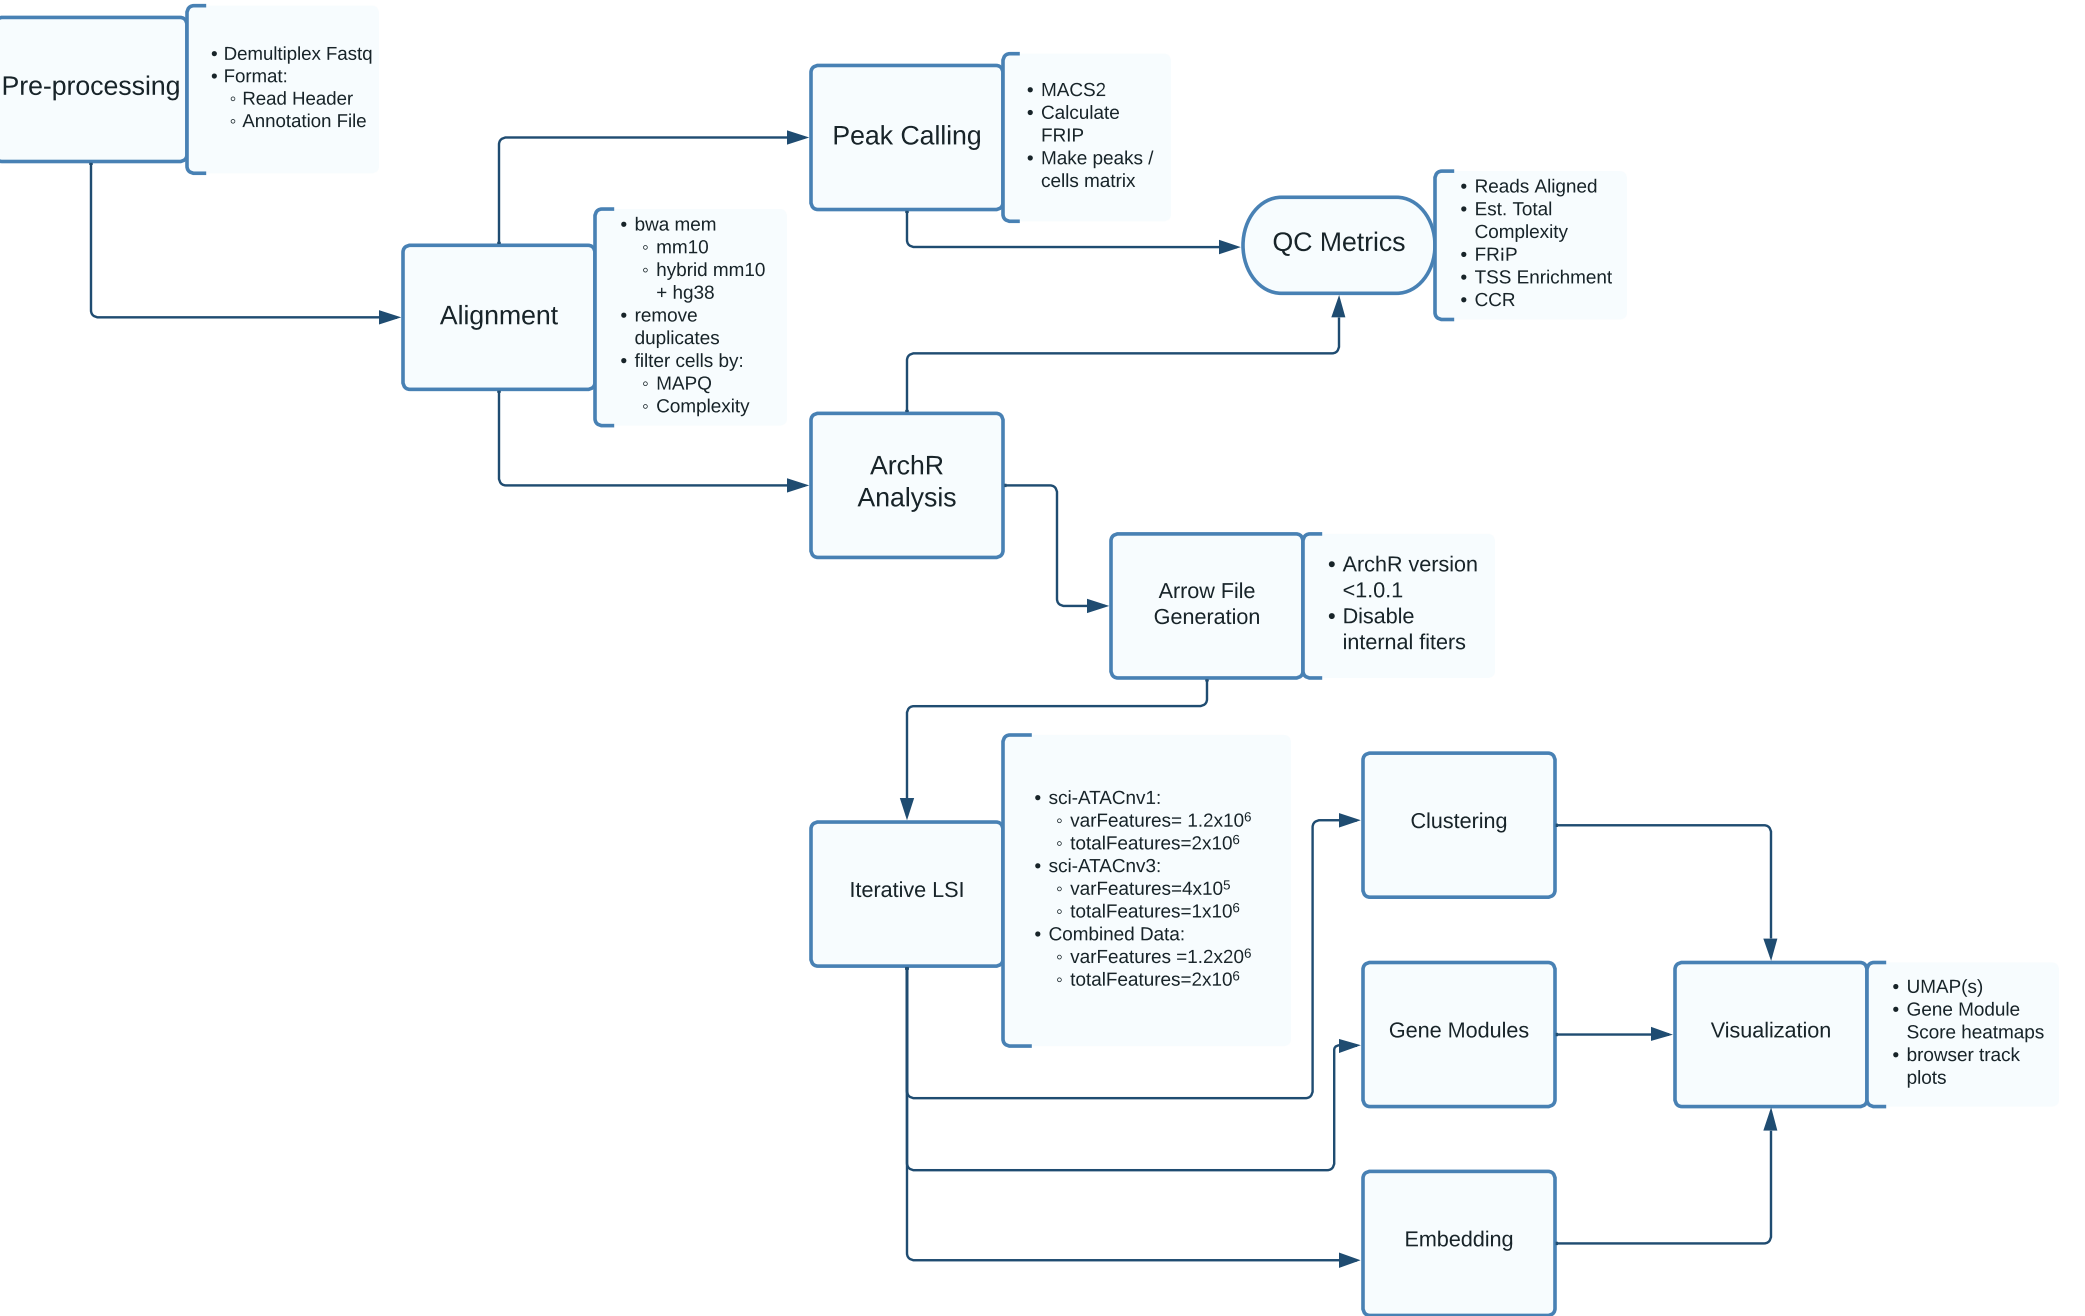

**Supplemental File S3: Analysis Workflow**

Computational analysis flowchart of analyses performed for cell type identification for each dataset.
