# Supplementary material for: Atlas-scale single-cell chromatin accessibility using nanowell-based combinatorial indexing
Source: HighWire-hosted journal article supplement (doi:10.1101/gr.276655.122), 2023-02-01
Supplement: Supplemental_Tables.xlsx [file Supplemental_Tables.xlsx]

## Sheet: Supplementary Table S1
Library	iCell8 Cells loaded	Total Reads >q10	Unique, >q10, autosomal	Num cells after cutoff	Min Read Cutoff	Recovery	Mean Unique	Median Unique Reads	Estimated Saturation	Num peaks called	FRIP	TSS Enrich	Doublet Rate (from barnyard)	Cross-contamination rate (barnyard)
Pilot GM12878	350000	1000000000	470000000	95367	1000	0.27	5833	3290	0.148	224399	0.71	43.18	N/A	N/A
Mouse Brain sciATAC with GM12878 spike-in	585000	8260000000	5250000000	422000	500	0.72	5656	3275	0.295	457434	0.7	18.2	0.0215	0.24
Mouse Brainsci-ATAC v2 with K562 spike-in	500000	3990000000	4840000000	227785	3000	0.46	14311	9360	0.0381	1025793	0.84	13.28	0.017	0.1
Mouse Brainsci-ATAC v3 with K562 spike-in	77760	17400000000	8780000000	21239	80000	0.27	413504	324416	0.4801	624344	0.88	13.39	0	0
Supplementary Table S1
iCell8 parameters for total nuclei loaded onto the chip and the resulting metrics. TSS Enrichment reported in this table is using the ENCODE metric.

## Sheet: Supplementary Table S2
Supplementary Table S2: iCell8 dispensing parameters
Programmed dispenses for the iCell8 workflow.
35nl	PCR Primer 1
35nl	PCR Primer 2
50nl	Cells/Nuclei dispense
50nl	PCR MM
50nl	PCR MM
50nl	PCR MM

## Sheet: Supplementary Table S3
Supplementary Table 3: iCell8-specific PCR conditions
Optimized PCR cycling conditions to be performed on-chip using the custom BioRad PCR instrument that accompanies the iCell8 instrument.
76.1	00:10:00
72.1	05:00:00
100	00:18:00
99.6	01:42:00
100	00:18:00	12 cycles
99.6	00:12:00
56.4	00:05:00
61.7	00:45:00
76.1	00:10:00
72.1	00:50:00
72.1	05:00:00
4	∞
